# Supplementary material for: A longitudinal single-cell atlas to predict outcome and toxicity after BCMA-directed CAR T cell therapy in multiple myeloma
Source: Research Square preprint supplement (doi:10.21203/rs.3.rs-6165798/v1), 2025-03-18
Supplement: Supplementary file 1 [file 05160f9890ea83185a4773da.xlsx]

## Sheet: Suppl_Table_1
PFS_MONTH: Patients without progression were censored at last follow-up (LFU).
PATIENT_ID	SINGLE_CELL	SEX	AGE_AT_CAR_INFUSION	PRODUCT	STAGING_SALMON_DURIE	R_ISS	REMISSION_STATUS_BEFORE_CAR	BRIDGING_REDGIMEN	LINE_OF_THERAPIES	RESPONSE_1_M	RESPONSE_3_M	RESPONSE_6_M	RESPONSE_12_M	BEST_RESPONSE	PROGRESSION	PFS_MONTH	LFU_MONTH	REFRACTORINESS_GROUP	TOCILIZUMAB	CRS_GRADE	ICANS_GRADE	CRP_MAX
P01	yes	m	58	ide	IIIA	2	PD	SLAMF7	4	PD				PD	1	0.398142	5.37492	TCRRMM	no	1	0	12.14
P06	yes	w	67	ide	IIIB	2	PD	Chemotherapy	0	PD				PD	1	1.49303	9.85401	TCRRMM	no	0	0	12.65
P07	yes	m	71	cilta	IIIA	2	PR	CD38	3	CR				CR	0	2.55474	2.55474	TCexposed	no	1	0	265.42
P08	yes	m	62	cilta	IIIB	2	VGPR	CD38	4	CR	CR	CR	CR	CR	0	33.7094	33.7094	TCexposed	no	0	0	32.16
P09	yes	w	60	ide	IIIA	2	CR	Chemotherapy	5	VGPR	VGPR	VGPR	PD	VGPR	1	9.19044	24.9171	TCRRMM	no	1	0	153.96
P10	yes	m	42	ide		1	PD	SLAMF7	5	SD	PD			SD	1	2.09025	12.2097	TCRRMM	no	1	0	222.12
P11	yes	m	54	ide		3	PD	Chemotherapy	9	PR	PD			PR	1	2.45521	3.31785	TCRRMM	no	1	0	52.22
P12	yes	w	54	ide	IIIA	3	PD	CD38	12	VGPR	VGPR	CR	CR	CR	1	13.935	18.8122	PentaRRMM	yes	1	0	104.59
P13	yes	m	58	ide	IIIB		PD	CD38	5	PR	PD			PD	1	3.5501	3.5501	TCRRMM	no	0	0	35.32
P14	yes	w	39	ide		2	PD	CD38	11	nCR	CR	CR	CR	CR	0	16.4234	16.4234	TCRRMM	yes	1	0	391.68
P15	yes	m	60	ide	III	2	PD	Chemotherapy	7	CR	CR	PD		CR	1	4.37956	6.40345	PentaRRMM	yes	1	1	191.72
P16	yes	w	57	ide	III	2	PR	Chemotherapy	8	PD	PD			PD	1	0.89582	1.62575	PentaRRMM	yes	2	0	81.9
P17	yes	m	67	ide	IIIA	2	PD	CD38	7	CR	CR	CR	CR	CR	0	19.509	19.509	TCRRMM	no	1	0	324.03
P18	yes	m	62	ide		3	PR	SLAMF7	10	CR	CR	CR		CR	0	5.2422	5.2422	TCexposed	no	1	0	133.86
P19	yes	m	64	ide	IIIA	2	PD	Chemotherapy	9	VGPR	VGPR	VGPR	VGPR	VGPR	0	18.3145	18.3145	TCRRMM	yes	2	0	153.33
P20	yes	m	72	ide	IIIA	2	PR	Chemotherapy	10	PR	PR	PR	PD	PR	1	10.4512	12.5415	TCRRMM	no	1	0	96.35
P21	yes	m	62	ide	IIIA	3	VGPR	CD38	9	VGPR	VGPR	VGPR	PR	VGPR	1	15.793	17.1533	TCexposed	yes	2	0	76.24
P22	yes	m	43	ide		2	PR	Bispecific Ab	6	PD				PD	1	1.3935	12.5415	TCRRMM	no	1	0	4.98
P23	yes	m	64	ide	IIIA	2	PD	CD38	12	PD				PD	1	0.995355	12.0438	PentaRRMM	no	1	0	124.83
P24	yes	w	75	ide	IIIA	2	VGPR	Bispecific Ab	6	CR	CR	CR		CR	1	15.4944	16.5229	TCRRMM	no	1	0	97.55
P25	yes	w	65	ide	IIIA	2	PD	Chemotherapy	9	VGPR	VGPR	PR	PD	VGPR	1	6.00531	16.5561	TCRRMM	no	1	0	139.7
P26	yes	m	65	ide		2	VGPR	CD38	6	VGPR	VGPR	CR	CR	CR	0	14.6317	14.6317	TCRRMM	no	2	0	211.02
P27	yes	w	65	ide	III	2	VGPR	CD38	7	VGPR	VGPR	VGPR		VGPR	0	14.3995	14.3995	TCRRMM	no	1	0	53.4
P28	yes	w	65	ide	IIIA	1	VGPR	SLAMF7	8	CR	CR	PD		CR	1	3.31785	8.09555	TCRRMM	yes	1	0	335.24
P29	no	m	67	ide	IIA	3	SD	CD38	12	PD				PD	1	0.763106	14.6981	PentaRRMM	no	0	0	6.97
P30	yes	m	64	ide	III	2	VGPR	CD38	8	CR	CR	CR	CR	CR	0	12.9728	12.9728	TCRRMM	no	1	0	171.2
P31	yes	m	52	ide	IIIB	3	PR	Bispecific Ab	5	PR	PD			PD	1	2.05707	3.58328	TCRRMM	no	1	0	218.39
P32	yes	w	63	ide	IIIA	2	CR	Bispecific Ab	10	CR	CR	CR	CR	CR	0	13.5368	13.5368	PentaRRMM	no	0	0	101.09
P33	yes	w	75	ide	IIIA	2	CR	Bispecific Ab	13	CR	CR	CR	CR	CR	0	13.1055	13.1055	PentaRRMM	no	0	0	143.81
P34	yes	m	64	ide	IIIA	2	PR	CD38	11	VGPR	VGPR	VGPR	VGPR	VGPR	0	12.1433	12.1433	TCRRMM	no	0	0
P35	yes	w	52	ide	IIIA	2	PR	SLAMF7	6	VGPR	VGPR	VGPR	CR	CR	0	16.0584	16.0584	TCexposed	yes	2	0	231.32
P36	yes	w	66	ide	IIIA	2	PD	Chemotherapy	10	SD	PD	PD		SD	1	0.928998	11.1148	PentaRRMM	no	1	0	54.88
P37	yes	m	74	ide	IIIB	2	PD	SLAMF7	7	PD				PD	1	0.928998	10.5508	TCRRMM	no	1	0	42.68
P38	yes	m	71	ide	IIIA	2	PD	CD38	11	VGPR	VGPR	PD		VGPR	1	5.80624	10.2522	PentaRRMM	yes	2	0	144.34
P39	yes	m	71	ide	IIIA	2	PD	Chemotherapy	6	VGPR	VGPR	VGPR	CR	CR	0	15.1294	15.1294	TCRRMM	no	0	0	79.1
P40	yes	m	71	cilta	III	3	PD	SLAMF7	5	CR	CR	CR	CR	CR	0	15.8593	15.8593	PentaRRMM	no	1	0	106.78
P41	yes	w	58	cilta		2	CR	Chemotherapy	6	CR	CR	CR		CR	0	13.8354	13.8354	PentaRRMM	no	0	0	10.25
P42	yes	w	31	cilta	IA	2	PR	CD38	3	CR	CR	CR	CR	CR	0	15.5939	15.5939	TCexposed	no	1	0
P43	yes	w	73	cilta	IIIA	3	PR	Bispecific Ab	8	PD	PD			PD	1	0.763106	3.01924	TCRRMM	no	0	0	104.29
P44	yes	w	70	cilta	IIIA	2	PR	Chemotherapy	6	VGPR	CR	CR		CR	0	11.8779	11.8779	TCexposed	no	1	0	53.36
P45	yes	m	58	cilta	IIIA	2	PR	Chemotherapy	7	CR	CR	CR	CR	CR	0	14.1009	14.1009	TCRRMM	no	0	0	18.77
P46	yes	w	51	cilta	IIIA	2	VGPR	CD38	6	CR	CR	CR	CR	CR	0	14.4658	14.4658	TCexposed	no	1	0	48.56
P47	no	m	57	ide		3	PD	CD38	5	VGPR	VGPR	PD	PD	VGPR	1	3.25149	10.8162	TCRRMM	yes	2	0	183.77
P48	yes	w	72	cilta	IIIA	2	VGPR	Bispecific Ab	5	VGPR	CR	CR		CR	0	13.7027	13.7027	TCRRMM	no	0	0	59.13
P49	yes	m	61	cilta	IIIB	2	PD	CD38	6	CR	CR	CR	CR	CR	0	12.2097	12.2097	TCRRMM	yes	2	1	164.43
P50	yes	w	66	cilta	IIIA	1	VGPR	Bispecific Ab	5	VGPR	CR	CR	CR	CR	0	13.205	13.205	TCRRMM	no	0	0	10.96
P51	yes	w	67	cilta	IIIB	2	PD	Chemotherapy	6	CR	CR	CR		CR	0	6.83477	6.83477	TCRRMM	no	1	0	27.59
P52	yes	m	63	cilta	IIIA	2	PR	Bispecific Ab	6	CR	CR	CR	CR	CR	0	10.6503	10.6503	TCexposed	yes	2	0	120.19
P53	yes	w	68	cilta	IIIA	2	PR	Chemotherapy	6	VGPR	VGPR	VGPR		VGPR	0	6.73524	6.73524	TCexposed	yes	1	1	38.14
P54	no	m	57	cilta		2	PR	CD38	1	VGPR	CR	CR		CR	0	5.64035	5.64035	TCexposed	yes	2	1	151.2
P55	yes	m	59	cilta	IIIB		VGPR	Bispecific Ab	7	CR	CR	CR	CR	CR	0	9.98673	9.98673	TCRRMM	no	1	0	13.2
P56	yes	w	70	cilta	IIIA	3	PD	SLAMF7	0	VGPR	VGPR	CR	CR	CR	0	10.4844	10.4844	TCexposed	no	1	0	125.62
P57	yes	m	68	cilta	IA	2	PD	Chemotherapy	15	VGPR	VGPR	VGPR		VGPR	1	3.41739	4.41274	PentaRRMM	no	0	0	35.83
P58	yes	m	69	cilta	II	3	PD	Chemotherapy	5	VGPR	CR	CR		CR	0	6.80159	6.80159	TCRRMM	yes	1	2	140.62
P59	yes	w	59	cilta	IIIA	3	PD	Bispecific Ab	7	CR	CR	CR		CR	0	6.33709	6.33709	TCexposed	no	0	0	39.17
P60	yes	m	62	cilta	IIIA	3	CR	Bispecific Ab	8	CR	CR			CR	0	2.22296	2.22296	TCRRMM	no	0	0	32.94
P61	yes	w	66	cilta	IIIA	3	PD	Bispecific Ab	4	VGPR	VGPR	VGPR	PD	VGPR	1	7.53152	8.7923	PentaRRMM	no	0	0	231.99
P62	yes	m	63	cilta	IIIA	2	PD	Chemotherapy	5	CR	CR	CR		CR	0	7.19973	7.19973	TCRRMM	no	0	0	132.82
P63	yes	m	68	cilta	IIIA	1	PR	Chemotherapy	7	VGPR	CR	CR		CR	0	8.56005	8.56005	PentaRRMM	no	1	0	77.98
P64	no	w	72	cilta	IIIB	3	PD	Bispecific Ab	7	PD				PD	1	1.95753	5.4081	TCRRMM	no	0	0	154.71
P65	yes	w	52	cilta	IIIA		VGPR	Bispecific Ab	8	VGPR	VGPR	VGPR		VGPR	0	7.13338	7.13338	PentaRRMM	no	0	0	3.2

## Sheet: Suppl_Table_2
PATIENT_ID	DAY	CD3_CAR_PERC	CD3_CAR_ABS	CD4_CAR_PERC	CD4_CAR_ABS	CD8_CAR_PERC	CD8_CAR_ABS
P09	LP	0	0	0	0	0	0
P06	LP	0	0	0	0	0	0
P10	LP	0	0	0	0	0	0
P01	LP	0	0	0	0	0	0
P13	LP	0	0	0	0	0	0
P12	LP	0	0	0	0	0	0
P15	LP	0	0	0	0	0	0
P18	LP	0	0	0	0	0	0
P16	LP	0	0	0	0	0	0
P14	LP	0	0	0	0	0	0
P19	LP	0	0	0	0	0	0
P22	LP
P21	LP	0	0	0	0	0	0
P20	LP	0	0	0	0	0	0
P17	LP	0	0	0	0	0	0
P24	LP
P25	LP	0	0	0	0	0	0
P23	LP	0	0	0	0	0	0
P26	LP	0	0	0	0	0	0
P27	LP	0	0	0	0	0	0
P29	LP	0	0	0	0	0	0
P30	LP	0	0	0	0	0	0
P31	LP		0
P34	LP	0	0	0	0	0	0
P35	LP	0	0	0	0	0	0
P28	LP	0	0	0	0	0	0
P32	LP
P33	LP
P36	LP	0	0	0	0	0	0
P37	LP	0	0	0	0	0	0
P38	LP	0	0	0	0	0	0
P39	LP	0	0	0	0	0	0
P40	LP	0	0	0	0	0	0
P41	LP	0	0	0	0	0	0
P42	LP	0	0	0	0	0	0
P44	LP	0	0	0	0	0	0
P45	LP	0	0	0	0	0	0
P46	LP	0	0	0	0	0	0
P47	LP	0	0	0	0	0	0
P48	LP	0	0	0	0	0	0
P49	LP	0	0	0	0	0	0
P50	LP	0	0	0	0	0	0
P51	LP	0	0	0	0	0	0
P52	LP	0	0	0	0	0	0
P53	LP	0	0	0	0	0	0
P54	LP	0	0	0	0	0	0
P55	LP	0	0	0	0	0	0
P56	LP	0	0	0	0	0	0
P57	LP	0	0	0	0	0	0
P59	LP	0	0	0	0	0	0
P60	LP	0	0	0	0	0	0
P61	LP	0	0	0	0	0	0
P62	LP	0	0	0	0	0	0
P63	LP	0	0	0	0	0	0
P64	LP	0	0	0	0	0	0
P65	LP	0	0	0	0	0	0
P09	Day 0	0	0	0	0	0	0
P06	Day 0	0	0	0	0	0	0
P10	Day 0	0	0	0	0	0	0
P01	Day 0	0	0	0	0	0	0
P11	Day 0	0	0	0	0	0	0
P13	Day 0	0	0	0	0	0	0
P12	Day 0	0	0	0	0	0	0
P15	Day 0	0	0	0	0	0	0
P18	Day 0	0	0	0	0	0	0
P16	Day 0	0	0	0	0	0	0
P14	Day 0	0	0	0	0	0	0
P19	Day 0	0	0	0	0	0	0
P22	Day 0	0	0	0	0	0	0
P21	Day 0	0	0	0	0	0	0
P20	Day 0	0	0	0	0	0	0
P17	Day 0	0	0	0	0	0	0
P24	Day 0
P25	Day 0	0	0	0	0	0	0
P23	Day 0
P26	Day 0	0	0	0	0	0	0
P27	Day 0	0	0	0	0	0	0
P29	Day 0	0	0	0	0	0	0
P30	Day 0	0	0	0	0	0	0
P31	Day 0
P34	Day 0	0	0	0	0	0	0
P35	Day 0	0	0	0	0	0	0
P28	Day 0	0	0	0	0	0	0
P32	Day 0
P33	Day 0
P36	Day 0	0	0	0	0	0	0
P37	Day 0	0	0	0	0	0	0
P38	Day 0	0	0	0	0	0	0
P39	Day 0	0	0	0	0	0	0
P40	Day 0	0	0	0	0	0	0
P41	Day 0	0	0	0	0	0	0
P42	Day 0	0	0	0	0	0	0
P44	Day 0	0	0	0	0	0	0
P45	Day 0	0	0	0	0	0	0
P46	Day 0	0	0	0	0	0	0
P47	Day 0	0	0	0	0	0	0
P48	Day 0	0	0	0	0	0	0
P50	Day 0	0	0	0	0	0	0
P51	Day 0	0	0	0	0	0	0
P52	Day 0	0	0	0	0	0	0
P53	Day 0	0	0	0	0	0	0
P54	Day 0	0	0	0	0	0	0
P55	Day 0	0	0	0	0	0	0
P56	Day 0	0	0	0	0	0	0
P57	Day 0	0	0	0	0	0	0
P58	Day 0	0	0	0	0	0	0
P59	Day 0	0	0	0	0	0	0
P60	Day 0	0	0	0	0	0	0
P61	Day 0	0	0	0	0	0	0
P62	Day 0	0	0	0	0	0	0
P63	Day 0	0	0	0	0	0	0
P64	Day 0	0	0	0	0	0	0
P65	Day 0	0	0	0	0	0	0
P09	Day 7	47.7	152.163	5	7.60815	94	143.033
P06	Day 7	1.3	1.404	49	0.68796	44	0.61776
P10	Day 7	13	24.44	15	3.666	85	20.774
P01	Day 7	0.8	3.84	18	0.6912	75	2.88
P11	Day 7	14	25.2	7	1.764	92	23.184
P13	Day 7	4.5	4.86	22	1.0692	76	3.6936
P12	Day 7	10.8	12.42	15	1.863	84	10.4328
P15	Day 7	7.1	7.171	30	2.1513	62	4.44602
P18	Day 7	18.4	359.352	24	86.2445	73	262.327
P16	Day 7	2.7	3.294	24	0.79056	72	2.37168
P14	Day 7	21.4	10.058	71	7.14118	24	2.41392
P19	Day 7	15.6	5.928	42	2.48976	55	3.2604
P22	Day 7	47.1	542.592	1	5.42592	98	531.74
P21	Day 7	76.8	188.16	6	11.2896	94	176.87
P20	Day 7	24.1	92.544	15	13.8816	85	78.6624
P17	Day 7	39.8	19.104	19	3.62976	80	15.2832
P24	Day 7
P25	Day 7	23.8	34.034	23	7.82782	76	25.8658
P23	Day 7	13.2	112.86	5	5.643	95	107.217
P26	Day 7	52.9	1077.57	25	269.393	74	797.404
P27	Day 7	13.4	64.99	4	2.5996	95	61.7405
P29	Day 7	2.6	9.776	19	1.85744	79	7.72304
P30	Day 7	55.7	63.498	25	15.8745	72	45.7186
P31	Day 7
P34	Day 7	46.6	542.424	3	16.2727	95	515.303
P35	Day 7	50.7	76.557	35	26.795	63	48.2309
P28	Day 7	20.4	123.42	32	39.4944	67	82.6914
P32	Day 7
P33	Day 7	12.3	12.915	75	9.68625	24	3.0996
P36	Day 7	1	4.83	17	0.8211	80	3.864
P37	Day 7	19.9	2.388	12	0.28656	86	2.05368
P38	Day 7	59.2	629.296	5	31.4648	94	591.538
P39	Day 7	23.2	12.992	38	4.93696	48	6.23616
P40	Day 7	2.7	3.078	10	0.3078	86	2.64708
P41	Day 7	1.5	3.03	34	1.0302	29	0.8787
P42	Day 7	20.6	10.094	32	3.23008	54	5.45076
P44	Day 7	21	5.67	27	1.5309	69	3.9123
P45	Day 7	1.9	0.513	23	0.11799	77	0.39501
P46	Day 7	15.8	12.64	65	8.216	31	3.9184
P47	Day 7	6.9	42.366	7	2.96562	92	38.9767
P48	Day 7	1.6	0.816	53	0.43248	40	0.3264
P49	Day 7	29.2	1.46	8	0.1168	87	1.2702
P50	Day 7	0.3	1.773	0	0	0	0
P52	Day 7	10.9	9.265	57	5.28105	23	2.13095
P53	Day 7	15.4	1.848	25	0.462	68	1.25664
P54	Day 7	43.6	129.492	78	101.004	21	27.1933
P55	Day 7	3.9	6.474	68	4.40232	30	1.9422
P56	Day 7	0.2	0.588	0	0	0	0
P57	Day 7	1	0.83	26	0.2158	22	0.1826
P58	Day 7	0.8	0.496	7	0.03472	87	0.43152
P59	Day 7
P60	Day 7	0.2	0.082	0	0	0	0
P61	Day 7	0.4	0.384
P62	Day 7	0.9	2.241	5	0.11205	82	1.83762
P63	Day 7	14.9	17.135	56	9.5956	43	7.36805
P64	Day 7	0.1	0.132
P65	Day 7	12.6	7.56	46	3.4776	46	3.4776
P09	Day 14	30.4	108.528	5	5.4264	95	103.102
P06	Day 14	0.6	0.702	24	0.16848	60	0.4212
P10	Day 14	7.3	8.687	10	0.8687	88	7.64456
P01	Day 14	0.3	1.674
P11	Day 14	8.2	34.44	2	0.6888	97	33.4068
P13	Day 14	4.7	7.849	9	0.70641	89	6.98561
P12	Day 14	27.4	99.462	4	3.97848	93	92.4997
P15	Day 14	2	7.12	21	1.4952	75	5.34
P18	Day 14	16.2	188.568	15	28.2852	83	156.511
P16	Day 14	5.5	11.715	40	4.686	57	6.67755
P14	Day 14	16	30.4	50	15.2	45	13.68
P19	Day 14	69.1	238.395	27	64.3667	72	171.644
P22	Day 14	32.1	342.507	1	3.42507	98	335.657
P21	Day 14	74	659.34	6	39.5604	92	606.593
P20	Day 14	32.4	204.12	10	20.412	89	181.667
P17	Day 14	65.6	186.96	5	9.348	94	175.742
P24	Day 14
P25	Day 14	27.8	79.23	15	11.8845	85	67.3455
P23	Day 14	14.4	119.232	5	5.9616	95	113.27
P26	Day 14	46	495.88	29	143.805	71	352.075
P27	Day 14	9.1	51.87	4	2.0748	95	49.2765
P30	Day 14	51.1	145.635	14	20.3889	82	119.421
P31	Day 14
P34	Day 14	29.4	203.742	3	6.11226	97	197.63
P35	Day 14	14.3	19.591	29	5.68139	70	13.7137
P28	Day 14	18.4	69	29	20.01	70	48.3
P32	Day 14
P33	Day 14	16.4	28.372	33	9.36276	66	18.7255
P37	Day 14	35.3	8.119	7	0.56833	92	7.46948
P38	Day 14	50	485	4	19.4	96	465.6
P39	Day 14	21.7	58.59	3	1.7577	95	55.6605
P40	Day 14	52.8	816.816	46	375.735	53	432.912
P42	Day 14	32.6	108.558	57	61.8781	40	43.4232
P44	Day 14	41.4	144.072	29	41.7809	69	99.4097
P45	Day 14	7.6	16.644	10	1.6644	86	14.3138
P46	Day 14	35.2	202.752	44	89.2109	54	109.486
P49	Day 14	97.7	8011.4	4	320.456	96	7690.94
P50	Day 14	25.8	255.42	54	137.927	45	114.939
P51	Day 14	45.1	257.07	11	28.2777	86	221.08
P52	Day 14	64.4	1083.85	40	433.541	56	606.957
P53	Day 14	88.8	870.24	29	252.37	70	609.168
P54	Day 14	82	3690	57	2103.3	42	1549.8
P55	Day 14	72.7	926.198	60	555.719	39	361.217
P56	Day 14	65.9	904.148	20	180.83	80	723.318
P57	Day 14	14.8	20.128	46	9.25888	49	9.86272
P59	Day 14
P60	Day 14	6.4	13.824	53	7.32672	45	6.2208
P61	Day 14	68.6	1411.79	73	1030.61	26	367.065
P62	Day 14	53.7	537.537	13	69.8798	73	392.402
P63	Day 14	82.1	1586.17	19	301.373	76	1205.49
P64	Day 14	0.1	0.198
P65	Day 14	56.7	96.957	44	42.6611	53	51.3872
P09	Day 30	1.4	6.272	3	0.18816	86	5.39392
P06	Day 30	0.3	0.333
P10	Day 30	0.4	1.328
P01	Day 30	0.1	0.651
P11	Day 30	4.3	16.512	2	0.33024	97	16.0166
P13	Day 30	0.8	0.968
P12	Day 30	95	1034.55	2	20.691	87	900.058
P15	Day 30	0.9	4.14	19	0.7866	71	2.9394
P18	Day 30	11	62.7	10	6.27	89	55.803
P16	Day 30	1.8	1.422	10	0.1422	56	0.79632
P14	Day 30	17.3	15.916	37	5.88892	49	7.79884
P19	Day 30	1.5	19.11	30	5.733	70	13.377
P22	Day 30	6.3	19.215	1	0.19215	97	18.6385
P21	Day 30	50.3	265.584	6	15.935	94	249.649
P20	Day 30	9.9	34.65	9	3.1185	91	31.5315
P17	Day 30	45	47.7	5	2.385	95	45.315
P24	Day 30
P25	Day 30	7.1	7.526	7	0.52682	91	6.84866
P23	Day 30	1.6	18.928	2	0.37856	82	15.521
P26	Day 30	33.3	484.515	28	135.664	72	348.851
P27	Day 30	1.3	7.826	7	0.54782	89	6.96514
P29	Day 30	0.4	2.212
P30	Day 30	52.9	128.547	11	14.1402	88	113.121
P31	Day 30
P34	Day 30	21.9	140.16	4	5.6064	96	134.554
P35	Day 30	6.8	5.236	30	1.5708	69	3.61284
P28	Day 30	20.4	24.684	27	6.66468	72	17.7725
P32	Day 30
P33	Day 30	3.5	24.64	32	7.8848	68	16.7552
P36	Day 30	0.7	2.597	41	1.06477	59	1.53223
P37	Day 30	0.4	0.248	0	0	0	0
P38	Day 30	28	219.24	2	4.3848	98	214.855
P39	Day 30	0.4	1.056	0	0	0	0
P40	Day 30
P41	Day 30	9.4	58.656	44	25.8086	51	29.9146
P42	Day 30	5	31.85	35	11.1475	56	17.836
P43	Day 30	0	0	0	0	0	0
P44	Day 30	14.6	29.492	57	16.8104	38	11.207
P44	Day 30	3.2	24.576	28	6.88128	57	14.0083
P46	Day 30	7.6	21.204	39	8.26956	60	12.7224
P47	Day 30	0.2	1.458	0	0	0	0
P48	Day 30	14.1	62.04	61	37.8444	20	12.408
P49	Day 30	84.3	2336.8	2	46.7359	97	2266.69
P50	Day 30	1.2	6.72	39	2.6208	47	3.1584
P51	Day 30	20.2	70.7	29	20.503	69	48.783
P52	Day 30	0.1	0.44	0	0	0	0
P53	Day 30	64.9	103.84	28	29.0752	71	73.7264
P54	Day 30	51.9	498.24	40	199.296	54	269.05
P55	Day 30	8.8	17.6	48	8.448	47	8.272
P56	Day 30	14.6	47.45	24	11.388	72	34.164
P57	Day 30	57.6	330.624	20	66.1248	75	247.968
P58	Day 30	91	3873.87	73	2827.93	27	1045.94
P59	Day 30
P60	Day 30	2.2	4.95	22	1.089	71	3.5145
P63	Day 30	40.2	151.152	14	21.1613	86	129.991
P64	Day 30	0.4	0.708
P65	Day 30	13.2	18.084	57	10.3079	38	6.87192
P09	Day 100	0	0
P06	Day 100	0.5	1.15	4	0.046	7	0.0805
P10	Day 100	0.1	0.36
P01	Day 100	0.1	1.17
P11	Day 100	0	0
P12	Day 100	80	228	5	11.4	94	214.32
P15	Day 100	0.1	0.474
P18	Day 100	2.2	15.312	8	1.22496	90	13.7808
P14	Day 100	1.2	2.544	22	0.55968	73	1.85712
P19	Day 100	0	0
P22	Day 100	0	0
P21	Day 100	0.6	3.648	4	0.14592	96	3.50208
P20	Day 100	0	0
P17	Day 100	16.8	8.736	32	2.79552	52	4.54272
P24	Day 100	0
P25	Day 100	0.2	0.2
P23	Day 100	0	0	0	0	0	0
P26	Day 100	3.1	53.01	25	13.2525	75	39.7575
P27	Day 100	0
P30	Day 100	0	0	0	0	0	0
P31	Day 100
P34	Day 100	1.6	3.2	9	0.288	72	2.304
P35	Day 100	0	0	0	0	0	0
P28	Day 100	5.9	31.506	31	9.76686	68	21.4241
P32	Day 100	9.4	72.944	18	13.1299	81	59.0846
P33	Day 100	0.5	19.065	8	1.5252	92	17.5398
P36	Day 100	0.1	0.741	0	0	0	0
P37	Day 100	0	0	0	0	0	0
P38	Day 100	0.1	0	0	0	0	0
P39	Day 100	0.1	0	0	0	0	0
P40	Day 100	24.8	130.944	30	39.2832	66	86.423
P41	Day 100	0	0	0	0	0	0
P42	Day 100	0	0	0	0	0	0
P44	Day 100	2	5.38	53	2.8514	33	1.7754
P45	Day 100	0.8	6.336	28	1.77408	56	3.54816
P48	Day 100	0	0	0	0	0	0
P49	Day 100	77.8	1155.33	3	34.6599	97	1120.67
P51	Day 100	2.3	13.363	30	4.0089	43	5.74609
P52	Day 100	0.1	1.118	0	0	0	0
P53	Day 100
P54	Day 100	0	0	0	0	0	0
P55	Day 100	0	0	0	0	0	0
P56	Day 100	1.3	9.152	13	1.18976	86	7.87072
P58	Day 100	88.6	1616.06	57	921.156	42	678.747
P61	Day 100	6.4	36.48	25	9.12	75	27.36
P64	Day 100	0	0	0	0	0	0

## Sheet: Suppl_Table_3
Demux strategy: How the samples were demultiplexed after Souporcell. pre_Tec/Tal (column Time point group): samples sequenced before bridging therapy with Teclistamab/Talquetamab ASCT (column Time point group): autologous stem cell transplant (befor CAR treatment) Notes on sequencing run 2: 1) The mean hashtag expression was used to associate the clusters with the sample ID. You cannot use the me…
Sample ID	Patient ID	FASTQ file name	Multiplexed	Demux strategy	Cells.after.thawing.(x106)	Viability.after.thawing.(%)	Viability.after.dead.cell.removal.(%)	Run	No. of cells before QC filtering	No. of cells after QC filtering	% Passed cells (after QC/before QC)	Time point group	Days since CAR	Source	Product	Infusions	Analyzed in this study
MXMERZ002A_01	P01	MXMERZ002A_01	no		1.91	32.2	54.5	Run 1	5452	2418	44.4	Late	30	BM	ide	first infusion	no
MXMERZ002A_02	P01	MXMERZ002A_02	no		0.46	40.4	51.6	Run 1	5204	2876	55.3	Late	30	PB	ide	first infusion	yes
MXMERZ002A_03	P07	MXMERZ002A_03	no		0.41	69.1	76.6	Run 1	6567	5321	81	LP	-83	PB	cilta	first infusion	yes
MXMERZ002A_04	P07	MXMERZ002A_04	no		3.88	61.4	83	Run 1	5696	2751	48.3	Late	27	BM	cilta	first infusion	no
MXMERZ002A_05	P11	MXMERZ002A_05	no		1.29	75.1	94.3	Run 1	9528	7363	77.3	LP	-76	PB	ide	first infusion	yes
MXMERZ002A_06	P12	MXMERZ002A_06	no		0.52	81.1	80.2	Run 1	8971	6286	70.1	Late	28	PB	ide	first infusion	yes
MXMERZ002A_07	P06	MXMERZ002A_07	no		0.32	75.3	79.35	Run 1	7586	4697	61.9	LP	-55	PB	ide	first infusion	yes
MXMERZ002A_08	P08	MXMERZ002A_08	no		1.89	68.5	82.7	Run 1	9103	4873	53.5	Late	27	BM	cilta	first infusion	no
MXMERZ002A_09	P09	MXMERZ002A_09	no		1.67	92.7	86.7	Run 1	10320	7510	72.8	Late	44	PB	ide	first infusion	yes
MXMERZ002A_10	P10	MXMERZ002A_10	no		2.54	40.3	67.4	Run 1	8539	4495	52.6	Very Late	79	BM	ide	first infusion	no
MXMERZ002A_11	P11	MXMERZ002A_11	no		1	84.5	81.75	Run 1	9273	7341	79.2	Late	24	PB	ide	first infusion	yes
MXMERZ002A_12	P14	MXMERZ002A_12	no		0.04	50	81.35	Run 1	8018	5822	72.6	LP	-56	PB	ide	first infusion	yes
MXMERZ002A_13	P01	MXMERZ002A_13	no		0.88	92.3	89.95	Run 1	9618	7100	73.8	LP	-49	PB	ide	first infusion	yes
MXMERZ002A_14	P06	MXMERZ002A_14	no		1.22	81.4	85.25	Run 1	11085	8478	76.5	Late	31	PB	ide	first infusion	yes
MXMERZ002A_15	P09	MXMERZ002A_15	no		0.08	86.1	91.75	Run 1	4796	3974	82.9	LP	-58	PB	ide	first infusion	yes
MXMERZ002A_16	P12	MXMERZ002A_16	no		0.34	73.8	73.1	Run 1	3489	1856	53.2	Very Late	63	BM	ide	first infusion	no
MXMERZ002A_17	P13	MXMERZ002A_17	no		0.25	91.7	79.85	Run 1	7503	5126	68.3	LP	-54	PB	ide	first infusion	yes
MXMERZ002A_18	P14	MXMERZ002A_18	no		1.04	78.5	79.2	Run 1	8439	6360	75.4	Late	30	PB	ide	first infusion	yes
MXMERZ002A_19	P08	MXMERZ002A_19	no		0.24	71.9	73.3	Run 1	2286	1665	72.8	LP	-76	PB	cilta	first infusion	yes
MXMERZ002A_20	P08	MXMERZ002A_20	no		2.76	87.8	88.05	Run 1	10166	4826	47.5	Late	27	PB	cilta	first infusion	yes
MXMERZ002A_21	P09	MXMERZ002A_21	no		0.97	66.1	80.55	Run 1	5754	2624	45.6	Late	44	BM	ide	first infusion	no
MXMERZ002A_22	P10	MXMERZ002A_22	no		0.22	67.3	79.2	Run 1	2706	2032	75.1	LP	-126	PB	ide	first infusion	yes
MXMERZ002A_23	P10	MXMERZ002A_23	no		0.54	82.2	84.3	Run 1	8523	6490	76.1	Very Late	79	PB	ide	first infusion	yes
MXMERZ002A_24	P12	MXMERZ002A_24	no		1.06	87.2	84	Run 1	9695	7279	75.1	LP	-57	PB	ide	first infusion	yes
MXMERZ002A_25	P13	MXMERZ002A_25	no		0.16	62.2	77.5	Run 1	1559	1148	73.6	Late	30	PB	ide	first infusion	yes
P30_1_PB_LP	P30	T1_Lane_1	no		0.46	62	68.7	Run 2	3289	1910	58.1	LP	-152	PB	ide	first infusion	yes
P20_1_PB_L	P20	T1_Lane_2	no		0.71	80.4	72.8	Run 2	3827	2681	70.1	Late	30	PB	ide	first infusion	yes
P14_1_PB_VL	P14	T1_Lane_3	yes	w	0.6	75.2	74.7	Run 2	4100	3240	79	Very Late	100	PB	ide	first infusion	yes
P15_1_PB_VL	P15	T1_Lane_3	yes	m	0.77	78.7	74.7	Run 2	4169	3031	72.7	Very Late	93	PB	ide	first infusion	yes
P25_1_PB_LP	P25	T1_Lane_4	yes	w	0.27	79.7	71.8	Run 2	3438	2375	69.1	LP	-76	PB	ide	first infusion	yes
P30_1_PB_L	P30	T1_Lane_4	yes	m	0.82	81.5	71.8	Run 2	3717	2074	55.8	Late	29	PB	ide	first infusion	yes
P18_1_PB_LP	P18	T1_Lane_5	yes	m	3.25	87.1	80.5	Run 2	3876	2574	66.4	LP	-91	PB	ide	first infusion	yes
P33_1_PB_pre_Tec	P33	T1_Lane_5	yes	w	3.05	90	80.5	Run 2	3895	2602	66.8	pre_Tec		PB	ide	first infusion	no
P24_1_PB_VL	P24	T1_Lane_6	yes	w	0.59	75	75.8	Run 2	3831	2724	71.1	Very Late	97	PB	ide	first infusion	yes
P26_1_PB_LP	P26	T1_Lane_6	yes	m	1.21	86	75.8	Run 2	4658	2697	57.9	LP	-77	PB	ide	first infusion	yes
P22_1_PB_pre_Tec	P22	T2_Lane_1	no		2.47	72.8	67.6	Run 2	4762	3149	66.1	pre_Tec		PB	ide	first infusion	no
P26_1_PB_L	P26	T2_Lane_2	no		1.69	89.8	84.2	Run 2	4552	3295	72.4	Late	22	PB	ide	first infusion	yes
P21_1_PB_LP	P21	T2_Lane_3	yes	m	0.42	71	79.3	Run 2	4808	3339	69.4	LP	-83	PB	ide	first infusion	yes
P33_1_PB_L	P33	T2_Lane_3	yes	w	2.05	86.2	79.3	Run 2	5291	4077	77.1	Late	29	PB	ide	first infusion	yes
P16_1_PB_LP	P16	T2_Lane_4	yes	w	0.67	69.8	77.6	Run 2	3892	2646	68	LP	-56	PB	ide	first infusion	yes
P31_1_PB_L	P31	T2_Lane_4	yes	m	1.04	85.8	77.6	Run 2	4680	3656	78.1	Late	21	PB	ide	first infusion	yes
P21_1_PB_VL	P21	T2_Lane_5	yes	m	1.18	79.2	71.4	Run 2	4700	3470	73.8	Very Late	119	PB	ide	first infusion	yes
P27_1_PB_LP	P27	T2_Lane_5	yes	w	0.76	86.2	71.4	Run 2	4599	3304	71.8	LP	-55	PB	ide	first infusion	yes
P15_1_PB_L	P15	T2_Lane_6	yes	m	0.48	93	94.7	Run 2	5246	4175	79.6	Late	26	PB	ide	first infusion	yes
P28_1_PB_VL	P28	T2_Lane_6	yes	w	0.46	90.7	94.7	Run 2	5633	4730	84	Very Late	100	PB	ide	first infusion	yes
P23_1_PB_L	P23	T3_Lane_1	yes	m	0.95	88.9	80.4	Run 2	3728	2794	74.9	Late	30	PB	ide	first infusion	yes
P32_1_PB_LP	P32	T3_Lane_1	yes	w	0.49	81	80.4	Run 2	3626	2305	63.6	LP	-194	PB	ide	first infusion	yes
P17_1_PB_LP	P17	T3_Lane_2	yes	m	0.7	73.5	77.4	Run 2	4596	3731	81.2	LP	-68	PB	ide	first infusion	yes
P24_1_PB_LP	P24	T3_Lane_2	yes	w	1.19	86.8	77.4	Run 2	5062	3586	70.8	LP	-77	PB	ide	first infusion	yes
P11_1_PB_VL	P11	T3_Lane_3	yes	m	1.3	69.8	72.7	Run 2	1604	934	58.2	Very Late	104	PB	ide	first infusion	yes
P32_1_PB_L	P32	T3_Lane_3	yes	w	1.8	89	72.7	Run 2	6453	5161	80	Late	29	PB	ide	first infusion	yes
P22_1_PB_L	P22	T3_Lane_4	no		1.77	79	79.5	Run 2	5885	4346	73.8	Late	48	PB	ide	first infusion	yes
P09_1_PB_VL	P09	T3_Lane_5	yes	w	0.43	86.1	74.3	Run 2	5523	4327	78.3	Very Late	105	PB	ide	first infusion	yes
P31_1_PB_LP	P31	T3_Lane_5	yes	m	0.11	87.2	74.3	Run 2	4049	2597	64.1	LP	-50	PB	ide	first infusion	yes
P17_1_PB_L	P17	T4_Lane_1	no		0.52	55.3	71.5	Run 2	3178	2102	66.1	Late	35	PB	ide	first infusion	yes
P19_1_PB_VL	P19	T4_Lane_2	no		0.63	61.1	78.7	Run 2	1762	968	54.9	Very Late	84	PB	ide	first infusion	yes
P22_1_PB_LP	P22	T4_Lane_3	yes	m	7.16	49.9	74	Run 2	3183	1939	60.9	LP	-111	PB	ide	first infusion	yes
P28_1_PB_LP	P28	T4_Lane_3	yes	w	1.54	84.9	74	Run 2	4404	2938	66.7	LP	-181	PB	ide	first infusion	yes
P19_1_PB_LP	P19	T4_Lane_4	yes	m	0.2	51.1	70.2	Run 2	2278	1345	59	LP	-86	PB	ide	first infusion	yes
P25_1_PB_L	P25	T4_Lane_4	yes	w	0.68	72.8	70.2	Run 2	4197	2511	59.8	Late	28	PB	ide	first infusion	yes
P19_1_PB_L	P19	T4_Lane_5	yes	m	1.21	73.2	67.5	Run 2	3054	1874	61.4	Late	30	PB	ide	first infusion	yes
P25_1_PB_VL	P25	T4_Lane_5	yes	w	0.3	70.4	67.5	Run 2	4400	2701	61.4	Very Late	98	PB	ide	first infusion	yes
P24_1_PB_pre_Tec	P24	T4_Lane_6	yes	w	0.32	44.7	71.8	Run 2	2442	1702	69.7	pre_Tec		PB	ide	first infusion	no
P26_1_PB_VL	P26	T4_Lane_6	yes	m	1.32	79	71.8	Run 2	3614	2435	67.4	Very Late	98	PB	ide	first infusion	yes
P15_1_PB_LP	P15	T5_Lane_1	yes	TCR	0.39	63.4	64.9	Run 2	2583	1353	52.4	LP	-56	PB	ide	first infusion	yes
P23_1_PB_VL	P23	T5_Lane_1	yes	TCR	0.5	75.4	73	Run 2	6111	2688	44	Very Late	97	PB	ide	first infusion	yes
P23_1_PB_VL	P23	T5_Lane_2	no		0.5	75.4	73	Run 2	6111	2688	44	Very Late	97	PB	ide	first infusion	yes
P23_1_PB_LP	P23	T5_Lane_3	yes	m	0.31	82.2	82.7	Run 2	3513	2294	65.3	LP	-63	PB	ide	first infusion	yes
P33_1_PB_LP	P33	T5_Lane_3	yes	w	1.97	90.1	82.7	Run 2	3662	2530	69.1	LP	-235	PB	ide	first infusion	yes
P18_1_PB_L	P18	T5_Lane_4	yes	m	0.6	78.7	78.6	Run 2	4713	2685	57	Late	35	PB	ide	first infusion	yes
P27_1_PB_VL	P27	T5_Lane_4	yes	w	1.26	80.3	78.6	Run 2	4395	3053	69.5	Very Late	107	PB	ide	first infusion	yes
P20_1_PB_LP	P20	T5_Lane_5	yes	m	0.2	68.8	62.2	Run 2	1785	1013	56.8	LP	-55	PB	ide	first infusion	yes
P32_1_PB_pre_Tec	P32	T5_Lane_5	yes	w	1.13	77.7	62.2	Run 2	3346	1841	55	pre_Tec		PB	ide	first infusion	no
P16_1_PB_L	P16	T5_Lane_6	yes	w	0.33	64.6	56.4	Run 2	2258	1197	53	Late	29	PB	ide	first infusion	yes
P17_1_PB_VL	P17	T5_Lane_6	yes	m	0.32	76.3	56.4	Run 2	2249	1352	60.1	Very Late	113	PB	ide	first infusion	yes
P34_1_PB_LP	P34	T1-P1	yes	m	1.3	86.3	80.6	Run 3	5150	3702	71.9	LP	-62	PB	ide	first infusion	yes
P43_1_PB_ASCT	P43	T1-P1	yes	w	71.8	59	42	Run 3	2056	550	26.8	ASCT		PB	cilta	first infusion	no
P08_1_PB_VL	P08	T1-P2	yes	m	1.4	83.9	79.3	Run 3	5047	3528	69.9	Very Late	169	PB	cilta	first infusion	yes
P42_1_PB_L	P42	T1-P2	yes	w	0.5	83.6	76.8	Run 3	4290	3065	71.4	Late	28	PB	cilta	first infusion	yes
P48_1_PB_L	P48	T1-P3	no		1	90	80.2	Run 3	5772	3736	64.7	Late	52	PB	cilta	first infusion	yes
P40_1_PB_L	P40	T1-P4	yes	m	0.3	91	86.4	Run 3	5982	2988	49.9	Late	28	PB	cilta	first infusion	yes
P41_1_PB_LP	P41	T1-P4	yes	w	0.8	68.5	73.2	Run 3	3700	1933	52.2	LP	-68	PB	cilta	first infusion	yes
P36_1_PB_VL	P36	T1-P5	yes	w	1.7	90.1	87.9	Run 3	5595	3760	67.2	Very Late	85	PB	ide	first infusion	yes
P52_1_PB_LP	P52	T1-P5	yes	m	0.5	90	76.4	Run 3	4477	2616	58.4	LP	-139	PB	cilta	first infusion	yes
P18_1_PB_ASCT	P18	T2-P1	yes	m	169	61.8	23	Run 3	870	417	47.9	ASCT		PB	ide	first infusion	no
P32_1_PB_VL	P32	T2-P1	yes	w	1.1	82.1	84.1	Run 3	6322	4627	73.2	Very Late	99	PB	ide	first infusion	yes
P40_1_PB_VL	P40	T2-P2	yes	m	1	87	85.6	Run 3	5880	4487	76.3	Very Late	100	PB	cilta	first infusion	yes
P43_1_PB_LP	P43	T2-P2	yes	w	0.9	79.8	70.5	Run 3	5775	3630	62.9	LP	-64	PB	cilta	first infusion	yes
P35_1_PB_VL	P35	T2-P3	yes	w		97	90.6	Run 3	7149	5288	74	Very Late	104	PB	ide	first infusion	yes
P37_1_PB_LP	P37	T2-P3	yes	m	0.8	76	63.4	Run 3	3985	1873	47	LP	-97	PB	ide	first infusion	yes
P09_1_PB_ASCT	P09	T2-P4	yes	w	105	50.1	26.6	Run 3	720	201	27.9	ASCT		PB	ide	first infusion	no
P49_1_PB_L	P49	T2-P4	yes	m	1	89	77.9	Run 3	6771	3667	54.2	Late	30	PB	cilta	first infusion	yes
P30_1_PB_ASCT	P30	T2-P5	yes	m	100	48.2	21.4	Run 3	2223	800	36	ASCT		PB	ide	first infusion	no
P51_1_PB_L	P51	T2-P5	yes	w	0.5	86.1	72.1	Run 3	4693	2885	61.5	Late	24	PB	cilta	first infusion	yes
P41_1_PB_VL	P41	T2-S11	no		1.1	87.9	79.5	Run 3	7000	4954	70.8	Very Late	114	PB	cilta	first infusion	yes
P33_1_PB_VL	P33	T3-P1	no		4.6	94	89.8	Run 3	6462	5144	79.6	Very Late	107	PB	ide	first infusion	yes
P34_1_PB_L	P34	T3-P2	yes	m	1.4	86.9	78	Run 3	5370	3923	73.1	Late	29	PB	ide	first infusion	yes
P44_1_PB_LP	P44	T3-P2	yes	w	0.9	79.8	73.8	Run 3	5651	3468	61.4	LP	-70	PB	cilta	first infusion	yes
P46_1_PB_L	P46	T3-P3	yes	w	0.9	91	83.6	Run 3	5213	1559	29.9	Late	28	PB	cilta	first infusion	yes
P49_1_PB_LP	P49	T3-P3	yes	m	0.2	86.8	85.1	Run 3	15670	1243	7.9	LP	-76	PB	cilta	first infusion	yes
P39_1_PB_L	P39	T3-P4	yes	m	0.7	77.3	86	Run 3	5613	4307	76.7	Late	35	PB	ide	first infusion	yes
P51_1_PB_LP	P51	T3-P4	yes	w	1	88.5	85.6	Run 3	6166	4959	80.4	LP	-63	PB	cilta	first infusion	yes
P37_1_PB_L	P37	T4-P1	yes	m	0.4	75.5	70	Run 3	3498	2311	66.1	Late	28	PB	ide	first infusion	yes
P48_1_PB_LP	P48	T4-P1	yes	w	0.4	76.3	69.2	Run 3	4668	2906	62.3	LP	-62	PB	cilta	first infusion	yes
P30_1_PB_VL	P30	T4-P2	yes	m	0.8	78.1	75.1	Run 3	10918	6373	58.4	Very Late	91	PB	ide	first infusion	yes
P32_1_PB_ASCT	P32	T4-P2	yes	w	149	46.5	16.3	Run 3	1180	275	23.3	ASCT		PB	ide	first infusion	no
P01_1_PB_VL	P01	T4-P3	yes	m	8.3	74.3	37.4	Run 3	4747	1844	38.8	Very Late	100	PB	ide	first infusion	yes
P25_1_PB_ASCT	P25	T4-P3	yes	w	108	55.1	40.2	Run 3	2427	868	35.8	ASCT		PB	ide	first infusion	no
P36_1_PB_L	P36	T4-P4	yes	w	0.7	68.9	63.1	Run 3	4724	3231	68.4	Late	28	PB	ide	first infusion	yes
P38_1_PB_LP	P38	T4-P4	yes	m	1.6	75.6	69.3	Run 3	5322	3618	68	LP	-70	PB	ide	first infusion	yes
P43_1_PB_L	P43	T4-S9	no		0.5	83.8	70.6	Run 3	6553	3151	48.1	Late	30	PB	cilta	first infusion	yes
P38_1_PB_L	P38	T5-P1	yes	m	0.7	83.6	84.7	Run 3	5572	3704	66.5	Late	28	PB	ide	first infusion	yes
P46_1_PB_LP	P46	T5-P1	yes	w	0.4	85.7	89.7	Run 3	7789	5093	65.4	LP	-68	PB	cilta	first infusion	yes
P31_1_PB_VL	P31	T5-P2	yes	m	1.5	52.1	52	Run 3	1962	1328	67.7	Very Late	98	PB	ide	first infusion	yes
P36_1_PB_LP	P36	T5-P2	yes	w	1.1	86.8	82.2	Run 3	6401	4069	63.6	LP	-55	PB	ide	first infusion	yes
P35_1_PB_L	P35	T5-P3	yes	w	0.3	80.5	75.6	Run 3	4969	3105	62.5	Late	31	PB	ide	first infusion	yes
P45_1_PB_LP	P45	T5-P3	yes	m	0.8	84.9	69.4	Run 3	6648	3569	53.7	LP	-62	PB	cilta	first infusion	yes
P24_1_PB_ASCT	P24	T5-P4	yes	w	171	50.4	27.7	Run 3	1803	769	42.7	ASCT		PB	ide	first infusion	no
P34_1_PB_VL	P34	T5-P4	yes	m	0.7	78.4	74.9	Run 3	6530	4758	72.9	Very Late	107	PB	ide	first infusion	yes
P06_1_PB_VL	P06	T5-P5	yes	w	0.7	78.3	84	Run 3	8821	6946	78.7	Very Late	105	PB	ide	first infusion	yes
P40_1_PB_ASCT	P40	T5-P5	yes	m	95.3	42.5	30	Run 3	1029	307	29.8	ASCT		PB	cilta	first infusion	no
P44_1_PB_L	P44	T6-P1	yes	w	0.4	68.9	67.9	Run 3	3180	2282	71.8	Late	29	PB	cilta	first infusion	yes
P52_1_PB_pre_Tal	P52	T6-P1	yes	m	0.7	69.9	82	Run 3	6753	4466	66.1	pre_Tal		PB	cilta	first infusion	no
P41_1_PB_L	P41	T6-P2	yes	w	0.8	75.4	68.3	Run 3	5478	3490	63.7	Late	30	PB	cilta	first infusion	yes
P45_1_PB_L	P45	T6-P2	yes	m	1.2	87.2	79.5	Run 3	8197	5237	63.9	Late	28	PB	cilta	first infusion	yes
P39_1_PB_LP	P39	T6-P3	yes	m	0.2	76.3	73.2	Run 3	7019	4208	60	LP	-57	PB	ide	first infusion	yes
P50_1_PB_L	P50	T6-P3	yes	w	0.4	80.7	74.5	Run 3	6728	3637	54.1	Late	28	PB	cilta	first infusion	yes
P50_1_PB_LP	P50	T6-S9	no		0.2	54.5	75.3	Run 3	2370	1624	68.5	LP	-77	PB	cilta	first infusion	yes
P20_2_PB_LP	P20	T1-A	yes	m	0.65	58.7	83.2	Run 4	3073	2155	70.1	LP	-63	PB	cilta	second infusion	no
P42_1_PB_VL	P42	T1-A	yes	w	0.72	63.2	82.9	Run 4	4092	2758	67.4	Very Late	100	PB	cilta	first infusion	yes
P44_1_PB_VL	P44	T1-B	yes	w	0.86	44.1	63.1	Run 4	2441	1802	73.8	Very Late	86	PB	cilta	first infusion	yes
P58_1_PB_VL	P58	T1-B	yes	m	2.3	86.2	75.2	Run 4	5498	3496	63.6	Very Late	100	PB	cilta	first infusion	yes
P53_1_PB_LP	P53	T1-C	yes	w	0.63	76	82.3	Run 4	5088	3739	73.5	LP	-91	PB	cilta	first infusion	yes
P63_1_PB_L	P63	T1-C	yes	m	0.79	51.9	77.5	Run 4	3820	2078	54.4	Late	27	PB	cilta	first infusion	yes
P55_1_PB_L	P55	T1-D	yes	m	1.04	72.1	84.8	Run 4	4385	3342	76.2	Late	28	PB	cilta	first infusion	yes
P56_1_PB_LP	P56	T1-D	yes	w	1.02	71	87.1	Run 4	5525	3560	64.4	LP	-117	PB	cilta	first infusion	yes
P62_1_PB_L	P62	T1-F	no		0.5	13.4	61.5	Run 4	2238	675	30.2	Late	50	PB	cilta	first infusion	yes
P51_1_PB_VL	P51	T2-A	yes	w	0.57	85.2	79.1	Run 4	6943	3938	56.7	Very Late	106	PB	cilta	first infusion	yes
P57_1_PB_LP	P57	T2-A	yes	m	0.37	58	75.4	Run 4	4494	3040	67.6	LP	-71	PB	cilta	first infusion	yes
P45_1_PB_VL	P45	T2-B	yes	m	0.38	77.5	82.2	Run 4	6287	2891	46	Very Late	91	PB	cilta	first infusion	yes
P56_1_PB_L	P56	T2-B	yes	w	0.55	71	79.8	Run 4	4005	1878	46.9	Late	31	PB	cilta	first infusion	yes
P63_1_PB_LP	P63	T2-C	no		1.72	67.1	68.3	Run 4	3033	1806	59.5	LP	-70	PB	cilta	first infusion	yes
P53_1_PB_L	P53	T2-D	yes	w	0.39	88	69	Run 4	4482	3041	67.8	Late	30	PB	cilta	first infusion	yes
P55_1_PB_LP	P55	T2-D	yes	m	0.82	72.8	80.6	Run 4	4051	3050	75.3	LP	-86	PB	cilta	first infusion	yes
P60_1_PB_LP	P60	T2-E	yes	m	0.78	62.5	80.9	Run 4	3064	2167	70.7	LP	-71	PB	cilta	first infusion	yes
P61_1_PB_L	P61	T2-E	yes	w	0.87	77.3	77.7	Run 4	3541	2400	67.8	Late	52	PB	cilta	first infusion	yes
P56_1_PB_VL	P56	T3-A	yes	w	0.5	74.8	70.8	Run 4	3877	1925	49.7	Very Late	85	PB	cilta	first infusion	yes
P62_1_PB_LP	P62	T3-A	yes	m	0.66	68.2	74.7	Run 4	2968	1597	53.8	LP	-62	PB	cilta	first infusion	yes
P57_1_PB_L	P57	T3-B	yes	m	0.29	57.4	64	Run 4	3212	1694	52.7	Late	60	PB	cilta	first infusion	yes
P61_1_PB_LP	P61	T3-B	yes	w	0.62	78.2	63.7	Run 4	2648	1590	60	LP	-56	PB	cilta	first infusion	yes
P49_1_PB_VL	P49	T3-C	yes	m	1.54	87.1	82.6	Run 4	6382	4263	66.8	Very Late	93	PB	cilta	first infusion	yes
P65_1_PB_LP	P65	T3-C	yes	w	0.59	59	66.9	Run 4	2939	2062	70.2	LP	-69	PB	cilta	first infusion	yes
P53_1_PB_VL	P53	T3-D	yes	w	0.8	73.5	70.8	Run 4	1767	1268	71.8	Very Late	113	PB	cilta	first infusion	yes
P60_1_PB_L	P60	T3-D	yes	m	0.62	65.5	72.7	Run 4	2057	1065	51.8	Late	29	PB	cilta	first infusion	yes
P58_1_PB_L	P58	T3-E	yes	m	1.84	81.6	75.1	Run 4	3995	2033	50.9	Late	23	PB	cilta	first infusion	yes
P59_1_PB_LP	P59	T3-E	yes	w	1.56	72.2	84.7	Run 4	6289	4726	75.1	LP	-64	PB	cilta	first infusion	yes

## Sheet: Suppl_Table_4
FASTQ file name	Multiplexed	Patient_2	Run	Valid barcodes (%)	Valid UMIs (%)	Confidently mapped to transcriptome (%)	Confidently mapped reads in cells (%)	Median genes per cell	Median reads per cell	Median UMI counts per cell	No. of valid cell barcodes before QC filtering	Valid barcodes (%)	Valid UMIs (%)	Fraction antibody reads (%)	Fraction antibody reads usable (%)	Mean reads per cell	Mean antibody reads usable per cell	Median UMI counts per cell	No. of cells annotated as T cells	Valid barcodes (%)	Mean used reads per cell	Cells with productive V-J spanning pair (%)	Reads mapped to any V(D)J gene (%)	No. of cells annotated as B/Plasma cells	Valid barcodes (%)	Mean used reads per cell	Cells with productive V-J spanning pair (%)	Reads mapped to any V(D)J gene (%)
MXMERZ002A_02	no	P01	Run 1	92.65	98.88	55.27	90.18	1414	31669	4145	5204	97.91	100	96.74	9.59	4970	477	326	103	71.37	18260	43.69	18.28	103	71.37	18260	43.69	18.28
MXMERZ002A_03	no	P07	Run 1	90.49	99.35	62.62	90.83	2158	44903	5173	6567	97.95	100	96.72	17.68	6686	1182	707	1110	86.1	22120	86.49	62.79	1110	86.1	22120	86.49	62.79
MXMERZ002A_05	no	P11	Run 1	88.28	99.47	60.17	95.17	1971	26755	5083	9528	97.95	100	96.54	46.62	2755	1284	953	429	71.58	29635	86.48	33.75	429	71.58	29635	86.48	33.75
MXMERZ002A_06	no	P12	Run 1	91.62	99.07	63.35	93.75	1643	36756	3679	8971	98.28	100	96.62	25.12	4459	1120	713	5750	94.48	7771	74.71	85.86	5750	94.48	7771	74.71	85.86
MXMERZ002A_07	no	P06	Run 1	89.59	99.56	57.89	55.63	1508	20678	3411	7586	98.22	100	96.67	21.65	4130	894	614	386	78.77	11704	58.81	14.88	386	78.77	11704	58.81	14.88
MXMERZ002A_09	no	P09	Run 1	90.49	99.7	65.49	90.46	2183	28178	5219	10320	98.14	100	96.55	39.32	3232	1271	737	3817	89.95	9118	91.56	74.3	3817	89.95	9118	91.56	74.3
MXMERZ002A_11	no	P11	Run 1	89.65	99.46	63.24	89.67	2152	26316	5487	9273	98.08	100	96.51	43.73	4476	1957	1445	1516	82.67	15629	85.88	61.33	1516	82.67	15629	85.88	61.33
MXMERZ002A_12	no	P14	Run 1	90.31	99.45	64.61	92.69	2248	33501	5954	8018	98.13	100	96.71	18.37	5797	1065	743	1518	88.15	17267	84.06	67.03	1518	88.15	17267	84.06	67.03
MXMERZ002A_13	no	P01	Run 1	87.61	99.6	57.99	87.25	2158	26020	5271	9618	98.24	100	96.61	45.91	3872	1778	1394	464	73.42	25794	84.91	30.44	464	73.42	25794	84.91	30.44
MXMERZ002A_14	no	P06	Run 1	89.91	99.53	65.47	88.44	2166	22837	5207	11085	98.17	100	96.62	37.3	3537	1319	1018	537	77.41	25216	85.29	35.16	537	77.41	25216	85.29	35.16
MXMERZ002A_15	no	P09	Run 1	92.44	96.95	71.54	92.33	1706	39939	3932	4796	98.07	100	96.66	17.18	10860	1866	1008	1891	91.41	16997	85.99	76.2	1891	91.41	16997	85.99	76.2
MXMERZ002A_17	no	P13	Run 1	90.03	98.79	65.09	92.23	1827	35776	4479	7503	98.13	100	96.63	28	4334	1214	837	1580	83.1	16311	84.37	60.34	1580	83.1	16311	84.37	60.34
MXMERZ002A_18	no	P14	Run 1	91.89	99.09	71.04	86.68	1867	20749	4874	8439	98.13	100	96.59	30.26	4890	1479	1109	1494	85.56	17456	85.61	63.26	1494	85.56	17456	85.61	63.26
MXMERZ002A_19	no	P08	Run 1	92.94	96.01	62.42	87.99	1416	18723	2999	2286	98.02	100	96.69	9.8	2915	286	169	712	88.28	8912	74.3	70.24	712	88.28	8912	74.3	70.24
MXMERZ002A_20	no	P08	Run 1	88.83	99.37	57.59	75.66	1591	16148	3038	10166	98.16	100	96.55	35.85	13744	4927	2153	1591	83.61	13076	82.59	45.77	1591	83.61	13076	82.59	45.77
MXMERZ002A_22	no	P10	Run 1	92.62	97.89	59.25	87.63	1677	27695	3878	2706	98.06	100	96.73	11.88	5832	693	416	289	75.77	22278	69.9	43.3	289	75.77	22278	69.9	43.3
MXMERZ002A_23	no	P10	Run 1	87.91	99.23	59.79	91.95	1881	21019	4607	8523	98.12	99.99	96.57	39.32	3220	1266	830	2027	83.14	9031	78.69	62.35	2027	83.14	9031	78.69	62.35
MXMERZ002A_24	no	P12	Run 1	86.03	99.59	56.55	90.13	2104	19225	4712	9695	98.02	99.99	96.54	36.14	3399	1229	720	1813	80.72	9039	87.37	53.67	1813	80.72	9039	87.37	53.67
MXMERZ002A_25	no	P13	Run 1	93.72	95.66	66.97	88.95	1653	20576	4118	1559	97.7	99.99	96.53	9.06	2365	214	127	100	80.62	19162	84	48.51	100	80.62	19162	84	48.51
T1_Lane_1	no	P30	Run 2	87.13	99.6	54.4	86.94	1745	37497	4356	3289	98.12	100	96.79	12.55	5580	700	377	1107	87.62	18592	37.58	73.64	1107	87.62	18592	37.58	73.64
T1_Lane_2	no	P20	Run 2	86.71	99.73	54.89	90.36	1846	29718	4647	3827	98.15	99.99	96.74	20.98	4531	951	473	461	77.85	26456	47.72	49.1	461	77.85	26456	47.72	49.1
T1_Lane_3	yes	P14,P15	Run 2	86.49	99.94	56.72	91.27	1934	31348	4550	8532	97.84	100	96.62	36.01	3878	1397	791	1141	83.41	23968	85.01	59.93	1141	83.41	23968	85.01	59.93
T1_Lane_4	yes	P25,P30	Run 2	87.27	99.9	57.31	93.51	1847	37160	4786	7363	97.83	100	96.77	24.62	4002	985	454	1813	87.47	19431	70.44	70.55	1813	87.47	19431	70.44	70.55
T1_Lane_5	yes	P33,P18	Run 2	88.13	99.86	59.16	94.65	1656	35352	4296	8037	97.84	100	96.58	36.09	4170	1505	701	2808	89.69	13621	73.9	77.25	2808	89.69	13621	73.9	77.25
T1_Lane_6	yes	P26,P24	Run 2	87.23	99.89	58.52	93.65	1803	35051	4344	8763	97.81	100	96.65	33.63	3963	1333	704	2542	88.24	14221	76.08	74.64	2542	88.24	14221	76.08	74.64
T2_Lane_1	no	P22	Run 2	87	99.88	57.11	91.86	1865	27190	4825	4762	97.79	99.99	96.65	22.86	3791	867	472	578	73.65	19580	48.96	39.59	578	73.65	19580	48.96	39.59
T2_Lane_2	no	P26	Run 2	87.71	99.88	61.24	93.22	2021	32717	5004	4552	97.76	100	96.42	30.36	4126	1253	542	2106	90.95	11483	76.4	81.54	2106	90.95	11483	76.4	81.54
T2_Lane_3	yes	P21,P33	Run 2	88.19	99.91	60.49	90.9	2048	23696	5125	10591	97.85	100	96.69	36.15	3769	1362	863	1459	82.44	22325	86.43	59.51	1459	82.44	22325	86.43	59.51
T2_Lane_4	yes	P16,P31	Run 2	88.01	99.9	60.56	89.87	2228	35297	5346	8954	97.85	100	96.67	26.43	6243	1650	948	820	78.79	26434	87.07	49.6	820	78.79	26434	87.07	49.6
T2_Lane_5	yes	P27,P21	Run 2	88.88	99.9	60.72	91.51	1796	31181	4275	9752	97.85	100	96.72	26.05	4909	1279	737	3610	89.39	13180	88.78	78.3	3610	89.39	13180	88.78	78.3
T2_Lane_6	yes	P15,P28	Run 2	90.47	99.92	70.68	96.66	1764	25678	4286	11484	97.87	100	96.64	40.89	4603	1882	936	6666	94.33	6994	91.82	85.15	6666	94.33	6994	91.82	85.15
T3_Lane_1	yes	P32,P23	Run 2	91.7	99.71	67.31	94.57	1733	43484	4142	7569	97.92	100	96.69	27.13	5652	1534	795	3506	93.35	13304	83.6	83.36	3506	93.35	13304	83.6	83.36
T3_Lane_2	yes	P17,P24	Run 2	86.14	99.85	57.71	93.91	1789	26429	4160	9961	97.89	100	96.78	36.03	3298	1188	816	1305	78.65	20634	86.59	56.58	1305	78.65	20634	86.59	56.58
T3_Lane_3	yes	P11,P32	Run 2	88.93	99.85	66.35	92.6	1812	36627	4379	8241	97.85	99.99	96.75	21.21	4507	956	594	2309	84.66	17577	81.72	69.58	2309	84.66	17577	81.72	69.58
T3_Lane_4	yes	P22,P12	Run 2	88.32	99.89	63.79	91.28	2125	23887	5101	5885	97.79	99.99	96.62	28.39	2338	664	507	340	75.56	27789	91.76	41.56	340	75.56	27789	91.76	41.56
T3_Lane_5	yes	P09,P31	Run 2	89.19	99.86	65.26	95.96	1735	39665	4223	10170	97.87	99.99	96.76	25.3	3430	868	483	3827	88.55	10472	73.22	75.21	3827	88.55	10472	73.22	75.21
T4_Lane_1	no	P17	Run 2	87.31	99.84	53.97	76.37	1744	27648	3763	3178	97.84	99.99	96.65	11.93	5583	666	398	374	75.64	30218	82.09	44.24	374	75.64	30218	82.09	44.24
T4_Lane_2	no	P19	Run 2	85.24	99.8	50.09	71.3	1507	44781	3061	1762	97.75	100	96.73	6.01	7442	448	210	378	84.99	33115	73.54	57.39	378	84.99	33115	73.54	57.39
T4_Lane_3	yes	P28,P22	Run 2	89.23	99.93	64.76	94.31	1415	25935	3025	7933	97.86	99.99	96.71	26.7	3379	902	480	1606	80.06	16530	68.18	57.3	1606	80.06	16530	68.18	57.3
T4_Lane_4	yes	P19,P25	Run 2	89.8	99.87	63.7	87.11	1340	33515	3098	6727	97.89	99.99	96.79	15.67	4117	645	404	491	73.04	19871	38.29	27.43	491	73.04	19871	38.29	27.43
T4_Lane_5	yes	P19,P25	Run 2	88.02	99.91	57.7	90.37	1567	34028	3504	8000	97.83	99.99	96.72	16.51	4492	742	424	1140	82.25	20744	80.53	51.17	1140	82.25	20744	80.53	51.17
T4_Lane_6	yes	P24,P26	Run 2	88.49	99.85	60.57	89.71	1510	40479	3289	6238	97.86	99.99	96.72	16.1	7594	1223	694	1675	85.45	19980	75.4	70.07	1675	85.45	19980	75.4	70.07
T5_Lane_1	yes	P15,P23	Run 2	86.86	99.73	53.49	87.71	1368	41385	2842	5329	97.89	99.99	96.77	10.03	7416	744	451	1180	82.1	23506	65.34	62.11	1180	82.1	23506	65.34	62.11
T5_Lane_2	no	P23	Run 2	87.09	99.65	51.29	89.47	1176	36154	2571	3543	97.78	99.99	96.66	8.29	4519	375	234	920	80.56	15012	57.5	45.76	920	80.56	15012	57.5	45.76
T5_Lane_3	yes	P33,P23	Run 2	85.69	99.88	58.56	93.6	1680	41870	3980	7454	97.86	99.99	96.63	25.26	4514	1140	583	3330	88.32	13441	80.72	74.69	3330	88.32	13441	80.72	74.69
T5_Lane_4	yes	P18,P27	Run 2	86.93	99.9	58.72	92.14	1580	30074	3625	9453	97.91	99.99	96.67	25.16	3251	818	474	3354	86.96	11842	77.4	74.51	3354	86.96	11842	77.4	74.51
T5_Lane_5	yes	P32,P20	Run 2	87.12	99.76	51.75	81.08	1435	34659	2711	5263	97.9	99.99	96.73	11.44	7480	856	508	762	73.48	26934	76.64	42.12	762	73.48	26934	76.64	42.12
T5_Lane_6	yes	P16,P17	Run 2	85.36	99.85	49.75	73.51	1439	36812	2724	4651	97.85	99.99	96.74	9.58	8486	813	506	573	70.96	24559	73.82	34.79	573	70.96	24559	73.82	34.79
T1-P1	yes	P34,P43_asct	Run 3	86.74	99.87	55.01	87.07	2111	28358	4950	7660	97.66	99.97	86.8	17.21	4376	753	466	760	70.08	10838	66.97	17.4	760	70.08	10838	66.97	17.4
T1-P2	yes	P08,P42	Run 3	87.85	99.88	61.71	89.94	1842	24081	4238	10009	97.7	99.97	81.13	26.14	2667	697	400	2446	77.49	10217	82.58	44.77	2446	77.49	10217	82.58	44.77
T1-P3	no	P48	Run 3	88.42	99.86	62.6	89.07	1526	12250	3126	5772	97.59	99.97	71.16	23.35	2512	587	307	2522	83.36	6216	86.2	59.08	2522	83.36	6216	86.2	59.08
T1-P4	yes	P41,P40	Run 3	86.16	99.93	54.53	88.88	554	6815	870	27933	97.72	99.97	83.44	34.77	1395	485	238	2962	78.97	3104	52.36	29.78	2962	78.97	3104	52.36	29.78
T1-P5	yes	P52,P36	Run 3	88.47	99.89	63.31	92.49	1819	27970	4126	10441	97.71	99.97	78.72	23.59	2716	641	350	2292	78.94	11611	85.69	45.9	2292	78.94	11611	85.69	45.9
T2-P1	yes	P32,P18_asct	Run 3	87.89	99.77	57.44	90.46	1688	22902	3590	10103	97.67	99.97	90.36	15.54	3658	568	376	3085	79.58	7283	81.2	31.15	3085	79.58	7283	81.2	31.15
T2-P2	yes	P43,P40	Run 3	87.92	99.83	60.54	86.06	1915	21872	4338	12444	97.62	99.97	78.04	32.95	3394	1118	634	2610	75.02	10731	81.3	39.32	2610	75.02	10731	81.3	39.32
T2-P3	yes	P37,P35	Run 3	89.22	99.78	63.73	90.75	1729	27939	3935	11560	97.68	99.97	83.93	22.87	1989	455	271	4753	83.7	6016	80.52	66.48	4753	83.7	6016	80.52	66.48
T2-P4	yes	P49,P09_asct	Run 3	86.41	99.64	50.1	83.73	1237	16567	2213	11777	97.61	99.87	92.24	13.87	2502	347	228	4744	83.15	4545	70.99	49.25	4744	83.15	4545	70.99	49.25
T2-P5	yes	P51,P30_asct	Run 3	87.31	99.78	48.39	72.77	1462	21395	2871	7161	97.65	99.86	89.7	11.19	2603	291	205	1008	76.81	11958	74.7	30.32	1008	76.81	11958	74.7	30.32
T2-S11	no	P41	Run 3	89.58	99.82	61.3	88.94	1596	15176	3631	7000	97.68	99.87	86.08	27.65	2557	707	397	2215	81.56	7125	86.46	61.72	2215	81.56	7125	86.46	61.72
T3-P1	no	P33	Run 3	88.03	99.84	63.37	92.47	1688	19888	4061	6462	97.66	99.97	86.79	35.48	2555	907	444	3357	82.37	5040	89.69	62.7	3357	82.37	5040	89.69	62.7
T3-P2	yes	P44,P34	Run 3	87.85	99.88	59.49	85.85	1115	10445	2075	15429	97.72	99.87	82.7	30.11	1684	507	264	2600	78.2	7729	70.15	35.57	2600	78.2	7729	70.15	35.57
T3-P3	yes	P49,P46	Run 3	91.97	99.93	53.22	96.44	189	11909	2657	26551	97.68	99.87	84.83	37.15	1135	422	199	4032	79.11	9872	61.38	54.92	4032	79.11	9872	61.38	54.92
T3-P4	yes	P51,P39	Run 3	87.78	99.82	63.23	91.69	1840	25842	4300	12295	97.67	99.87	81.58	31.82	2556	813	541	1414	74.78	20034	85.15	43.9	1414	74.78	20034	85.15	43.9
T4-P1	yes	P48,P37	Run 3	89.18	99.77	64.73	89.04	1518	32264	3219	8435	97.75	99.87	88.65	14.28	4173	596	365	1478	78.93	17428	81.8	55.94	1478	78.93	17428	81.8	55.94
T4-P2	yes	P30,P32_asct	Run 3	86.99	99.81	55.26	87.29	930	13436	1681	14724	97.72	99.87	91.51	17.03	2423	413	258	5762	82.99	4004	62.79	41.99	5762	82.99	4004	62.79	41.99
T4-P3	yes	P01,P25_asct	Run 3	86.43	99.81	44.66	79.72	1149	15070	2569	7591	97.74	99.97	91.81	12.9	4905	633	346	469	68.08	17208	85.93	26.23	469	68.08	17208	85.93	26.23
T4-P4	yes	P38,P36	Run 3	86.2	99.93	58.69	87.8	1520	19777	2959	10496	97.74	99.97	89.67	18.62	3809	709	439	1187	75.1	15820	75.99	44.75	1187	75.1	15820	75.99	44.75
T4-S9	no	P43	Run 3	87.03	99.9	56.71	82.56	1380	11943	2579	6553	97.7	99.86	87.62	15.94	2543	405	240	1210	78.28	11886	77.77	50.16	1210	78.28	11886	77.77	50.16
T5-P1	yes	P46,P38	Run 3	88.2	99.88	62.95	92.76	1640	17953	3840	14067	97.73	99.97	89.44	22.82	3604	823	501	6014	85.55	5351	81.48	68.53	6014	85.55	5351	81.48	68.53
T5-P2	yes	P36,P31	Run 3	88.66	99.88	52.37	92.42	1885	26825	4360	8511	97.77	99.97	90.22	13.71	4839	664	352	1842	77.02	14768	82.03	47.56	1842	77.02	14768	82.03	47.56
T5-P3	yes	P45,P35	Run 3	89.22	99.89	52.91	90.11	1528	19300	3799	12181	97.71	99.97	88.83	25.3	3414	864	529	3475	83.31	10074	65.53	64.8	3475	83.31	10074	65.53	64.8
T5-P4	yes	P34,P24_asct	Run 3	87.49	99.87	51.48	86.51	1856	24151	4165	8586	97.73	99.97	90.82	16.07	3676	591	386	1097	77.51	19873	87.24	45.97	1097	77.51	19873	87.24	45.97
T5-P5	yes	P06,P40_asct	Run 3	90.24	99.84	58.69	89.68	1596	19650	3636	10151	97.78	99.97	91.11	16.2	3661	593	411	468	68.05	22374	78.21	23.53	468	68.05	22374	78.21	23.53
T6-P1	yes	P52,P44	Run 3	87.88	99.9	63.59	90.42	1706	27888	3749	10379	97.8	99.86	89.76	18.66	2855	533	290	3868	84.18	9569	89.12	65.85	3868	84.18	9569	89.12	65.85
T6-P2	yes	P41,P45	Run 3	87.9	99.95	60.52	85.51	1513	13106	3055	14627	97.8	99.87	89.17	27.61	2240	618	385	4114	84.17	9401	89.18	65.46	4114	84.17	9401	89.18	65.46
T6-P3	yes	P39,P50	Run 3	88.01	99.91	58.44	78.29	883	10574	1498	16764	97.81	99.86	89.44	20.6	2287	471	268	2989	78.27	6672	62.5	28.25	2989	78.27	6672	62.5	28.25
T6-S9	no	P50	Run 3	87.85	99.52	54.89	63.57	1301	20083	2495	2370	97.74	99.86	88.31	3.86	5104	197	125	405	73.2	12680	73.09	28.97	405	73.2	12680	73.09	28.97
T1-A	yes	P42,P20	Run 4	84.82	99.7	59.8	93.73	1666	24796	3748	7350	97.52	99.83	78.26	22.67	6493	1472	803	2236	83.27	12827	82.02	67.74	2236	83.27	12827	82.02	67.74
T1-B	yes	P44,P58	Run 4	83.25	99.82	56.68	91.99	1739	25076	3976	8152	97.24	99.92	80.33	23.87	16573	3957	1902	3143	82.35	12361	84.28	67.17	3143	82.35	12361	84.28	67.17
T1-C	yes	P53,P63	Run 4	83.27	99.86	56.1	92.1	1660	22536	3804	9238	97.25	99.92	68.61	27.36	17124	4686	2388	1240	75.01	14083	61.69	49.07	1240	75.01	14083	61.69	49.07
T1-D	yes	P56,P55	Run 4	84.42	99.65	58.47	95.61	1666	21291	3732	10254	97.29	99.7	79.78	36.44	14749	5374	2350	1661	77.47	15837	73.27	54.73	1661	77.47	15837	73.27	54.73
T1-F	no	P62	Run 4	87.71	99.21	48.06	79.49	788	28762	1585	2238	97.33	99.7	77.51	6.12	13858	848	405	117	73.38	12836	64.1	12.88	117	73.38	12836	64.1	12.88
T2-A	yes	P57,P51	Run 4	89.04	99.43	59.54	92.52	1014	14449	1931	11966	97.4	99.7	78.83	23.89	4338	1036	615	2322	82.01	7137	62.14	37.59	2322	82.01	7137	62.14	37.59
T2-B	yes	P45,P56	Run 4	91.38	99.68	57.18	95.72	1183	15548	3608	10992	97.32	99.94	82.34	23	10357	2382	1394	3989	88.37	13609	84.63	78.89	3989	88.37	13609	84.63	78.89
T2-C	no	P63	Run 4	85.1	98.59	55.58	91.04	1452	68462	2974	3033	97.46	99.7	84	11.35	11804	1340	870	173	67.32	24904	75.14	33.67	173	67.32	24904	75.14	33.67
T2-D	yes	P55,P53	Run 4	86.97	99.74	59.94	92.61	1694	25063	3901	8989	97.32	99.94	79.44	24.28	14300	3472	2149	1516	82.09	14919	85.49	62.49	1516	82.09	14919	85.49	62.49
T2-E	yes	P60,P61	Run 4	86.94	99.57	62.06	94.21	1639	34898	3815	6842	97.32	99.94	82.79	19.67	16094	3166	1751	2504	84.68	12000	78.08	72.15	2504	84.68	12000	78.08	72.15
T3-A	yes	P62,P56	Run 4	87.62	99.68	55.98	88.2	1280	23962	2705	7119	97.72	100	81.25	17.39	5720	995	583	1247	75.68	15612	61.83	50.28	1247	75.68	15612	61.83	50.28
T3-B	yes	P61,P57	Run 4	86.1	99.6	50.86	86.56	1409	25722	2926	6036	97.7	100	80.52	13.28	6300	837	515	1132	74.41	13409	46.11	51.55	1132	74.41	13409	46.11	51.55
T3-C	yes	P65,P49	Run 4	88.19	99.85	60.64	92.86	1496	14828	3405	9743	97.33	100	80.78	22.73	7174	1631	973	3773	88.52	8057	84.36	75.22	3773	88.52	8057	84.36	75.22
T3-D	yes	P60,P53	Run 4	83.58	99.56	48.51	81.18	1573	18298	3154	3999	97.7	100	74.3	11.95	11517	1376	734	427	69.99	22034	69.79	35.84	427	69.99	22034	69.79	35.84
T3-E	yes	P59,P58	Run 4	85.59	99.59	59.67	94.61	1522	16513	3233	10826	97.36	99.74	81.28	27.92	6235	1741	1008	3407	86.16	7628	75.79	69.88	3407	86.16	7628	75.79	69.88

## Sheet: Suppl_Table_5
PATIENT_ID	DAY	CD4_CENTRAL_MEMORY_PERC	CD4_CENTRAL_MEMORY_ABS	CD4_EFF-MEMORY_PERC	CD4_EFF-MEMORY_ABS	CD4_EFFEKTORZELLEN_PERC	CD4_EFFEKTORZELLEN_ABS	CD8_CENTRAL_MEMORY_PERC	CD8_CENTRAL_MEMORY_ABS	CD8_EFF-MEMORY_PERC	CD8_EFF-MEMORY_ABS	CD8_EFFEKTORZELLEN_PERC	CD8_EFFEKTORZELLEN_ABS	MEMORY_TREGS_PERC	MEMORY_TREGS_ABS	NAIVE_CD4_PERC	NAIVE_CD4_ABS	NAIVE_CD8_PERC	NAIVE_CD8_ABS	NAIVE_TREGS_PERC	NAIVE_TREGS_ABS	TREGS_PERC	TREGS_ABS
P01	LP	0.640196	65.3	0.287255	29.3	0.0215686	2.2	0.219802	11.1	0.376238	19	0.283168	14.3	0.964539	13.6	0.027451	2.8	0.0475247	2.4	0.035461	0.5	0.086	14.3
P01	Day 30	0.602459	132.3	0.363843	79.9	0.0195811	4.3	0.057188	18.1	0.327962	103.8	0.538389	170.4	0.905085	26.7	0.00819672	1.8	0.0180095	5.7	0.0949153	2.8	0.047	30.6
P01	Day 100	0.534632	74.1	0.37013	51.3	0.0490621	6.8	0.4939	412.9	0.270335	226	0.160167	133.9	0.210046	4.6	0.0281385	3.9	0.012201	10.2	0.789954	17.3	0.019	22.2
P06	LP	0.621118	10	0.347826	5.6	0.0186335	0.3	0.0956938	4	0.882775	36.9	0.0167464	0.7	0.948718	3.7	0.00621118	0.1	0.00239234	0.1	0.0512821	0.2	0.065	4
P06	Day 30	0.629108	26.8	0.347418	14.8	0.0164319	0.7	0.288396	16.9	0.581911	34.1	0.0733788	4.3	0.962264	10.2	0.00234742	0.1	0.0409556	2.4	0.0377359	0.4	0.1	11.1
P06	Day 100	0.551963	23.9	0.443418	19.2	0.00230947	0.1	0.18209	30.5	0.792836	132.8	0.0197015	3.3	0.986755	14.9	0	0	0.0041791	0.7	0.013245	0.2	0.068	15.6
P09	LP	0.552558	59.4	0.426047	45.8	0.00744186	0.8	0.118068	46.2	0.523128	204.7	0.352671	138	0.994624	18.5	0.00837209	0.9	0.00127779	0.5	0.00537634	0.1	0.032	19
P09	Day 30	0.458179	61.9	0.532939	72	0.00444115	0.6	0.0867561	20.7	0.802598	191.5	0.0993294	23.7	0.994792	19.1	0.00222058	0.3	0.00125733	0.3	0.00520833	0.1	0.044	19.7
P09	Day 100	0.413284	78.4	0.562467	106.7	0.0168687	3.2	0.0687857	83.1	0.721463	871.6	0.207433	250.6	0.973684	33.3	0.00210859	0.4	0	0	0.0263158	0.9	0.022	35.8
P10	LP	0.699639	135.8	0.239567	46.5	0.00309119	0.6	0.19201	47.1	0.280065	68.7	0.211985	52	0.970684	29.8	0.0334879	6.5	0.145128	35.6	0.029316	0.9	0.069	31.8
P10	Day 30	0.636304	96.4	0.279208	42.3	0.0369637	5.6	0.145636	26.2	0.403002	72.5	0.20289	36.5	0.841772	26.6	0.0290429	4.4	0.0522512	9.4	0.158228	5	0.097	32.2
P10	Day 100	0.645485	96.5	0.190635	28.5	0.00802676	1.2	0.214073	43.2	0.292864	59.1	0.272052	54.9	0.835443	19.8	0.0916388	13.7	0.0525272	10.6	0.164557	3.9	0.067	24.1
P11	Day 30	0.713525	67	0.255591	24	0.0106496	1	0.151091	36.7	0.660354	160.4	0.124331	30.2	0.985	19.7	0.00745474	0.7	0.0308769	7.5	0.015	0.3	0.056	21.5
P11	Day 100	0.632166	39.7	0.342357	21.5	0.0127388	0.8	0.11996	11.9	0.669355	66.4	0.134073	13.3	0.985782	20.8	0.00955414	0.6	0.0342742	3.4	0.014218	0.3	0.068	21.4
P12	LP	0.560117	19.1	0.14956	5.1	0.0234604	0.8	0.136626	16.6	0.10535	12.8	0.330041	40.1	0.8	5.2	0.170088	5.8	0.145679	17.7	0.2	1.3	0.043	6.7
P12	Day 30	0.155279	5	0.835404	26.9	0.00310559	0.1	0.0122823	11	0.973537	871.9	0.0111657	10	0.875	3.5	0.00310559	0.1	0.00100491	0.9	0.125	0.5	0.004	4.4
P12	Day 100	0.274336	6.2	0.681416	15.4	0.0309734	0.7	0.0155462	3.7	0.905042	215.4	0.0785714	18.7	0.833333	3.5	0.00442478	0.1	0	0	0.166667	0.7	0.015	4.3
P13	LP	0.513329	82.8	0.411655	66.4	0.0192188	3.1	0.0698001	19.9	0.354262	101	0.374605	106.8	0.892761	33.3	0.0477371	7.7	0.0803227	22.9	0.107239	4	0.08	38.9
P13	Day 30	0.507485	33.9	0.375748	25.1	0.0538922	3.6	0.16895	7.4	0.289954	12.7	0.257991	11.3	0.869919	10.7	0.0508982	3.4	0.0981735	4.3	0.130081	1.6	0.107	12.9
P14	LP	0.409182	41	0.195609	19.6	0.0199601	2	0.166494	32.2	0.289555	56	0.139607	27	0.891892	13.2	0.205589	20.6	0.166494	32.2	0.108108	1.6	0.058	15.7
P14	Day 30	0.27381	13.8	0.69246	34.9	0.00992063	0.5	0.0787172	2.7	0.542274	18.6	0.198251	6.8	0.889401	19.3	0.00992063	0.5	0.0553936	1.9	0.110599	2.4	0.252	23.2
P14	Day 100	0.404594	22.9	0.526502	29.8	0.0212014	1.2	0.110793	15.5	0.664046	92.9	0.139385	19.5	0.860215	16	0.0265018	1.5	0.00643317	0.9	0.139785	2.6	0.088	18.7
P15	LP	0.681013	26.9	0.159494	6.3	0.0202532	0.8	0.177198	12.9	0.391484	28.5	0.336538	24.5	0.918367	4.5	0.078481	3.1	0.0467033	3.4	0.0816327	0.4	0.039	5.4
P15	Day 30	0.64297	40.7	0.339652	21.5	0.00631912	0.4	0.0653549	18.6	0.652143	185.6	0.278988	79.4	0.986395	14.5	0.00789889	0.5	0.00245959	0.7	0.0136054	0.2	0.034	15.6
P15	Day 100	0.587057	38.1	0.38829	25.2	0.0107858	0.7	0.114549	34.8	0.47235	143.5	0.344635	104.7	0.926316	8.8	0.00770416	0.5	0.0131666	4	0.0736842	0.7	0.022	10.4
P16	LP	0.530521	59.1	0.218133	24.3	0.0170557	1.9	0.154745	10.6	0.385401	26.4	0.164964	11.3	0.766187	21.3	0.144524	16.1	0.113869	7.8	0.233813	6.5	0.152	28.6
P16	Day 30	0.454861	13.1	0.496528	14.3	0.00694444	0.2	0.146214	5.6	0.456919	17.5	0.355091	13.6	0.926829	11.4	0.0208333	0.6	0.0182768	0.7	0.0731707	0.9	0.161	12.7
P17	LP	0.789894	59.4	0.200798	15.1	0.00531915	0.4	0.287731	26.5	0.674267	62.1	0.0314875	2.9	0.943662	13.4	0	0	0.00434311	0.4	0.056338	0.8	0.083	15
P17	Day 30	0.642066	17.4	0.346863	9.4	0.00369004	0.1	0.0659824	4.5	0.812317	55.4	0.109971	7.5	0.694656	9.1	0.00369004	0.1	0.00146628	0.1	0.305344	4	0.125	13.3
P17	Day 100	0.665198	15.1	0.30837	7	0.0220264	0.5	0.0734463	1.3	0.762712	13.5	0.152542	2.7	0.818182	8.1	0	0	0	0	0.181818	1.8	0.209	10.9
P18	LP	0.652886	690.1	0.258278	273	0.00927152	9.8	0.207892	394.1	0.49491	938.2	0.238434	452	0.961448	122.2	0.0578997	61.2	0.00453658	8.6	0.0385523	4.9	0.039	129.4
P18	Day 30	0.586957	116.1	0.375632	74.3	0.0242669	4.8	0.0242634	7	0.594801	171.6	0.375043	108.2	0.904645	37	0.00758342	1.5	0	0	0.0953545	3.9	0.076	43.3
P18	Day 100	0.534819	134.4	0.449662	113	0.0103462	2.6	0.0847921	31	0.454595	166.2	0.433807	158.6	0.865625	55.4	0.00198965	0.5	0.0035558	1.3	0.134375	8.6	0.078	54.3
P19	LP	0.380328	34.8	0.156284	14.3	0.031694	2.9	0.0238095	1.8	0.141534	10.7	0.425926	32.2	0.662162	4.9	0.360656	33	0.277778	21	0.337838	2.5	0.045	8
P19	Day 30	0.545063	126.4	0.312635	72.5	0.00689953	1.6	0.0376374	33.9	0.575774	518.6	0.361497	325.6	0.905303	23.9	0.0918499	21.3	0.00344177	3.1	0.094697	2.5	0.021	26.8
P19	Day 100	0.576145	54.1	0.255591	24	0.0149095	1.4	0.010263	3.2	0.332264	103.6	0.528223	164.7	0.47561	3.9	0.110756	10.4	0.00609365	1.9	0.52439	4.3	0.024	10.1
P20	LP	0.641825	84.4	0.0661597	8.7	0.00760456	1	0.282567	29.5	0.319923	33.4	0.12069	12.6	0.786885	9.6	0.194677	25.6	0.114943	12	0.213115	2.6	0.045	12.6
P20	Day 30	0.619592	75.9	0.269388	33	0.00408163	0.5	0.13864	26.3	0.618872	117.4	0.173959	33	0.873832	18.7	0.077551	9.5	0.0210859	4	0.126168	2.7	0.063	22.1
P20	Day 100	0.5747	52.7	0.251908	23.1	0.00545256	0.5	0.0954373	25.1	0.807985	212.5	0.0764259	20.1	0.818182	8.1	0.0992366	9.1	0.0136882	3.6	0.181818	1.8	0.027	10.4
P21	LP	0.570437	82.2	0.244969	35.3	0.0208189	3	0.231115	25.7	0.392986	43.7	0.271583	30.2	0.796296	8.6	0.141568	20.4	0.0413669	4.6	0.203704	2.2	0.04	11.2
P21	Day 30	0.424242	44.8	0.52178	55.1	0.0236742	2.5	0.0687785	24.1	0.731164	256.2	0.131564	46.1	0.91358	14.8	0.0179924	1.9	0.00456621	1.6	0.0864198	1.4	0.031	16.4
P21	Day 100	0.455521	59.4	0.498466	65	0.0222393	2.9	0.0187926	8	0.894762	380.9	0.0765798	32.6	0.92437	11	0.0207055	2.7	0.0065774	2.8	0.0756302	0.9	0.02	12.2
P22	LP	0.248242	45.9	0.238507	44.1	0.0232558	4.3	0.164843	24.1	0.606019	88.6	0.179207	26.2	0.898396	16.8	0.307193	56.8	0.0307798	4.5	0.101604	1.9	0.049	18.9
P22	Day 30	0.583174	30.5	0.367113	19.2	0.0210325	1.1	0.0309485	7.7	0.297026	73.9	0.504421	125.5	0.82	8.2	0.0172084	0.9	0.0221061	5.5	0.18	1.8	0.034	10.4
P22	Day 100	0.269821	21.1	0.673913	52.7	0.0511509	4	0.114526	318.6	0.855782	2380.7	0.0296919	82.6	0.803922	4.1	0.00127877	0.1	0	0	0.196078	1	0.002	6.2
P23	LP	0.41791	47.6	0.553117	63	0.0210711	2.4	0.0469167	29.9	0.44108	281.1	0.495999	316.1	0.949495	9.4	0.00614574	0.7	0.00109838	0.7	0.0505051	0.5	0.013	11.3
P23	Day 30	0.23116	27.3	0.705334	83.3	0.0592718	7	0.00930785	9.4	0.381028	384.8	0.461333	465.9	0.946429	5.3	0.00084674	0.1	0	0	0.0535714	0.3	0.005	5.9
P23	Day 100	0.125855	9.2	0.863201	63.1	0.00820793	0.6	0.00105005	0.9	0.898145	769.8	0.0810874	69.5	0.947917	9.1	0.00136799	0.1	0	0	0.0520833	0.5	0.01	10
P24	LP	0.679803	82.8	0.154351	18.8	0.00328407	0.4	0.145112	23.9	0.378264	62.3	0.377049	62.1	0.916667	9.9	0.102627	12.5	0.0868245	14.3	0.0833333	0.9	0.027	11.7
P24	Day 30	0.479436	159.7	0.512459	170.7	0.00510357	1.7	0.046822	20.7	0.624746	276.2	0.301063	133.1	0.869942	30.1	0.00090063	0.3	0	0	0.130058	4.5	0.041	36.2
P24	Day 100	0.487245	38.2	0.502551	39.4	0.00637755	0.5	0.0354365	4.1	0.634399	73.4	0.31115	36	0.964286	13.5	0.00255102	0.2	0	0	0.0357143	0.5	0.065	14.4
P25	LP	0.663604	166.1	0.0603276	15.1	0.0103875	2.6	0.365196	104.3	0.183824	52.5	0.206232	58.9	0.595331	15.3	0.172593	43.2	0.0630252	18	0.404669	10.4	0.048	26.2
P25	Day 30	0.678082	19.8	0.208904	6.1	0.0753425	2.2	0.122034	7.2	0.554237	32.7	0.3	17.7	0.54717	5.8	0.0376712	1.1	0.0101695	0.6	0.45283	4.8	0.106	11.2
P25	Day 100	0.756818	33.3	0.154545	6.8	0.0613636	2.7	0.233996	10.6	0.456954	20.7	0.298013	13.5	0.771084	6.4	0.0227273	1	0.00662252	0.3	0.228916	1.9	0.088	8.8
P26	LP	0.354751	51.9	0.565277	82.7	0.0382775	5.6	0.0609017	36.2	0.22712	135	0.703735	418.3	0.94382	8.4	0.0321258	4.7	0.00471063	2.8	0.0561798	0.5	0.008	9
P26	Day 30	0.147918	47.6	0.751398	241.8	0.0910503	29.3	0.0135515	11.1	0.452692	370.8	0.530094	434.2	0.923077	28.8	0.00435053	1.4	0	0	0.0769231	2.4	0.022	32
P26	Day 100	0.286413	52.7	0.608152	111.9	0.0945652	17.4	0.0170137	19.2	0.291006	328.4	0.689677	778.3	0.817391	9.4	0.00978261	1.8	0	0	0.182609	2.1	0.007	12
P27	LP	0.463623	124.9	0.210839	56.8	0.0107647	2.9	0.127428	55.1	0.267345	115.6	0.442414	191.3	0.666667	13.8	0.218634	58.9	0.0684551	29.6	0.333333	6.9	0.029	21.3
P27	Day 30	0.315818	57.7	0.580733	106.1	0.00875753	1.6	0.0196881	7.7	0.393506	153.9	0.551266	215.6	0.769547	18.7	0.0596607	10.9	0.0094605	3.7	0.230453	5.6	0.043	25.9
P27	Day 100	0.433181	114.1	0.46735	123.1	0.0144267	3.8	0.0348743	25.8	0.434171	321.2	0.48824	361.2	0.907258	22.5	0.0539104	14.2	0.00783996	5.8	0.0927419	2.3	0.023	26
P28	LP	0.294682	67.6	0.666957	153	0.00915432	2.1	0.0406041	57	0.675096	947.7	0.274469	385.3	0.941176	8	0.0152572	3.5	0.00327682	4.6	0.0588235	0.5	0.005	9
P28	Day 30	0.095941	2.6	0.660517	17.9	0.232472	6.3	0.00995025	0.8	0.681592	54.8	0.278607	22.4	0.666667	0.2	0.00369004	0.1	0.00248756	0.2	0.333333	0.1	0.005	0.6
P28	Day 100	0.231939	24.4	0.526616	55.4	0.236692	24.9	0.0311486	9.6	0.73037	225.1	0.220311	67.9	0.955056	8.5	0.00095057	0.1	0.00389358	1.2	0.0449438	0.4	0.017	9.1
P29	LP	0.467844	74.2	0.456494	72.4	0.0397226	6.3	0.0530828	61.3	0.732421	845.8	0.205317	237.1	0.70339	8.3	0.0245902	3.9	0.00112574	1.3	0.29661	3.5	0.008	12.8
P29	Day 30	0.511059	43.9	0.447031	38.4	0.0360885	3.1	0.0221009	8.5	0.889236	342	0.0876235	33.7	0.917647	7.8	0.00349243	0.3	0	0	0.0823529	0.7	0.016	8.8
P30	LP	0.470432	141.6	0.42093	126.7	0.0528239	15.9	0.1255	81.6	0.260689	169.5	0.527376	342.9	0.957143	20.1	0.0362126	10.9	0.00845894	5.5	0.0428571	0.9	0.019	21.4
P30	Day 30	0.251089	17.3	0.683599	47.1	0.0493469	3.4	0.0140118	1.9	0.673304	91.3	0.303835	41.2	0.943231	21.6	0.00870827	0.6	0.00221239	0.3	0.0567686	1.3	0.096	23.3
P30	Day 100	0.141717	28.4	0.82984	166.3	0.0184631	3.7	0.0173136	12.4	0.63823	457.1	0.34334	245.9	0.903226	14	0.00499002	1	0	0	0.0967742	1.5	0.015	16
P31	LP	0.55137	16.1	0.308219	9	0.0273973	0.8	0.0319465	4.3	0.758544	102.1	0.15899	21.4	0.837838	6.2	0.0821918	2.4	0.0215453	2.9	0.162162	1.2	0.044	8.4
P31	Day 30	0.276923	1.8	0.6	3.9	0.0769231	0.5	0.00440529	0.1	0.797357	18.1	0.193833	4.4	0.960784	4.9	0	0	0	0	0.0392157	0.2	0.142	5.5
P31	Day 100	0.285714	0.2	0.428571	0.3	0.285714	0.2	0	0	0.901961	4.6	0.0784314	0.4		0	0	0	0	0		0	0	0
P32	LP	0.258778	19.9	0.70091	53.9	0.0325097	2.5	0.00759607	5.1	0.365952	245.7	0.612452	411.2	0.939394	6.2	0.00390117	0.3	0.0010426	0.7	0.0606061	0.4	0.008	6.7
P32	Day 30	0.239193	41.5	0.721614	125.2	0.0368876	6.4	0.031579	29.1	0.680304	626.9	0.286923	264.4	0.967213	11.8	0.00115274	0.2	0	0	0.0327869	0.4	0.01	12.7
P32	Day 100	0.375802	41	0.499542	54.5	0.116407	12.7	0.0124104	7.1	0.243489	139.3	0.738507	422.5	0.963855	8	0.00366636	0.4	0	0	0.0361446	0.3	0.011	8.5
P33	LP	0.345367	28.7	0.640193	53.2	0.00481348	0.4	0.0124829	20.1	0.498447	802.6	0.386287	622	0.960854	27	0.00481348	0.4	0	0	0.0391459	1.1	0.014	28.3
P33	Day 30	0.346373	48.7	0.630868	88.7	0.0177809	2.5	0.0207354	7.5	0.615427	222.6	0.311584	112.7	0.962766	18.1	0.00142248	0.2	0	0	0.037234	0.7	0.027	19
P33	Day 100	0.248845	70	0.738713	207.8	0.0103093	2.9	0	0	0.473565	1467.2	0.523046	1620.5	0.917031	21	0.00106648	0.3	0	0	0.0829694	1.9	0.006	22.9
P34	LP	0.383966	9.1	0.35865	8.5	0.253165	6	0.0537634	9	0.16129	27	0.659498	110.4	0.962963	5.2	0.00421941	0.1	0.00119474	0.2	0.037037	0.2	0.027	5.7
P34	Day 30	0.366089	19	0.589595	30.6	0.0385356	2	0.00766284	4	0.412452	215.3	0.579885	302.7	0.913793	10.6	0.00192678	0.1	0	0	0.0862069	1	0.02	12.8
P34	Day 100	0.436893	22.5	0.539806	27.8	0.023301	1.2	0.0448359	5.6	0.303443	37.9	0.646117	80.7	0.898204	15	0	0	0	0	0.101796	1.7	0.085	17
P35	LP	0.35129	107.6	0.548482	168	0.0894548	27.4	0.120082	47	0.675013	264.2	0.178079	69.7	0.974603	30.7	0.00652955	2	0.0117527	4.6	0.0253968	0.8	0.036	33.8
P35	Day 30	0.296429	8.3	0.517857	14.5	0.175	4.9	0.062069	1.8	0.472414	13.7	0.444828	12.9	0.94	4.7	0.00357143	0.1	0.00689655	0.2	0.06	0.3	0.071	5.5
P35	Day 100	0.267311	33.2	0.603865	75	0.119163	14.8	0.0242802	15.6	0.813852	522.9	0.156576	100.6	0.939655	10.9	0.00402576	0.5	0.00217899	1.4	0.0603448	0.7	0.014	12.3
P36	LP	0.451181	259.7	0.0559416	32.2	0.458304	263.8	0.357403	156.9	0.278588	122.3	0.350569	153.9	0.944915	22.3	0.00920778	5.3	0	0	0.0550848	1.3	0.023	26.9
P36	Day 30	0.570175	58.5	0.134503	13.8	0.282651	29	0.110494	21.9	0.351665	69.7	0.529768	105	0.935185	10.1	0.00389864	0.4	0.00100908	0.2	0.0648148	0.7	0.031	11.5
P36	Day 100	0.412418	118.9	0.0665973	19.2	0.517863	149.3	0.182641	58.5	0.341555	109.4	0.474555	152	0.93361	22.5	0.00104058	0.3	0	0	0.06639	1.6	0.034	25.2
P37	LP	0.545374	61.9	0.413216	46.9	0.0246696	2.8	0.102954	24.4	0.720253	170.7	0.173418	41.1	0.956522	13.2	0.0114537	1.3	0.00126582	0.3	0.0434783	0.6	0.035	14.2
P37	Day 30	0.442478	5	0.530973	6	0.0265487	0.3	0.0938865	4.3	0.871179	39.9	0.0349345	1.6	1	2.6	0	0	0	0	0	0	0.043	2.7
P37	Day 100	0.175743	7.1	0.784653	31.7	0.039604	1.6	0.00641319	2.8	0.914109	399.1	0.0774164	33.8	0.984127	6.2	0	0	0	0	0.015873	0.1	0.013	6.6
P38	LP	0.505811	91.4	0.423907	76.6	0.0149419	2.7	0.0988285	32.9	0.443076	147.5	0.242115	80.6	0.868327	24.4	0.0486995	8.8	0.0970261	32.3	0.131673	3.7	0.055	29
P38	Day 30	0.449958	106.1	0.506361	119.4	0.0233249	5.5	0.0426357	17.6	0.598353	247	0.323643	133.6	0.933709	66.2	0.0139949	3.3	0.0196221	8.1	0.0662906	4.7	0.092	72
P38	Day 100	0.515199	98.3	0.401992	76.7	0.0707547	13.5	0.0638117	22.5	0.315939	111.4	0.554169	195.4	0.851003	29.7	0.00838574	1.6	0.00850822	3	0.148997	5.2	0.06	36
P39	LP	0.551301	112.3	0.20324	41.4	0.00687285	1.4	0.0939716	5.3	0.546099	30.8	0.225177	12.7	0.886598	25.8	0.228768	46.6	0.072695	4.1	0.113402	3.3	0.086	29.7
P39	Day 30	0.615385	96	0.175	27.3	0.0307692	4.8	0.0358566	0.9	0.545817	13.7	0.334661	8.4	0.686084	21.2	0.176282	27.5	0.059761	1.5	0.313916	9.7	0.12	31.7
P39	Day 100	0.668209	202.2	0.103767	31.4	0.00958361	2.9	0.140167	6.7	0.462343	22.1	0.125523	6	0.817102	34.4	0.151024	45.7	0.108787	5.2	0.182898	7.7	0.098	42.3
P40	LP	0.396982	60.5	0.595144	90.7	0.00393701	0.6	0.074203	53.3	0.908534	652.6	0.017263	12.4	0.993377	45	0	0	0	0	0.00662252	0.3	0.05	47.5
P40	Day 30	0.168814	26.2	0.815077	126.5	0.0135309	2.1	0.0586658	17.5	0.894402	266.8	0.0469326	14	0.91453	10.7	0.00128866	0.2	0	0	0.0854701	1	0.025	12.3
P40	Day 100	0.177778	26.4	0.769024	114.2	0.0511785	7.6	0.0925539	26.6	0.803758	231	0.103688	29.8	0.976	12.2	0	0	0	0	0.024	0.3	0.024	12.7
P41	LP	0.247686	123.1	0.07666	38.1	0.00442656	2.2	0.0334507	17.1	0.214984	109.9	0.384585	196.6	0.818182	20.7	0.37827	188	0.0907668	46.4	0.181818	4.6	0.028	26.5
P41	Day 30	0.424451	67.7	0.340439	54.3	0.0746081	11.9	0.0620525	20.8	0.375298	125.8	0.533413	178.8	0.853659	10.5	0.077116	12.3	0.0211814	7.1	0.146341	1.8	0.02	12.5
P41	Day 100	0.29439	50.9	0.440717	76.2	0.112204	19.4	0.0368468	16.5	0.302144	135.3	0.579723	259.6	0.820225	7.3	0.0803933	13.9	0.0209915	9.4	0.179775	1.6	0.012	9.4
P42	LP	0.450795	295	0.211797	138.6	0.0136002	8.9	0.157014	99.5	0.146757	93	0.222187	140.8	0.929155	34.1	0.170996	111.9	0.227395	144.1	0.0708447	2.6	0.027	37.2
P42	Day 30	0.527008	76.1	0.394737	57	0.0138504	2	0.057736	17.8	0.66072	203.7	0.133636	41.2	1	14.7	0.0193906	2.8	0.0107039	3.3	0	0	0.549	349.7
P42	Day 100	0.473885	74.4	0.417197	65.5	0.0171974	2.7	0.0285278	16.8	0.404313	238.1	0.531499	313	0.91	27.3	0.0433121	6.8	0.0220751	13	0.09	2.7	0.047	30.6
P43	Day 30	0.136429	19.1	0.84	117.6	0.00642857	0.9	0.0200195	4.1	0.538086	110.2	0.43457	89	1	5	0.015	2.1	0.00097656	0.2	0	0	0.01	5.2
P44	LP	0.649177	63.1	0.295267	28.7	0.0113169	1.1	0.134627	22.2	0.521528	86	0.265616	43.8	0.92973	17.2	0.0216049	2.1	0.0357793	5.9	0.0702703	1.3	0.068	20.1
P44	Day 30	0.0545145	16	0.0998296	29.3	0.00715503	2.1	0.0131951	5.6	0.0369934	15.7	0.211357	89.7	0.459091	10.1	0.00034072	0.1	0.00094251	0.4	0.0954545	2.1	0.063	12.7
P44	Day 30	0.0333901	9.8	0.73322	215.2	0.0528109	15.5	0.00235627	1	0.0169651	7.2	0.581291	246.7	0.404545	8.9	0.0149915	4.4	0.0282752	12	0.0409091	0.9	0.013	10
P44	Day 100	0.545794	29.2	0.379439	20.3	0.0598131	3.2	0.0711701	11.8	0.241858	40.1	0.677322	112.3	0.981132	10.4	0.00747664	0.4	0.00361882	0.6	0.0188679	0.2	0.04	10.8
P45	LP	0.30303	13	0.596737	25.6	0.0652681	2.8	0.00892857	0.8	0.162946	14.6	0.671875	60.2	0.9	1.8	0.018648	0.8	0.0078125	0.7	0.1	0.2	0.016	2.8
P45	Day 100	0.292899	9.9	0.189349	6.4	0.251479	8.5	0.00312337	1.2	0.0163977	6.3	0.860489	330.6	0.956044	8.7	0.168639	5.7	0.0270692	10.4	0.043956	0.4	0.012	9.5
P46	LP	0.14656	89.9	0.740626	454.3	0.0122269	7.5	0.0383179	19.5	0.514836	262	0.352525	179.4	0.789474	9	0.0609716	37.4	0.046571	23.7	0.210526	2.4	0.008	11.6
P46	Day 30	0.280239	32.9	0.68569	80.5	0.011925	1.4	0.0412169	4.2	0.571148	58.2	0.37684	38.4	0.801587	10.1	0.0187393	2.2	0.00294406	0.3	0.198413	2.5	0.046	12.8
P47	LP	0.516129	83.2	0.344913	55.6	0.0700993	11.3	0.0648454	21.6	0.138997	46.3	0.648754	216.1	0.892308	11.6	0.0440447	7.1	0.0165116	5.5	0.107692	1.4	0.025	13.5
P47	Day 30	0.340249	41	0.575104	69.3	0.0829875	10	0.0238753	12.1	0.158248	80.2	0.815706	413.4	0.575	9.2	0.00082988	0.1	0	0	0.425	6.8	0.025	18.2
P48	LP	0.257895	4.9	0.457895	8.7	0.068421	1.3	0.00883838	0.7	0.619949	49.1	0.344697	27.3	0.9375	3	0.0894737	1.7	0.00883838	0.7	0.0625	0.2	0.023	3.3
P48	Day 30	0.257066	38.2	0.699865	104	0.0282638	4.2	0.0183013	3.9	0.833412	177.6	0.14031	29.9	0.912281	5.2	0.00942127	1.4	0.00563116	1.2	0.0877193	0.5	0.013	5.7
P48	Day 100	0.341525	54.2	0.616887	97.9	0.0195337	3.1	0.0456326	19.8	0.698087	302.9	0.251901	109.3	0.945205	6.9	0.0138626	2.2	0.00299608	1.3	0.0547945	0.4	0.009	7.5
P49	LP	0.366834	65.7	0.480737	86.1	0.0156337	2.8	0.0669314	23.6	0.331821	117	0.415485	146.5	0.69697	6.9	0.080402	14.4	0.0700511	24.7	0.30303	3	0.013	10
P49	Day 30	0.215633	16	0.747978	55.5	0.0296496	2.2	0.00405828	10.5	0.984733	2547.8	0.0112086	29	0.571429	12.4	0.00404313	0.3	0	0	0.428571	9.3	0.008	22.2
P49	Day 100	0.326733	13.2	0.641089	25.9	0.0173267	0.7	0.0243882	29.4	0.877063	1057.3	0.0919121	110.8	0.931937	17.8	0.00990099	0.4	0.00663625	8	0.0680628	1.3	0.013	19.3
P50	LP	0.527938	27.4	0.304432	15.8	0.0404624	2.1	0.102132	9.1	0.433221	38.6	0.390572	34.8	0.936508	5.9	0.0732177	3.8	0.0291807	2.6	0.0634921	0.4	0.04	6.6
P50	Day 30	0.281649	28.7	0.566241	57.7	0.14524	14.8	0.00687088	2.4	0.485829	169.7	0.506155	176.8	0.865854	7.1	0.00686948	0.7	0	0	0.134146	1.1	0.016	9
P51	LP	0.477273	65.1	0.443548	60.5	0.0205279	2.8	0.00307338	0.8	0.86093	224.1	0.116404	30.3	0.837104	18.5	0.0249267	3.4	0.013446	3.5	0.162896	3.6	0.053	23
P51	Day 30	0.418095	43.9	0.482857	50.7	0.0419048	4.4	0.114522	19.4	0.441558	74.8	0.346517	58.7	0.924399	26.9	0.0428571	4.5	0.083235	14.1	0.0756014	2.2	0.086	30.1
P51	Day 100	0.332748	37.9	0.598771	68.2	0.0254609	2.9	0.0459624	18.1	0.472575	186.1	0.356018	140.2	0.829268	13.6	0.0263389	3	0.0459624	18.1	0.170732	2.8	0.03	17.4
P52	LP	0.468683	65.1	0.224622	31.2	0.0223182	3.1	0.122195	39.2	0.263092	84.4	0.583853	187.3	0.911565	26.8	0.203744	28.3	0.00997506	3.2	0.0884354	2.6	0.053	30.8
P52	Day 30	0.390916	52.5	0.43038	57.8	0.0893522	12	0.0913636	20.1	0.347727	76.5	0.555	122.1	0.923611	26.6	0.0871184	11.7	0.00227273	0.5	0.0763889	2.2	0.067	29.5
P52	Day 100	0.543303	107.9	0.302618	60.1	0.0281974	5.6	0.0882037	57.5	0.235312	153.4	0.622335	405.7	0.863071	20.8	0.125881	25	0.0541494	35.3	0.136929	3.3	0.022	24.6
P53	LP	0.555324	26.6	0.217119	10.4	0.00626305	0.3	0.158576	9.8	0.527508	32.6	0.066343	4.1	0.882353	3	0.127349	6.1	0.124595	7.7	0.117647	0.4	0.032	3.6
P53	Day 30	0.181818	8.4	0.774892	35.8	0.0108225	0.5	0.0214286	2.4	0.7	78.4	0.0616071	6.9	0.888889	4.8	0.0194805	0.9	0.104464	11.7	0.111111	0.6	0.036	5.8
P53	Day 100	0.350211	16.6	0.542194	25.7	0.0253165	1.2	0.0269483	3.7	0.461034	63.3	0.0968682	13.3	0.922078	7.1	0.0738397	3.5	0.184996	25.4	0.0779221	0.6	0.043	8
P54	LP	0.412045	587.7	0.0291664	41.6	0.00680081	9.7	0.268884	143.1	0.152762	81.3	0.235062	125.1	0.6882	79.9	0.375096	535	0.168734	89.8	0.3118	36.2	0.059	122
P54	Day 30	0.667998	351.1	0.238584	125.4	0.0163622	8.6	0.350466	116.6	0.571386	190.1	0.0628194	20.9	0.944767	65	0.0759132	39.9	0.00661256	2.2	0.0552326	3.8	0.074	71
P54	Day 100	0.765505	349.3	0.0734166	33.5	0.00438308	2	0.303111	148.1	0.337495	164.9	0.288375	140.9	0.792651	60.4	0.155599	71	0.0675399	33	0.207349	15.8	0.072	80.5
P55	LP	0.443182	7.8	0.392045	6.9	0.0738636	1.3	0.375	3.6	0.21875	2.1	0.375	3.6	0.880435	8.1	0.0795455	1.4	0.0104167	0.1	0.119565	1.1	0.179	9.5
P55	Day 30	0.522388	59.5	0.194908	22.2	0.0298507	3.4	0.0880649	7.6	0.186559	16.1	0.212051	18.3	0.836653	21	0.172081	19.6	0.249131	21.5	0.163347	4.1	0.129	25.8
P55	Day 100	0.519406	91	0.194064	34	0.0119863	2.1	0.0756364	10.4	0.248	34.1	0.156364	21.5	0.771784	18.6	0.259132	45.4	0.494545	68	0.228216	5.5	0.067	24.5
P56	LP	0.381337	103.8	0.544085	148.1	0.0337987	9.2	0.0691466	47.4	0.395624	271.2	0.505908	346.8	0.834951	25.8	0.0198384	5.4	0.0119621	8.2	0.165049	5.1	0.026	31.1
P56	Day 30	0.385946	35.7	0.562162	52	0.0508108	4.7	0.0604862	10.7	0.457321	80.9	0.473149	83.7	0.851852	13.8	0.00108108	0.1	0	0	0.148148	2.4	0.051	16.6
P56	Day 100	0.236617	44.2	0.724839	135.4	0.0310493	5.8	0.0587953	24.5	0.50228	209.3	0.433165	180.5	0.844086	15.7	0.00642398	1.2	0.0011999	0.5	0.155914	2.9	0.027	19
P57	LP	0.649007	49	0.112583	8.5	0.015894	1.2	0.129794	4.4	0.174041	5.9	0.20354	6.9	0.883495	9.1	0.160265	12.1	0.188791	6.4	0.116505	1.2	0.096	10.4
P57	Day 30	0.577009	103.4	0.268973	48.2	0.015625	2.8	0.0061237	2	0.756277	247	0.0431721	14.1	0.986239	21.5	0.137277	24.6	0.184017	60.1	0.0137615	0.3	0.038	21.8
P58	Day 30	0.0692708	190.1	0.930729	2554.2	0	0	0.0391186	49	0.928948	1163.6	0.0308957	38.7	1	12.8	0	0	0	0	0	0	0.003	12.8
P58	Day 100	0.0605211	58.3	0.932316	898.1	0.00716288	6.9	0.032538	25.5	0.937859	735	0.020416	16	0.972603	7.1	0	0	0.00918719	7.2	0.0273973	0.2	0.004	7.3
P59	LP	0.632882	247.9	0.251213	98.4	0.025785	10.1	0.296579	97.1	0.270312	88.5	0.38485	126	0.831858	28.2	0.0589737	23.1	0.0161881	5.3	0.168142	5.7	0.042	34.7
P59	Day 30	0.434161	69.9	0.542857	87.4	0.010559	1.7	0.0321556	8.1	0.889242	224	0.0730449	18.4	0.969136	15.7	0.00310559	0.5	0.00119095	0.3	0.0308642	0.5	0.035	16.7
P60	LP	0.405755	28.2	0.326619	22.7	0.066187	4.6	0.0185341	2.2	0.073294	8.7	0.756529	89.8		4.5	0.116547	8.1	0.0395956	4.7			0.028
P60	Day 30	0.396178	31.1	0.464968	36.5	0.117197	9.2	0.0791016	8.1	0.158203	16.2	0.746094	76.4	0.962963	5.2	0.0191083	1.5	0.00585938	0.6	0.037037	0.2	0.024	5.4
P61	LP	0.47117	223.9	0.0805976	38.3	0.0183081	8.7	0.377088	63.2	0.198687	33.3	0.2858	47.9	0.757432	63.7	0.265783	126.3	0.0704057	11.8	0.242568	20.4	0.132	85.9
P61	Day 100	0.446602	64.4	0.446602	64.4	0.00693481	1	0.050705	18.7	0.530098	195.5	0.412419	152.1	0.923469	18.1	0.0596394	8.6	0.00569414	2.1	0.0765306	1.5	0.035	20
P62	LP	0.491387	54.2	0.485947	53.6	0.0135993	1.5	0.12848	36	0.64561	180.9	0.224839	63	0.996	24.9	0.00181324	0.2	0	0	0.004	0.1	0.055	27.1
P63	LP	0.73727	244.7	0.207894	69	0.0108466	3.6	0.169835	40.2	0.420786	99.6	0.396282	93.8	0.952632	90.5	0.0394697	13.1	0.00253485	0.6	0.0473684	4.5	0.145	97.3
P63	Day 30	0.456538	62.5	0.449233	61.5	0.0482104	6.6	0.0900946	18.1	0.632155	127	0.240916	48.4	0.907489	20.6	0.0438276	6	0.0288701	5.8	0.092511	2.1	0.064	24.1
P64	LP	0.461203	52.9	0.508282	58.3	0.0165649	1.9		10.7		79.2		37.7	0.981013	15.5	0.00697472	0.8		12.9	0.0189873	0.3	0.054	16.5
P64	Day 30	0.345157	25.3	0.641201	47	0.010914	0.8	0.0634328	5.1	0.645522	51.9	0.287313	23.1	0.972477	10.6	0	0	0	0	0.0275229	0.3	0.063	11.2
P64	Day 100	0.252421	39.1	0.672692	104.2	0.074887	11.6	0.0981952	32.1	0.538697	176.1	0.360661	117.9	0.965116	8.3	0	0	0	0	0.0348837	0.3	0.015	8.8
P65	LP	0.620072	17.3	0.283154	7.9	0.0609319	1.7	0.336245	7.7	0.414847	9.5	0.0917031	2.1	0.929577	6.6	0.0286738	0.8	0.0742358	1.7	0.0704225	0.5	0.125	7.8
P65	Day 30	0.64875	51.9	0.26625	21.3	0.0075	0.6	0.381579	11.6	0.230263	7	0.0822368	2.5	0.956897	11.1	0.075	6	0.286184	8.7	0.0431035	0.5	0.087	11.9

## Sheet: Suppl_Table_6
Fig 3a; RNA; all T cells; all time points; nonCR vs CR							ADT; all T cells; all time points; nonCR vs CR								Fig 3i; RNA; Late; CAR+ vs LP							Fig 3i; RNA; Late; CAR+ vs CAR-							Fig 4g; RNA; all cell types; all time points; CRS vs nonCRS							ADT; all cell types; all time points; CRS vs nonCRS
Gene_name	log2FC	Pvalue	FDR	Time_point	Cell_identity		Gene_name	Gene_synonym	log2FC	Pvalue	FDR	Time_point	Cell_identity		Gene_name	log2FC	Pvalue	FDR	Time_point	Cell_identity		Gene_name	log2FC	Pvalue	FDR	Time_point	Cell_identity		Gene_name	log2FC	Pvalue	FDR	Time_point	Cell_identity		Gene_name	Gene_synonym	log2FC	Pvalue	FDR	Time_point	Cell_identity
RPS29	0.33984	2.8816e-28	1.0547e-23	LP	CD4.CTL.GNLY		CD45	PTPRC	-0.437565	6.1553e-63	3.9394e-61	LP	CD4.CTL.GNLY		CAR-BCMA	12.0692	3.266e-263	1.196e-258	Late	CD4		CAR-BCMA	12.3284	0	0	TRUE	CD4		RPS4Y1	-1.78612	5.3206e-65	1.9475e-60	LP	B-Cell Naive		CD45RA	CD45RA	0.484243	4.3396e-35	2.7773e-33	LP	B-Cell Naive
RPS4Y1	-1.44011	2.0089e-19	7.3528e-15	LP	CD4.CTL.GNLY		CD57	B3GAT1	-0.449064	7.3233e-67	4.6869e-65	Late	CD8.CM		GNLY	2.72336	2.049e-80	7.4999e-76	Late	CD4		GZMK	1.4011	8.3345e-48	3.0506e-43	TRUE	CD4		TSC22D3	-0.722353	2.3546e-34	8.6181e-30	LP	B-Cell Naive		CD62L	SELL	0.50332	5.7853e-72	3.7026e-70	LP	CD4.NaiveLike
FP236383.3	0.466433	8.2243e-17	3.0102e-12	LP	CD4.CTL.GNLY		CD38	CD38	0.375822	3.1212e-87	1.9975e-85	Late	CD8.EM		CST7	1.85104	1.605e-76	5.8747e-72	Late	CD4		CST7	0.919685	5.7127e-43	2.0909e-38	TRUE	CD4		EIF1AY	-1.91043	2.4636e-30	9.0173e-26	LP	B-Cell Naive		CD38	CD38	0.380433	1.1886e-10	7.6073e-09	LP	CD8.TEX
RPS27L	0.607889	1.026e-12	3.7553e-08	LP	CD4.CTL.GNLY		CD38	CD38	0.336018	6.4768e-73	4.1452e-71	Late	CD8.EMRA.1		GZMA	1.88475	7.6309e-73	2.7931e-68	Late	CD4		GNLY	1.24193	8.7771e-43	3.2126e-38	TRUE	CD4		AC004448.2	-1.43035	2.662e-29	9.7435e-25	LP	B-Cell Naive		CD28	CD28	-0.422696	5.016e-209	3.21e-207	LP	Mono CD14
CD74	-0.481566	1.792e-12	6.559e-08	LP	CD4.CTL.GNLY		CD57	B3GAT1	-0.698698	1.0942e-51	7.0027e-50	Late	CD8.NaiveLike		NKG7	1.4197	4.0912e-68	1.4975e-63	Late	CD4		CCL5	0.50746	1.0717e-36	3.9227e-32	TRUE	CD4		CXCR4	-0.662631	2.3538e-22	8.6154e-18	LP	B-Cell Naive		CD123	IL3RA	0.373548	7.52e-124	4.813e-122	LP	Mono CD16
RBM38	-0.673245	4.6702e-12	1.7094e-07	LP	CD4.CTL.GNLY		CD38	CD38	0.542656	1.4631e-70	9.3637e-69	Late	CD8.TEX		GZMK	2.99448	2.9493e-64	1.0795e-59	Late	CD4		GZMA	0.868985	3.032e-34	1.1098e-29	TRUE	CD4		JUND	-0.337986	9.3558e-19	3.4244e-14	LP	B-Cell Naive		CD45RA	CD45RA	0.338205	2.228e-121	1.426e-119	LP	NK
LAIR2	0.762004	7.5312e-12	2.7566e-07	LP	CD4.CTL.GNLY		CD62L	SELL	0.530511	1.0022e-51	6.4138e-50	Late	CD8.TEX		CCL5	1.29345	5.3849e-62	1.971e-57	Late	CD4		NKG7	0.460847	1.0219e-30	3.7404e-26	TRUE	CD4		RPS26	-0.735493	4.0695e-17	1.4895e-12	LP	B-Cell Naive		CD62L	SELL	0.415166	1.892e-100	1.2111e-98	LP	NK
FP671120.4	0.652571	1.0405e-11	3.8086e-07	LP	CD4.CTL.GNLY		CD69	CD69	-0.386223	2.1066e-48	1.3482e-46	Very Late	CD4.NaiveLike		CD74	1.49788	1.1548e-55	4.2269e-51	Late	CD4		TMSB10	-0.36343	2.6145e-21	9.5698e-17	TRUE	CD4		BTG1	-0.393239	5.3806e-17	1.9694e-12	LP	B-Cell Naive		CD40	TNFRSF5	-1.49743	1.776e-90	1.1366e-88	LP	Plasma cell
GZMK	-1.14334	2.4251e-11	8.8763e-07	LP	CD4.CTL.GNLY		CD57	B3GAT1	-0.32231	3.2298e-29	2.067e-27	Very Late	CD4.NaiveLike		LEF1	-2.71949	7.9907e-40	2.9248e-35	Late	CD4		RPS26	0.4056	2.7877e-21	1.0204e-16	TRUE	CD4		HLA-C	-0.344944	2.7036e-16	9.8958e-12	LP	B-Cell Naive		CD200	CD200	-1.84321	2.1144e-85	1.3532e-83	LP	Plasma cell
TRG-AS1	0.691376	2.7409e-11	1.0032e-06	LP	CD4.CTL.GNLY		CD57	B3GAT1	-0.479789	2.0359e-20	1.303e-18	Very Late	CD4.Treg		PRF1	2.00677	1.1269e-38	4.1246e-34	Late	CD4		FLT3LG	-1.0596	2.6795e-19	9.8076e-15	TRUE	CD4		PNRC1	-0.442797	6.2611e-15	2.2917e-10	LP	B-Cell Naive		CD319	SLAMF7	-1.52154	3.2791e-80	2.0986e-78	LP	Plasma cell
BCL3	-1.22709	1.7867e-10	6.5398e-06	LP	CD4.CTL.GNLY		CD244	CD244	-0.599222	1.287e-64	8.237e-63	Very Late	CD8.CM		RUNX3	1.34014	2.551e-37	9.3373e-33	Late	CD4		TIMP1	-1.36792	2.7151e-19	9.9377e-15	TRUE	CD4		KLF2	-0.544209	2.4892e-10	9.1111e-06	LP	B-Cell Naive		CD307	FCRL5	-1.50897	2.8955e-69	1.8531e-67	LP	Plasma cell
LINC02384	1.12352	2.3624e-10	8.6468e-06	LP	CD4.CTL.GNLY		CD69	CD69	-0.411238	3.76e-58	2.4064e-56	Very Late	CD8.CM		DUSP2	1.14645	1.6783e-36	6.1428e-32	Late	CD4		LTB	-0.354271	4.4113e-19	1.6146e-14	TRUE	CD4		SPIB	0.438607	4.3231e-10	1.5823e-05	LP	B-Cell Naive		CD28	CD28	-0.632429	1.3746e-60	8.7976e-59	LP	Plasma cell
DUSP2	-0.439841	3.5948e-10	1.3158e-05	LP	CD4.CTL.GNLY		CD57	B3GAT1	-0.337372	6.4429e-34	4.1234e-32	Very Late	CD8.CM		HLA-DPA1	1.2904	1.7516e-32	6.4111e-28	Late	CD4		PRF1	0.781112	3.739e-17	1.3685e-12	TRUE	CD4		HLA-B	0.595696	1.0145e-09	3.7134e-05	LP	B-Cell Naive		CD56	NCAM1	-0.861012	9.7736e-44	6.2551e-42	LP	Plasma cell
RNF213	0.387263	4.8661e-10	1.7811e-05	LP	CD4.CTL.GNLY		CD57	B3GAT1	-0.377429	9.2824e-94	5.9407e-92	Very Late	CD8.EM		CD81	1.23501	4.3761e-32	1.6017e-27	Late	CD4		CD81	0.669565	2.9866e-16	1.0932e-11	TRUE	CD4		PPP1R14A	1.29309	2.4153e-09	8.8406e-05	LP	B-Cell Naive		CD57	B3GAT1	-0.340541	4.6185e-31	2.9559e-29	LP	Plasma cell
DAZAP2	-0.34207	1.2524e-09	4.5841e-05	LP	CD4.CTL.GNLY		CD244	CD244	-0.416519	1.0047e-87	6.4301e-86	Very Late	CD8.EM		LITAF	1.17187	2.9388e-31	1.0757e-26	Late	CD4		DUSP2	0.65122	4.8323e-16	1.7687e-11	TRUE	CD4		CD79B	0.362468	3.5182e-09	0.00012877	LP	B-Cell Naive		CD38	CD38	-0.674778	4.0031e-35	2.562e-33	LP	gdT
TNFAIP3	-0.514426	5.1148e-09	0.00018721	LP	CD4.CTL.GNLY		CD38	CD38	0.450807	2.1227e-85	1.3585e-83	Very Late	CD8.EM		TCF7	-1.99096	1.4974e-30	5.4806e-26	Late	CD4		TMEM123	-1.03734	1.3514e-15	4.9462e-11	TRUE	CD4		KRT10	-0.630081	4.6808e-09	0.00017133	LP	B-Cell Naive		CD45RA	CD45RA	0.387841	8.5112e-24	5.4471e-22	LP	pDC
NFKBIA	-0.650861	5.5082e-09	0.00020161	LP	CD4.CTL.GNLY		CD69	CD69	-0.385134	4.861e-107	3.111e-105	Very Late	CD8.EMRA.1		HLA-B	0.492264	6.7442e-29	2.4685e-24	Late	CD4		PLEK	0.788721	8.3234e-15	3.0465e-10	TRUE	CD4		DUSP1	-0.511867	1.0263e-08	0.00037566	LP	B-Cell Naive		CD279	PD1	0.499211	1.6667e-37	1.0667e-35	Late	CD4.CTL.EOMES
KLRD1	1.00215	5.9266e-09	0.00021693	LP	CD4.CTL.GNLY		CD244	CD244	-0.369302	2.3825e-97	1.5248e-95	Very Late	CD8.EMRA.1		C12orf75	1.36144	1.7042e-28	6.2378e-24	Late	CD4		LITAF	0.591671	2.0521e-14	7.5111e-10	TRUE	CD4		HLA-DRB1	-0.327849	1.2056e-08	0.00044126	LP	B-Cell Naive		CD38	CD38	0.463553	9.4839e-25	6.0697e-23	Late	CD4.CTL.EOMES
ST6GAL1	0.422504	1.0664e-08	0.00039032	LP	CD4.CTL.GNLY		CD28	CD28	-0.525253	8.1296e-55	5.203e-53	Very Late	CD8.EMRA.2		RPS8	-0.669721	1.7768e-27	6.5035e-23	Late	CD4		PLP2	-0.886991	2.8144e-13	1.0301e-08	TRUE	CD4		SELL	-0.671178	2.3626e-08	0.00086475	LP	B-Cell Naive		CD95	FAS	0.400309	1.6154e-93	1.0339e-91	Late	CD4.NaiveLike
CD247	0.445915	2.7144e-08	0.00099352	LP	CD4.CTL.GNLY		CD69	CD69	-0.483156	3.2807e-46	2.0996e-44	Very Late	CD8.EMRA.2		GZMH	0.595959	2.273e-26	8.3195e-22	Late	CD4		KLRB1	-1.47476	4.4799e-13	1.6397e-08	TRUE	CD4		IL4R	-0.448979	8.7421e-08	0.00319978	LP	B-Cell Naive		CD8A	CD8A	0.338245	1.7101e-11	1.0945e-09	Late	CD8.EMRA.2
S100A8	1.44624	3.0452e-08	0.00111459	LP	CD4.CTL.GNLY		CD69	CD69	-0.417883	1.2017e-31	7.6906e-30	Very Late	CD8.NaiveLike		BCL2	-2.05894	3.6916e-26	1.3512e-21	Late	CD4		RUNX3	0.385398	5.2309e-13	1.9146e-08	TRUE	CD4		ISCU	-0.549334	5.5512e-07	0.0203186	LP	B-Cell Naive		CD57	B3GAT1	0.696515	8.3952e-25	5.3729e-23	Late	CD8.NaiveLike
ITGA4	0.388075	5.172e-08	0.00189304	LP	CD4.CTL.GNLY		CD127	IL7R	-0.350847	3.2149e-14	2.0575e-12	Very Late	CD8.NaiveLike		HLA-DPB1	1.25026	3.9613e-26	1.4499e-21	Late	CD4		CD74	0.435588	2.2507e-12	8.238e-08	TRUE	CD4		IER2	1.20652	9.3044e-07	0.0340559	LP	B-Cell Naive		CD62L	SELL	0.408955	3.7158e-06	0.00023781	Late	CD8.NaiveLike
S100A9	1.48768	8.431e-08	0.0030859	LP	CD4.CTL.GNLY		CD57	B3GAT1	-0.546128	1.5965e-47	1.0217e-45	Very Late	CD8.TEX		HLA-A	0.457817	4.7233e-26	1.7288e-21	Late	CD4		VIM	-0.406294	2.3957e-12	8.7689e-08	TRUE	CD4		AL139020.1	0.573694	1.3235e-06	0.0484418	LP	B-Cell Naive		CD45RA	CD45RA	0.614816	1.6005e-27	1.0243e-25	Late	gdT
KLRK1	1.14061	8.6986e-08	0.00318385	LP	CD4.CTL.GNLY		CD38	CD38	0.483665	4.5782e-36	2.93e-34	Very Late	CD8.TEX		PLEK	1.91237	1.1599e-25	4.2456e-21	Late	CD4		CCL4	0.870381	5.8049e-12	2.1247e-07	TRUE	CD4		AC004448.2	-2.93383	3.0924e-56	1.1319e-51	LP	CD4.CTL.EOMES		CD28	CD28	-0.542174	2.0785e-27	1.3302e-25	Late	gdT
PRF1	0.324105	9.8616e-08	0.00360955	LP	CD4.CTL.GNLY		CD69	CD69	-0.376052	1.1996e-24	7.6773e-23	Very Late	CD8.TEX		CYTOR	1.22113	1.0974e-24	4.0166e-20	Late	CD4		ALOX5AP	-0.650213	2.0532e-11	7.5151e-07	TRUE	CD4		RPS4Y1	-2.21786	2.2533e-34	8.2475e-30	LP	CD4.CTL.EOMES		CD57	B3GAT1	0.386219	1.335e-24	8.5438e-23	Late	gdT
C1orf162	-1.00286	1.0229e-07	0.00374391	LP	CD4.CTL.GNLY										INPP4B	-1.7617	3.4626e-24	1.2674e-19	Late	CD4		IFITM1	-0.339855	2.7492e-11	1.0063e-06	TRUE	CD4		TMSB4X	0.544986	1.4312e-28	5.2383e-24	LP	CD4.CTL.EOMES		CD38	CD38	-0.619447	2.7979e-77	1.7907e-75	Very Late	B-Cell Naive
OSER1	-0.664571	1.0523e-07	0.00385149	LP	CD4.CTL.GNLY										B2M	0.486724	9.6053e-24	3.5157e-19	Late	CD4		LEF1	-1.46909	3.6855e-11	1.349e-06	TRUE	CD4		EIF1	-0.816431	1.0571e-23	3.8693e-19	LP	CD4.CTL.EOMES		CD40	TNFRSF5	-0.748783	8.3426e-69	5.3393e-67	Very Late	B-Cell Naive
CMC1	0.813691	1.4471e-07	0.00529667	LP	CD4.CTL.GNLY										GZMB	1.98821	2.659e-23	9.7325e-19	Late	CD4		MCTP2	1.08088	4.1127e-11	1.5053e-06	TRUE	CD4		TNFAIP3	-1.27673	2.2262e-21	8.1484e-17	LP	CD4.CTL.EOMES		CD183	CXCR3	0.43595	5.9529e-41	3.8099e-39	Very Late	B-Cell Naive
AOAH	1.22883	2.5592e-07	0.00936722	LP	CD4.CTL.GNLY										MAP3K8	1.23127	5.575e-23	2.0406e-18	Late	CD4		PIM1	-1.20838	6.7625e-11	2.4752e-06	TRUE	CD4		RPS29	-0.551618	1.3547e-17	4.9583e-13	LP	CD4.CTL.EOMES		CD45RA	CD45RA	0.484056	1.0249e-35	6.5594e-34	Very Late	B-Cell Naive
CD5	-0.483403	3.9286e-07	0.0143794	LP	CD4.CTL.GNLY										PIM1	-1.84413	2.0058e-22	7.3416e-18	Late	CD4		C12orf75	0.640072	3.3429e-10	1.2236e-05	TRUE	CD4		RPL36	-0.416379	1.7883e-17	6.5456e-13	LP	CD4.CTL.EOMES		CD28	CD28	-0.491356	9.2723e-33	5.9343e-31	Very Late	B-Cell Naive
CD7	-0.70783	8.3175e-07	0.0304435	LP	CD4.CTL.GNLY										HLA-DRB1	1.23503	1.1183e-21	4.0933e-17	Late	CD4		BCL2	-0.962393	4.1068e-10	1.5032e-05	TRUE	CD4		MYL12A	0.647475	5.7812e-17	2.116e-12	LP	CD4.CTL.EOMES		CD81	CD81	-0.492928	2.4859e-16	1.591e-14	Very Late	B-Cell Naive
EVL	0.328542	1.3392e-06	0.0490177	LP	CD4.CTL.GNLY										PABPC1	-0.646644	1.1823e-21	4.3275e-17	Late	CD4		LYST	0.865544	4.9639e-10	1.8169e-05	TRUE	CD4		DUSP1	-1.65946	1.1389e-16	4.1685e-12	LP	CD4.CTL.EOMES		CD28	CD28	-0.327793	3.3261e-30	2.1287e-28	Very Late	CD4.CTL.GNLY
ISG15	1.05058	1.0534e-42	3.8555e-38	LP	CD4.NaiveLike										CCL4	2.20189	1.9279e-21	7.0565e-17	Late	CD4		AQP3	-1.0348	5.6975e-10	2.0854e-05	TRUE	CD4		RPL37	-0.381891	2.0666e-15	7.564e-11	LP	CD4.CTL.EOMES		CD38	CD38	-0.637787	2.2175e-85	1.4192e-83	Very Late	CD8.EMRA.2
IFI6	0.969149	2.9477e-35	1.0789e-30	LP	CD4.NaiveLike										TMEM123	-1.27416	6.6946e-21	2.4504e-16	Late	CD4		PABPC1	-0.393483	6.9621e-10	2.5483e-05	TRUE	CD4		ZFP36L2	-0.977498	2.2136e-15	8.1022e-11	LP	CD4.CTL.EOMES		CD11C	ITGAX	-0.426279	4.6557e-23	2.9796e-21	Very Late	CD8.EMRA.2
LY6E	0.397782	7.0458e-33	2.5789e-28	LP	CD4.NaiveLike										UBC	0.48854	1.0164e-20	3.7201e-16	Late	CD4		RORA	-0.994736	9.3214e-10	3.4118e-05	TRUE	CD4		CEMIP2	-1.09076	2.4766e-14	9.0649e-10	LP	CD4.CTL.EOMES		CD28	CD28	-0.334034	5.7804e-92	3.6995e-90	Very Late	Mono CD14
MX1	1.02528	1.8721e-30	6.8524e-26	LP	CD4.NaiveLike										RPL22	-0.523122	2.6588e-20	9.7316e-16	Late	CD4		ITGB1	-0.634711	4.2156e-09	0.0001543	TRUE	CD4		H3F3B	-0.536797	7.776e-14	2.8462e-09	LP	CD4.CTL.EOMES		CD45RA	CD45RA	0.585869	3.2023e-96	2.0494e-94	Very Late	NK
XAF1	0.985433	3.6409e-29	1.3327e-24	LP	CD4.NaiveLike										RPL32	-0.497393	8.5364e-20	3.1245e-15	Late	CD4		SELL	-1.14733	7.504e-09	0.00027466	TRUE	CD4		PIM3	-1.28078	1.2079e-13	4.421e-09	LP	CD4.CTL.EOMES		CD57	B3GAT1	0.48071	3.1811e-71	2.0359e-69	Very Late	NK CD56bright
AC004448.2	0.457819	5.8179e-27	2.1295e-22	LP	CD4.NaiveLike										SRGN	0.632305	1.9766e-19	7.2348e-15	Late	CD4		NPDC1	-0.516775	8.5733e-09	0.0003138	TRUE	CD4		RPL39	-0.375415	1.2373e-13	4.5288e-09	LP	CD4.CTL.EOMES		CD28	CD28	-0.489944	5.8052e-47	3.7153e-45	Very Late	NK CD56bright
IRF7	1.03631	2.8402e-24	1.0396e-19	LP	CD4.NaiveLike										PLAAT4	0.923627	7.1871e-19	2.6306e-14	Late	CD4		CMC1	0.884178	1.9685e-08	0.00072051	TRUE	CD4		GNLY	1.14073	1.9217e-13	7.0337e-09	LP	CD4.CTL.EOMES		CD45RA	CD45RA	0.871288	3.4584e-45	2.2134e-43	Very Late	NK CD56bright
RBFOX2	0.344835	6.2831e-22	2.2997e-17	LP	CD4.NaiveLike										RPL39	-0.49732	9.7064e-19	3.5527e-14	Late	CD4		CRIP1	-0.350539	2.3677e-08	0.00086664	TRUE	CD4		RPS19	-0.451598	4.7573e-13	1.7413e-08	LP	CD4.CTL.EOMES		CD45	PTPRC	0.343144	1.1175e-23	7.1522e-22	Very Late	cDC
NFKBIA	0.429869	7.268e-21	2.6602e-16	LP	CD4.NaiveLike										ITGB2	0.677932	1.6077e-18	5.8845e-14	Late	CD4		TTC39C	-0.890398	2.8877e-08	0.00105696	TRUE	CD4		DUSP2	-1.017	8.3524e-13	3.0572e-08	LP	CD4.CTL.EOMES		CD4	CD4	0.381033	4.224e-22	2.7033e-20	Very Late	cDC
EPSTI1	0.749432	1.5719e-18	5.7533e-14	LP	CD4.NaiveLike										FHIT	-2.0703	2.6425e-18	9.6721e-14	Late	CD4		EML4	-0.820013	5.9554e-08	0.0021798	TRUE	CD4		PRF1	0.949227	2.0508e-12	7.5062e-08	LP	CD4.CTL.EOMES		CD141	THBD	0.37571	4.8682e-20	3.1156e-18	Very Late	cDC
EIF2AK2	0.677647	1.7309e-18	6.3356e-14	LP	CD4.NaiveLike										HLA-DRA	1.60913	2.8838e-18	1.0555e-13	Late	CD4		CBLB	0.592695	8.2765e-08	0.00302935	TRUE	CD4		DDIT4	-1.6093	3.2598e-12	1.1931e-07	LP	CD4.CTL.EOMES
S100A8	0.492291	2.8428e-16	1.0405e-11	LP	CD4.NaiveLike										HLA-C	0.398357	4.797e-18	1.7558e-13	Late	CD4		KLF3	-0.606396	7.1678e-07	0.0262355	TRUE	CD4		SRGN	-0.527823	2.4789e-11	9.0732e-07	LP	CD4.CTL.EOMES
PTGER2	0.440328	1.9413e-13	7.1057e-09	LP	CD4.NaiveLike										CD7	-1.35412	6.8718e-18	2.5152e-13	Late	CD4		CAR-BCMA	13.1632	0	0	TRUE	CD8		RPS21	-0.359988	3.4887e-11	1.2769e-06	LP	CD4.CTL.EOMES
ARMH1	-0.608763	4.3304e-12	1.585e-07	LP	CD4.NaiveLike										TPT1	-0.541436	9.5177e-18	3.4837e-13	Late	CD4		GNLY	0.762788	2.4185e-93	8.852e-89	TRUE	CD8		TXNIP	-0.821879	3.9681e-11	1.4524e-06	LP	CD4.CTL.EOMES
STAT1	0.323328	6.6997e-11	2.4522e-06	LP	CD4.NaiveLike										VIM	-0.565971	2.2394e-17	8.1966e-13	Late	CD4		COTL1	-0.685809	1.5376e-28	5.6279e-24	TRUE	CD8		LCK	0.676013	4.5576e-11	1.6682e-06	LP	CD4.CTL.EOMES
ITM2A	-0.368068	1.104e-10	4.0408e-06	LP	CD4.NaiveLike										SELL	-1.64551	3.4547e-17	1.2645e-12	Late	CD4		GZMB	0.546831	1.0377e-25	3.7983e-21	TRUE	CD8		PMAIP1	-1.31429	4.8567e-11	1.7776e-06	LP	CD4.CTL.EOMES
TRIM22	0.360147	1.966e-10	7.1961e-06	LP	CD4.NaiveLike										FLT3LG	-1.04041	3.5267e-17	1.2909e-12	Late	CD4		CD27	0.538252	5.0042e-17	1.8316e-12	TRUE	CD8		SUN2	1.08082	6.344e-11	2.322e-06	LP	CD4.CTL.EOMES
CARD16	0.35637	3.0265e-09	0.00011077	LP	CD4.NaiveLike										LYAR	1.16118	4.3812e-17	1.6036e-12	Late	CD4		RORA	-0.597669	1.0658e-14	3.9011e-10	TRUE	CD8		CNBP	0.819122	1.3632e-10	4.9897e-06	LP	CD4.CTL.EOMES
RHBDD2	-0.438409	2.7168e-08	0.00099441	LP	CD4.NaiveLike										LYST	1.86864	4.6459e-17	1.7005e-12	Late	CD4		NFKBIA	0.389977	1.9546e-10	7.1542e-06	TRUE	CD8		ZFP36	-1.15763	1.6985e-10	6.2168e-06	LP	CD4.CTL.EOMES
MGAT5	0.414069	1.0727e-07	0.00392618	LP	CD4.NaiveLike										IL7R	-1.11491	4.8112e-17	1.761e-12	Late	CD4		LINC02446	-0.492422	7.7674e-09	0.0002843	TRUE	CD8		JUND	-0.600282	3.1272e-10	1.1446e-05	LP	CD4.CTL.EOMES
SH3YL1	0.444636	5.1988e-07	0.0190285	LP	CD4.NaiveLike										LTB	-0.338361	6.5894e-17	2.4119e-12	Late	CD4		CYTOR	0.368259	8.1207e-09	0.00029723	TRUE	CD8		RPL37A	-0.379185	3.6354e-10	1.3306e-05	LP	CD4.CTL.EOMES
DDX21	0.330961	7.6252e-07	0.0279098	LP	CD4.NaiveLike										RPS18	-0.52164	6.8227e-17	2.4972e-12	Late	CD4		HLA-DRA	-0.447683	1.4879e-08	0.0005446	TRUE	CD8		CD69	-1.06789	5.7637e-10	2.1096e-05	LP	CD4.CTL.EOMES
MT-CYB	-0.580521	1.2696e-27	4.6471e-23	LP	CD8.CM										PFN1	0.489771	7.4495e-17	2.7267e-12	Late	CD4		KLF3	-0.44227	5.3775e-08	0.00196828	TRUE	CD8		GZMA	0.553535	6.4051e-10	2.3444e-05	LP	CD4.CTL.EOMES
MT-ND4L	-0.6536	4.4502e-26	1.6289e-21	LP	CD8.CM										RPL4	-0.522707	1.7578e-16	6.4341e-12	Late	CD4		SELL	-0.51535	5.4184e-08	0.00198323	TRUE	CD8		RIPOR2	0.841485	1.1914e-09	4.3606e-05	LP	CD4.CTL.EOMES
MT-ATP8	-0.792902	4.1946e-25	1.5353e-20	LP	CD8.CM										RPLP2	-0.414195	2.2893e-16	8.3791e-12	Late	CD4		TCF7	-0.56248	2.7766e-07	0.010163	TRUE	CD8		IL2RG	0.394592	1.2094e-09	4.4265e-05	LP	CD4.CTL.EOMES
MT-CO1	-0.536022	2.6045e-24	9.5332e-20	LP	CD8.CM										MT2A	0.679139	1.1322e-15	4.144e-11	Late	CD4		LYST	0.351893	6.7005e-07	0.0245253	TRUE	CD8		SBDS	-1.32481	1.3802e-09	5.0518e-05	LP	CD4.CTL.EOMES
MT-CO3	-0.472992	1.4218e-19	5.2041e-15	LP	CD8.CM										LGALS1	0.650138	1.8333e-15	6.7101e-11	Late	CD4		AOAH	-0.359472	7.2335e-07	0.0264759	TRUE	CD8		SKAP1	0.952382	1.98e-09	7.2471e-05	LP	CD4.CTL.EOMES
MT-CO2	-0.479682	3.8302e-19	1.4019e-14	LP	CD8.CM										FGFBP2	1.00352	1.9963e-15	7.3067e-11	Late	CD4		AC004687.1	0.381782	8.1462e-07	0.0298169	TRUE	CD8		GZMB	0.795441	3.1272e-09	0.00011446	LP	CD4.CTL.EOMES
GNLY	-0.727074	3.7595e-18	1.3761e-13	LP	CD8.CM										S100A4	0.362051	2.08e-15	7.6133e-11	Late	CD4		GLIPR2	-0.357873	8.4177e-07	0.0308105	TRUE	CD8		CD5	-0.634901	3.6884e-09	0.000135	LP	CD4.CTL.EOMES
MT-ND5	-0.455747	6.0939e-15	2.2305e-10	LP	CD8.CM										RPL36A	-0.634907	2.7653e-15	1.0121e-10	Late	CD4									DUSP5	-1.12776	4.2013e-09	0.00015378	LP	CD4.CTL.EOMES
MT-ND3	-0.495835	1.3659e-14	4.9995e-10	LP	CD8.CM										AQP3	-1.3096	2.9542e-15	1.0813e-10	Late	CD4									DNAJB6	-0.7082	5.2985e-09	0.00019393	LP	CD4.CTL.EOMES
MT-ND1	-0.442014	4.3716e-14	1.6001e-09	LP	CD8.CM										H3F3B	0.404487	3.0289e-15	1.1086e-10	Late	CD4									RPL12	-0.37185	5.3064e-09	0.00019422	LP	CD4.CTL.EOMES
CD8B2	0.649972	6.8398e-14	2.5035e-09	LP	CD8.CM										PRKCQ-AS1	-1.63017	3.5638e-15	1.3044e-10	Late	CD4									PNRC1	-0.55164	6.6639e-09	0.00024391	LP	CD4.CTL.EOMES
RSRP1	-0.400342	3.9842e-11	1.4583e-06	LP	CD8.CM										BACH2	-2.73859	6.6848e-15	2.4468e-10	Late	CD4									GIMAP7	0.701466	6.8247e-09	0.0002498	LP	CD4.CTL.EOMES
HLA-DRB5	-0.659066	6.449e-11	2.3605e-06	LP	CD8.CM										FYB1	-0.768666	1.603e-14	5.8675e-10	Late	CD4									IL32	0.363312	6.9087e-09	0.00025287	LP	CD4.CTL.EOMES
HIST1H4C	0.629727	3.4593e-10	1.2662e-05	LP	CD8.CM										EEF2	-0.396126	2.006e-14	7.3423e-10	Late	CD4									CCL5	0.369785	1.029e-08	0.00037665	LP	CD4.CTL.EOMES
MT-ND4	-0.330452	5.1196e-10	1.8739e-05	LP	CD8.CM										MCTP2	1.70258	2.2281e-14	8.1554e-10	Late	CD4									MGST3	1.25164	1.1038e-08	0.00040402	LP	CD4.CTL.EOMES
ITGB2-AS1	-0.535021	7.5593e-09	0.00027669	LP	CD8.CM										TIMP1	-1.05955	3.7568e-14	1.3751e-09	Late	CD4									AOAH	1.81082	1.1632e-08	0.00042576	LP	CD4.CTL.EOMES
PDE4D	0.452619	1.1833e-08	0.00043311	LP	CD8.CM										PPDPF	0.570628	5.9473e-14	2.1768e-09	Late	CD4									RBM39	-0.765005	1.4855e-08	0.00054373	LP	CD4.CTL.EOMES
SLC2A3	-0.398052	1.6022e-08	0.00058644	LP	CD8.CM										RPL9	-0.461743	6.6637e-14	2.4391e-09	Late	CD4									RPL41	-0.341602	1.9052e-08	0.00069733	LP	CD4.CTL.EOMES
HLA-DQB1	-0.569507	2.0137e-08	0.00073707	LP	CD8.CM										GAPDH	0.508305	8.5841e-14	3.1419e-09	Late	CD4									EML4	-0.457568	2.0191e-08	0.00073903	LP	CD4.CTL.EOMES
RAB5IF	0.577299	3.2218e-08	0.00117925	LP	CD8.CM										RPL13	-0.429033	8.9983e-14	3.2936e-09	Late	CD4									RNF125	-0.937681	2.178e-08	0.00079721	LP	CD4.CTL.EOMES
ATG2A	-0.502868	3.6682e-08	0.00134264	LP	CD8.CM										MYL6	0.466459	1.1496e-13	4.2078e-09	Late	CD4									MAP3K8	-1.10337	2.2763e-08	0.00083315	LP	CD4.CTL.EOMES
CEBPB	0.482395	7.8477e-08	0.00287242	LP	CD8.CM										SUSD3	-1.93637	1.5766e-13	5.7705e-09	Late	CD4									GIMAP5	1.29124	2.6614e-08	0.00097413	LP	CD4.CTL.EOMES
AC004687.1	-0.548619	1.1483e-07	0.00420308	LP	CD8.CM										PIM2	-1.39684	4.8661e-13	1.7811e-08	Late	CD4									RUNX3	-0.852953	3.1167e-08	0.00114076	LP	CD4.CTL.EOMES
ZFP36	0.493883	3.2909e-07	0.0120452	LP	CD8.CM										LINC00861	-0.982227	5.5976e-13	2.0488e-08	Late	CD4									NKG7	0.347291	3.1902e-08	0.00116768	LP	CD4.CTL.EOMES
IFI6	0.425024	5.3691e-07	0.019652	LP	CD8.CM										RCAN3	-1.05506	2.2562e-12	8.2583e-08	Late	CD4									PBX4	-1.46393	3.5612e-08	0.00130349	LP	CD4.CTL.EOMES
OGT	-0.467637	5.6333e-07	0.0206188	LP	CD8.CM										EVL	-0.454382	2.7885e-12	1.0207e-07	Late	CD4									SOD2	-1.04421	3.6594e-08	0.00133942	LP	CD4.CTL.EOMES
XAF1	0.624561	7.0199e-07	0.0256942	LP	CD8.CM										TGFBR3	1.10678	4.1236e-12	1.5093e-07	Late	CD4									UCP2	0.773728	3.8597e-08	0.00141271	LP	CD4.CTL.EOMES
RBFOX2	0.331797	1.9119e-32	6.9978e-28	LP	CD8.EM										EID1	0.8632	4.1931e-12	1.5347e-07	Late	CD4									PDE4B	-1.3029	4.1211e-08	0.00150842	LP	CD4.CTL.EOMES
GNLY	-1.03977	5.2148e-28	1.9087e-23	LP	CD8.EM										RPL34	-0.41916	4.2734e-12	1.5642e-07	Late	CD4									MT2A	-0.848475	4.2075e-08	0.00154002	LP	CD4.CTL.EOMES
RPS4Y1	0.389883	3.2116e-23	1.1755e-18	LP	CD8.EM										RPS3A	-0.536137	4.9535e-12	1.8131e-07	Late	CD4									LINC01578	-0.511259	5.2184e-08	0.00191005	LP	CD4.CTL.EOMES
ISG15	0.597119	2.2145e-15	8.1057e-11	LP	CD8.EM										H3F3A	0.407743	4.9956e-12	1.8285e-07	Late	CD4									HOPX	1.10714	6.5001e-08	0.00237918	LP	CD4.CTL.EOMES
XAF1	0.700198	1.5296e-14	5.5986e-10	LP	CD8.EM										MYC	-1.74685	5.4671e-12	2.0011e-07	Late	CD4									DDX3Y	-2.41421	9.8013e-08	0.00358747	LP	CD4.CTL.EOMES
IFI6	0.752921	1.2532e-12	4.587e-08	LP	CD8.EM										PLP2	-1.08588	9.5927e-12	3.5111e-07	Late	CD4									NFKBIA	-0.703793	1.0176e-07	0.00372447	LP	CD4.CTL.EOMES
DDIT4	-0.569152	5.3653e-12	1.9638e-07	LP	CD8.EM										TBX21	1.16559	9.828e-12	3.5973e-07	Late	CD4									IL7R	0.45447	1.0329e-07	0.0037807	LP	CD4.CTL.EOMES
FP671120.4	0.428622	2.8281e-09	0.00010352	LP	CD8.EM										EFHD2	0.520303	1.1022e-11	4.0342e-07	Late	CD4									S100A11	0.612898	1.0338e-07	0.00378388	LP	CD4.CTL.EOMES
MT-CYB	-0.363226	1.3956e-08	0.00051081	LP	CD8.EM										RPS21	-0.3778	1.1392e-11	4.1698e-07	Late	CD4									HLA-DPA1	0.70711	1.0781e-07	0.00394596	LP	CD4.CTL.EOMES
PMAIP1	0.523813	1.737e-07	0.00635769	LP	CD8.EM										RPL41	-0.458122	1.386e-11	5.073e-07	Late	CD4									CCDC59	-0.970441	1.1665e-07	0.00426966	LP	CD4.CTL.EOMES
HLA-DQA1	-0.436045	2.4064e-07	0.00880776	LP	CD8.EM										RPL37	-0.35606	1.5317e-11	5.6065e-07	Late	CD4									ANKRD44	0.818894	1.3528e-07	0.00495137	LP	CD4.CTL.EOMES
PRKX	-0.377702	2.7612e-07	0.0101065	LP	CD8.EM										EEF1G	-0.485043	1.9807e-11	7.2497e-07	Late	CD4									HERPUD1	-0.902414	1.4043e-07	0.00514011	LP	CD4.CTL.EOMES
GNLY	-0.836757	1.1745e-41	4.2989e-37	LP	CD8.EMRA.1										CYBA	0.467186	2.7868e-11	1.02e-06	Late	CD4									HLA-DQA1	0.79811	1.413e-07	0.00517177	LP	CD4.CTL.EOMES
IL7R	0.561931	2.464e-29	9.0187e-25	LP	CD8.EMRA.1										DGKA	-1.1982	2.8397e-11	1.0394e-06	Late	CD4									RHOH	-0.713317	1.4664e-07	0.00536742	LP	CD4.CTL.EOMES
TIGIT	0.805519	1.5769e-26	5.7719e-22	LP	CD8.EMRA.1										PAXX	0.732092	3.7741e-11	1.3814e-06	Late	CD4									TENT5C	-0.78831	1.5751e-07	0.00576534	LP	CD4.CTL.EOMES
CXCR4	0.377717	1.4696e-24	5.379e-20	LP	CD8.EMRA.1										RPS6	-0.478535	3.8033e-11	1.3921e-06	Late	CD4									NR4A2	-1.44656	2.0386e-07	0.00746179	LP	CD4.CTL.EOMES
HLA-DRB5	-0.543333	1.6849e-20	6.167e-16	LP	CD8.EMRA.1										SH3BGRL3	0.352761	3.8147e-11	1.3962e-06	Late	CD4									CCDC6	-1.54902	2.3737e-07	0.00868821	LP	CD4.CTL.EOMES
IFI6	0.753266	7.9514e-17	2.9104e-12	LP	CD8.EMRA.1										MIR4435-2HG	1.23219	3.8815e-11	1.4207e-06	Late	CD4									LEPROTL1	-0.54693	2.4788e-07	0.00907292	LP	CD4.CTL.EOMES
JUNB	0.382901	3.2627e-15	1.1942e-10	LP	CD8.EMRA.1										AC004687.1	0.992497	5.8267e-11	2.1327e-06	Late	CD4									RPLP1	-0.343307	2.4949e-07	0.0091317	LP	CD4.CTL.EOMES
MT-CYB	-0.43946	8.2865e-15	3.033e-10	LP	CD8.EMRA.1										HERPUD1	0.801737	7.8065e-11	2.8573e-06	Late	CD4									IKZF3	1.14512	2.6686e-07	0.00976775	LP	CD4.CTL.EOMES
FP671120.4	0.368191	1.4175e-13	5.1884e-09	LP	CD8.EMRA.1										VAMP2	0.534419	1.2523e-10	4.5835e-06	Late	CD4									RBM38	-0.804338	3.0349e-07	0.0111082	LP	CD4.CTL.EOMES
HLA-DQA1	-0.664203	4.3916e-12	1.6074e-07	LP	CD8.EMRA.1										GZMM	0.704123	1.3122e-10	4.803e-06	Late	CD4									FOS	-1.49267	3.14e-07	0.011493	LP	CD4.CTL.EOMES
ALOX5AP	0.571027	1.2921e-11	4.7294e-07	LP	CD8.EMRA.1										TTC39C	-1.13518	1.321e-10	4.8352e-06	Late	CD4									S1PR5	1.49923	3.9282e-07	0.0143779	LP	CD4.CTL.EOMES
LAIR2	0.475911	2.1974e-11	8.0428e-07	LP	CD8.EMRA.1										IL32	0.397022	1.4203e-10	5.1984e-06	Late	CD4									ELF1	-0.645268	4.9057e-07	0.0179559	LP	CD4.CTL.EOMES
DYNLL1	0.480378	2.6526e-11	9.709e-07	LP	CD8.EMRA.1										SH2D2A	1.0184	1.4237e-10	5.2111e-06	Late	CD4									GZMH	0.550669	5.0065e-07	0.0183246	LP	CD4.CTL.EOMES
PLAC8	0.495527	5.4987e-11	2.0126e-06	LP	CD8.EMRA.1										RPL5	-0.446082	1.5147e-10	5.5442e-06	Late	CD4									PELI1	-1.05509	5.2523e-07	0.0192245	LP	CD4.CTL.EOMES
S100A9	0.689962	2.0806e-10	7.6155e-06	LP	CD8.EMRA.1										ADD3	-0.607886	1.7886e-10	6.5468e-06	Late	CD4									BTG1	-0.705064	6.2406e-07	0.022842	LP	CD4.CTL.EOMES
JUN	0.519635	4.0278e-10	1.4743e-05	LP	CD8.EMRA.1										CTSC	0.944362	1.9548e-10	7.155e-06	Late	CD4									PIK3R1	-0.67703	7.2562e-07	0.0265592	LP	CD4.CTL.EOMES
PTMS	-0.410701	1.6581e-09	6.0691e-05	LP	CD8.EMRA.1										GSTP1	0.841964	2.7177e-10	9.9475e-06	Late	CD4									ATG2A	-1.2115	8.0568e-07	0.0294894	LP	CD4.CTL.EOMES
SAMSN1	0.513968	1.8434e-09	6.7474e-05	LP	CD8.EMRA.1										ARHGAP15	-0.815017	4.1612e-10	1.5231e-05	Late	CD4									PTPRC	0.334546	9.3837e-07	0.0343463	LP	CD4.CTL.EOMES
MAD1L1	0.4338	2.5964e-09	9.5033e-05	LP	CD8.EMRA.1										RPL7	-0.368038	4.7552e-10	1.7405e-05	Late	CD4									DHRS7	0.86956	9.967e-07	0.0364812	LP	CD4.CTL.EOMES
MT-ND4L	-0.447777	6.1125e-09	0.00022373	LP	CD8.EMRA.1										PPIB	0.452249	5.1107e-10	1.8706e-05	Late	CD4									NUCB2	1.11434	1.1094e-06	0.0406046	LP	CD4.CTL.EOMES
SELL	0.766574	6.7728e-09	0.0002479	LP	CD8.EMRA.1										RPL36	-0.358243	6.1666e-10	2.2571e-05	Late	CD4									PRKY	-1.38661	1.1994e-06	0.0438996	LP	CD4.CTL.EOMES
MT-ND3	-0.396617	9.9537e-09	0.00036432	LP	CD8.EMRA.1										FKBP5	-1.26745	6.959e-10	2.5471e-05	Late	CD4									AC004448.2	0.442877	1.6373e-17	5.9927e-13	LP	CD4.CTL.GNLY
LINC02446	-0.35454	2.1013e-08	0.00076914	LP	CD8.EMRA.1										PDIA3	0.625613	7.483e-10	2.7389e-05	Late	CD4									GNLY	0.602097	6.8357e-15	2.502e-10	LP	CD4.CTL.GNLY
GTF3C1	-0.431535	5.2345e-08	0.00191593	LP	CD8.EMRA.1										APOBEC3G	1.03343	7.6427e-10	2.7974e-05	Late	CD4									CXCR4	-0.33533	5.5343e-12	2.0257e-07	LP	CD4.CTL.GNLY
EIF2AK2	0.459142	1.3048e-07	0.00477571	LP	CD8.EMRA.1										RPS12	-0.457824	8.054e-10	2.9479e-05	Late	CD4									PRDM1	-0.611259	2.4481e-10	8.9607e-06	LP	CD4.CTL.GNLY
TSPAN32	-0.388718	1.5315e-07	0.00560562	LP	CD8.EMRA.1										ZBTB20	-1.56518	8.2874e-10	3.0334e-05	Late	CD4									HERPUD1	-0.338301	4.3993e-10	1.6102e-05	LP	CD4.CTL.GNLY
DUSP1	0.381144	9.4028e-07	0.0344163	LP	CD8.EMRA.1										IFITM1	-0.342154	8.7239e-10	3.1931e-05	Late	CD4									ITM2A	-0.414641	6.91e-10	2.5292e-05	LP	CD4.CTL.GNLY
IFI6	1.0649	1.2923e-53	4.7301e-49	LP	CD8.EMRA.2										CD2	0.697761	1.1266e-09	4.1238e-05	Late	CD4									HOPX	0.51407	1.4811e-09	5.421e-05	LP	CD4.CTL.GNLY
XAF1	1.22204	2.3951e-43	8.7665e-39	LP	CD8.EMRA.2										SERINC5	-1.64106	1.2661e-09	4.6343e-05	Late	CD4									RPS4Y1	-1.0475	6.4109e-09	0.00023465	LP	CD4.CTL.GNLY
IL32	0.392975	4.3368e-39	1.5874e-34	LP	CD8.EMRA.2										MBNL1	-0.637259	1.2754e-09	4.6682e-05	Late	CD4									MT-ND3	0.589591	1.1739e-08	0.00042966	LP	CD4.CTL.GNLY
IRF7	1.24928	2.6758e-37	9.7938e-33	LP	CD8.EMRA.2										RPL21	-0.486547	1.2828e-09	4.6952e-05	Late	CD4									TXNIP	-0.360352	2.3424e-08	0.00085738	LP	CD4.CTL.GNLY
GNLY	-0.523337	9.2866e-36	3.3991e-31	LP	CD8.EMRA.2										ICAM2	-1.05807	1.6108e-09	5.8959e-05	Late	CD4									MT-ND5	0.487692	3.8585e-08	0.00141227	LP	CD4.CTL.GNLY
ISG15	0.936042	1.4516e-35	5.3132e-31	LP	CD8.EMRA.2										PDE4D	0.915912	1.7992e-09	6.5855e-05	Late	CD4									MT-ATP8	0.614924	5.268e-08	0.0019282	LP	CD4.CTL.GNLY
AC004448.2	0.545166	9.8732e-34	3.6138e-29	LP	CD8.EMRA.2										HLA-DRB5	0.947	2.0581e-09	7.5331e-05	Late	CD4									CEBPB	-0.372687	2.2078e-07	0.00808096	LP	CD4.CTL.GNLY
S100A11	0.890535	1.9357e-32	7.0852e-28	LP	CD8.EMRA.2										HMGB1	0.442919	2.3601e-09	8.6385e-05	Late	CD4									AC004687.1	0.666201	2.3892e-07	0.00874479	LP	CD4.CTL.GNLY
MX1	1.4513	2.2332e-31	8.1738e-27	LP	CD8.EMRA.2										EEF1B2	-0.479047	2.4578e-09	8.996e-05	Late	CD4									AKT3	0.385469	5.1934e-07	0.0190088	LP	CD4.CTL.GNLY
KIR2DL3	-0.887604	5.2261e-31	1.9129e-26	LP	CD8.EMRA.2										ID2	0.651787	3.2713e-09	0.00011974	Late	CD4									S100A4	-0.59108	6.6071e-46	2.4183e-41	LP	CD4.NaiveLike
PTPRCAP	0.36076	2.7622e-25	1.011e-20	LP	CD8.EMRA.2										RPS28	-0.348742	3.5087e-09	0.00012843	Late	CD4									S100A11	-0.50003	5.0997e-33	1.8666e-28	LP	CD4.NaiveLike
BST2	0.620503	1.1969e-24	4.3808e-20	LP	CD8.EMRA.2										MRPL10	1.14395	3.5759e-09	0.00013088	Late	CD4									S100A10	-0.478177	1.7966e-29	6.5759e-25	LP	CD4.NaiveLike
LY6E	0.451327	7.5025e-23	2.7461e-18	LP	CD8.EMRA.2										APOO	-0.517424	4.1718e-09	0.0001527	Late	CD4									RPS4Y1	-0.563325	3.9358e-29	1.4406e-24	LP	CD4.NaiveLike
KIR2DL1	-1.4591	8.5863e-23	3.1428e-18	LP	CD8.EMRA.2										CLEC2B	0.550874	4.2735e-09	0.00015642	Late	CD4									ARMH1	0.800106	1.705e-25	6.2406e-21	LP	CD4.NaiveLike
SIT1	1.20089	8.1053e-19	2.9667e-14	LP	CD8.EMRA.2										POMP	0.801527	7.0432e-09	0.0002578	Late	CD4									ANXA1	-0.361969	2.451e-24	8.9711e-20	LP	CD4.NaiveLike
EIF2AK2	0.669438	1.526e-18	5.5854e-14	LP	CD8.EMRA.2										CTSW	0.418867	9.6178e-09	0.00035203	Late	CD4									TCF7	0.440571	6.7826e-23	2.4826e-18	LP	CD4.NaiveLike
GIMAP1	1.11405	2.0787e-16	7.6084e-12	LP	CD8.EMRA.2										LINC01871	0.959793	9.7781e-09	0.0003579	Late	CD4									LGALS1	-0.607168	1.8587e-22	6.8033e-18	LP	CD4.NaiveLike
CX3CR1	1.11544	9.4776e-16	3.469e-11	LP	CD8.EMRA.2										PLAC8	-1.74192	1.5463e-08	0.00056598	Late	CD4									IL32	-0.354471	2.9453e-22	1.078e-17	LP	CD4.NaiveLike
CIRBP	-0.454012	9.5351e-16	3.49e-11	LP	CD8.EMRA.2										SEPTIN9	-0.497151	1.6672e-08	0.00061024	Late	CD4									RPS26	-0.479184	7.1384e-22	2.6128e-17	LP	CD4.NaiveLike
S100A8	1.13732	1.1968e-15	4.3804e-11	LP	CD8.EMRA.2										SRRT	1.156	2.0363e-08	0.00074534	Late	CD4									SH3BGRL3	-0.365428	2.5338e-21	9.2741e-17	LP	CD4.NaiveLike
CD27	1.59275	4.3747e-15	1.6012e-10	LP	CD8.EMRA.2										SOCS3	-2.11491	2.0518e-08	0.00075098	Late	CD4									EMP3	-0.38857	9.0933e-20	3.3283e-15	LP	CD4.NaiveLike
S100A9	0.915584	1.2065e-14	4.4161e-10	LP	CD8.EMRA.2										RHOC	1.04085	2.0885e-08	0.00076442	Late	CD4									FP236383.3	0.363964	2.0546e-19	7.5203e-15	LP	CD4.NaiveLike
ALOX5AP	0.804831	1.7815e-14	6.5207e-10	LP	CD8.EMRA.2										COX7A2	0.506439	2.1865e-08	0.00080029	Late	CD4									CCR7	0.930014	5.0981e-17	1.866e-12	LP	CD4.NaiveLike
PNRC1	-0.325284	2.0523e-14	7.5119e-10	LP	CD8.EMRA.2										BHLHE40	0.82859	2.55e-08	0.00093334	Late	CD4									ITGB1	-0.323568	1.891e-16	6.9216e-12	LP	CD4.NaiveLike
SAMD9L	0.911853	2.279e-14	8.3415e-10	LP	CD8.EMRA.2										CTSD	0.91587	2.6662e-08	0.0009759	Late	CD4									CRIP1	-0.423409	4.996e-16	1.8287e-11	LP	CD4.NaiveLike
KLRD1	0.429736	2.9255e-14	1.0708e-09	LP	CD8.EMRA.2										WIPF1	0.71033	2.8929e-08	0.00105887	Late	CD4									ANXA2	-0.422749	4.1392e-15	1.515e-10	LP	CD4.NaiveLike
TIGIT	0.730051	6.3169e-14	2.3121e-09	LP	CD8.EMRA.2										ZBP1	1.08405	4.0247e-08	0.00147312	Late	CD4									ALOX5AP	-0.353395	6.6251e-15	2.4249e-10	LP	CD4.NaiveLike
EIF1	-0.338769	7.8853e-14	2.8862e-09	LP	CD8.EMRA.2										RPL29	-0.340963	4.3573e-08	0.00159485	Late	CD4									DUSP2	-0.564325	1.6775e-14	6.14e-10	LP	CD4.NaiveLike
GZMA	0.40248	1.2012e-13	4.3967e-09	LP	CD8.EMRA.2										BTG3	1.08825	4.8273e-08	0.00176687	Late	CD4									FCMR	0.474225	7.0487e-13	2.58e-08	LP	CD4.NaiveLike
DYNLL1	0.937283	2.1287e-13	7.7914e-09	LP	CD8.EMRA.2										HLA-F	0.55658	5.0094e-08	0.00183355	Late	CD4									CYTOR	-0.586954	1.1336e-12	4.149e-08	LP	CD4.NaiveLike
HLA-DRA	-0.773919	4.9556e-13	1.8138e-08	LP	CD8.EMRA.2										TMEM258	0.598206	5.1384e-08	0.00188074	Late	CD4									HLA-DRB1	-0.415604	1.3702e-12	5.0154e-08	LP	CD4.NaiveLike
PIK3R1	-0.520773	1.8138e-12	6.639e-08	LP	CD8.EMRA.2										COPE	0.608738	5.3507e-08	0.00195846	Late	CD4									CXCR4	-0.497389	3.1281e-12	1.1449e-07	LP	CD4.NaiveLike
LINC01578	-0.449569	3.3281e-12	1.2181e-07	LP	CD8.EMRA.2										MDFIC	-0.978514	6.3502e-08	0.00232431	Late	CD4									TXK	0.606702	3.864e-12	1.4143e-07	LP	CD4.NaiveLike
SP100	0.329015	1.1424e-11	4.1812e-07	LP	CD8.EMRA.2										CBLB	0.84907	6.5672e-08	0.00240373	Late	CD4									C4orf48	-0.366999	4.9763e-12	1.8214e-07	LP	CD4.NaiveLike
GIMAP7	0.703727	1.2167e-11	4.4533e-07	LP	CD8.EMRA.2										RPS23	-0.347784	6.5696e-08	0.0024046	Late	CD4									LGALS3	-0.606467	1.3891e-11	5.0846e-07	LP	CD4.NaiveLike
HLA-DRB5	-0.407355	1.2788e-11	4.6807e-07	LP	CD8.EMRA.2										PCED1B	-0.939285	6.6175e-08	0.00242215	Late	CD4									PRDM1	-0.443253	1.8126e-11	6.6343e-07	LP	CD4.NaiveLike
TNFAIP3	-0.610867	1.285e-11	4.7035e-07	LP	CD8.EMRA.2										FOXP1	-0.809943	6.6813e-08	0.00244547	Late	CD4									SELL	0.427938	2.1792e-11	7.9764e-07	LP	CD4.NaiveLike
RBM3	-0.431226	1.7234e-11	6.3079e-07	LP	CD8.EMRA.2										LSP1	0.419794	7.0536e-08	0.00258176	Late	CD4									DUSP1	-0.377441	2.3267e-11	8.5162e-07	LP	CD4.NaiveLike
ABRACL	0.737944	1.7569e-11	6.4307e-07	LP	CD8.EMRA.2										TESPA1	-1.11973	7.2245e-08	0.00264431	Late	CD4									SELENOW	-0.365211	3.8124e-11	1.3954e-06	LP	CD4.NaiveLike
HLA-DQA1	-0.862544	2.5014e-11	9.1558e-07	LP	CD8.EMRA.2										PMAIP1	1.59068	7.4288e-08	0.0027191	Late	CD4									KLRB1	-0.425705	7.1109e-11	2.6027e-06	LP	CD4.NaiveLike
OAS2	0.867346	4.3582e-11	1.5952e-06	LP	CD8.EMRA.2										HLA-DMA	1.43291	7.6787e-08	0.00281057	Late	CD4									DUSP5	-0.427486	2.0366e-10	7.4544e-06	LP	CD4.NaiveLike
LAIR2	0.721505	5.2654e-11	1.9272e-06	LP	CD8.EMRA.2										ARL6IP1	0.729966	8.6683e-08	0.00317278	Late	CD4									JPT1	-0.365237	2.3028e-10	8.4287e-06	LP	CD4.NaiveLike
SNHG5	-0.486079	7.882e-11	2.885e-06	LP	CD8.EMRA.2										NDUFC2	0.624044	1.1166e-07	0.00408688	Late	CD4									DHRS7	-0.361613	5.836e-10	2.1361e-05	LP	CD4.NaiveLike
IFI16	0.552195	2.3972e-10	8.7742e-06	LP	CD8.EMRA.2										FP236383.3	-0.627075	1.1847e-07	0.0043363	Late	CD4									FHIT	0.44695	2.4665e-09	9.0279e-05	LP	CD4.NaiveLike
RAC2	0.366785	2.9022e-10	1.0622e-05	LP	CD8.EMRA.2										DNAJB6	0.715162	1.1896e-07	0.00435422	Late	CD4									DDIT4	-0.370849	6.6797e-09	0.00024449	LP	CD4.NaiveLike
FCRL6	0.346822	5.36e-10	1.9619e-05	LP	CD8.EMRA.2										RPS16	-0.349699	1.3237e-07	0.00484497	Late	CD4									CTSC	-0.336035	2.8414e-08	0.00104002	LP	CD4.NaiveLike
PARP9	0.695429	6.6667e-10	2.4402e-05	LP	CD8.EMRA.2										FLNA	0.523065	1.4219e-07	0.00520462	Late	CD4									DENND2D	0.500092	6.0698e-08	0.00222168	LP	CD4.NaiveLike
FCGR3A	0.334346	2.0193e-09	7.3909e-05	LP	CD8.EMRA.2										YWHAB	0.480188	1.6612e-07	0.00608022	Late	CD4									FAM13A	0.499156	9.4161e-08	0.00344648	LP	CD4.NaiveLike
NOP10	0.70353	2.1387e-09	7.8282e-05	LP	CD8.EMRA.2										CNN2	0.642679	1.7638e-07	0.0064559	Late	CD4									PIM1	0.361137	1.2377e-07	0.00453041	LP	CD4.NaiveLike
VSIR	0.358792	3.8213e-09	0.00013987	LP	CD8.EMRA.2										HLA-DQB1	0.714849	1.8974e-07	0.00694478	Late	CD4									PPP1R15A	-0.685671	1.2941e-07	0.00473661	LP	CD4.NaiveLike
CXCR4	-0.424839	3.9758e-09	0.00014552	LP	CD8.EMRA.2										CRYBG1	-1.27951	1.92e-07	0.00702764	Late	CD4									TRABD2A	0.355988	1.7146e-07	0.00627582	LP	CD4.NaiveLike
LYZ	0.613845	6.7544e-09	0.00024723	LP	CD8.EMRA.2										PIK3R1	0.469481	1.932e-07	0.00707141	Late	CD4									C12orf75	-0.390464	1.7184e-07	0.00628956	LP	CD4.NaiveLike
IRF9	0.342989	7.3024e-09	0.00026728	LP	CD8.EMRA.2										SAMHD1	-0.354402	1.9519e-07	0.00714439	Late	CD4									RNF19A	-0.332991	1.7549e-07	0.00642318	LP	CD4.NaiveLike
GIMAP4	0.662476	8.9018e-09	0.00032582	LP	CD8.EMRA.2										ODC1	1.00237	2.1877e-07	0.0080075	Late	CD4									CCDC167	-0.353366	2.2699e-07	0.00830839	LP	CD4.NaiveLike
CLIC1	0.386951	9.7373e-09	0.0003564	LP	CD8.EMRA.2										COX6A1	0.410763	2.2097e-07	0.00808783	Late	CD4									TENT5C	-0.468791	3.7051e-07	0.0135613	LP	CD4.NaiveLike
ATG2A	-0.88126	1.1201e-08	0.00040997	LP	CD8.EMRA.2										ALOX5AP	-0.378566	2.3982e-07	0.00877802	Late	CD4									SESN3	0.438067	4.3427e-07	0.015895	LP	CD4.NaiveLike
IL2RG	0.350229	1.2262e-08	0.0004488	LP	CD8.EMRA.2										HSPB1	-0.827381	2.4118e-07	0.00882774	Late	CD4									ARHGEF3	0.360654	5.6394e-07	0.0206412	LP	CD4.NaiveLike
EMP3	0.370783	1.5621e-08	0.00057175	LP	CD8.EMRA.2										IFI27L2	0.908924	2.8931e-07	0.0105895	Late	CD4									GZMM	-0.346078	6.629e-07	0.0242635	LP	CD4.NaiveLike
APOBEC3G	0.513015	1.7656e-08	0.00064623	LP	CD8.EMRA.2										TXNL4A	0.627111	3.1112e-07	0.0113874	Late	CD4									PIM2	0.397716	8.0566e-07	0.0294889	LP	CD4.NaiveLike
TRIM22	0.428168	2.6543e-08	0.00097152	LP	CD8.EMRA.2										ZEB2	0.786812	3.4726e-07	0.0127103	Late	CD4									BHLHE40	-0.430265	8.1314e-07	0.0297626	LP	CD4.NaiveLike
PYCARD	0.653912	3.5052e-08	0.00128296	LP	CD8.EMRA.2										DRAP1	0.614679	3.9665e-07	0.0145181	Late	CD4									MT2A	-0.362488	1.2409e-06	0.0454204	LP	CD4.NaiveLike
GIMAP5	0.759995	4.0354e-08	0.00147704	LP	CD8.EMRA.2										GRK5	1.43003	4.4622e-07	0.0163326	Late	CD4									RPS4Y1	-0.702677	3.4581e-74	1.2657e-69	LP	CD8.CM
CKLF	0.432783	4.6845e-08	0.00171462	LP	CD8.EMRA.2										HCST	0.418714	4.4651e-07	0.016343	Late	CD4									AC004448.2	-0.961391	5.9526e-61	2.1788e-56	LP	CD8.CM
DDX6	-0.33624	5.2071e-08	0.00190589	LP	CD8.EMRA.2										C16orf87	1.17249	4.6105e-07	0.0168752	Late	CD4									GZMB	-0.869411	8.8127e-28	3.2256e-23	LP	CD8.CM
PTGDR	0.390802	9.1106e-08	0.00333467	LP	CD8.EMRA.2										SEC61G	0.542544	4.8063e-07	0.0175921	Late	CD4									RPS26	-0.596456	5.8219e-23	2.1309e-18	LP	CD8.CM
GNG5	0.360035	1.0568e-07	0.00386808	LP	CD8.EMRA.2										AKR1B1	1.18302	4.8417e-07	0.0177217	Late	CD4									DDIT4	-0.457986	8.2145e-23	3.0067e-18	LP	CD8.CM
METRNL	-0.662557	1.3069e-07	0.00478364	LP	CD8.EMRA.2										SSR4	0.377003	4.9157e-07	0.0179923	Late	CD4									GNLY	-0.662801	4.886e-19	1.7884e-14	LP	CD8.CM
ABI3	0.493356	1.3251e-07	0.00485008	LP	CD8.EMRA.2										RNF166	0.722525	5.4284e-07	0.0198691	Late	CD4									MT-ATP8	0.548744	3.0156e-18	1.1038e-13	LP	CD8.CM
SAMHD1	0.556112	1.3409e-07	0.00490805	LP	CD8.EMRA.2										CAPNS1	0.591326	5.7293e-07	0.0209705	Late	CD4									MT-CO1	0.409981	1.8679e-16	6.8367e-12	LP	CD8.CM
SELPLG	0.390276	1.8141e-07	0.00663993	LP	CD8.EMRA.2										RPS11	-0.403931	5.7317e-07	0.0209793	Late	CD4									CXCR4	-0.457248	2.7637e-15	1.0116e-10	LP	CD8.CM
CBX4	-0.5764	1.9385e-07	0.00709537	LP	CD8.EMRA.2										PRELID1	0.625682	5.7595e-07	0.0210809	Late	CD4									MT-CO2	0.487079	1.4816e-14	5.4228e-10	LP	CD8.CM
TRG-AS1	0.32981	1.9936e-07	0.00729704	LP	CD8.EMRA.2										PTP4A2	0.583884	6.0446e-07	0.0221245	Late	CD4									MT-CO3	0.628535	5.8574e-14	2.1439e-09	LP	CD8.CM
RUNX3	-0.398239	2.5786e-07	0.00943805	LP	CD8.EMRA.2										JUNB	-0.856515	6.3017e-07	0.0230653	Late	CD4									FOS	-1.30032	7.8801e-14	2.8843e-09	LP	CD8.CM
BHLHE40	-0.583412	3.1463e-07	0.0115161	LP	CD8.EMRA.2										ITM2A	0.833172	6.3225e-07	0.0231417	Late	CD4									KLRD1	-0.664655	1.9018e-12	6.9608e-08	LP	CD8.CM
GLRX	0.62831	3.2366e-07	0.0118466	LP	CD8.EMRA.2										APOBEC3C	1.18874	6.4614e-07	0.02365	Late	CD4									CCL4	-0.8987	5.6597e-12	2.0716e-07	LP	CD8.CM
KIR3DL1	-0.55507	3.5841e-07	0.0131186	LP	CD8.EMRA.2										NOSIP	-0.51837	6.5562e-07	0.0239972	Late	CD4									TCF7	0.4626	5.8191e-12	2.1299e-07	LP	CD8.CM
CRIP1	0.387726	4.0105e-07	0.0146793	LP	CD8.EMRA.2										RIOK3	0.875714	6.8562e-07	0.0250952	Late	CD4									NOSIP	0.415817	8.4182e-12	3.0812e-07	LP	CD8.CM
CD160	-0.445768	4.6225e-07	0.0169194	LP	CD8.EMRA.2										NCALD	0.948848	7.1826e-07	0.0262898	Late	CD4									ITGB2-AS1	0.609176	1.7034e-11	6.2347e-07	LP	CD8.CM
NFKBIA	-0.518138	5.3932e-07	0.0197403	LP	CD8.EMRA.2										RPS25	-0.356412	7.2958e-07	0.0267042	Late	CD4									COTL1	0.396896	1.9021e-11	6.9619e-07	LP	CD8.CM
CCDC107	0.49672	6.4995e-07	0.0237895	LP	CD8.EMRA.2										SEC11C	0.798092	8.7797e-07	0.0321353	Late	CD4									MT-ND4L	0.369699	1.0353e-10	3.7893e-06	LP	CD8.CM
PDE4D	-0.526653	6.692e-07	0.0244939	LP	CD8.EMRA.2										SDHC	0.781339	1.0432e-06	0.0381829	Late	CD4									MT-ND5	0.464196	3.2977e-10	1.207e-05	LP	CD8.CM
NR4A2	-0.670054	7.5157e-07	0.0275091	LP	CD8.EMRA.2										RPS5	-0.44807	1.0978e-06	0.0401823	Late	CD4									MT-CYB	0.444907	6.5917e-10	2.4127e-05	LP	CD8.CM
TPST2	0.4506	7.6787e-07	0.0281055	LP	CD8.EMRA.2										AC079793.1	-1.17582	1.2117e-06	0.0443491	Late	CD4									MT-ND1	0.407586	1.3342e-09	4.8834e-05	LP	CD8.CM
CSTB	0.497056	9.0473e-07	0.0331147	LP	CD8.EMRA.2										RBMS1	-0.706695	1.2426e-06	0.0454809	Late	CD4									WWOX	0.42707	1.7418e-09	6.3753e-05	LP	CD8.CM
RASA2	-0.453092	9.86e-07	0.0360896	LP	CD8.EMRA.2										CYB561D2	1.06922	1.2801e-06	0.0468532	Late	CD4									ITM2A	-0.434761	6.1915e-09	0.00022662	LP	CD8.CM
CARD16	0.43919	9.9195e-07	0.0363075	LP	CD8.EMRA.2										ARPC2	0.398627	1.3285e-06	0.0486241	Late	CD4									NELL2	0.468538	1.4081e-08	0.00051538	LP	CD8.CM
RBM38	-0.543363	1.0301e-06	0.0377028	LP	CD8.EMRA.2										CAR-BCMA	13.0178	0	0	Late	CD8									PTPN6	0.557751	3.3371e-08	0.00122143	LP	CD8.CM
IFI35	0.381957	1.0316e-06	0.0377569	LP	CD8.EMRA.2										GNLY	1.70412	7.372e-213	2.698e-208	Late	CD8									CD27	0.479976	6.0338e-08	0.00220848	LP	CD8.CM
CCT3	0.525869	1.069e-06	0.0391261	LP	CD8.EMRA.2										GZMB	1.16838	2.693e-85	9.8568e-81	Late	CD8									GPR65	-0.418384	1.8538e-07	0.00678546	LP	CD8.CM
UBE2L6	0.390346	1.0859e-06	0.0397461	LP	CD8.EMRA.2										CD52	0.486823	1.995e-60	7.3022e-56	Late	CD8									LINC02446	-0.532908	2.6881e-07	0.00983881	LP	CD8.CM
HLA-DRB1	-0.334949	1.2666e-06	0.0463598	LP	CD8.EMRA.2										FGFBP2	0.970261	3.2804e-47	1.2007e-42	Late	CD8									PRF1	-0.42867	3.011e-07	0.0110208	LP	CD8.CM
KIR3DL2	-0.728949	1.3502e-06	0.0494191	LP	CD8.EMRA.2										IL7R	-1.66147	9.4482e-40	3.4582e-35	Late	CD8									MT-ATP6	0.441959	3.9921e-07	0.014612	LP	CD8.CM
AC004448.2	2.77248	5.9368e-41	2.173e-36	LP	CD8.NaiveLike										LAIR2	1.48788	1.7308e-33	6.3351e-29	Late	CD8									MAP3K8	-0.366317	7.5284e-07	0.0275554	LP	CD8.CM
RBFOX2	0.763042	8.8293e-37	3.2317e-32	LP	CD8.NaiveLike										PDE3B	0.890008	5.2157e-28	1.9091e-23	Late	CD8									DUSP1	-0.32682	7.61e-07	0.0278542	LP	CD8.CM
RPL38	0.36741	9.8271e-25	3.5969e-20	LP	CD8.NaiveLike										PDCD4	-0.854158	1.3537e-27	4.9549e-23	Late	CD8									AC004448.2	-1.1974	7.5828e-90	2.7755e-85	LP	CD8.EM
RPS29	0.363813	1.5098e-23	5.526e-19	LP	CD8.NaiveLike										CYTOR	0.789328	6.0221e-27	2.2042e-22	Late	CD8									GZMB	-0.738095	3.0335e-36	1.1103e-31	LP	CD8.EM
RPL37A	0.322412	3.7086e-20	1.3574e-15	LP	CD8.NaiveLike										FYB1	-0.58381	2.0586e-26	7.5348e-22	Late	CD8									GZMH	-0.331432	6.2925e-28	2.3032e-23	LP	CD8.EM
CD52	0.465339	2.8323e-18	1.0367e-13	LP	CD8.NaiveLike										RPS12	-0.358001	3.5755e-25	1.3087e-20	Late	CD8									DDIT4	-0.78877	2.2761e-25	8.331e-21	LP	CD8.EM
GATA3	0.633983	4.7744e-13	1.7475e-08	LP	CD8.NaiveLike										LGALS1	0.503169	4.2362e-25	1.5505e-20	Late	CD8									GNLY	-0.959235	1.6606e-20	6.078e-16	LP	CD8.EM
TSC22D3	-0.367577	1.3707e-11	5.0169e-07	LP	CD8.NaiveLike										NKG7	0.347283	2.6926e-24	9.8556e-20	Late	CD8									MAP3K8	-0.475085	2.2694e-20	8.3063e-16	LP	CD8.EM
ITGB1	0.436251	2.4592e-11	9.0012e-07	LP	CD8.NaiveLike										RPL39	-0.382569	4.12e-24	1.508e-19	Late	CD8									GIMAP5	0.757937	3.0801e-20	1.1274e-15	LP	CD8.EM
SNED1	1.08115	4.4657e-11	1.6345e-06	LP	CD8.NaiveLike										NPDC1	0.950322	6.3858e-24	2.3373e-19	Late	CD8									LINC00861	0.483871	1.6204e-19	5.931e-15	LP	CD8.EM
S100A4	0.435736	8.6374e-11	3.1615e-06	LP	CD8.NaiveLike										FLNA	0.445697	1.3113e-22	4.7994e-18	Late	CD8									GIMAP7	0.475615	4.7911e-18	1.7536e-13	LP	CD8.EM
ERN1	0.608297	1.3596e-10	4.9764e-06	LP	CD8.NaiveLike										TCF7	-1.06802	1.9139e-21	7.0052e-17	Late	CD8									CXCR3	0.912162	1.3046e-16	4.7751e-12	LP	CD8.EM
PRKCQ-AS1	-0.593552	1.5256e-10	5.5839e-06	LP	CD8.NaiveLike										RORA	-0.850909	8.883e-21	3.2513e-16	Late	CD8									KLF3	-0.346115	9.3642e-16	3.4275e-11	LP	CD8.EM
ARMH1	-0.667373	1.3587e-09	4.9732e-05	LP	CD8.NaiveLike										LINC01138	-0.983893	1.3573e-20	4.968e-16	Late	CD8									TRAF3IP3	0.427304	2.3634e-15	8.6505e-11	LP	CD8.EM
HIVEP3	0.929799	2.6017e-09	9.5228e-05	LP	CD8.NaiveLike										CX3CR1	0.888036	2.2139e-20	8.1035e-16	Late	CD8									LTB	0.526722	7.0915e-15	2.5956e-10	LP	CD8.EM
CD8B	-0.349821	5.0386e-09	0.00018442	LP	CD8.NaiveLike										MIR4435-2HG	0.729893	2.9732e-20	1.0883e-15	Late	CD8									TNFAIP3	-0.325347	3.1879e-14	1.1668e-09	LP	CD8.EM
ITM2A	-0.764337	4.0189e-08	0.00147101	LP	CD8.NaiveLike										CD27	0.729924	4.7716e-20	1.7465e-15	Late	CD8									CEMIP2	-0.505497	4.2678e-14	1.5621e-09	LP	CD8.EM
SEC61G	0.328599	2.0632e-07	0.00755171	LP	CD8.NaiveLike										ITGB2	0.378953	4.3101e-19	1.5776e-14	Late	CD8									TC2N	0.402288	1.8765e-13	6.8682e-09	LP	CD8.EM
CD63	0.608828	2.5798e-07	0.00944241	LP	CD8.NaiveLike										CMC1	-0.816458	8.8399e-19	3.2356e-14	Late	CD8									RPS4Y1	-0.505402	2.0078e-13	7.3491e-09	LP	CD8.EM
NELL2	-0.383338	2.7128e-07	0.00992947	LP	CD8.NaiveLike										P2RY8	0.523174	1.7009e-18	6.2255e-14	Late	CD8									HLA-DQA1	0.325793	2.0685e-13	7.5712e-09	LP	CD8.EM
PLAC8	-0.783938	4.1115e-07	0.0150491	LP	CD8.NaiveLike										COTL1	-0.670497	3.9033e-18	1.4287e-13	Late	CD8									HERPUD1	-0.460616	2.1156e-13	7.7435e-09	LP	CD8.EM
ABCC1	0.587183	4.4948e-07	0.0164519	LP	CD8.NaiveLike										PPP6R2	0.889292	9.7682e-18	3.5754e-13	Late	CD8									JUN	0.476161	7.9611e-12	2.9139e-07	LP	CD8.EM
SUSD4	0.850698	1.035e-06	0.0378826	LP	CD8.NaiveLike										PRF1	0.55776	1.0632e-17	3.8915e-13	Late	CD8									CD27	0.658693	1.0419e-11	3.8137e-07	LP	CD8.EM
MGST3	0.664254	1.1073e-06	0.04053	LP	CD8.NaiveLike										PPP2R2B	-1.28367	5.8028e-17	2.1239e-12	Late	CD8									GIMAP4	0.528351	1.2562e-11	4.598e-07	LP	CD8.EM
GBP5	-0.671334	1.2823e-06	0.046935	LP	CD8.NaiveLike										SCML4	-1.04038	6.2258e-17	2.2788e-12	Late	CD8									FKBP11	-0.385819	1.5674e-11	5.7371e-07	LP	CD8.EM
HLA-DRB5	-2.05473	1.0977e-50	4.0178e-46	LP	CD8.TEX										NFKBIA	0.532162	1.9707e-16	7.2133e-12	Late	CD8									FCMR	0.609029	1.6469e-11	6.0279e-07	LP	CD8.EM
GIMAP7	1.06656	1.072e-28	3.9238e-24	LP	CD8.TEX										PDE4D	0.688555	6.5918e-16	2.4127e-11	Late	CD8									GZMK	0.403325	2.2485e-11	8.2299e-07	LP	CD8.EM
RPS26	-1.0358	1.5492e-21	5.6704e-17	LP	CD8.TEX										GZMA	0.36112	2.9707e-15	1.0873e-10	Late	CD8									S1PR5	-0.553074	3.2155e-10	1.1769e-05	LP	CD8.EM
GIMAP4	0.906457	6.8724e-19	2.5154e-14	LP	CD8.TEX										PITPNC1	-0.675968	3.3513e-15	1.2266e-10	Late	CD8									SLFN5	0.465689	3.9454e-10	1.4441e-05	LP	CD8.EM
HLA-DQA1	-1.44528	2.9638e-18	1.0848e-13	LP	CD8.TEX										ASCL2	0.81702	3.8134e-15	1.3958e-10	Late	CD8									ISCA1	-0.350747	2.1868e-09	8.004e-05	LP	CD8.EM
ZFP36	-0.715477	1.5478e-15	5.6653e-11	LP	CD8.TEX										AOAH	-0.653125	1.1465e-14	4.1963e-10	Late	CD8									PDE4D	-0.514851	2.656e-09	9.7214e-05	LP	CD8.EM
GIMAP1	1.32384	2.8854e-14	1.0561e-09	LP	CD8.TEX										PXN	0.607624	1.9395e-14	7.099e-10	Late	CD8									TCF7	0.519739	4.634e-09	0.00016961	LP	CD8.EM
CEBPD	1.56032	1.525e-13	5.5819e-09	LP	CD8.TEX										MYBL1	-0.850904	2.3255e-14	8.5117e-10	Late	CD8									DENND2D	0.602339	1.2895e-08	0.00047197	LP	CD8.EM
DUSP2	-0.462123	8.1822e-13	2.9948e-08	LP	CD8.TEX										PELI1	0.731621	1.0913e-13	3.9944e-09	Late	CD8									GIMAP1	0.575649	1.506e-08	0.00055124	LP	CD8.EM
RAC2	0.39343	8.9193e-13	3.2646e-08	LP	CD8.TEX										FCGR3A	0.801848	5.7847e-13	2.1173e-08	Late	CD8									ERN1	-0.439404	1.9251e-08	0.00070464	LP	CD8.EM
RIPOR2	0.471078	1.2208e-12	4.4684e-08	LP	CD8.TEX										NSMF	0.890964	6.81e-13	2.4926e-08	Late	CD8									HLA-DRB5	0.323906	2.5984e-08	0.00095106	LP	CD8.EM
ISG15	0.882035	1.2839e-12	4.6991e-08	LP	CD8.TEX										IL10RA	0.462683	7.3673e-13	2.6966e-08	Late	CD8									SYAP1	-0.499675	1.1314e-07	0.00414119	LP	CD8.EM
GIMAP5	0.719739	6.3678e-12	2.3307e-07	LP	CD8.TEX										SAMSN1	0.71555	2.137e-12	7.8218e-08	Late	CD8									SCML4	0.527645	2.1521e-07	0.00787697	LP	CD8.EM
ISG20	0.578189	8.5924e-12	3.145e-07	LP	CD8.TEX										PIM1	-0.835742	3.3482e-12	1.2255e-07	Late	CD8									CEBPB	-0.405111	4.1006e-07	0.0150089	LP	CD8.EM
DDIT4	-0.957924	2.4159e-11	8.8428e-07	LP	CD8.TEX										TNFAIP8	-0.693424	3.6686e-12	1.3428e-07	Late	CD8									COTL1	0.385477	4.9998e-07	0.0183001	LP	CD8.EM
SNHG5	-0.602558	2.4182e-11	8.8512e-07	LP	CD8.TEX										BCL2	-0.906543	7.1833e-12	2.6292e-07	Late	CD8									SLAMF6	0.448978	5.7801e-07	0.0211564	LP	CD8.EM
RPL3	-0.355783	2.5993e-11	9.5141e-07	LP	CD8.TEX										MBP	-0.546328	8.3342e-12	3.0505e-07	Late	CD8									PRDM1	-0.45292	1.1091e-06	0.040594	LP	CD8.EM
HNRNPF	0.606664	4.2368e-11	1.5507e-06	LP	CD8.TEX										ATG2A	0.716445	1.205e-11	4.4106e-07	Late	CD8									AC004448.2	-0.661683	6.7262e-66	2.4619e-61	LP	CD8.EMRA.1
CLIC3	0.698153	8.1722e-11	2.9912e-06	LP	CD8.TEX										PTPRJ	0.512113	1.4984e-11	5.4845e-07	Late	CD8									DUSP2	-0.43589	3.191e-50	1.168e-45	LP	CD8.EMRA.1
CXCR4	-0.966705	9.3496e-11	3.4221e-06	LP	CD8.TEX										ADGRG1	0.654566	2.2109e-11	8.0923e-07	Late	CD8									CXCR4	-0.561562	1.648e-37	6.0319e-33	LP	CD8.EMRA.1
CX3CR1	1.16977	2.468e-10	9.0334e-06	LP	CD8.TEX										PIM3	0.639861	2.793e-11	1.0223e-06	Late	CD8									DDIT4	-0.5698	3.7203e-37	1.3617e-32	LP	CD8.EMRA.1
C14orf119	1.22088	1.5407e-09	5.6391e-05	LP	CD8.TEX										GZMK	-0.456206	5.1766e-11	1.8948e-06	Late	CD8									FP236383.3	0.349442	1.8808e-31	6.8843e-27	LP	CD8.EMRA.1
SAMHD1	0.543079	1.5564e-09	5.6967e-05	LP	CD8.TEX										LITAF	0.329822	5.2341e-11	1.9158e-06	Late	CD8									PIK3R1	-0.386424	3.223e-23	1.1797e-18	LP	CD8.EMRA.1
HLA-DPA1	-0.561994	4.3343e-09	0.00015864	LP	CD8.TEX										TSC22D3	-0.437533	6.0896e-11	2.2289e-06	Late	CD8									TNFAIP3	-0.332553	1.9191e-22	7.0243e-18	LP	CD8.EMRA.1
MX1	1.56542	8.792e-09	0.0003218	LP	CD8.TEX										FKBP5	-0.66517	1.7805e-10	6.5171e-06	Late	CD8									MT-CO1	0.341247	1.693e-21	6.1969e-17	LP	CD8.EMRA.1
RBM38	-0.59036	1.1044e-08	0.00040424	LP	CD8.TEX										HOPX	-0.465346	2.2587e-10	8.2672e-06	Late	CD8									MT-ATP8	0.409893	7.7718e-21	2.8446e-16	LP	CD8.EMRA.1
HLA-DQB1	-0.756838	1.4578e-08	0.00053357	LP	CD8.TEX										KLRD1	-0.488441	2.3049e-10	8.4363e-06	Late	CD8									HERPUD1	-0.342228	3.1866e-20	1.1664e-15	LP	CD8.EMRA.1
IRF7	0.894553	3.7741e-08	0.00138139	LP	CD8.TEX										TTC39C	-0.773515	3.87e-10	1.4165e-05	Late	CD8									TC2N	0.337179	4.8392e-20	1.7712e-15	LP	CD8.EMRA.1
SLFN5	0.655258	4.7083e-08	0.00172332	LP	CD8.TEX										TGFBR3	0.487904	4.3492e-10	1.5919e-05	Late	CD8									MAP3K8	-0.441916	6.0456e-20	2.2128e-15	LP	CD8.EMRA.1
CD74	-0.516496	8.2273e-08	0.00301135	LP	CD8.TEX										MAML2	-0.791669	4.5623e-10	1.6699e-05	Late	CD8									CEBPB	-0.438188	3.0371e-17	1.1117e-12	LP	CD8.EMRA.1
APBB1IP	0.467767	9.0252e-08	0.00330339	LP	CD8.TEX										ANXA5	0.535878	4.7038e-10	1.7217e-05	Late	CD8									MT-CO3	0.406948	6.605e-17	2.4176e-12	LP	CD8.EMRA.1
MAP3K8	-1.32833	1.2411e-07	0.00454254	LP	CD8.TEX										ALOX5AP	-0.680781	5.7145e-10	2.0916e-05	Late	CD8									AC004687.1	0.4984	2.114e-16	7.7377e-12	LP	CD8.EMRA.1
RUNX3	-0.426017	1.2463e-07	0.00456183	LP	CD8.TEX										SSBP4	0.351359	5.8853e-10	2.1541e-05	Late	CD8									S1PR1	0.465299	4.5966e-16	1.6824e-11	LP	CD8.EMRA.1
HLA-DRA	-0.723893	1.4747e-07	0.00539752	LP	CD8.TEX										BHLHE40	0.515742	6.6614e-10	2.4382e-05	Late	CD8									CEMIP2	-0.377046	6.1263e-16	2.2423e-11	LP	CD8.EMRA.1
GIMAP6	1.19398	2.2185e-07	0.00812024	LP	CD8.TEX										LYST	0.649138	7.7657e-10	2.8424e-05	Late	CD8									PDE4D	-0.408793	1.193e-12	4.3666e-08	LP	CD8.EMRA.1
DYNLL1	0.664686	3.9471e-07	0.014447	LP	CD8.TEX										NFAT5	0.656855	8.0929e-10	2.9622e-05	Late	CD8									SLFN5	0.396539	1.2076e-12	4.4202e-08	LP	CD8.EMRA.1
ZFP36L2	-0.533816	5.97e-07	0.0218515	LP	CD8.TEX										DDIT4	-0.527896	1.0498e-09	3.8423e-05	Late	CD8									PIM1	0.573176	1.9953e-12	7.3033e-08	LP	CD8.EMRA.1
PIM1	0.692147	1.0445e-06	0.0382319	LP	CD8.TEX										SAT1	0.430406	1.0611e-09	3.8837e-05	Late	CD8									MT-ND5	0.357559	3.3801e-12	1.2372e-07	LP	CD8.EMRA.1
SIT1	0.846635	1.0857e-06	0.0397381	LP	CD8.TEX										PRDM1	0.487107	1.1718e-09	4.2888e-05	Late	CD8									DUSP1	-0.383123	9.7113e-12	3.5545e-07	LP	CD8.EMRA.1
APOBEC3G	0.450628	1.1733e-06	0.0429439	LP	CD8.TEX										MBNL1	-0.35531	1.7249e-09	6.3133e-05	Late	CD8									ENC1	-0.425672	1.7416e-11	6.3747e-07	LP	CD8.EMRA.1
RPS4Y1	-1.22871	1.5344e-48	5.6164e-44	Late	CD4.CTL.EOMES										LAT	0.368294	3.1458e-09	0.00011514	Late	CD8									SYTL3	-0.344157	6.5167e-11	2.3852e-06	LP	CD8.EMRA.1
CAR-BCMA	-3.36742	1.7327e-28	6.3419e-24	Late	CD4.CTL.EOMES										HERPUD1	0.393702	4.3691e-09	0.00015992	Late	CD8									SNHG5	0.415939	1.3157e-10	4.8157e-06	LP	CD8.EMRA.1
GNLY	-1.15152	1.0806e-15	3.955e-11	Late	CD4.CTL.EOMES										C12orf75	0.372635	5.6124e-09	0.00020543	Late	CD8									ZNF683	0.766827	1.8344e-10	6.7144e-06	LP	CD8.EMRA.1
TCF7	1.1138	1.0144e-13	3.7129e-09	Late	CD4.CTL.EOMES										GYG1	-0.744435	7.2225e-09	0.00026436	Late	CD8									TMC8	0.435112	2.1853e-10	7.9988e-06	LP	CD8.EMRA.1
IFITM1	0.324023	4.6039e-13	1.6851e-08	Late	CD4.CTL.EOMES										VPS37B	0.519079	8.2591e-09	0.0003023	Late	CD8									FOSL2	-0.333789	2.9742e-10	1.0886e-05	LP	CD8.EMRA.1
FCRL6	1.06233	6.9743e-13	2.5527e-08	Late	CD4.CTL.EOMES										RHOC	-0.545609	8.4413e-09	0.00030897	Late	CD8									RAP1GAP2	0.365194	7.718e-10	2.8249e-05	LP	CD8.EMRA.1
FLT3LG	0.630817	2.1729e-12	7.9532e-08	Late	CD4.CTL.EOMES										DOK2	0.434919	1.4058e-08	0.00051455	Late	CD8									ITM2A	-0.332295	1.9433e-09	7.1128e-05	LP	CD8.EMRA.1
KLF3	0.692987	6.5703e-11	2.4049e-06	Late	CD4.CTL.EOMES										RELB	0.715212	2.7659e-08	0.00101237	Late	CD8									CCL4	-0.50848	2.4105e-09	8.8229e-05	LP	CD8.EMRA.1
PIM1	0.544454	5.3933e-10	1.974e-05	Late	CD4.CTL.EOMES										ZBTB20	-0.614173	3.1665e-08	0.001159	Late	CD8									MT-ND3	0.444639	4.328e-09	0.00015841	LP	CD8.EMRA.1
CD40LG	0.792034	6.6274e-09	0.00024258	Late	CD4.CTL.EOMES										CD96	-0.395252	4.2526e-08	0.00155653	Late	CD8									CD55	-0.338334	5.9982e-09	0.00021955	LP	CD8.EMRA.1
ITGB1	0.688237	8.1359e-09	0.00029779	Late	CD4.CTL.EOMES										KLF3	-0.4079	5.475e-08	0.00200397	Late	CD8									GPR65	-0.386167	7.4653e-08	0.00273244	LP	CD8.EMRA.1
ANXA1	0.374045	9.9796e-09	0.00036527	Late	CD4.CTL.EOMES										DUSP1	-0.540113	8.062e-08	0.00295085	Late	CD8									SCML4	0.400397	9.7836e-08	0.00358099	LP	CD8.EMRA.1
IL7R	0.61002	3.6094e-08	0.00132112	Late	CD4.CTL.EOMES										GIMAP5	-0.545654	8.3271e-08	0.00304789	Late	CD8									SYAP1	-0.370019	1.9526e-07	0.0071469	LP	CD8.EMRA.1
GIMAP5	0.388999	8.1648e-08	0.00298849	Late	CD4.CTL.EOMES										CTSC	0.381551	8.4312e-08	0.003086	Late	CD8									PTGDR	0.337732	2.5504e-07	0.00933485	LP	CD8.EMRA.1
CBLB	-0.42804	1.1934e-07	0.00436823	Late	CD4.CTL.EOMES										BST2	-0.416677	9.3631e-08	0.00342709	Late	CD8									INPP4B	0.324565	3.716e-07	0.0136013	LP	CD8.EMRA.1
STAT1	0.567851	1.7006e-07	0.00622436	Late	CD4.CTL.EOMES										CXCR4	-0.488401	1.2296e-07	0.00450046	Late	CD8									AC004448.2	-0.672649	2.181e-49	7.9827e-45	LP	CD8.EMRA.2
PAM	-0.652641	3.0019e-07	0.0109874	Late	CD4.CTL.EOMES										ABLIM1	-0.504502	1.4173e-07	0.00518775	Late	CD8									TYROBP	0.448623	3.4247e-39	1.2535e-34	LP	CD8.EMRA.2
MCTP2	-0.76542	3.351e-07	0.0122653	Late	CD4.CTL.EOMES										PTPN6	-0.421157	1.4709e-07	0.00538386	Late	CD8									KLRC2	0.62535	2.0452e-33	7.4858e-29	LP	CD8.EMRA.2
TNIK	0.596316	3.5466e-07	0.0129812	Late	CD4.CTL.EOMES										PHACTR2	-0.550647	1.809e-07	0.0066212	Late	CD8									TRDV1	-1.09369	1.8704e-31	6.8462e-27	LP	CD8.EMRA.2
RPL36A	0.369922	4.224e-07	0.0154606	Late	CD4.CTL.EOMES										MT1E	0.56474	1.9269e-07	0.00705283	Late	CD8									DUSP2	-0.457401	2.8975e-29	1.0606e-24	LP	CD8.EMRA.2
KLF10	-1.19907	6.1342e-07	0.0224524	Late	CD4.CTL.EOMES										PLCL2	-0.601211	2.9505e-07	0.0107993	Late	CD8									CD8B	0.485987	7.4334e-27	2.7208e-22	LP	CD8.EMRA.2
AC004687.1	-0.567594	8.5809e-07	0.0314077	Late	CD4.CTL.EOMES										DUSP5	0.657909	3.0085e-07	0.0110115	Late	CD8									MT-ATP8	0.457657	3.2755e-21	1.1989e-16	LP	CD8.EMRA.2
PHACTR2	0.43271	1.1618e-06	0.0425259	Late	CD4.CTL.EOMES										CLDND1	0.344449	3.6237e-07	0.0132634	Late	CD8									GIMAP7	0.504194	7.8288e-21	2.8655e-16	LP	CD8.EMRA.2
HLA-B	0.373917	4.0456e-43	1.4808e-38	Late	CD4.CTL.GNLY										CTSD	0.403929	3.7723e-07	0.0138072	Late	CD8									KIR3DL2	-0.573079	7.8095e-20	2.8584e-15	LP	CD8.EMRA.2
RPS4Y1	-1.76797	5.4317e-42	1.9881e-37	Late	CD4.CTL.GNLY										GSPT1	0.498744	3.9831e-07	0.0145789	Late	CD8									HLA-DRA	-0.791926	1.8968e-18	6.9426e-14	LP	CD8.EMRA.2
AC004448.2	-2.95971	2.6272e-33	9.616e-29	Late	CD4.CTL.GNLY										ABRACL	-0.39829	4.325e-07	0.0158302	Late	CD8									MT-CO3	0.412974	3.0538e-18	1.1178e-13	LP	CD8.EMRA.2
GNLY	-1.39877	4.4743e-24	1.6377e-19	Late	CD4.CTL.GNLY										SELL	-0.602153	5.3166e-07	0.0194599	Late	CD8									DDIT4	-0.543352	5.7938e-18	2.1206e-13	LP	CD8.EMRA.2
RPS26	-0.373415	1.438e-23	5.2635e-19	Late	CD4.CTL.GNLY										ARHGAP26	-0.515476	5.4966e-07	0.0201186	Late	CD8									CXCR4	-0.482112	1.2591e-17	4.6084e-13	LP	CD8.EMRA.2
GIMAP7	0.538838	1.4391e-23	5.2673e-19	Late	CD4.CTL.GNLY										FLT3LG	-0.455409	8.0001e-07	0.029282	Late	CD8									MT-ND4L	0.322362	4.2127e-16	1.5419e-11	LP	CD8.EMRA.2
IL7R	1.08886	2.0819e-23	7.62e-19	Late	CD4.CTL.GNLY										JAK3	0.572566	1.0295e-06	0.0376831	Late	CD8									CD69	-0.500952	4.6029e-16	1.6848e-11	LP	CD8.EMRA.2
TRG-AS1	0.861379	1.0177e-16	3.7251e-12	Late	CD4.CTL.GNLY										TMEM123	-0.440167	1.0639e-06	0.0389406	Late	CD8									MT-CO2	0.338949	1.0838e-15	3.9669e-11	LP	CD8.EMRA.2
GIMAP4	0.598155	6.1989e-15	2.2689e-10	Late	CD4.CTL.GNLY										LINC00861	-0.413404	1.2273e-06	0.0449214	Late	CD8									HLA-DRB1	-0.44594	6.6973e-15	2.4513e-10	LP	CD8.EMRA.2
NFKBIA	-0.821133	2.2926e-14	8.3915e-10	Late	CD4.CTL.GNLY										CREM	0.55984	1.2526e-06	0.0458463	Late	CD8									MT-CYB	0.333154	2.3681e-13	8.6676e-09	LP	CD8.EMRA.2
LYZ	-1.05406	3.2504e-13	1.1897e-08	Late	CD4.CTL.GNLY										TMX4	0.447279	1.261e-06	0.0461543	Late	CD8									MAP3K8	-0.450209	3.8375e-13	1.4046e-08	LP	CD8.EMRA.2
KLRD1	1.75665	1.9626e-12	7.1834e-08	Late	CD4.CTL.GNLY										PRSS23	0.419831	1.366e-06	0.0499985	Late	CD8									KIR3DL1	-0.825688	5.0864e-12	1.8617e-07	LP	CD8.EMRA.2
GIMAP5	0.56509	3.5271e-12	1.291e-07	Late	CD4.CTL.GNLY																								DUSP1	-0.419447	7.067e-11	2.5867e-06	LP	CD8.EMRA.2
HLA-DRB5	-0.988316	1.0535e-11	3.8559e-07	Late	CD4.CTL.GNLY																								IFI6	-0.53837	7.375e-11	2.6994e-06	LP	CD8.EMRA.2
EIF1	-0.447201	2.2578e-11	8.2641e-07	Late	CD4.CTL.GNLY																								CEMIP2	-0.432524	1.0069e-10	3.6855e-06	LP	CD8.EMRA.2
TAGAP	0.550507	9.4137e-11	3.4456e-06	Late	CD4.CTL.GNLY																								TRAC	0.525083	2.9748e-10	1.0888e-05	LP	CD8.EMRA.2
CISH	1.20173	2.0295e-10	7.4285e-06	Late	CD4.CTL.GNLY																								CCL4	-1.19791	3.3979e-10	1.2437e-05	LP	CD8.EMRA.2
STAT1	0.631555	3.6716e-10	1.3439e-05	Late	CD4.CTL.GNLY																								MT-ND4	0.327469	5.9943e-10	2.194e-05	LP	CD8.EMRA.2
PIM3	-0.958576	1.3241e-09	4.8464e-05	Late	CD4.CTL.GNLY																								ISG15	-0.477649	9.3653e-10	3.4279e-05	LP	CD8.EMRA.2
HLA-DRA	-0.669281	2.5366e-09	9.2845e-05	Late	CD4.CTL.GNLY																								ZBTB38	0.334575	1.299e-09	4.7545e-05	LP	CD8.EMRA.2
COG3	-1.01071	7.7985e-09	0.00028544	Late	CD4.CTL.GNLY																								GIMAP1	0.583538	1.5963e-09	5.8429e-05	LP	CD8.EMRA.2
ATP8A1	-0.994057	1.0125e-08	0.00037061	Late	CD4.CTL.GNLY																								IRF7	-0.54372	1.9705e-09	7.2126e-05	LP	CD8.EMRA.2
ATG2A	-1.31569	1.5633e-08	0.00057219	Late	CD4.CTL.GNLY																								GIMAP5	0.523596	2.7803e-09	0.00010176	LP	CD8.EMRA.2
LINC01578	-0.514775	2.6723e-08	0.00097813	Late	CD4.CTL.GNLY																								MT-ATP6	0.353758	2.8976e-09	0.00010606	LP	CD8.EMRA.2
IFI16	0.551023	5.5118e-08	0.00201743	Late	CD4.CTL.GNLY																								SLFN5	0.430411	8.0004e-09	0.00029283	LP	CD8.EMRA.2
SBDS	-1.05964	8.365e-08	0.00306177	Late	CD4.CTL.GNLY																								XAF1	-0.449839	8.5925e-09	0.0003145	LP	CD8.EMRA.2
DNAJC15	-0.676354	1.3672e-07	0.00500426	Late	CD4.CTL.GNLY																								A2M	0.49142	9.4014e-09	0.00034411	LP	CD8.EMRA.2
CD74	-0.377238	1.5955e-07	0.00583998	Late	CD4.CTL.GNLY																								CX3CR1	0.501585	1.6607e-08	0.00060784	LP	CD8.EMRA.2
CD70	1.10419	2.6433e-07	0.00967483	Late	CD4.CTL.GNLY																								MFSD10	0.382351	3.6704e-08	0.00134344	LP	CD8.EMRA.2
ICAM2	0.843683	3.2018e-07	0.0117192	Late	CD4.CTL.GNLY																								RPS26	-0.500472	3.9616e-08	0.00145001	LP	CD8.EMRA.2
TNFAIP3	-0.41714	3.8154e-07	0.0139652	Late	CD4.CTL.GNLY																								AKT3	0.356446	7.6255e-08	0.00279108	LP	CD8.EMRA.2
AOAH	0.512948	4.3562e-07	0.0159445	Late	CD4.CTL.GNLY																								PRDM1	-0.331418	1.3826e-07	0.00506061	LP	CD8.EMRA.2
ZBTB1	-0.659292	5.7991e-07	0.0212259	Late	CD4.CTL.GNLY																								LINC02446	0.341813	2.555e-07	0.00935199	LP	CD8.EMRA.2
PIM1	0.62488	7.7681e-07	0.0284326	Late	CD4.CTL.GNLY																								SELL	-0.429906	2.862e-07	0.0104754	LP	CD8.EMRA.2
S100A8	-0.990396	7.8628e-07	0.0287795	Late	CD4.CTL.GNLY																								MT2A	0.353637	3.0481e-07	0.0111566	LP	CD8.EMRA.2
HIST1H1C	-0.666868	1.0652e-06	0.0389885	Late	CD4.CTL.GNLY																								MVD	-0.400159	3.2216e-07	0.0117916	LP	CD8.EMRA.2
EFHD2	-0.384613	1.0778e-06	0.0394483	Late	CD4.CTL.GNLY																								TRAF3IP3	0.344848	3.3713e-07	0.0123397	LP	CD8.EMRA.2
RUNX3	-0.489294	1.3638e-06	0.0499168	Late	CD4.CTL.GNLY																								HIST1H1D	-0.368202	3.9868e-07	0.0145924	LP	CD8.EMRA.2
HLA-B	0.365118	3.8229e-22	1.3993e-17	Late	CD4.NaiveLike																								BTG2	-0.356868	6.409e-07	0.0234581	LP	CD8.EMRA.2
GZMA	-0.60855	7.6565e-17	2.8024e-12	Late	CD4.NaiveLike																								GIMAP7	1.12465	9.9487e-31	3.6414e-26	LP	CD8.TEX
PPP1R15A	0.659677	3.9106e-15	1.4314e-10	Late	CD4.NaiveLike																								TMSB4X	0.592659	2.811e-24	1.0289e-19	LP	CD8.TEX
MX1	0.988739	1.0511e-10	3.8471e-06	Late	CD4.NaiveLike																								EIF1	-0.78689	4.0224e-23	1.4723e-18	LP	CD8.TEX
GZMK	-0.963387	1.1368e-09	4.161e-05	Late	CD4.NaiveLike																								UBC	-0.576872	1.9359e-21	7.0859e-17	LP	CD8.TEX
MAL	0.353645	4.5904e-09	0.00016802	Late	CD4.NaiveLike																								H3F3B	-0.565093	4.4131e-21	1.6153e-16	LP	CD8.TEX
MT2A	-0.361038	4.6705e-09	0.00017095	Late	CD4.NaiveLike																								GIMAP4	1.11444	1.9168e-20	7.016e-16	LP	CD8.TEX
TSHZ2	0.39413	7.2435e-08	0.00265127	Late	CD4.NaiveLike																								GIMAP5	1.08399	1.6194e-18	5.9273e-14	LP	CD8.TEX
RPS10-NUDT3	-0.421666	1.2703e-07	0.00464959	Late	CD4.NaiveLike																								GIMAP1	1.29037	1.1241e-17	4.1146e-13	LP	CD8.TEX
CD320	-0.393902	8.6031e-07	0.031489	Late	CD4.NaiveLike																								MYL12A	0.52796	3.3497e-17	1.2261e-12	LP	CD8.TEX
TRIB2	0.454546	1.2851e-06	0.0470361	Late	CD4.NaiveLike																								DUSP2	-1.09691	3.8284e-16	1.4013e-11	LP	CD8.TEX
MT-ATP8	-0.924612	3.2533e-28	1.1908e-23	Late	CD8.CM																								PIK3R1	-0.919471	4.1921e-16	1.5344e-11	LP	CD8.TEX
MT-ND3	-0.747399	5.7016e-26	2.0869e-21	Late	CD8.CM																								S100A11	0.823391	6.4594e-16	2.3643e-11	LP	CD8.TEX
FTH1	0.44944	1.4027e-24	5.1341e-20	Late	CD8.CM																								ODC1	-0.840488	7.6941e-16	2.8162e-11	LP	CD8.TEX
MT-ATP6	-0.69628	3.7277e-20	1.3644e-15	Late	CD8.CM																								CD2	0.619296	7.7356e-16	2.8314e-11	LP	CD8.TEX
MT-CO1	-0.682226	4.5165e-20	1.6531e-15	Late	CD8.CM																								LINC01578	-0.690861	1.3318e-15	4.8747e-11	LP	CD8.TEX
MT-ND4	-0.717646	7.7269e-19	2.8282e-14	Late	CD8.CM																								RUNX3	-0.713269	1.8559e-15	6.7929e-11	LP	CD8.TEX
FXYD2	1.56038	8.8437e-18	3.237e-13	Late	CD8.CM																								NFKBIA	-1.39044	3.5492e-15	1.2991e-10	LP	CD8.TEX
TXNIP	-0.399224	1.0867e-17	3.9777e-13	Late	CD8.CM																								SIT1	1.26634	8.1144e-15	2.97e-10	LP	CD8.TEX
MT-CO2	-0.570719	4.7847e-17	1.7513e-12	Late	CD8.CM																								GZMA	0.637666	1.4005e-14	5.126e-10	LP	CD8.TEX
MT-ND4L	-0.693042	6.2732e-17	2.2961e-12	Late	CD8.CM																								SLFN5	1.22059	2.8419e-14	1.0402e-09	LP	CD8.TEX
MT-CYB	-0.645088	2.0513e-16	7.5082e-12	Late	CD8.CM																								RIPOR2	0.834847	1.9522e-13	7.1454e-09	LP	CD8.TEX
RPS4Y1	0.407025	3.3661e-16	1.2321e-11	Late	CD8.CM																								IL32	0.495458	2.6095e-13	9.5513e-09	LP	CD8.TEX
EIF1	0.353404	2.421e-15	8.8615e-11	Late	CD8.CM																								CD69	-1.17852	2.7773e-13	1.0165e-08	LP	CD8.TEX
H3F3B	0.33693	1.9249e-14	7.0457e-10	Late	CD8.CM																								PIM3	-1.51622	3.2735e-13	1.1982e-08	LP	CD8.TEX
BTG1	0.356979	3.5023e-13	1.2819e-08	Late	CD8.CM																								PDE4D	-2.20287	7.8829e-13	2.8853e-08	LP	CD8.TEX
AC004448.2	-0.76727	1.444e-12	5.2853e-08	Late	CD8.CM																								EPC1	-1.0693	1.2056e-12	4.4126e-08	LP	CD8.TEX
MT-ND6	-0.794283	7.1203e-12	2.6062e-07	Late	CD8.CM																								PMAIP1	-2.10792	1.2792e-12	4.6823e-08	LP	CD8.TEX
PRKCB	-0.527464	7.2481e-12	2.6529e-07	Late	CD8.CM																								TRA2B	-0.712265	3.337e-12	1.2214e-07	LP	CD8.TEX
MT-ND5	-0.597425	1.3744e-11	5.0306e-07	Late	CD8.CM																								CX3CR1	0.990649	4.5749e-12	1.6745e-07	LP	CD8.TEX
PPP6R2	-0.750578	2.1341e-11	7.8113e-07	Late	CD8.CM																								TRAF3IP3	0.92612	4.8514e-12	1.7757e-07	LP	CD8.TEX
MT-ND1	-0.590192	2.307e-11	8.4441e-07	Late	CD8.CM																								CXCR3	1.17261	7.7802e-12	2.8477e-07	LP	CD8.TEX
PAM	-0.931652	2.3339e-11	8.5424e-07	Late	CD8.CM																								DDIT4	-0.895114	1.0176e-11	3.7244e-07	LP	CD8.TEX
SKAP1	-0.550116	4.5167e-11	1.6532e-06	Late	CD8.CM																								ALYREF	-0.515874	1.8616e-11	6.8138e-07	LP	CD8.TEX
GAS5	0.373437	1.6365e-10	5.9901e-06	Late	CD8.CM																								HERPUD1	-0.785883	2.5317e-11	9.2665e-07	LP	CD8.TEX
FLNA	-0.387751	3.5331e-10	1.2932e-05	Late	CD8.CM																								RBM38	-0.649425	3.0685e-11	1.1231e-06	LP	CD8.TEX
PIM3	0.702123	6.4727e-10	2.3692e-05	Late	CD8.CM																								SELL	1.72386	3.6225e-11	1.3259e-06	LP	CD8.TEX
NEAT1	-0.631077	8.4114e-10	3.0787e-05	Late	CD8.CM																								ZBTB1	-1.23745	4.1932e-11	1.5348e-06	LP	CD8.TEX
CELF2	-0.53098	1.0646e-09	3.8967e-05	Late	CD8.CM																								ISCA1	-1.43759	4.6502e-11	1.7021e-06	LP	CD8.TEX
FTX	-0.960274	1.3841e-09	5.0661e-05	Late	CD8.CM																								CLEC2B	-0.609547	4.6909e-11	1.717e-06	LP	CD8.TEX
CBLB	-0.394971	1.738e-09	6.3615e-05	Late	CD8.CM																								VPS37B	-0.926117	9.1553e-11	3.351e-06	LP	CD8.TEX
S100A8	0.374277	2.2783e-09	8.3389e-05	Late	CD8.CM																								HSPA5	-0.535959	9.9225e-11	3.6318e-06	LP	CD8.TEX
NSF	-0.724755	3.3711e-09	0.00012339	Late	CD8.CM																								PIM1	1.28862	1.163e-10	4.2569e-06	LP	CD8.TEX
EPB41	-0.41243	4.7664e-09	0.00017446	Late	CD8.CM																								ARL6IP5	0.576727	3.1042e-10	1.1362e-05	LP	CD8.TEX
DDX3Y	0.615105	9.2808e-09	0.0003397	Late	CD8.CM																								CTSC	0.563607	3.4141e-10	1.2496e-05	LP	CD8.TEX
S100A9	0.508013	1.0003e-08	0.00036613	Late	CD8.CM																								LBH	0.979717	3.9941e-10	1.4619e-05	LP	CD8.TEX
NR4A2	0.665789	1.34e-08	0.00049046	Late	CD8.CM																								RBM39	-0.876507	4.1914e-10	1.5341e-05	LP	CD8.TEX
MT-CO3	-0.466353	1.4924e-08	0.00054626	Late	CD8.CM																								SELPLG	0.910241	4.9476e-10	1.8109e-05	LP	CD8.TEX
JMY	0.77636	2.0021e-08	0.00073281	Late	CD8.CM																								SRGN	-0.378907	6.4768e-10	2.3706e-05	LP	CD8.TEX
PYHIN1	-0.661369	2.0373e-08	0.0007457	Late	CD8.CM																								RPL34	-0.351828	6.5723e-10	2.4056e-05	LP	CD8.TEX
IRF2BP2	0.54817	2.1221e-08	0.00077672	Late	CD8.CM																								TNFAIP8	1.03148	6.7695e-10	2.4778e-05	LP	CD8.TEX
PIP4K2A	-0.413521	2.4967e-08	0.00091383	Late	CD8.CM																								KLF3	-0.392121	8.1075e-10	2.9675e-05	LP	CD8.TEX
LINC01934	-0.803261	2.5597e-08	0.0009369	Late	CD8.CM																								BTG3	-1.17889	1.0469e-09	3.8319e-05	LP	CD8.TEX
ARHGAP15	-0.477479	2.9423e-08	0.00107696	Late	CD8.CM																								THEMIS	0.860092	1.2365e-09	4.526e-05	LP	CD8.TEX
RNF213	-0.416768	3.2329e-08	0.00118332	Late	CD8.CM																								CHST12	0.953207	1.2594e-09	4.6098e-05	LP	CD8.TEX
PDE4D	0.666519	3.5869e-08	0.00131288	Late	CD8.CM																								HIST1H4C	-0.689747	1.7641e-09	6.4569e-05	LP	CD8.TEX
PRKCH	-0.389328	4.8622e-08	0.00177965	Late	CD8.CM																								PRF1	0.718666	1.8628e-09	6.8182e-05	LP	CD8.TEX
ATXN1	-0.506221	5.0899e-08	0.001863	Late	CD8.CM																								GIMAP6	1.5702	2.1897e-09	8.0147e-05	LP	CD8.TEX
MT-ND2	-0.515298	7.6753e-08	0.00280933	Late	CD8.CM																								LTB	0.71126	2.7796e-09	0.00010174	LP	CD8.TEX
TRERF1	-0.848705	1.2554e-07	0.00459516	Late	CD8.CM																								TENT5C	-1.03937	3.1617e-09	0.00011572	LP	CD8.TEX
MBNL1	-0.360753	1.613e-07	0.00590375	Late	CD8.CM																								HIST1H1D	-0.440879	3.179e-09	0.00011636	LP	CD8.TEX
KLF12	-0.535667	1.6602e-07	0.00607668	Late	CD8.CM																								HIST1H1C	-0.540514	3.2017e-09	0.00011719	LP	CD8.TEX
GZMK	0.378943	2.0381e-07	0.00745977	Late	CD8.CM																								S1PR4	0.901698	3.8659e-09	0.0001415	LP	CD8.TEX
NFKB1	0.54196	2.7975e-07	0.0102393	Late	CD8.CM																								TNFAIP3	-0.935415	4.2107e-09	0.00015412	LP	CD8.TEX
ANKRD44	-0.41235	3.0321e-07	0.0110982	Late	CD8.CM																								DAZAP1	-0.357888	5.131e-09	0.0001878	LP	CD8.TEX
MT2A	0.742464	3.3795e-07	0.0123695	Late	CD8.CM																								TSPYL2	-2.07478	6.9316e-09	0.00025371	LP	CD8.TEX
ATRX	-0.491926	3.5171e-07	0.0128731	Late	CD8.CM																								ACTR3	0.818335	7.123e-09	0.00026072	LP	CD8.TEX
DDX17	-0.515941	3.838e-07	0.014048	Late	CD8.CM																								RAB5IF	-0.684462	7.8998e-09	0.00028915	LP	CD8.TEX
RIPOR2	-0.412082	4.0402e-07	0.0147879	Late	CD8.CM																								LCP2	0.814276	8.9446e-09	0.00032739	LP	CD8.TEX
TSPYL2	0.753939	5.5584e-07	0.0203449	Late	CD8.CM																								ZEB2	-0.49231	1.6964e-08	0.0006209	LP	CD8.TEX
FOXN3	-0.389979	6.7092e-07	0.0245569	Late	CD8.CM																								CSRNP1	-2.2939	1.8161e-08	0.00066474	LP	CD8.TEX
THEMIS	-0.685262	6.902e-07	0.0252628	Late	CD8.CM																								PLEKHF1	1.61498	1.9233e-08	0.00070396	LP	CD8.TEX
NCOA1	-0.432327	7.0761e-07	0.0259001	Late	CD8.CM																								PTPRC	0.358441	1.9565e-08	0.00071612	LP	CD8.TEX
PRKCQ	-0.514591	7.1991e-07	0.0263502	Late	CD8.CM																								FYB1	0.614591	2.3605e-08	0.000864	LP	CD8.TEX
CHST11	-0.460897	7.5576e-07	0.0276624	Late	CD8.CM																								ABRACL	0.919459	2.3795e-08	0.00087096	LP	CD8.TEX
CCND3	-0.399145	8.059e-07	0.0294976	Late	CD8.CM																								LINC00861	0.631638	2.5034e-08	0.00091631	LP	CD8.TEX
KLRG1	-0.590386	8.9032e-07	0.0325875	Late	CD8.CM																								BCLAF1	-0.711127	2.5169e-08	0.00092122	LP	CD8.TEX
BTN3A2	-0.583047	9.653e-07	0.0353318	Late	CD8.CM																								HOPX	0.740823	2.8471e-08	0.00104211	LP	CD8.TEX
LYZ	0.339291	1.2787e-06	0.0468038	Late	CD8.CM																								HLA-DRB5	0.794875	3.2527e-08	0.00119057	LP	CD8.TEX
SLC25A3	0.350116	1.3124e-06	0.0480377	Late	CD8.CM																								SAMD9L	1.38065	3.7326e-08	0.00136621	LP	CD8.TEX
MT-ATP8	-0.618057	2.1505e-33	7.8713e-29	Late	CD8.EM																								TC2N	0.58395	4.1455e-08	0.00151733	LP	CD8.TEX
GNLY	-0.370948	4.7567e-28	1.7411e-23	Late	CD8.EM																								CD3D	0.335159	4.2838e-08	0.00156794	LP	CD8.TEX
MT-CYB	-0.484427	1.2752e-25	4.6674e-21	Late	CD8.EM																								DYNLL1	0.901557	4.3286e-08	0.00158436	LP	CD8.TEX
TIGIT	0.874193	1.9513e-25	7.1422e-21	Late	CD8.EM																								RAB2A	-0.689523	4.7082e-08	0.00172328	LP	CD8.TEX
BTG1	0.388556	2.0251e-25	7.4124e-21	Late	CD8.EM																								SNRPC	-0.458051	5.9437e-08	0.00217552	LP	CD8.TEX
CLDND1	0.677079	3.0627e-23	1.121e-18	Late	CD8.EM																								HMOX2	0.865906	5.945e-08	0.00217598	LP	CD8.TEX
MT-CO1	-0.428542	1.0034e-21	3.6725e-17	Late	CD8.EM																								HIST1H2AM	-0.823111	6.3189e-08	0.00231283	LP	CD8.TEX
MT-ND4L	-0.498375	2.5752e-21	9.4257e-17	Late	CD8.EM																								ATG2A	-1.84315	7.3283e-08	0.00268231	LP	CD8.TEX
MT-CO2	-0.404445	5.3264e-20	1.9496e-15	Late	CD8.EM																								JUNB	-0.647515	7.4665e-08	0.00273289	LP	CD8.TEX
MT-ATP6	-0.468201	1.6864e-19	6.1725e-15	Late	CD8.EM																								PLAAT4	0.545146	8.0008e-08	0.00292846	LP	CD8.TEX
MT-CO3	-0.384062	9.3432e-16	3.4198e-11	Late	CD8.EM																								RELB	-1.40649	8.8466e-08	0.00323804	LP	CD8.TEX
PDCD4	0.415431	3.1752e-14	1.1622e-09	Late	CD8.EM																								SYTL3	-1.08792	9.0516e-08	0.00331305	LP	CD8.TEX
HLA-DQB1	0.384401	4.7396e-14	1.7348e-09	Late	CD8.EM																								PELI1	-1.44922	9.0616e-08	0.00331672	LP	CD8.TEX
RPS4Y1	0.39243	8.7117e-13	3.1887e-08	Late	CD8.EM																								SRRM1	-0.455538	9.2912e-08	0.00340078	LP	CD8.TEX
MT-ND5	-0.388741	6.198e-12	2.2686e-07	Late	CD8.EM																								KRT10	-0.413927	1.0332e-07	0.00378163	LP	CD8.TEX
TSPYL2	0.714515	6.9765e-12	2.5535e-07	Late	CD8.EM																								C14orf119	1.34211	1.0985e-07	0.00402061	LP	CD8.TEX
PPP6R2	-0.480743	1.0653e-11	3.8993e-07	Late	CD8.EM																								CCDC107	0.542317	1.1119e-07	0.00406965	LP	CD8.TEX
KLRD1	-0.351007	2.3592e-11	8.6352e-07	Late	CD8.EM																								SBDS	-1.01929	1.1723e-07	0.00429077	LP	CD8.TEX
ZNF331	0.588874	1.308e-09	4.7874e-05	Late	CD8.EM																								DNAJB6	-0.61767	1.2381e-07	0.00453156	LP	CD8.TEX
MT-ND1	-0.334793	4.8305e-09	0.00017681	Late	CD8.EM																								IL10RA	0.573501	1.5832e-07	0.00579491	LP	CD8.TEX
HLA-DRB5	-0.360501	9.8487e-09	0.00036048	Late	CD8.EM																								TSC22D3	-0.678267	1.6513e-07	0.00604404	LP	CD8.TEX
ATF7IP2	-0.352786	1.1403e-08	0.00041738	Late	CD8.EM																								NAMPT	-0.502249	1.177e-66	4.308e-62	LP	Mono CD14
MT-ND4	-0.327392	4.7912e-08	0.00175368	Late	CD8.EM																								G0S2	-0.881772	2.0786e-59	7.608e-55	LP	Mono CD14
TTC39C	0.379227	5.6492e-08	0.00206772	Late	CD8.EM																								SAMSN1	-0.654053	2.7585e-55	1.0097e-50	LP	Mono CD14
TAOK3	-0.355925	1.8056e-07	0.00660887	Late	CD8.EM																								WARS	-0.547356	1.6204e-53	5.9309e-49	LP	Mono CD14
YBX3	0.466297	2.8337e-07	0.0103718	Late	CD8.EM																								FP236383.3	0.402092	8.8797e-39	3.2501e-34	LP	Mono CD14
GNLY	-0.55221	4.1994e-70	1.5371e-65	Late	CD8.EMRA.1																								CTNNB1	-0.748482	6.5135e-38	2.3841e-33	LP	Mono CD14
TIGIT	0.811023	6.1483e-30	2.2504e-25	Late	CD8.EMRA.1																								GBP2	-0.447158	5.735e-37	2.0991e-32	LP	Mono CD14
MT-ND3	-0.349086	9.3678e-24	3.4288e-19	Late	CD8.EMRA.1																								C20orf27	0.601118	9.5983e-37	3.5132e-32	LP	Mono CD14
MT-ATP8	-0.430924	1.4635e-23	5.3567e-19	Late	CD8.EMRA.1																								MALAT1	-0.474147	5.8149e-36	2.1284e-31	LP	Mono CD14
MT-CYB	-0.348555	2.2023e-22	8.0609e-18	Late	CD8.EMRA.1																								HIF1A	-0.427853	6.3202e-35	2.3133e-30	LP	Mono CD14
HLA-DQB1	0.497719	2.906e-18	1.0637e-13	Late	CD8.EMRA.1																								BCL2A1	-0.326895	1.6382e-34	5.9961e-30	LP	Mono CD14
MT-ATP6	-0.372359	1.4835e-16	5.4299e-12	Late	CD8.EMRA.1																								CDKN1A	-0.470317	1.6997e-33	6.2211e-29	LP	Mono CD14
CD8B2	-0.341817	4.9268e-16	1.8033e-11	Late	CD8.EMRA.1																								PDE4B	-0.708989	2.137e-33	7.8217e-29	LP	Mono CD14
TAGAP	0.388974	2.2074e-13	8.0795e-09	Late	CD8.EMRA.1																								FAM20A	-0.899467	4.6318e-33	1.6953e-28	LP	Mono CD14
HLA-DRB5	-0.418459	1.3464e-12	4.928e-08	Late	CD8.EMRA.1																								SIPA1L1	-0.518906	6.914e-32	2.5307e-27	LP	Mono CD14
PPP6R2	-0.407892	6.2126e-11	2.2739e-06	Late	CD8.EMRA.1																								PLAUR	-0.362296	9.2141e-30	3.3725e-25	LP	Mono CD14
ASCL2	-0.394742	9.1594e-11	3.3525e-06	Late	CD8.EMRA.1																								MT-ND4L	-0.571088	1.0322e-29	3.7781e-25	LP	Mono CD14
CLDND1	0.442515	1.3413e-10	4.9094e-06	Late	CD8.EMRA.1																								SNX9	-0.702068	1.3777e-28	5.0425e-24	LP	Mono CD14
LRRC8C	-0.334324	1.2695e-09	4.6467e-05	Late	CD8.EMRA.1																								GNA13	-0.537724	5.4437e-28	1.9925e-23	LP	Mono CD14
NCR3	-0.461508	1.5948e-09	5.8371e-05	Late	CD8.EMRA.1																								MAP3K8	-0.372386	2.132e-26	7.8035e-22	LP	Mono CD14
TSPAN32	-0.343658	1.7496e-09	6.4038e-05	Late	CD8.EMRA.1																								MT-CYB	-0.456535	1.1697e-25	4.2813e-21	LP	Mono CD14
NSF	-0.364702	2.0305e-09	7.4321e-05	Late	CD8.EMRA.1																								NRIP1	-0.630051	1.5015e-25	5.4958e-21	LP	Mono CD14
DYRK1A	-0.373426	3.1608e-07	0.0115692	Late	CD8.EMRA.1																								STAB1	0.529002	4.6766e-25	1.7117e-20	LP	Mono CD14
GNLY	-1.10507	1.0619e-39	3.8869e-35	Late	CD8.EMRA.2																								DDIT4	-0.570267	5.1911e-25	1.9e-20	LP	Mono CD14
RPS18	0.478738	2.0417e-25	7.4729e-21	Late	CD8.EMRA.2																								MT-CO2	-0.377558	1.0439e-24	3.8207e-20	LP	Mono CD14
RPS2	0.329637	2.4079e-23	8.8134e-19	Late	CD8.EMRA.2																								MAP2K1	-0.618398	1.4723e-24	5.3888e-20	LP	Mono CD14
KIR2DL3	-1.24384	2.8577e-17	1.046e-12	Late	CD8.EMRA.2																								HBEGF	-0.63386	2.1686e-24	7.9375e-20	LP	Mono CD14
XCL2	1.32505	3.6784e-16	1.3464e-11	Late	CD8.EMRA.2																								MIR181A1HG	-0.674342	1.4868e-23	5.4419e-19	LP	Mono CD14
RPS8	0.332636	3.07e-15	1.1237e-10	Late	CD8.EMRA.2																								RIPK2	-0.474258	2.2233e-23	8.1379e-19	LP	Mono CD14
GZMB	-0.506724	1.2018e-12	4.3989e-08	Late	CD8.EMRA.2																								ELF1	-0.34763	1.1042e-22	4.0415e-18	LP	Mono CD14
KIR3DL1	-1.1584	2.7659e-11	1.0124e-06	Late	CD8.EMRA.2																								ATP2B1	-0.364569	6.6534e-22	2.4353e-17	LP	Mono CD14
KIR2DL1	-1.4463	4.005e-11	1.4659e-06	Late	CD8.EMRA.2																								GAB2	-0.352298	9.4504e-22	3.459e-17	LP	Mono CD14
GZMK	0.771914	2.559e-10	9.3665e-06	Late	CD8.EMRA.2																								PTPRC	-0.340916	1.5455e-21	5.6567e-17	LP	Mono CD14
GAS5	0.972435	7.3537e-10	2.6916e-05	Late	CD8.EMRA.2																								BLVRB	0.33032	2.3638e-21	8.652e-17	LP	Mono CD14
KIR3DL2	-1.38183	3.743e-08	0.00137001	Late	CD8.EMRA.2																								JUN	0.761741	2.9372e-21	1.0751e-16	LP	Mono CD14
AOAH	0.469722	5.6422e-08	0.00206514	Late	CD8.EMRA.2																								CD86	-0.490622	3.1503e-21	1.1531e-16	LP	Mono CD14
MT-ND3	-0.369415	6.1405e-08	0.00224755	Late	CD8.EMRA.2																								ATP13A3	-0.535845	5.8544e-21	2.1428e-16	LP	Mono CD14
ALOX5AP	1.12679	9.2744e-08	0.00339461	Late	CD8.EMRA.2																								MT-ATP8	-0.620052	2.758e-20	1.0095e-15	LP	Mono CD14
DUSP2	0.686481	1.0233e-07	0.0037453	Late	CD8.EMRA.2																								MT-CO1	-0.356906	6.6063e-20	2.418e-15	LP	Mono CD14
TSPO	-0.431874	1.4476e-07	0.00529856	Late	CD8.EMRA.2																								LITAF	-0.42071	9.5233e-20	3.4857e-15	LP	Mono CD14
BHLHE40	-0.851332	1.6456e-07	0.00602315	Late	CD8.EMRA.2																								PSTPIP1	0.498175	2.457e-19	8.993e-15	LP	Mono CD14
COTL1	0.493474	2.0306e-07	0.00743231	Late	CD8.EMRA.2																								JARID2	-0.441515	9.6955e-19	3.5487e-14	LP	Mono CD14
RPL37A	0.332321	2.2087e-07	0.00808422	Late	CD8.EMRA.2																								FAM49A	-0.508471	1.1924e-18	4.3644e-14	LP	Mono CD14
MT-CO2	-0.37762	3.4017e-07	0.0124508	Late	CD8.EMRA.2																								CHD1	-0.456208	1.231e-18	4.5056e-14	LP	Mono CD14
BTG1	0.393066	5.3225e-07	0.0194816	Late	CD8.EMRA.2																								FP671120.4	0.359984	3.7504e-18	1.3727e-13	LP	Mono CD14
TYROBP	-0.817473	6.4886e-07	0.0237496	Late	CD8.EMRA.2																								NFAT5	-0.452598	8.1899e-18	2.9977e-13	LP	Mono CD14
CMC1	0.581447	6.5744e-07	0.0240637	Late	CD8.EMRA.2																								AGFG1	-0.343775	1.0653e-17	3.8993e-13	LP	Mono CD14
LGALS1	-0.376209	6.6471e-07	0.0243296	Late	CD8.EMRA.2																								PFKFB3	-0.347404	1.8505e-17	6.7732e-13	LP	Mono CD14
HLA-DQB1	0.993731	1.641e-42	6.0063e-38	Late	CD8.TEX																								NFIL3	-0.337373	5.6546e-17	2.0697e-12	LP	Mono CD14
MT-CYB	-0.820748	4.2757e-40	1.565e-35	Late	CD8.TEX																								LCP2	-0.377419	1.2585e-16	4.6064e-12	LP	Mono CD14
NFKBIA	-1.12072	4.6234e-36	1.6923e-31	Late	CD8.TEX																								TMEM176A	0.490829	1.4836e-16	5.4301e-12	LP	Mono CD14
GNLY	-0.73874	6.418e-36	2.3491e-31	Late	CD8.TEX																								MT-ND5	-0.385672	3.1582e-16	1.156e-11	LP	Mono CD14
EIF1	-0.371307	1.2334e-29	4.5145e-25	Late	CD8.TEX																								RAB20	-0.411079	3.4154e-16	1.2501e-11	LP	Mono CD14
MT-CO2	-0.65522	2.7495e-29	1.0064e-24	Late	CD8.TEX																								NCF4	0.469635	6.8017e-16	2.4896e-11	LP	Mono CD14
GIMAP4	0.431222	3.1554e-29	1.1549e-24	Late	CD8.TEX																								MT2A	0.372076	2.595e-15	9.4984e-11	LP	Mono CD14
MT-ND3	-0.523303	2.0569e-28	7.5288e-24	Late	CD8.TEX																								RAP1B	-0.360323	4.7124e-15	1.7248e-10	LP	Mono CD14
CXCR3	0.728297	1.624e-26	5.9441e-22	Late	CD8.TEX																								ATP1B3	-0.477362	1.1733e-14	4.2944e-10	LP	Mono CD14
MT-ATP8	-0.938533	1.8783e-26	6.8749e-22	Late	CD8.TEX																								FOSL2	-0.405151	2.0993e-14	7.6839e-10	LP	Mono CD14
HLA-DRB1	0.5904	1.5987e-25	5.8516e-21	Late	CD8.TEX																								RASGEF1B	-0.565399	4.0818e-14	1.494e-09	LP	Mono CD14
MT-CO3	-0.673097	1.8597e-25	6.8069e-21	Late	CD8.TEX																								LGALS2	0.454363	6.3209e-14	2.3136e-09	LP	Mono CD14
LINC01578	-0.461826	3.2278e-25	1.1814e-20	Late	CD8.TEX																								AP003086.1	-0.462616	1.0245e-13	3.7499e-09	LP	Mono CD14
MT-ATP6	-0.649807	2.1762e-23	7.9653e-19	Late	CD8.TEX																								RNF144B	-0.398711	1.1082e-13	4.0562e-09	LP	Mono CD14
MT-ND1	-0.70655	8.3724e-22	3.0645e-17	Late	CD8.TEX																								SFMBT2	-0.612192	1.2559e-13	4.5969e-09	LP	Mono CD14
IER2	-0.624812	1.6737e-21	6.126e-17	Late	CD8.TEX																								CD55	-0.379869	1.2889e-13	4.7177e-09	LP	Mono CD14
RBFOX2	0.493059	5.1987e-21	1.9028e-16	Late	CD8.TEX																								CYTIP	-0.413169	1.683e-13	6.16e-09	LP	Mono CD14
KLF10	-1.04865	1.2879e-20	4.7141e-16	Late	CD8.TEX																								MT-ND6	-0.46984	3.3752e-13	1.2354e-08	LP	Mono CD14
MT-ND2	-0.661856	4.5321e-20	1.6589e-15	Late	CD8.TEX																								SMDT1	0.328626	3.3815e-13	1.2377e-08	LP	Mono CD14
MT-ND4	-0.618284	6.1201e-18	2.2401e-13	Late	CD8.TEX																								UBASH3B	-0.593143	1.4666e-12	5.3681e-08	LP	Mono CD14
COTL1	0.52353	9.1461e-18	3.3477e-13	Late	CD8.TEX																								MALT1	-0.541653	1.4962e-12	5.4762e-08	LP	Mono CD14
IL7R	0.902173	1.1157e-17	4.0837e-13	Late	CD8.TEX																								GASK1B	0.348819	2.043e-12	7.4777e-08	LP	Mono CD14
MT-ND4L	-0.655866	1.2276e-17	4.4932e-13	Late	CD8.TEX																								B4GALT5	-0.395918	3.1195e-12	1.1418e-07	LP	Mono CD14
CD74	0.425855	1.308e-17	4.7877e-13	Late	CD8.TEX																								ZDHHC20	-0.356981	3.7334e-12	1.3665e-07	LP	Mono CD14
MT-CO1	-0.563994	1.6521e-17	6.047e-13	Late	CD8.TEX																								PHACTR1	-0.483123	4.7361e-12	1.7335e-07	LP	Mono CD14
ALOX5AP	0.622366	2.8284e-17	1.0352e-12	Late	CD8.TEX																								SGK1	-0.338444	6.7571e-12	2.4732e-07	LP	Mono CD14
GIMAP5	0.405239	3.0959e-15	1.1332e-10	Late	CD8.TEX																								HLA-DQB1	-0.324903	8.8237e-12	3.2297e-07	LP	Mono CD14
PRDM1	-0.770007	4.7538e-15	1.74e-10	Late	CD8.TEX																								TPCN1	0.446456	1.8115e-11	6.6304e-07	LP	Mono CD14
MX1	1.18198	5.6807e-15	2.0792e-10	Late	CD8.TEX																								FBXW7	-0.411684	2.4681e-11	9.0336e-07	LP	Mono CD14
RELB	-0.8332	5.8882e-15	2.1552e-10	Late	CD8.TEX																								CITED2	0.493652	2.7216e-11	9.9615e-07	LP	Mono CD14
HLA-DRA	0.424517	7.2068e-15	2.6378e-10	Late	CD8.TEX																								DOCK4	-0.444121	4.0589e-11	1.4856e-06	LP	Mono CD14
ATG2A	-0.867826	7.638e-15	2.7957e-10	Late	CD8.TEX																								ZFAND6	-0.422551	4.139e-11	1.515e-06	LP	Mono CD14
PIM3	-0.779663	2.5842e-14	9.4588e-10	Late	CD8.TEX																								PIK3R1	-0.36906	1.1236e-10	4.1125e-06	LP	Mono CD14
SLFN5	0.437521	6.6146e-14	2.4211e-09	Late	CD8.TEX																								ANKRD11	-0.359677	1.2321e-10	4.5098e-06	LP	Mono CD14
PPP6R2	-0.802571	3.5737e-13	1.3081e-08	Late	CD8.TEX																								CPD	-0.324974	1.4425e-10	5.2797e-06	LP	Mono CD14
CCNL1	-0.660188	1.0167e-12	3.7214e-08	Late	CD8.TEX																								SYAP1	-0.376324	1.5392e-10	5.6337e-06	LP	Mono CD14
TRA2B	-0.372471	1.0593e-12	3.8774e-08	Late	CD8.TEX																								RETN	0.932833	1.6547e-10	6.0567e-06	LP	Mono CD14
HNRNPF	0.34632	2.463e-12	9.015e-08	Late	CD8.TEX																								IER2	0.464141	1.7373e-10	6.3589e-06	LP	Mono CD14
RHOH	-0.483465	2.8187e-12	1.0317e-07	Late	CD8.TEX																								SNHG15	-0.434712	2.2954e-10	8.4015e-06	LP	Mono CD14
TPST2	0.400383	3.3223e-12	1.216e-07	Late	CD8.TEX																								PDE8A	-0.548247	2.348e-10	8.5941e-06	LP	Mono CD14
M6PR	0.37684	3.9674e-12	1.4521e-07	Late	CD8.TEX																								HNMT	0.426101	4.0179e-10	1.4706e-05	LP	Mono CD14
DUSP5	-0.780139	5.7613e-12	2.1087e-07	Late	CD8.TEX																								TMEM131	-0.406918	4.7827e-10	1.7506e-05	LP	Mono CD14
RBM39	-0.395088	7.4761e-12	2.7364e-07	Late	CD8.TEX																								AHCTF1	-0.486144	8.4884e-10	3.1069e-05	LP	Mono CD14
GZMK	0.495866	8.5949e-12	3.1459e-07	Late	CD8.TEX																								PTPN1	-0.374806	1.0493e-09	3.8405e-05	LP	Mono CD14
OAS1	1.02111	1.2451e-11	4.5572e-07	Late	CD8.TEX																								EML4	-0.3922	1.0701e-09	3.9167e-05	LP	Mono CD14
MT-ND5	-0.565989	1.7133e-11	6.2709e-07	Late	CD8.TEX																								NFE2	0.490487	2.5721e-09	9.4146e-05	LP	Mono CD14
HIST1H1C	-0.432854	1.7509e-11	6.4086e-07	Late	CD8.TEX																								GIMAP7	0.366859	7.1472e-09	0.0002616	LP	Mono CD14
SBDS	-0.688358	2.0981e-11	7.6796e-07	Late	CD8.TEX																								OXSR1	-0.474967	7.6658e-09	0.00028058	LP	Mono CD14
VPS37B	-0.492127	7.082e-11	2.5921e-06	Late	CD8.TEX																								EPB41L3	-0.412876	8.7319e-09	0.0003196	LP	Mono CD14
RBM38	-0.365189	8.4137e-11	3.0796e-06	Late	CD8.TEX																								TCF7L2	-0.419843	8.9099e-09	0.00032612	LP	Mono CD14
MAP3K8	-0.610653	1.5597e-10	5.7089e-06	Late	CD8.TEX																								PRKCE	-0.446711	1.045e-08	0.00038248	LP	Mono CD14
PDE4D	-0.635249	1.7556e-10	6.4257e-06	Late	CD8.TEX																								ECE1	-0.381016	1.0627e-08	0.00038899	LP	Mono CD14
LGALS3	0.64329	2.1732e-10	7.9545e-06	Late	CD8.TEX																								G0S2	-1.70664	9.5198e-64	3.4844e-59	LP	Mono CD16
PVRIG	1.03721	2.8998e-10	1.0614e-05	Late	CD8.TEX																								CDKN1A	-0.659474	1.8893e-60	6.9151e-56	LP	Mono CD16
UCP2	0.356467	3.0262e-10	1.1076e-05	Late	CD8.TEX																								TMEM176B	0.356628	9.6055e-45	3.5158e-40	LP	Mono CD16
RRP7A	0.638008	3.6333e-10	1.3299e-05	Late	CD8.TEX																								NAMPT	-0.515339	1.2107e-41	4.4316e-37	LP	Mono CD16
RPS10	0.68423	4.2095e-10	1.5408e-05	Late	CD8.TEX																								DDIT4	-0.771685	1.4012e-39	5.1288e-35	LP	Mono CD16
STAT1	0.499424	4.9794e-10	1.8225e-05	Late	CD8.TEX																								C20orf27	0.431122	1.1956e-35	4.3763e-31	LP	Mono CD16
RICTOR	-0.531243	5.3651e-10	1.9637e-05	Late	CD8.TEX																								FOS	-0.376248	1.553e-31	5.6843e-27	LP	Mono CD16
PTPRA	-0.370834	5.7659e-10	2.1104e-05	Late	CD8.TEX																								PIM3	-0.446462	4.978e-30	1.822e-25	LP	Mono CD16
SUCO	-0.844165	5.7884e-10	2.1187e-05	Late	CD8.TEX																								APOBEC3A	-0.331448	1.2695e-28	4.6465e-24	LP	Mono CD16
BHLHE40	-0.557911	5.8819e-10	2.1529e-05	Late	CD8.TEX																								TMEM176A	0.405609	5.344e-27	1.956e-22	LP	Mono CD16
MRPL23	0.88075	6.1768e-10	2.2608e-05	Late	CD8.TEX																								IL3RA	0.948687	7.1543e-25	2.6186e-20	LP	Mono CD16
EPSTI1	0.614973	8.9178e-10	3.2641e-05	Late	CD8.TEX																								SNHG15	-0.924562	2.3521e-24	8.6093e-20	LP	Mono CD16
SEPTIN9	0.399092	2.052e-09	7.5109e-05	Late	CD8.TEX																								AC004448.2	-0.372236	3.7117e-23	1.3586e-18	LP	Mono CD16
SELPLG	0.327076	2.1625e-09	7.9152e-05	Late	CD8.TEX																								ARL4C	-0.742419	2.6854e-22	9.8292e-18	LP	Mono CD16
CAMK4	0.38745	2.2299e-09	8.1618e-05	Late	CD8.TEX																								GIMAP7	0.809577	3.0755e-22	1.1257e-17	LP	Mono CD16
WHAMM	-0.402384	2.6716e-09	9.7787e-05	Late	CD8.TEX																								BTG2	-0.574831	1.0009e-21	3.6635e-17	LP	Mono CD16
AC004687.1	-0.721071	3.2683e-09	0.00011962	Late	CD8.TEX																								NFIL3	-0.532761	1.0214e-21	3.7386e-17	LP	Mono CD16
BTG3	-0.644331	3.8943e-09	0.00014254	Late	CD8.TEX																								SAMSN1	-0.430279	1.4383e-21	5.2644e-17	LP	Mono CD16
CDC42SE2	-0.372425	4.2639e-09	0.00015607	Late	CD8.TEX																								LFNG	0.327908	2.1931e-21	8.0271e-17	LP	Mono CD16
RASA2	-0.381905	4.2857e-09	0.00015687	Late	CD8.TEX																								CD83	-0.477037	2.2848e-21	8.3629e-17	LP	Mono CD16
C16orf54	0.604792	5.4625e-09	0.00019994	Late	CD8.TEX																								NXT1	-0.722901	2.6868e-19	9.8341e-15	LP	Mono CD16
EPC1	-0.326885	5.8289e-09	0.00021335	Late	CD8.TEX																								PIM1	-0.494366	1.3168e-17	4.8197e-13	LP	Mono CD16
JUN	-0.718238	8.0927e-09	0.00029621	Late	CD8.TEX																								CFD	0.376593	2.5364e-17	9.2838e-13	LP	Mono CD16
SRSF10	-0.374229	8.5736e-09	0.00031381	Late	CD8.TEX																								NEURL1	0.439038	8.5967e-17	3.1466e-12	LP	Mono CD16
ITGB1	0.335017	9.5167e-09	0.00034833	Late	CD8.TEX																								SASH1	0.760688	1.4875e-16	5.4444e-12	LP	Mono CD16
CBLB	-0.389244	1.2071e-08	0.00044183	Late	CD8.TEX																								GIMAP8	0.764932	4.2033e-16	1.5385e-11	LP	Mono CD16
NFAT5	-0.683455	1.3894e-08	0.00050856	Late	CD8.TEX																								KSR1	0.44751	3.9884e-15	1.4598e-10	LP	Mono CD16
ODC1	-0.385036	1.4323e-08	0.00052424	Late	CD8.TEX																								NR4A1	-0.596099	7.6137e-15	2.7868e-10	LP	Mono CD16
IL6ST	-0.946795	1.4515e-08	0.00053128	Late	CD8.TEX																								IFI44L	-0.362308	5.9181e-14	2.1661e-09	LP	Mono CD16
NFKBIZ	-0.770808	2.6591e-08	0.00097328	Late	CD8.TEX																								CTNND1	0.380815	7.9382e-14	2.9055e-09	LP	Mono CD16
SAMHD1	0.349101	2.9331e-08	0.00107358	Late	CD8.TEX																								ATF3	-0.574365	1.5163e-13	5.55e-09	LP	Mono CD16
PSME4	-0.58139	4.0589e-08	0.00148562	Late	CD8.TEX																								FAM110A	0.33124	4.8643e-13	1.7804e-08	LP	Mono CD16
TIGIT	0.548302	4.2041e-08	0.0015388	Late	CD8.TEX																								ZNF710	0.458904	6.0146e-13	2.2015e-08	LP	Mono CD16
GADD45B	-0.428366	6.4087e-08	0.0023457	Late	CD8.TEX																								SLFN5	0.458857	8.8623e-13	3.2438e-08	LP	Mono CD16
CREB1	-0.491562	8.007e-08	0.00293073	Late	CD8.TEX																								CTNNB1	-0.539331	9.6048e-13	3.5155e-08	LP	Mono CD16
FBXO33	-0.56426	8.7497e-08	0.00320255	Late	CD8.TEX																								RASGEF1B	-0.706994	1.2602e-12	4.6125e-08	LP	Mono CD16
MALAT1	-0.519935	9.7572e-08	0.00357133	Late	CD8.TEX																								HIF1A	-0.368277	1.7e-12	6.2225e-08	LP	Mono CD16
CD69	-0.405721	1.0326e-07	0.00377937	Late	CD8.TEX																								NRIP1	-0.580623	1.9673e-12	7.2008e-08	LP	Mono CD16
SRSF7	-0.368415	1.0685e-07	0.00391101	Late	CD8.TEX																								CARD19	-0.423624	4.306e-12	1.5761e-07	LP	Mono CD16
IRF7	0.585453	1.3143e-07	0.0048107	Late	CD8.TEX																								TNFRSF1A	0.584461	6.5024e-12	2.38e-07	LP	Mono CD16
LYST	-0.5286	1.319e-07	0.00482765	Late	CD8.TEX																								MIR22HG	-0.47885	1.1187e-11	4.0947e-07	LP	Mono CD16
RAB2A	-0.366053	1.4207e-07	0.00519987	Late	CD8.TEX																								DLEU1	0.511293	2.2945e-11	8.3982e-07	LP	Mono CD16
TNFSF10	0.55051	1.9863e-07	0.00727012	Late	CD8.TEX																								TNF	-0.598276	3.1416e-11	1.1499e-06	LP	Mono CD16
KRR1	-0.404396	2.0686e-07	0.00757161	Late	CD8.TEX																								SIDT2	0.348417	5.7172e-11	2.0926e-06	LP	Mono CD16
PELI1	-0.682068	2.1921e-07	0.00802338	Late	CD8.TEX																								HLA-DQB1	-0.362922	9.1222e-11	3.3389e-06	LP	Mono CD16
CBX4	-0.411291	2.2135e-07	0.00810177	Late	CD8.TEX																								SUFU	0.496857	1.2552e-10	4.5942e-06	LP	Mono CD16
RNF126	-0.335141	2.5142e-07	0.00920263	Late	CD8.TEX																								ADAMTSL4	0.526309	1.2727e-10	4.6583e-06	LP	Mono CD16
IRF2BP2	-0.447221	3.0754e-07	0.0112564	Late	CD8.TEX																								SCO2	-0.331317	2.2921e-10	8.3894e-06	LP	Mono CD16
MAT2B	0.327068	3.7479e-07	0.013718	Late	CD8.TEX																								CYFIP1	0.521185	2.8215e-10	1.0327e-05	LP	Mono CD16
ERAP2	0.621576	3.7851e-07	0.0138542	Late	CD8.TEX																								NOCT	-0.629668	3.336e-10	1.221e-05	LP	Mono CD16
CEMIP2	-0.544977	4.1982e-07	0.0153663	Late	CD8.TEX																								LYPD2	0.7757	4.0373e-10	1.4777e-05	LP	Mono CD16
KLRC4	0.674195	5.4023e-07	0.0197735	Late	CD8.TEX																								FOSL2	-0.323671	5.0212e-10	1.8379e-05	LP	Mono CD16
CDKN2A	0.427667	6.3755e-07	0.0233357	Late	CD8.TEX																								SNX9	-0.350961	5.5826e-10	2.0433e-05	LP	Mono CD16
MYLIP	-0.71872	6.4077e-07	0.0234533	Late	CD8.TEX																								ZNF217	0.392514	6.547e-10	2.3963e-05	LP	Mono CD16
ADGRG1	-0.446141	6.6726e-07	0.0244232	Late	CD8.TEX																								HIF1A-AS3	-0.638345	2.7303e-09	9.9935e-05	LP	Mono CD16
GIMAP6	0.575885	7.5084e-07	0.0274824	Late	CD8.TEX																								ING1	-0.423944	3.0845e-09	0.0001129	LP	Mono CD16
NUTM2A-AS1	-0.507598	7.6912e-07	0.0281514	Late	CD8.TEX																								GBP5	-0.470011	3.2799e-09	0.00012005	LP	Mono CD16
SNRPA1	-0.331421	8.0762e-07	0.0295606	Late	CD8.TEX																								TLE3	-0.445505	3.6837e-09	0.00013483	LP	Mono CD16
PLSCR1	0.679781	1.1895e-06	0.043539	Late	CD8.TEX																								RAB20	-0.418662	6.39e-09	0.00023389	LP	Mono CD16
TNFAIP3	1.30495	7.4604e-47	2.7307e-42	Very Late	CD4.CTL.GNLY																								OAT	-0.511224	2.2364e-08	0.00081857	LP	Mono CD16
RPS4Y1	-2.65595	1.8838e-41	6.8951e-37	Very Late	CD4.CTL.GNLY																								JARID2	-0.435288	2.4488e-08	0.00089632	LP	Mono CD16
CX3CR1	-1.13333	5.5963e-37	2.0484e-32	Very Late	CD4.CTL.GNLY																								MSR1	-0.328875	2.6304e-08	0.00096279	LP	Mono CD16
HLA-DRB5	0.720824	1.6028e-35	5.8667e-31	Very Late	CD4.CTL.GNLY																								ST6GAL1	0.360242	2.6727e-08	0.00097826	LP	Mono CD16
GIMAP7	-0.959059	3.7173e-35	1.3606e-30	Very Late	CD4.CTL.GNLY																								PIGX	0.336798	4.0103e-08	0.00146786	LP	Mono CD16
GIMAP5	-1.44243	5.6585e-29	2.0711e-24	Very Late	CD4.CTL.GNLY																								S100Z	0.323174	6.0529e-08	0.00221547	LP	Mono CD16
GIMAP4	-1.1428	1.1034e-28	4.0386e-24	Very Late	CD4.CTL.GNLY																								GATD3B	0.472377	1.1428e-07	0.00418279	LP	Mono CD16
DUSP2	1.1188	1.0519e-27	3.8502e-23	Very Late	CD4.CTL.GNLY																								PLK3	-0.46003	1.1858e-07	0.00434024	LP	Mono CD16
S100A11	-0.76749	4.571e-26	1.6731e-21	Very Late	CD4.CTL.GNLY																								GIMAP4	0.398452	1.6483e-07	0.00603316	LP	Mono CD16
RAC2	-0.473304	4.9829e-24	1.8238e-19	Very Late	CD4.CTL.GNLY																								WWOX	0.416131	1.7248e-07	0.00631325	LP	Mono CD16
CXCR4	1.07594	6.4994e-23	2.3789e-18	Very Late	CD4.CTL.GNLY																								VDAC3	0.37473	1.7669e-07	0.00646703	LP	Mono CD16
JUN	2.83588	1.4763e-22	5.4037e-18	Very Late	CD4.CTL.GNLY																								EHD4	-0.532825	1.9575e-07	0.00716482	LP	Mono CD16
KLRD1	1.19936	2.1088e-21	7.7185e-17	Very Late	CD4.CTL.GNLY																								TNFAIP8L2	0.572946	4.3001e-07	0.0157391	LP	Mono CD16
CTSC	-0.551037	5.7783e-20	2.115e-15	Very Late	CD4.CTL.GNLY																								PFKFB3	-0.374253	5.1577e-07	0.0188783	LP	Mono CD16
TENT5C	1.12963	7.0467e-19	2.5793e-14	Very Late	CD4.CTL.GNLY																								HDAC9	0.485725	8.2675e-07	0.0302606	LP	Mono CD16
HLA-DQA1	1.28097	9.9369e-19	3.6371e-14	Very Late	CD4.CTL.GNLY																								ULK2	0.352255	8.3802e-07	0.0306732	LP	Mono CD16
ACTG1	-0.435572	1.1973e-18	4.3825e-14	Very Late	CD4.CTL.GNLY																								FP236383.3	0.454761	1.7567e-49	6.4299e-45	LP	NK
SLC9A3R1	-0.478922	6.472e-18	2.3689e-13	Very Late	CD4.CTL.GNLY																								CXCR4	-0.845976	1.952e-37	7.1446e-33	LP	NK
DNAJB1	0.926684	9.9294e-18	3.6344e-13	Very Late	CD4.CTL.GNLY																								LAIR2	0.936434	1.9992e-34	7.3174e-30	LP	NK
JUNB	0.790931	2.2658e-17	8.2933e-13	Very Late	CD4.CTL.GNLY																								MAP3K8	-0.387752	3.8596e-34	1.4127e-29	LP	NK
PNRC1	0.323416	2.5782e-17	9.4368e-13	Very Late	CD4.CTL.GNLY																								CD69	-0.49385	1.8759e-32	6.8661e-28	LP	NK
ZFP36	0.643312	2.5829e-17	9.454e-13	Very Late	CD4.CTL.GNLY																								MT-ND4L	-0.387721	3.5427e-30	1.2967e-25	LP	NK
KLRK1	1.13311	8.5487e-17	3.129e-12	Very Late	CD4.CTL.GNLY																								CX3CR1	0.543807	2.4295e-29	8.8926e-25	LP	NK
ABLIM1	1.32452	1.3678e-16	5.0063e-12	Very Late	CD4.CTL.GNLY																								RAMP1	0.815894	1.5885e-28	5.8142e-24	LP	NK
HLA-DRA	0.850729	1.431e-16	5.2379e-12	Very Late	CD4.CTL.GNLY																								MT-ATP8	-0.570548	4.4669e-28	1.635e-23	LP	NK
RBM38	1.10761	2.0132e-16	7.3686e-12	Very Late	CD4.CTL.GNLY																								IFITM3	0.529451	5.8586e-28	2.1444e-23	LP	NK
CDCA7	1.57439	2.9504e-16	1.0799e-11	Very Late	CD4.CTL.GNLY																								DUSP1	-0.714628	9.2215e-28	3.3753e-23	LP	NK
CD69	0.935303	8.4138e-16	3.0796e-11	Very Late	CD4.CTL.GNLY																								ZFP36	-0.420357	6.6426e-26	2.4313e-21	LP	NK
PSMB10	-0.486151	3.0483e-15	1.1157e-10	Very Late	CD4.CTL.GNLY																								FP671120.4	0.4891	1.7092e-24	6.256e-20	LP	NK
ODC1	1.03768	4.4387e-15	1.6246e-10	Very Late	CD4.CTL.GNLY																								TENT5C	-0.522809	1.3648e-23	4.9953e-19	LP	NK
VAMP8	-0.701681	9.5013e-15	3.4777e-10	Very Late	CD4.CTL.GNLY																								DUSP2	-0.519357	1.7194e-21	6.2934e-17	LP	NK
ASCL2	-1.02343	1.2997e-14	4.7572e-10	Very Late	CD4.CTL.GNLY																								IL32	0.692854	1.6211e-18	5.9334e-14	LP	NK
HNRNPF	-0.649324	1.8994e-14	6.9521e-10	Very Late	CD4.CTL.GNLY																								SLFN5	0.351788	1.2487e-16	4.5706e-12	LP	NK
PER1	1.85926	2.3081e-14	8.4482e-10	Very Late	CD4.CTL.GNLY																								GFOD1	0.332182	1.3899e-15	5.0873e-11	LP	NK
CORO1A	-0.327804	4.1572e-14	1.5216e-09	Very Late	CD4.CTL.GNLY																								RHOH	-0.352095	2.184e-15	7.994e-11	LP	NK
PLAAT4	-0.412252	4.2658e-14	1.5614e-09	Very Late	CD4.CTL.GNLY																								TNFAIP3	-0.360149	7.9181e-15	2.8982e-10	LP	NK
PSME2	-0.4942	8.7472e-14	3.2016e-09	Very Late	CD4.CTL.GNLY																								NFKB1	-0.399189	4.2822e-13	1.5674e-08	LP	NK
GBP1	-1.37806	1.0445e-13	3.8231e-09	Very Late	CD4.CTL.GNLY																								JUNB	-0.46886	7.9456e-13	2.9082e-08	LP	NK
FTL	0.349434	1.2871e-13	4.7111e-09	Very Late	CD4.CTL.GNLY																								LFNG	0.481371	2.2034e-12	8.0648e-08	LP	NK
PTPRCAP	-0.323687	1.4602e-13	5.3447e-09	Very Late	CD4.CTL.GNLY																								PDE4D	-0.612808	5.1173e-12	1.873e-07	LP	NK
PSMB9	-0.345722	3.4788e-13	1.2733e-08	Very Late	CD4.CTL.GNLY																								CEMIP2	-0.554776	8.3459e-11	3.0548e-06	LP	NK
EIF1	0.375597	6.8549e-13	2.509e-08	Very Late	CD4.CTL.GNLY																								MT-ND6	-0.437642	1.0658e-10	3.9009e-06	LP	NK
CLIC1	-0.350312	7.4976e-13	2.7443e-08	Very Late	CD4.CTL.GNLY																								PTPN6	0.335648	1.933e-10	7.0751e-06	LP	NK
SYTL3	0.689938	1.0329e-12	3.7807e-08	Very Late	CD4.CTL.GNLY																								RELB	-0.370419	2.3129e-10	8.4656e-06	LP	NK
CD53	-0.593827	1.3307e-12	4.8704e-08	Very Late	CD4.CTL.GNLY																								ZBTB1	-0.345598	6.7717e-10	2.4786e-05	LP	NK
FLNA	0.490201	2.6808e-12	9.8124e-08	Very Late	CD4.CTL.GNLY																								BTG2	-0.566431	6.9086e-10	2.5287e-05	LP	NK
GBP5	-0.615497	3.3014e-12	1.2084e-07	Very Late	CD4.CTL.GNLY																								YES1	-0.424276	1.0074e-08	0.00036873	LP	NK
SPON2	-1.06425	8.0366e-12	2.9416e-07	Very Late	CD4.CTL.GNLY																								ARHGEF3	0.332106	1.8999e-08	0.00069542	LP	NK
ABI3	-0.931807	9.7349e-12	3.5632e-07	Very Late	CD4.CTL.GNLY																								EML4	-0.376821	4.503e-08	0.00164819	LP	NK
CD2	-0.445739	1.259e-11	4.608e-07	Very Late	CD4.CTL.GNLY																								MALAT1	-0.392689	8.4156e-08	0.0030803	LP	NK
TBC1D10C	-0.479396	2.1917e-11	8.0219e-07	Very Late	CD4.CTL.GNLY																								ANXA4	0.36655	1.171e-07	0.00428604	LP	NK
S1PR4	-0.812781	2.7572e-11	1.0092e-06	Very Late	CD4.CTL.GNLY																								REL	-0.352605	1.3109e-07	0.00479815	LP	NK
RUNX3	0.506918	2.888e-11	1.057e-06	Very Late	CD4.CTL.GNLY																								CHD1	-0.40011	3.8829e-07	0.0142122	LP	NK
CLDND1	1.01632	4.1944e-11	1.5352e-06	Very Late	CD4.CTL.GNLY																								RAB8B	-0.452181	8.9396e-07	0.0327206	LP	NK
PRF1	-0.349748	5.6527e-11	2.069e-06	Very Late	CD4.CTL.GNLY																								KBTBD2	-0.382771	1.1774e-06	0.0430944	LP	NK
STK17B	0.499539	5.8286e-11	2.1334e-06	Very Late	CD4.CTL.GNLY																								IFITM3	0.661866	1.3606e-65	4.98e-61	LP	NK CD56bright
UBC	0.352917	7.2213e-11	2.6431e-06	Very Late	CD4.CTL.GNLY																								NFKBIA	-0.493699	6.1542e-51	2.2526e-46	LP	NK CD56bright
ACTR3	-0.511259	1.0474e-10	3.8339e-06	Very Late	CD4.CTL.GNLY																								S100A11	0.452001	9.3222e-34	3.4121e-29	LP	NK CD56bright
CIRBP	0.456249	1.1244e-10	4.1155e-06	Very Late	CD4.CTL.GNLY																								TMEM173	0.515822	5.4641e-26	2e-21	LP	NK CD56bright
PIK3R1	0.564882	1.196e-10	4.3775e-06	Very Late	CD4.CTL.GNLY																								TSC22D3	-0.430406	5.9943e-26	2.194e-21	LP	NK CD56bright
APOBEC3G	-0.65324	2.0233e-10	7.4055e-06	Very Late	CD4.CTL.GNLY																								DUSP1	-0.837697	2.4089e-25	8.8169e-21	LP	NK CD56bright
PPP1R16B	0.799351	2.4072e-10	8.8108e-06	Very Late	CD4.CTL.GNLY																								PPP1R15A	-1.07004	5.3122e-24	1.9444e-19	LP	NK CD56bright
CAP1	-0.367194	3.3836e-10	1.2385e-05	Very Late	CD4.CTL.GNLY																								LYZ	1.21136	5.8476e-22	2.1403e-17	LP	NK CD56bright
TSC22D3	0.379451	6.8699e-10	2.5145e-05	Very Late	CD4.CTL.GNLY																								ZFP36	-0.421416	7.1305e-22	2.6099e-17	LP	NK CD56bright
C1orf162	-1.54303	6.9651e-10	2.5494e-05	Very Late	CD4.CTL.GNLY																								PIM3	-0.346891	3.0341e-21	1.1105e-16	LP	NK CD56bright
ATG2A	1.42625	7.2929e-10	2.6693e-05	Very Late	CD4.CTL.GNLY																								CD69	-0.440672	2.9264e-20	1.0711e-15	LP	NK CD56bright
LINC01578	0.487038	7.5106e-10	2.749e-05	Very Late	CD4.CTL.GNLY																								RAMP1	0.640491	4.6143e-18	1.6889e-13	LP	NK CD56bright
PTMS	0.821112	8.5086e-10	3.1143e-05	Very Late	CD4.CTL.GNLY																								CST3	0.43436	7.932e-17	2.9033e-12	LP	NK CD56bright
H3F3B	0.363547	9.2028e-10	3.3684e-05	Very Late	CD4.CTL.GNLY																								PYROXD2	0.38718	2.3045e-16	8.4348e-12	LP	NK CD56bright
DYNLL1	-0.693684	9.2551e-10	3.3876e-05	Very Late	CD4.CTL.GNLY																								FUT7	0.399561	2.5556e-16	9.354e-12	LP	NK CD56bright
SAMSN1	0.73432	9.8627e-10	3.61e-05	Very Late	CD4.CTL.GNLY																								AC004448.2	0.807503	3.2194e-15	1.1784e-10	LP	NK CD56bright
XBP1	-0.543289	1.0907e-09	3.9921e-05	Very Late	CD4.CTL.GNLY																								CXCR4	-0.567571	1.0457e-14	3.8276e-10	LP	NK CD56bright
PIM3	1.21999	1.1998e-09	4.3914e-05	Very Late	CD4.CTL.GNLY																								NFKBIZ	-0.325015	1.1358e-13	4.1572e-09	LP	NK CD56bright
STAT1	-0.485936	1.3438e-09	4.9186e-05	Very Late	CD4.CTL.GNLY																								PYCARD	0.331647	1.1846e-13	4.3358e-09	LP	NK CD56bright
CSK	-0.545554	1.9165e-09	7.0149e-05	Very Late	CD4.CTL.GNLY																								DUSP2	-0.402264	2.0299e-13	7.43e-09	LP	NK CD56bright
PDE4D	1.17857	2.4039e-09	8.7988e-05	Very Late	CD4.CTL.GNLY																								FP671120.4	0.58865	5.2648e-13	1.927e-08	LP	NK CD56bright
BRK1	-0.514473	2.475e-09	9.0589e-05	Very Late	CD4.CTL.GNLY																								GZMB	0.427005	9.6197e-13	3.521e-08	LP	NK CD56bright
PPP1R18	-0.464445	3.271e-09	0.00011973	Very Late	CD4.CTL.GNLY																								DYNLL1	0.341111	1.8966e-12	6.9419e-08	LP	NK CD56bright
RSRP1	0.348265	3.437e-09	0.0001258	Very Late	CD4.CTL.GNLY																								MT-ATP8	-0.378348	2.598e-12	9.5091e-08	LP	NK CD56bright
C14orf119	-1.19753	3.8493e-09	0.00014089	Very Late	CD4.CTL.GNLY																								SBDS	-0.38037	5.0758e-12	1.8578e-07	LP	NK CD56bright
SARAF	0.444285	6.0382e-09	0.00022101	Very Late	CD4.CTL.GNLY																								IL32	0.764247	5.571e-12	2.0391e-07	LP	NK CD56bright
PCBP1	-0.411188	8.1693e-09	0.00029901	Very Late	CD4.CTL.GNLY																								FP236383.3	0.376935	8.019e-12	2.9351e-07	LP	NK CD56bright
MAPK1IP1L	0.639132	9.5742e-09	0.00035043	Very Late	CD4.CTL.GNLY																								NOP10	0.367796	1.3264e-11	4.8551e-07	LP	NK CD56bright
BTG3	1.13896	1.0136e-08	0.00037101	Very Late	CD4.CTL.GNLY																								CCL5	-0.333666	1.6606e-11	6.0781e-07	LP	NK CD56bright
XIST	0.884738	1.0296e-08	0.00037685	Very Late	CD4.CTL.GNLY																								BTG2	-0.470707	2.223e-11	8.1365e-07	LP	NK CD56bright
TRAC	-0.726521	1.1501e-08	0.00042097	Very Late	CD4.CTL.GNLY																								LGALS1	0.787771	2.78e-11	1.0175e-06	LP	NK CD56bright
SNRK	0.681622	1.3151e-08	0.00048136	Very Late	CD4.CTL.GNLY																								ITGAX	0.370341	7.5153e-11	2.7507e-06	LP	NK CD56bright
SBDS	0.772126	1.3543e-08	0.00049572	Very Late	CD4.CTL.GNLY																								TENT5C	-0.423094	1.3558e-10	4.9625e-06	LP	NK CD56bright
NFKBIA	0.595476	1.5288e-08	0.00055959	Very Late	CD4.CTL.GNLY																								CSNK1G3	-0.424855	1.9265e-10	7.0512e-06	LP	NK CD56bright
TMX4	0.693536	1.5526e-08	0.00056826	Very Late	CD4.CTL.GNLY																								CLK1	-0.464711	3.094e-10	1.1325e-05	LP	NK CD56bright
VAMP2	0.38644	1.7619e-08	0.0006449	Very Late	CD4.CTL.GNLY																								RRBP1	0.372568	4.614e-10	1.6888e-05	LP	NK CD56bright
AC006369.1	0.862659	1.7911e-08	0.00065558	Very Late	CD4.CTL.GNLY																								CXCR3	0.368125	3.7112e-09	0.00013584	LP	NK CD56bright
GNAS	0.350173	2.2928e-08	0.00083921	Very Late	CD4.CTL.GNLY																								FOS	-0.758701	3.9593e-09	0.00014492	LP	NK CD56bright
PDGFD	0.824124	2.6059e-08	0.00095382	Very Late	CD4.CTL.GNLY																								TNFAIP3	-0.351038	2.8395e-08	0.00103931	LP	NK CD56bright
PYCARD	-0.401592	3.0626e-08	0.00112097	Very Late	CD4.CTL.GNLY																								RNMT	-0.341594	3.8784e-08	0.00141959	LP	NK CD56bright
PSMB8	-0.369758	4.4588e-08	0.00163201	Very Late	CD4.CTL.GNLY																								CLIC3	-0.330006	5.8157e-08	0.00212865	LP	NK CD56bright
PIM2	-1.07632	4.5325e-08	0.001659	Very Late	CD4.CTL.GNLY																								NXT1	-0.324757	1.1453e-07	0.00419212	LP	NK CD56bright
JUND	0.415713	6.1514e-08	0.00225153	Very Late	CD4.CTL.GNLY																								MALAT1	-0.354877	1.3009e-07	0.00476149	LP	NK CD56bright
SIT1	-0.638181	6.5745e-08	0.00240641	Very Late	CD4.CTL.GNLY																								HIST1H1D	-0.498512	5.1281e-07	0.01877	LP	NK CD56bright
HLA-F	-0.442666	6.9411e-08	0.00254059	Very Late	CD4.CTL.GNLY																								GIMAP6	0.452165	6.3412e-07	0.02321	LP	NK CD56bright
SELPLG	-0.408192	8.3517e-08	0.00305688	Very Late	CD4.CTL.GNLY																								MT-ND6	-0.341126	1.1102e-06	0.0406366	LP	NK CD56bright
CCL5	0.336241	8.4063e-08	0.00307686	Very Late	CD4.CTL.GNLY																								HLA-DQA2	1.77287	3.5666e-39	1.3054e-34	LP	cDC
AOAH	0.760722	1.3071e-07	0.00478435	Very Late	CD4.CTL.GNLY																								MAP3K8	-0.931188	2.1171e-36	7.7488e-32	LP	cDC
PSMA5	-0.571989	1.416e-07	0.00518276	Very Late	CD4.CTL.GNLY																								RPS4Y1	-0.994513	9.2698e-36	3.3929e-31	LP	cDC
PPP1R15A	1.03519	1.4763e-07	0.00540339	Very Late	CD4.CTL.GNLY																								AREG	-1.82159	1.6928e-34	6.1959e-30	LP	cDC
RORA	0.32373	1.5178e-07	0.00555563	Very Late	CD4.CTL.GNLY																								G0S2	-2.3848	4.7513e-33	1.7391e-28	LP	cDC
LINC01619	0.680431	1.5498e-07	0.00567241	Very Late	CD4.CTL.GNLY																								DDIT4	-0.903105	2.2379e-32	8.191e-28	LP	cDC
MRPS6	-0.672853	1.8113e-07	0.00662958	Very Late	CD4.CTL.GNLY																								ARL4C	-0.636091	2.5402e-31	9.2975e-27	LP	cDC
TAP1	-0.390714	1.9811e-07	0.00725132	Very Late	CD4.CTL.GNLY																								C20orf27	0.535597	1.9979e-30	7.3128e-26	LP	cDC
RAP1B	-0.350057	2.2847e-07	0.00836248	Very Late	CD4.CTL.GNLY																								FCGR2B	0.934241	1.0781e-29	3.946e-25	LP	cDC
LEPROTL1	0.588568	2.3373e-07	0.00855499	Very Late	CD4.CTL.GNLY																								HBEGF	-1.91202	2.0275e-29	7.4211e-25	LP	cDC
UBE2L6	-0.505032	2.4268e-07	0.00888269	Very Late	CD4.CTL.GNLY																								UBC	-0.47747	3.135e-29	1.1475e-24	LP	cDC
PTPRC	-0.331049	2.9456e-07	0.0107815	Very Late	CD4.CTL.GNLY																								NFIL3	-1.3627	5.2454e-29	1.9199e-24	LP	cDC
TRMT112	-0.396343	3.2784e-07	0.0119996	Very Late	CD4.CTL.GNLY																								CSRNP1	-1.25839	2.2226e-28	8.1352e-24	LP	cDC
CISD3	-0.477532	3.2946e-07	0.012059	Very Late	CD4.CTL.GNLY																								MIR22HG	-1.49155	2.3307e-28	8.5307e-24	LP	cDC
LITAF	0.32945	4.0546e-07	0.0148408	Very Late	CD4.CTL.GNLY																								MCL1	-0.480477	1.0391e-26	3.8035e-22	LP	cDC
ATP5IF1	-0.366457	4.6793e-07	0.017127	Very Late	CD4.CTL.GNLY																								GPR183	-0.931803	2.0131e-24	7.3683e-20	LP	cDC
CSTB	-0.568246	5.6996e-07	0.0208616	Very Late	CD4.CTL.GNLY																								CDKN1A	-0.891448	2.1132e-24	7.7347e-20	LP	cDC
MRPL34	-0.549332	5.8285e-07	0.0213333	Very Late	CD4.CTL.GNLY																								ARF6	-0.39281	2.238e-24	8.1913e-20	LP	cDC
MRPL51	-0.576727	7.8029e-07	0.0285602	Very Late	CD4.CTL.GNLY																								ENHO	0.712207	1.2056e-23	4.4127e-19	LP	cDC
SPN	-0.471215	8.1375e-07	0.029785	Very Late	CD4.CTL.GNLY																								NXT1	-1.12795	6.6486e-23	2.4335e-18	LP	cDC
RPL27A	-0.414649	9.1895e-07	0.0336356	Very Late	CD4.CTL.GNLY																								COG3	-1.08031	2.194e-22	8.0306e-18	LP	cDC
RNF19A	0.606757	9.5122e-07	0.0348164	Very Late	CD4.CTL.GNLY																								SAMHD1	0.47764	2.5928e-21	9.4903e-17	LP	cDC
TWF2	-0.517224	9.5583e-07	0.0349852	Very Late	CD4.CTL.GNLY																								LAPTM5	-0.323498	8.1241e-21	2.9736e-16	LP	cDC
IRF2	-0.852716	9.6665e-07	0.0353812	Very Late	CD4.CTL.GNLY																								CEBPB	-0.755792	2.4169e-20	8.8465e-16	LP	cDC
GBP4	-0.618869	9.9906e-07	0.0365676	Very Late	CD4.CTL.GNLY																								HERPUD1	-0.644048	4.6266e-20	1.6934e-15	LP	cDC
CEMIP2	0.577737	1.0636e-06	0.0389308	Very Late	CD4.CTL.GNLY																								RPS26	-0.483704	5.3542e-20	1.9597e-15	LP	cDC
DAD1	-0.412553	1.1069e-06	0.0405133	Very Late	CD4.CTL.GNLY																								CXCR4	-1.0612	1.5101e-19	5.5272e-15	LP	cDC
AC004448.2	0.632644	1.8882e-32	6.9112e-28	Very Late	CD4.NaiveLike																								CSTB	0.329383	1.4135e-18	5.1736e-14	LP	cDC
S100A11	-0.571887	1.4833e-16	5.4293e-12	Very Late	CD4.NaiveLike																								RAB20	-1.35363	3.3323e-18	1.2197e-13	LP	cDC
JUN	1.34165	1.781e-16	6.5189e-12	Very Late	CD4.NaiveLike																								PDE4B	-1.03638	3.3447e-18	1.2242e-13	LP	cDC
GZMA	-0.959696	1.7711e-15	6.4826e-11	Very Late	CD4.NaiveLike																								RBM39	-0.484452	5.4927e-18	2.0104e-13	LP	cDC
LINC01578	0.515808	4.3332e-14	1.586e-09	Very Late	CD4.NaiveLike																								JAML	0.420505	3.2358e-17	1.1844e-12	LP	cDC
JUND	0.487779	2.078e-13	7.6058e-09	Very Late	CD4.NaiveLike																								GNA13	-0.827552	4.1606e-17	1.5228e-12	LP	cDC
PSMB9	-0.430921	2.6957e-13	9.8669e-09	Very Late	CD4.NaiveLike																								AC004448.2	-0.643492	4.807e-17	1.7594e-12	LP	cDC
RBM38	1.00393	3.2923e-13	1.205e-08	Very Late	CD4.NaiveLike																								EPC1	-0.617338	1.6866e-16	6.1733e-12	LP	cDC
ARID5A	1.20195	4.7368e-13	1.7338e-08	Very Late	CD4.NaiveLike																								DBI	0.34351	2.672e-16	9.7802e-12	LP	cDC
NINJ1	1.07421	1.966e-11	7.196e-07	Very Late	CD4.NaiveLike																								DUSP2	-0.709127	8.3284e-16	3.0484e-11	LP	cDC
PER1	1.27002	2.3736e-11	8.6879e-07	Very Late	CD4.NaiveLike																								HIF1A	-0.492039	1.0082e-14	3.6904e-10	LP	cDC
CLIC1	-0.366784	4.0859e-11	1.4955e-06	Very Late	CD4.NaiveLike																								PLAUR	-0.670406	1.0983e-14	4.0199e-10	LP	cDC
BCL3	1.27542	6.0346e-11	2.2088e-06	Very Late	CD4.NaiveLike																								NR4A1	-0.973822	1.9364e-14	7.0877e-10	LP	cDC
PNRC1	0.324438	1.0713e-10	3.9213e-06	Very Late	CD4.NaiveLike																								CALM2	0.331804	2.0765e-14	7.6002e-10	LP	cDC
EIF1	0.38545	1.1746e-10	4.2991e-06	Very Late	CD4.NaiveLike																								HIST1H1E	-0.325592	2.2719e-14	8.3156e-10	LP	cDC
CIRBP	0.366156	1.837e-09	6.7236e-05	Very Late	CD4.NaiveLike																								PRDX1	0.557755	3.4491e-14	1.2624e-09	LP	cDC
LAPTM5	0.325929	2.0288e-09	7.4257e-05	Very Late	CD4.NaiveLike																								PPP1R15A	-0.492775	1.6547e-13	6.0565e-09	LP	cDC
ANXA1	-0.374618	4.3341e-09	0.00015864	Very Late	CD4.NaiveLike																								TNFRSF21	-1.22932	2.3682e-13	8.6679e-09	LP	cDC
NFKBIA	0.944292	4.3548e-09	0.00015939	Very Late	CD4.NaiveLike																								DYNLL1	0.381202	2.3926e-13	8.7573e-09	LP	cDC
TNFAIP3	0.790511	7.8277e-09	0.00028651	Very Late	CD4.NaiveLike																								SBDS	-0.887755	2.8079e-13	1.0278e-08	LP	cDC
GIMAP5	-0.649174	7.8352e-09	0.00028679	Very Late	CD4.NaiveLike																								HDAC9	0.70954	3.9143e-13	1.4327e-08	LP	cDC
STAT1	-0.804637	1.142e-08	0.00041801	Very Late	CD4.NaiveLike																								USP12	-0.909491	5.916e-13	2.1654e-08	LP	cDC
PIK3IP1	0.788746	1.8344e-08	0.00067142	Very Late	CD4.NaiveLike																								NR4A2	-0.635783	6.2969e-13	2.3048e-08	LP	cDC
BTG2	0.638244	4.3135e-08	0.00157884	Very Late	CD4.NaiveLike																								FOSL2	-0.871839	1.5354e-12	5.62e-08	LP	cDC
PSMB10	-0.339838	1.2899e-07	0.00472124	Very Late	CD4.NaiveLike																								KLF9	-0.817413	1.867e-12	6.8337e-08	LP	cDC
GIMAP4	-0.834436	1.4562e-07	0.00532994	Very Late	CD4.NaiveLike																								CD1C	0.475862	4.4869e-12	1.6423e-07	LP	cDC
PSMB8	-0.378137	1.7726e-07	0.00648822	Very Late	CD4.NaiveLike																								STX11	-0.485866	4.5094e-12	1.6505e-07	LP	cDC
ZFP36	0.670089	1.8094e-07	0.00662274	Very Late	CD4.NaiveLike																								GNA15	-0.555662	7.2407e-12	2.6502e-07	LP	cDC
RHBDD2	0.750158	4.1429e-07	0.0151637	Very Late	CD4.NaiveLike																								TNFAIP8L2	0.791706	9.0583e-12	3.3155e-07	LP	cDC
PLAAT4	-0.423198	4.6627e-07	0.0170665	Very Late	CD4.NaiveLike																								MIDN	-0.464942	1.2864e-11	4.7085e-07	LP	cDC
TOB1	1.01777	5.6094e-07	0.0205315	Very Late	CD4.NaiveLike																								GABARAPL1	-1.33616	1.4121e-11	5.1687e-07	LP	cDC
SLC40A1	1.01653	6.6979e-07	0.0245155	Very Late	CD4.NaiveLike																								CDKN2D	-0.487118	1.7206e-11	6.2977e-07	LP	cDC
FTH1	0.419666	8.5876e-07	0.0314322	Very Late	CD4.NaiveLike																								NAMPT	-0.474878	2.0938e-11	7.6636e-07	LP	cDC
RUNX3	0.381255	1.133e-06	0.0414696	Very Late	CD4.NaiveLike																								CXXC5	-0.683055	2.284e-11	8.3599e-07	LP	cDC
GZMK	-0.893075	1.1686e-06	0.0427732	Very Late	CD4.NaiveLike																								SNX9	-0.804476	2.3733e-11	8.6867e-07	LP	cDC
OSER1	0.814779	1.1785e-06	0.0431363	Very Late	CD4.NaiveLike																								GRASP	-0.627311	2.5347e-11	9.2775e-07	LP	cDC
HIST1H4C	0.494591	1.2459e-06	0.0456034	Very Late	CD4.NaiveLike																								TRAF3IP3	0.665837	3.0449e-11	1.1145e-06	LP	cDC
CNOT1	0.541915	1.2524e-06	0.0458388	Very Late	CD4.NaiveLike																								TENT4B	-0.789819	5.416e-11	1.9824e-06	LP	cDC
GNLY	-1.1676	2.4526e-20	8.977e-16	Very Late	CD8.CM																								SAMSN1	-0.590139	6.0447e-11	2.2125e-06	LP	cDC
RBM38	1.53182	3.5833e-20	1.3115e-15	Very Late	CD8.CM																								RIPK2	-0.722411	9.2211e-11	3.3751e-06	LP	cDC
RPS26	-0.519614	3.4667e-19	1.2689e-14	Very Late	CD8.CM																								RGS2	-0.598683	9.922e-11	3.6316e-06	LP	cDC
TNFAIP3	0.929184	1.6566e-15	6.0637e-11	Very Late	CD8.CM																								FGL2	0.396654	1.3023e-10	4.7668e-06	LP	cDC
FTH1	0.539539	3.6085e-15	1.3208e-10	Very Late	CD8.CM																								PER1	-0.69281	1.4056e-10	5.1448e-06	LP	cDC
JUN	1.56375	7.6676e-13	2.8065e-08	Very Late	CD8.CM																								MS4A6A	0.335974	1.7302e-10	6.333e-06	LP	cDC
EIF1	0.505267	1.0367e-12	3.7946e-08	Very Late	CD8.CM																								RBM38	-1.03558	2.0674e-10	7.5671e-06	LP	cDC
RUNX3	0.527239	1.9897e-12	7.2828e-08	Very Late	CD8.CM																								MARCKS	0.80841	2.1595e-10	7.904e-06	LP	cDC
PSMB9	-0.334249	7.8764e-12	2.8829e-07	Very Late	CD8.CM																								GAB2	-0.752764	2.1821e-10	7.9868e-06	LP	cDC
SARAF	0.825278	9.9726e-12	3.6502e-07	Very Late	CD8.CM																								TLE3	-0.713539	2.3993e-10	8.7818e-06	LP	cDC
NOSIP	-0.466135	1.297e-11	4.7472e-07	Very Late	CD8.CM																								NDUFAF3	0.487509	3.0015e-10	1.0986e-05	LP	cDC
JUND	0.631471	2.0346e-11	7.447e-07	Very Late	CD8.CM																								TSC22D3	-0.428719	3.3606e-10	1.23e-05	LP	cDC
KLF3	0.657263	2.0951e-10	7.6684e-06	Very Late	CD8.CM																								SELPLG	0.48686	3.6407e-10	1.3326e-05	LP	cDC
LINC01578	0.496347	1.181e-09	4.3226e-05	Very Late	CD8.CM																								MRPL20	0.417098	3.7565e-10	1.375e-05	LP	cDC
CREM	1.39895	1.3279e-09	4.8605e-05	Very Late	CD8.CM																								IL1R2	0.940202	4.9878e-10	1.8256e-05	LP	cDC
ARID5A	1.56739	1.4149e-09	5.1787e-05	Very Late	CD8.CM																								BCL3	-0.425885	5.367e-10	1.9644e-05	LP	cDC
PIK3R1	0.840442	2.226e-09	8.1474e-05	Very Late	CD8.CM																								CTNNB1	-0.572757	5.5462e-10	2.03e-05	LP	cDC
HNRNPL	0.552678	7.5449e-09	0.00027616	Very Late	CD8.CM																								AL135905.2	-0.64754	5.5648e-10	2.0368e-05	LP	cDC
GZMA	-0.361814	2.0801e-08	0.00076137	Very Late	CD8.CM																								CSF1R	0.607847	8.8529e-10	3.2404e-05	LP	cDC
S100A4	-0.42598	2.1278e-08	0.00077882	Very Late	CD8.CM																								MRPL51	0.43395	9.2677e-10	3.3922e-05	LP	cDC
CLIC1	-0.454535	2.2149e-08	0.00081069	Very Late	CD8.CM																								SOCS3	-0.603392	1.3213e-09	4.8363e-05	LP	cDC
CRIP1	-0.576203	2.4546e-08	0.00089843	Very Late	CD8.CM																								HCK	0.429169	1.4744e-09	5.3968e-05	LP	cDC
EML4	0.437125	3.9495e-08	0.00144561	Very Late	CD8.CM																								PIK3R1	-0.564691	1.8336e-09	6.7112e-05	LP	cDC
AC004448.2	-0.620158	5.8434e-08	0.00213879	Very Late	CD8.CM																								CFP	0.342248	1.8939e-09	6.9319e-05	LP	cDC
PNRC1	0.41799	1.127e-07	0.00412513	Very Late	CD8.CM																								LPXN	0.589671	2.8392e-09	0.00010392	LP	cDC
YPEL5	0.488152	1.8935e-07	0.00693076	Very Late	CD8.CM																								GTF2B	-0.479038	2.8922e-09	0.00010586	LP	cDC
VPS37B	0.563886	2.527e-07	0.00924943	Very Late	CD8.CM																								SGK1	-0.761928	2.9674e-09	0.00010861	LP	cDC
CSNK1D	0.728459	2.6527e-07	0.00970946	Very Late	CD8.CM																								LRMDA	0.375924	3.0261e-09	0.00011076	LP	cDC
CD5	0.724843	3.2866e-07	0.0120296	Very Late	CD8.CM																								GABARAPL2	0.435924	3.1501e-09	0.0001153	LP	cDC
SYAP1	0.624675	4.1716e-07	0.015269	Very Late	CD8.CM																								TIPARP	-0.970961	3.2261e-09	0.00011808	LP	cDC
DYNLL1	-0.870963	6.3872e-07	0.0233784	Very Late	CD8.CM																								YPEL5	-0.432859	3.3565e-09	0.00012286	LP	cDC
SELENOK	0.46986	6.696e-07	0.0245086	Very Late	CD8.CM																								RBBP6	-0.456418	4.4792e-09	0.00016395	LP	cDC
PER1	1.03854	7.2223e-07	0.0264352	Very Late	CD8.CM																								CHKA	-0.669654	7.7253e-09	0.00028276	LP	cDC
SRGN	0.491697	7.6049e-07	0.0278355	Very Late	CD8.CM																								RTN1	0.59211	8.5913e-09	0.00031446	LP	cDC
FYN	0.564091	8.5137e-07	0.0311619	Very Late	CD8.CM																								NAIP	0.463696	8.6636e-09	0.0003171	LP	cDC
CD63	-0.657186	8.7955e-07	0.0321933	Very Late	CD8.CM																								TRDV1	-0.473071	2.8026e-30	1.0258e-25	LP	gdT
TSPYL2	1.04448	9.1684e-07	0.0335582	Very Late	CD8.CM																								MT-ATP8	0.764958	3.2209e-30	1.1789e-25	LP	gdT
CHD1	0.472156	9.3381e-07	0.0341795	Very Late	CD8.CM																								RPS4Y1	0.79969	8.5046e-30	3.1129e-25	LP	gdT
CD8B2	-0.560069	1.0072e-06	0.0368651	Very Late	CD8.CM																								IFITM1	-0.427551	3.1747e-27	1.162e-22	LP	gdT
RIOK3	0.587423	1.0087e-06	0.0369189	Very Late	CD8.CM																								MT-CO3	0.743183	1.6744e-24	6.1288e-20	LP	gdT
CD52	-0.387072	1.2483e-06	0.0456892	Very Late	CD8.CM																								FP236383.3	0.68731	1.1545e-23	4.2257e-19	LP	gdT
RHBDD2	0.674583	1.2715e-06	0.0465395	Very Late	CD8.CM																								IFITM2	-0.528189	1.2197e-22	4.4642e-18	LP	gdT
JUN	2.30428	1.2866e-51	4.7092e-47	Very Late	CD8.EM																								KLRG1	0.89176	7.4842e-19	2.7394e-14	LP	gdT
CTSW	-0.428245	2.3873e-41	8.738e-37	Very Late	CD8.EM																								MT-CO2	0.55623	4.7305e-17	1.7315e-12	LP	gdT
RPS29	0.377128	3.5192e-40	1.2881e-35	Very Late	CD8.EM																								TRDV2	2.3666	1.8501e-16	6.7718e-12	LP	gdT
KLRD1	-1.14408	1.3489e-39	4.9374e-35	Very Late	CD8.EM																								ANXA1	0.615249	2.1298e-16	7.7953e-12	LP	gdT
GNLY	-1.37944	7.2076e-39	2.6381e-34	Very Late	CD8.EM																								LAIR2	1.47873	4.2494e-16	1.5554e-11	LP	gdT
CD74	0.667668	1.1008e-35	4.029e-31	Very Late	CD8.EM																								KIR3DL2	-0.759551	9.8818e-16	3.6169e-11	LP	gdT
TNFAIP3	1.02384	6.7636e-32	2.4756e-27	Very Late	CD8.EM																								MT-ND3	0.581494	1.1352e-15	4.1551e-11	LP	gdT
CLDND1	1.47378	2.5753e-31	9.4263e-27	Very Late	CD8.EM																								KIR2DL3	-1.35559	1.1599e-15	4.2456e-11	LP	gdT
CD27	0.684728	1.3489e-30	4.9372e-26	Very Late	CD8.EM																								MT-ND4L	0.569966	3.9034e-15	1.4287e-10	LP	gdT
JUND	0.702273	1.0612e-27	3.8842e-23	Very Late	CD8.EM																								CDC42	-0.422814	9.9057e-15	3.6257e-10	LP	gdT
MT-CYB	-0.632678	1.388e-27	5.0804e-23	Very Late	CD8.EM																								HLA-DRB1	-0.489189	2.8007e-14	1.0251e-09	LP	gdT
PRF1	-0.583489	6.3225e-27	2.3141e-22	Very Late	CD8.EM																								MT-ND1	0.471695	1.0699e-13	3.9161e-09	LP	gdT
LINC02446	-0.791263	4.1668e-26	1.5251e-21	Very Late	CD8.EM																								CCL4	-2.71794	1.3606e-13	4.9802e-09	LP	gdT
PMAIP1	2.19109	1.6521e-24	6.047e-20	Very Late	CD8.EM																								CCL5	-0.346637	1.1886e-12	4.3506e-08	LP	gdT
PHACTR2	0.594891	2.2102e-24	8.0896e-20	Very Late	CD8.EM																								MT-CO1	0.391519	1.6907e-12	6.1882e-08	LP	gdT
H3F3B	0.539366	2.4484e-24	8.9618e-20	Very Late	CD8.EM																								MT-ND5	0.545934	5.472e-12	2.0029e-07	LP	gdT
GZMH	-0.491041	5.314e-24	1.945e-19	Very Late	CD8.EM																								MT-CYB	0.437413	7.9089e-12	2.8948e-07	LP	gdT
S100A4	-0.415694	1.797e-23	6.5775e-19	Very Late	CD8.EM																								KLRD1	-0.526413	1.4056e-11	5.1448e-07	LP	gdT
H1FX	0.866488	8.8238e-21	3.2297e-16	Very Late	CD8.EM																								GZMH	-0.442254	5.0147e-11	1.8355e-06	LP	gdT
BTG1	0.493791	3.3718e-20	1.2341e-15	Very Late	CD8.EM																								FCRL6	-0.57534	5.2196e-11	1.9105e-06	LP	gdT
GZMK	0.607506	7.0218e-20	2.5701e-15	Very Late	CD8.EM																								IL7R	1.80118	8.5322e-11	3.123e-06	LP	gdT
RNF19A	0.804492	1.1971e-19	4.3817e-15	Very Late	CD8.EM																								PZP	1.36044	1.7582e-10	6.4354e-06	LP	gdT
KLRK1	-0.55822	7.3397e-19	2.6865e-14	Very Late	CD8.EM																								CD74	-0.449363	7.5986e-10	2.7812e-05	LP	gdT
FGR	-0.858135	1.235e-17	4.5204e-13	Very Late	CD8.EM																								MT-ND4	0.511735	1.7901e-09	6.5521e-05	LP	gdT
HLA-DQB1	0.909169	1.2602e-17	4.6124e-13	Very Late	CD8.EM																								SPOCK2	0.877148	4.1753e-09	0.00015283	LP	gdT
NFKBIZ	1.41479	1.5236e-16	5.5766e-12	Very Late	CD8.EM																								GZMK	1.35531	1.1922e-08	0.00043637	LP	gdT
PPP1R16B	0.871636	3.0528e-16	1.1174e-11	Very Late	CD8.EM																								ADGRG1	-0.43881	2.4329e-08	0.00089048	LP	gdT
MT-ATP8	-0.64227	3.4168e-16	1.2506e-11	Very Late	CD8.EM																								TRG-AS1	-0.78434	2.9736e-08	0.00108839	LP	gdT
FCRL6	-0.769832	3.8018e-16	1.3915e-11	Very Late	CD8.EM																								HIST1H1D	-0.60195	1.2889e-07	0.00471766	LP	gdT
HOPX	-0.623951	4.2395e-16	1.5517e-11	Very Late	CD8.EM																								CXCR4	0.478014	2.9489e-07	0.0107935	LP	gdT
NFKB1	1.00564	4.3714e-16	1.6e-11	Very Late	CD8.EM																								PSTPIP1	0.851807	4.0632e-07	0.0148723	LP	gdT
FGFBP2	-0.478688	5.2963e-16	1.9386e-11	Very Late	CD8.EM																								PHACTR2	1.15736	4.5627e-07	0.0167005	LP	gdT
TAB2	0.910173	1.0296e-15	3.7686e-11	Very Late	CD8.EM																								MBP	-0.432883	5.1188e-07	0.018736	LP	gdT
EML4	0.489304	1.1751e-15	4.301e-11	Very Late	CD8.EM																								SLC25A5	-0.394068	6.398e-07	0.023418	LP	gdT
RBM38	1.05559	1.2416e-15	4.5444e-11	Very Late	CD8.EM																								CD5	1.0665	7.3832e-07	0.027024	LP	gdT
EIF1	0.4667	1.4191e-15	5.1942e-11	Very Late	CD8.EM																								HLA-DRA	-0.529649	7.6586e-07	0.0280319	LP	gdT
GIMAP5	-0.675141	3.3384e-15	1.2219e-10	Very Late	CD8.EM																								NAP1L4	-0.442214	1.1195e-06	0.0409772	LP	gdT
IFITM2	-0.40056	3.3998e-15	1.2444e-10	Very Late	CD8.EM																								STK17A	-0.396527	1.1914e-06	0.0436091	LP	gdT
PIK3R1	0.62647	4.6327e-15	1.6957e-10	Very Late	CD8.EM																								RPS4Y1	-0.921622	1.9763e-26	7.2338e-22	LP	pDC
ATG2A	1.35451	5.3431e-15	1.9557e-10	Very Late	CD8.EM																								LINC00996	1.15458	9.4092e-23	3.4439e-18	LP	pDC
STK17B	0.398403	7.0856e-15	2.5935e-10	Very Late	CD8.EM																								ZFAT	0.584313	1.3788e-20	5.0466e-16	LP	pDC
HLA-DRA	0.650418	1.1435e-14	4.1854e-10	Very Late	CD8.EM																								RABGAP1L	0.498681	2.344e-19	8.5795e-15	LP	pDC
CCND3	-0.506731	1.1651e-14	4.2646e-10	Very Late	CD8.EM																								CUX2	0.733455	2.9167e-19	1.0676e-14	LP	pDC
SARAF	0.572517	1.6804e-14	6.1507e-10	Very Late	CD8.EM																								RPS3A	-0.326214	3.0983e-17	1.134e-12	LP	pDC
BTG3	1.01896	6.9741e-14	2.5527e-09	Very Late	CD8.EM																								CST3	-0.333378	1.6142e-16	5.9083e-12	LP	pDC
CDV3	0.351655	9.9005e-14	3.6238e-09	Very Late	CD8.EM																								LAPTM4A	-0.524071	5.3207e-16	1.9475e-11	LP	pDC
MT-CO1	-0.509942	1.5811e-13	5.7872e-09	Very Late	CD8.EM																								ZFP36	-0.467307	5.8711e-16	2.1489e-11	LP	pDC
GIMAP4	-0.59828	1.8643e-13	6.8238e-09	Very Late	CD8.EM																								RUNX2	0.37832	1.2499e-15	4.575e-11	LP	pDC
DNAJB6	0.669686	2.7675e-13	1.013e-08	Very Late	CD8.EM																								PLXNA4	0.679168	3.354e-15	1.2276e-10	LP	pDC
PIM3	1.32967	3.2038e-13	1.1726e-08	Very Late	CD8.EM																								TCF4	0.343835	6.4401e-15	2.3572e-10	LP	pDC
SIK3	0.540244	3.4918e-13	1.2781e-08	Very Late	CD8.EM																								H3F3B	-0.358355	2.0881e-14	7.643e-10	LP	pDC
UBC	0.405771	5.7738e-13	2.1133e-08	Very Late	CD8.EM																								CD99	-0.409555	3.292e-14	1.2049e-09	LP	pDC
CDK2AP2	-0.719921	8.0749e-13	2.9556e-08	Very Late	CD8.EM																								RPS26	-0.38882	5.4362e-14	1.9898e-09	LP	pDC
DUSP2	0.644445	8.2367e-13	3.0148e-08	Very Late	CD8.EM																								CARD11	0.475791	1.5832e-13	5.7947e-09	LP	pDC
KLF6	0.446972	8.5441e-13	3.1273e-08	Very Late	CD8.EM																								SUSD1	0.647278	6.4591e-13	2.3642e-08	LP	pDC
HMGB2	0.651403	1.8717e-12	6.8507e-08	Very Late	CD8.EM																								DACH1	0.722043	6.7284e-13	2.4627e-08	LP	pDC
BTG2	0.833981	4.1509e-12	1.5193e-07	Very Late	CD8.EM																								HDAC9	0.687639	1.6526e-12	6.049e-08	LP	pDC
NDUFS5	0.393472	6.4192e-12	2.3496e-07	Very Late	CD8.EM																								PTPRS	0.428166	2.4273e-12	8.8845e-08	LP	pDC
MATK	-0.3579	1.3887e-11	5.083e-07	Very Late	CD8.EM																								WWOX	0.369611	8.3194e-12	3.0451e-07	LP	pDC
ADGRE5	0.627522	1.6961e-11	6.2079e-07	Very Late	CD8.EM																								TBC1D4	0.439274	1.5054e-11	5.5099e-07	LP	pDC
S100A11	-0.415041	2.1264e-11	7.7832e-07	Very Late	CD8.EM																								RHEX	0.553941	1.7053e-11	6.2418e-07	LP	pDC
SLC9A3R1	-0.339439	2.3084e-11	8.4491e-07	Very Late	CD8.EM																								AFF3	0.368744	2.2889e-11	8.3779e-07	LP	pDC
MT-CO2	-0.431872	3.2533e-11	1.1908e-06	Very Late	CD8.EM																								RSRP1	0.438987	3.0166e-11	1.1041e-06	LP	pDC
CX3CR1	-0.51528	5.2832e-11	1.9338e-06	Very Late	CD8.EM																								PAN3	0.573577	3.2284e-11	1.1816e-06	LP	pDC
LINC01578	0.469665	5.5628e-11	2.0361e-06	Very Late	CD8.EM																								TBC1D5	0.368825	3.8621e-11	1.4136e-06	LP	pDC
RAB8B	0.487998	6.3553e-11	2.3262e-06	Very Late	CD8.EM																								KRT10	-0.395319	7.8494e-11	2.873e-06	LP	pDC
BTN3A2	-0.63921	6.5566e-11	2.3999e-06	Very Late	CD8.EM																								RASD1	-0.759435	1.3298e-10	4.8674e-06	LP	pDC
RASA2	0.470034	6.5696e-11	2.4046e-06	Very Late	CD8.EM																								RBM38	-0.766473	1.5096e-10	5.5254e-06	LP	pDC
ZFC3H1	0.511855	1.01e-10	3.6968e-06	Very Late	CD8.EM																								ZDHHC14	0.404679	2.4342e-10	8.9097e-06	LP	pDC
ARID5A	1.12719	1.4591e-10	5.3406e-06	Very Late	CD8.EM																								AUTS2	0.372714	2.6737e-10	9.7864e-06	LP	pDC
YPEL5	0.574552	2.1155e-10	7.743e-06	Very Late	CD8.EM																								JUND	-0.418524	3.3015e-10	1.2084e-05	LP	pDC
PDE4B	0.922903	2.1603e-10	7.907e-06	Very Late	CD8.EM																								LINC01478	0.352356	3.5841e-10	1.3118e-05	LP	pDC
ZC3HAV1	0.556392	2.7294e-10	9.9901e-06	Very Late	CD8.EM																								DIPK1A	0.793807	4.1167e-10	1.5068e-05	LP	pDC
GBP1	-0.637423	2.7513e-10	1.007e-05	Very Late	CD8.EM																								RBM3	-0.368445	5.7238e-10	2.095e-05	LP	pDC
PTGER4	0.912349	3.046e-10	1.1149e-05	Very Late	CD8.EM																								IQGAP2	0.334887	5.8064e-10	2.1252e-05	LP	pDC
GIMAP7	-0.55538	3.103e-10	1.1358e-05	Very Late	CD8.EM																								SMIM3	-0.850425	1.5325e-09	5.6093e-05	LP	pDC
CD63	-0.486883	3.1296e-10	1.1455e-05	Very Late	CD8.EM																								GPR183	-0.81007	1.7032e-09	6.234e-05	LP	pDC
NEAT1	0.343969	4.0299e-10	1.475e-05	Very Late	CD8.EM																								ERN1	0.372888	2.4998e-09	9.1497e-05	LP	pDC
RELB	1.12105	6.5429e-10	2.3948e-05	Very Late	CD8.EM																								LINC01684	0.866149	2.589e-09	9.4761e-05	LP	pDC
CDK17	0.423051	7.3148e-10	2.6773e-05	Very Late	CD8.EM																								UVRAG	0.36777	4.4378e-09	0.00016243	LP	pDC
APOBEC3G	-0.471898	7.3359e-10	2.6851e-05	Very Late	CD8.EM																								RNF213	0.548153	4.6894e-09	0.00017164	LP	pDC
CLK1	0.434787	7.3573e-10	2.6929e-05	Very Late	CD8.EM																								ARID1B	0.517655	4.949e-09	0.00018114	LP	pDC
AKAP13	0.373268	9.5939e-10	3.5116e-05	Very Late	CD8.EM																								WDFY4	0.346091	5.6208e-09	0.00020573	LP	pDC
MT-ND4L	-0.409071	1.1133e-09	4.0747e-05	Very Late	CD8.EM																								ZDHHC17	0.386309	5.8141e-09	0.00021281	LP	pDC
MYBL1	-0.686161	1.4551e-09	5.3261e-05	Very Late	CD8.EM																								EIF1AY	-0.980823	9.5566e-09	0.00034979	LP	pDC
ZDHHC20	0.436216	1.5187e-09	5.5587e-05	Very Late	CD8.EM																								PIK3CD	0.58425	1.1506e-08	0.00042116	LP	pDC
SYNGR2	-0.34616	1.815e-09	6.6434e-05	Very Late	CD8.EM																								TNRC6B	0.525514	1.1868e-08	0.0004344	LP	pDC
QKI	0.562502	1.8764e-09	6.8681e-05	Very Late	CD8.EM																								AC007381.1	0.36555	1.2445e-08	0.00045553	LP	pDC
CDKN2A	0.591751	2.1313e-09	7.8012e-05	Very Late	CD8.EM																								CUEDC1	0.485633	1.5894e-08	0.00058176	LP	pDC
MT-ND5	-0.465157	2.9533e-09	0.0001081	Very Late	CD8.EM																								PLAUR	-0.987886	1.5915e-08	0.00058252	LP	pDC
PPP1R18	-0.419321	3.2961e-09	0.00012065	Very Late	CD8.EM																								MAPKAP1	0.888057	1.844e-08	0.00067494	LP	pDC
TRAC	-0.437649	4.2394e-09	0.00015517	Very Late	CD8.EM																								XIST	0.646318	1.9342e-08	0.00070794	LP	pDC
AOAH	-0.566055	4.6563e-09	0.00017043	Very Late	CD8.EM																								ARMH1	0.589937	2.0315e-08	0.00074356	LP	pDC
EFHD2	-0.427522	5.1065e-09	0.00018691	Very Late	CD8.EM																								CXCR3	-0.384608	2.1007e-08	0.0007689	LP	pDC
ADGRG1	-0.65708	5.2549e-09	0.00019234	Very Late	CD8.EM																								MGAT4A	-0.373608	2.895e-08	0.00105964	LP	pDC
EZR	0.431588	5.9068e-09	0.0002162	Very Late	CD8.EM																								PAG1	0.416483	3.6846e-08	0.00134864	LP	pDC
PRR5	-0.488922	6.0719e-09	0.00022224	Very Late	CD8.EM																								KYNU	0.643636	5.76e-08	0.00210829	LP	pDC
TIGIT	0.689128	7.099e-09	0.00025984	Very Late	CD8.EM																								CD68	-0.338797	7.3299e-08	0.00268289	LP	pDC
XBP1	-0.363119	7.2137e-09	0.00026403	Very Late	CD8.EM																								SLC12A3	0.677699	8.2597e-08	0.00302322	LP	pDC
RGS19	-0.502205	8.6016e-09	0.00031484	Very Late	CD8.EM																								RGS7	0.576361	1.0808e-07	0.00395609	LP	pDC
ARL6IP5	-0.368017	1.2312e-08	0.00045066	Very Late	CD8.EM																								NPC1	0.492443	1.1865e-07	0.00434266	LP	pDC
KLF3	0.602678	1.2749e-08	0.00046665	Very Late	CD8.EM																								PBX3	0.395582	1.252e-07	0.0045825	LP	pDC
PET100	0.3788	1.2894e-08	0.00047193	Very Late	CD8.EM																								DDHD1	0.913339	1.291e-07	0.00472516	LP	pDC
WAC	0.335875	1.3895e-08	0.0005086	Very Late	CD8.EM																								DAAM1	0.638465	1.3832e-07	0.00506274	LP	pDC
LEPROTL1	0.747991	1.5538e-08	0.00056873	Very Late	CD8.EM																								ITGA4	0.452209	1.6134e-07	0.00590533	LP	pDC
PDZD8	0.775727	1.5924e-08	0.00058284	Very Late	CD8.EM																								TTC39C	0.422052	1.7237e-07	0.00630924	LP	pDC
GNA13	0.543488	1.6815e-08	0.00061546	Very Late	CD8.EM																								LINC00910	1.11793	1.8276e-07	0.00668953	LP	pDC
CLIC3	-0.454704	1.8097e-08	0.00066237	Very Late	CD8.EM																								DNASE1L3	0.642064	1.8921e-07	0.00692563	LP	pDC
SDF2L1	-0.421415	1.898e-08	0.0006947	Very Late	CD8.EM																								ZBTB20	0.339953	2.4441e-07	0.00894606	LP	pDC
MIR4435-2HG	0.419488	1.9254e-08	0.00070474	Very Late	CD8.EM																								UBALD2	-0.427829	2.9062e-07	0.0106374	LP	pDC
PSME4	0.532172	2.5255e-08	0.00092439	Very Late	CD8.EM																								MYO1E	0.40606	2.9876e-07	0.0109352	LP	pDC
RNMT	0.581913	2.997e-08	0.00109695	Very Late	CD8.EM																								S100PBP	0.63841	3.7801e-07	0.013836	LP	pDC
FP236383.3	0.389256	3.8433e-08	0.00140673	Very Late	CD8.EM																								PAFAH2	1.35529	3.8023e-07	0.0139171	LP	pDC
FAM160B1	0.636722	4.1648e-08	0.0015244	Very Late	CD8.EM																								PLXNC1	0.991371	3.9075e-07	0.0143022	LP	pDC
TBX21	-0.49846	4.4916e-08	0.00164403	Very Late	CD8.EM																								SORL1	0.343444	3.9916e-07	0.0146099	LP	pDC
SMS	0.572856	4.8756e-08	0.00178456	Very Late	CD8.EM																								KRT5	-1.60787	4.1147e-07	0.0150605	LP	pDC
COTL1	0.561559	5.8365e-08	0.00213628	Very Late	CD8.EM																								SBDS	-0.671934	4.5741e-07	0.016742	LP	pDC
CD69	0.55858	5.8599e-08	0.00214485	Very Late	CD8.EM																								RSBN1L	0.8161	4.6849e-07	0.0171476	LP	pDC
RANBP2	0.358921	8.293e-08	0.0030354	Very Late	CD8.EM																								SFMBT2	0.379504	5.1517e-07	0.0188562	LP	pDC
DDX21	0.386538	9.1932e-08	0.0033649	Very Late	CD8.EM																								ARHGAP24	0.411338	5.1572e-07	0.0188763	LP	pDC
RIOK3	0.584044	9.8435e-08	0.00360291	Very Late	CD8.EM																								WDFY2	0.55609	5.4969e-07	0.0201198	LP	pDC
DYNLL1	-0.584296	1.14e-07	0.00417254	Very Late	CD8.EM																								VAV3	0.337183	6.035e-07	0.0220892	LP	pDC
DDX3X	0.441191	1.4665e-07	0.00536781	Very Late	CD8.EM																								NEDD9	0.625031	6.4976e-07	0.0237824	LP	pDC
PSMA5	-0.324105	1.5025e-07	0.00549933	Very Late	CD8.EM																								TRAPPC8	0.661972	6.826e-07	0.0249847	LP	pDC
TENT5C	0.583601	1.5312e-07	0.00560443	Very Late	CD8.EM																								DAPP1	0.563388	7.8705e-07	0.0288075	LP	pDC
CYTOR	0.408697	1.6339e-07	0.00598055	Very Late	CD8.EM																								NOTCH2	0.620576	8.0222e-07	0.0293628	LP	pDC
CNOT1	0.398726	1.7879e-07	0.00654414	Very Late	CD8.EM																								SIVA1	-0.53291	8.8614e-07	0.0324347	LP	pDC
OSTF1	-0.397196	1.933e-07	0.00707508	Very Late	CD8.EM																								GTF2I	0.467068	9.1012e-07	0.0333123	LP	pDC
CNOT2	0.391214	2.0911e-07	0.00765389	Very Late	CD8.EM																								COL24A1	0.616173	1.0071e-06	0.0368628	LP	pDC
HMOX2	-0.347469	2.4961e-07	0.00913618	Very Late	CD8.EM																								PRKCA	0.459365	1.0515e-06	0.0384854	LP	pDC
SLC2A3	0.654669	2.8934e-07	0.0105903	Very Late	CD8.EM																								FP236383.3	0.662384	1.1082e-06	0.0405634	LP	pDC
TRAF3IP3	-0.407533	3.2235e-07	0.0117986	Very Late	CD8.EM																								ST3GAL2	0.602838	1.2298e-06	0.0450144	LP	pDC
B3GNT2	0.72338	3.41e-07	0.0124811	Very Late	CD8.EM																								CARMIL1	0.906896	1.2709e-06	0.0465172	LP	pDC
MFSD14A	0.448065	3.8722e-07	0.0141731	Very Late	CD8.EM																								TRAPPC9	0.53323	1.3587e-06	0.0497329	LP	pDC
DNAJB1	0.68121	4.3194e-07	0.01581	Very Late	CD8.EM																								CD27	2.08253	4.5718e-41	1.6734e-36	Late	CD4.CTL.EOMES
RASGRP2	-0.352977	4.3198e-07	0.0158113	Very Late	CD8.EM																								ANXA1	-0.938122	3.6716e-29	1.3439e-24	Late	CD4.CTL.EOMES
NDUFAF3	-0.437541	4.5311e-07	0.0165848	Very Late	CD8.EM																								C1orf162	-2.67219	6.7508e-27	2.4709e-22	Late	CD4.CTL.EOMES
GIMAP1	-0.565086	4.6618e-07	0.0170632	Very Late	CD8.EM																								IL7R	-0.912317	3.5225e-24	1.2893e-19	Late	CD4.CTL.EOMES
HIST1H1C	0.79178	4.8453e-07	0.0177349	Very Late	CD8.EM																								KLRG1	-1.35458	7.7175e-24	2.8247e-19	Late	CD4.CTL.EOMES
SYAP1	0.640985	5.3628e-07	0.0196288	Very Late	CD8.EM																								LINC00892	-1.92083	1.1285e-22	4.1305e-18	Late	CD4.CTL.EOMES
CLEC2D	-0.524575	6.2397e-07	0.0228387	Very Late	CD8.EM																								CAR-BCMA	4.24285	2.5051e-20	9.1693e-16	Late	CD4.CTL.EOMES
DSTN	-0.439472	7.2686e-07	0.0266046	Very Late	CD8.EM																								ALOX5AP	-1.02997	5.3363e-19	1.9532e-14	Late	CD4.CTL.EOMES
SORL1	0.471872	7.5659e-07	0.0276927	Very Late	CD8.EM																								HOPX	-1.77532	3.6145e-18	1.323e-13	Late	CD4.CTL.EOMES
RHOH	0.473867	9.1185e-07	0.0333755	Very Late	CD8.EM																								GIMAP4	-0.703275	1.5446e-17	5.6537e-13	Late	CD4.CTL.EOMES
RNF115	0.457813	9.1725e-07	0.0335731	Very Late	CD8.EM																								NKG7	-0.88257	4.419e-17	1.6174e-12	Late	CD4.CTL.EOMES
PYHIN1	-0.613726	1.0054e-06	0.0367987	Very Late	CD8.EM																								CD40LG	-1.68745	2.4886e-16	9.1087e-12	Late	CD4.CTL.EOMES
SBDS	0.633034	1.0219e-06	0.0374026	Very Late	CD8.EM																								CX3CR1	-1.32307	2.5242e-15	9.2389e-11	Late	CD4.CTL.EOMES
ATP6V0E1	-0.354045	1.0615e-06	0.038854	Very Late	CD8.EM																								UBC	0.340521	3.6548e-15	1.3377e-10	Late	CD4.CTL.EOMES
BATF	-0.696381	1.0926e-06	0.0399928	Very Late	CD8.EM																								EIF1	0.397932	6.3287e-15	2.3164e-10	Late	CD4.CTL.EOMES
TERF2IP	0.454344	1.1048e-06	0.040439	Very Late	CD8.EM																								PHACTR2	-0.775428	5.9857e-14	2.1909e-09	Late	CD4.CTL.EOMES
ABI3	-0.532243	1.2639e-06	0.0462614	Very Late	CD8.EM																								ABRACL	-0.794402	1.1803e-13	4.32e-09	Late	CD4.CTL.EOMES
HLA-DMA	0.533027	1.3288e-06	0.0486375	Very Late	CD8.EM																								PIM1	-1.05876	2.6295e-13	9.6246e-09	Late	CD4.CTL.EOMES
GNLY	-0.94513	2.2806e-72	8.3474e-68	Very Late	CD8.EMRA.1																								GNLY	1.41965	4.3867e-13	1.6056e-08	Late	CD4.CTL.EOMES
JUN	2.64827	1.1595e-65	4.2439e-61	Very Late	CD8.EMRA.1																								PTGER2	-1.21673	1.2567e-12	4.5998e-08	Late	CD4.CTL.EOMES
RPS29	0.495074	1.0892e-63	3.9866e-59	Very Late	CD8.EMRA.1																								GIMAP5	-0.792627	1.7308e-12	6.335e-08	Late	CD4.CTL.EOMES
S100A4	-0.333614	2.0081e-55	7.3502e-51	Very Late	CD8.EMRA.1																								GZMH	-1.11587	2.6398e-12	9.6623e-08	Late	CD4.CTL.EOMES
EIF1	0.518367	5.5578e-38	2.0343e-33	Very Late	CD8.EMRA.1																								RBFOX2	0.506379	3.3076e-12	1.2106e-07	Late	CD4.CTL.EOMES
TNFAIP3	0.994819	3.7941e-36	1.3887e-31	Very Late	CD8.EMRA.1																								RPS19	-0.355088	5.5026e-12	2.014e-07	Late	CD4.CTL.EOMES
ASCL2	-0.748702	5.0419e-33	1.8454e-28	Very Late	CD8.EMRA.1																								SAMHD1	-0.477557	7.3153e-12	2.6775e-07	Late	CD4.CTL.EOMES
KLRD1	-0.553697	5.0353e-30	1.843e-25	Very Late	CD8.EMRA.1																								LINC01871	-0.561859	7.502e-12	2.7459e-07	Late	CD4.CTL.EOMES
PRF1	-0.36342	1.3393e-29	4.9021e-25	Very Late	CD8.EMRA.1																								IFNG-AS1	-1.34754	1.7759e-11	6.5002e-07	Late	CD4.CTL.EOMES
GIMAP4	-0.698362	3.7987e-29	1.3904e-24	Very Late	CD8.EMRA.1																								CTSC	-0.645743	2.7867e-11	1.02e-06	Late	CD4.CTL.EOMES
SLC9A3R1	-0.331264	4.0351e-29	1.4769e-24	Very Late	CD8.EMRA.1																								RPS26	0.404773	4.5297e-11	1.6579e-06	Late	CD4.CTL.EOMES
RBM38	1.09637	5.2059e-29	1.9055e-24	Very Late	CD8.EMRA.1																								NFKBIA	0.919985	4.8187e-11	1.7637e-06	Late	CD4.CTL.EOMES
TENT5C	1.14116	1.2422e-28	4.5466e-24	Very Late	CD8.EMRA.1																								DPP4	-1.36329	8.073e-11	2.9549e-06	Late	CD4.CTL.EOMES
H3F3B	0.552639	2.6132e-27	9.5648e-23	Very Late	CD8.EMRA.1																								EPC1	0.461139	9.3034e-11	3.4052e-06	Late	CD4.CTL.EOMES
CEMIP2	0.772309	1.3662e-25	5.0004e-21	Very Late	CD8.EMRA.1																								HLA-DRB5	-1.24961	1.4707e-10	5.383e-06	Late	CD4.CTL.EOMES
GIMAP7	-0.633562	2.6627e-25	9.7462e-21	Very Late	CD8.EMRA.1																								S100A11	-0.528382	2.005e-10	7.3389e-06	Late	CD4.CTL.EOMES
S100A11	-0.473844	1.409e-23	5.1573e-19	Very Late	CD8.EMRA.1																								WHAMM	0.659944	2.0522e-10	7.5115e-06	Late	CD4.CTL.EOMES
CD53	-0.463346	1.7792e-23	6.5123e-19	Very Late	CD8.EMRA.1																								RHOH	0.591548	2.2291e-10	8.159e-06	Late	CD4.CTL.EOMES
DUSP2	0.866148	2.5026e-22	9.1601e-18	Very Late	CD8.EMRA.1																								STOM	-0.91284	3.922e-10	1.4355e-05	Late	CD4.CTL.EOMES
FYN	0.322728	4.5711e-22	1.6731e-17	Very Late	CD8.EMRA.1																								FGFBP2	-1.39374	4.0868e-10	1.4959e-05	Late	CD4.CTL.EOMES
JUND	0.630088	4.8549e-22	1.777e-17	Very Late	CD8.EMRA.1																								PMAIP1	1.28817	4.1126e-10	1.5053e-05	Late	CD4.CTL.EOMES
PSMB10	-0.343981	1.1249e-21	4.1175e-17	Very Late	CD8.EMRA.1																								HIVEP1	1.31287	7.8502e-10	2.8733e-05	Late	CD4.CTL.EOMES
NR4A2	1.55429	4.1037e-21	1.502e-16	Very Late	CD8.EMRA.1																								HLA-DQA1	0.597328	2.0014e-09	7.3256e-05	Late	CD4.CTL.EOMES
GIMAP5	-0.70038	4.8746e-21	1.7842e-16	Very Late	CD8.EMRA.1																								CD247	0.54605	2.6116e-09	9.5588e-05	Late	CD4.CTL.EOMES
CD69	0.75695	7.9815e-21	2.9214e-16	Very Late	CD8.EMRA.1																								CIRBP	0.384197	2.7591e-09	0.00010099	Late	CD4.CTL.EOMES
KLRK1	-0.437317	1.007e-19	3.6857e-15	Very Late	CD8.EMRA.1																								PSMB9	-0.493563	3.6574e-09	0.00013387	Late	CD4.CTL.EOMES
BTG2	0.949119	1.2994e-19	4.7561e-15	Very Late	CD8.EMRA.1																								KLF3	-0.472003	5.4201e-09	0.00019839	Late	CD4.CTL.EOMES
CCND3	-0.415711	7.3184e-19	2.6787e-14	Very Late	CD8.EMRA.1																								KLF10	1.44493	6.1186e-09	0.00022395	Late	CD4.CTL.EOMES
DYNLL1	-0.66229	1.1232e-18	4.1111e-14	Very Late	CD8.EMRA.1																								NFAT5	0.842292	8.3099e-09	0.00030416	Late	CD4.CTL.EOMES
CD300A	-0.748502	3.3893e-18	1.2406e-13	Very Late	CD8.EMRA.1																								BTG3	0.68817	8.7719e-09	0.00032107	Late	CD4.CTL.EOMES
ENC1	1.35906	5.7546e-18	2.1063e-13	Very Late	CD8.EMRA.1																								S100A8	-1.07629	1.6524e-08	0.0006048	Late	CD4.CTL.EOMES
ARL6IP5	-0.427866	1.4335e-17	5.2468e-13	Very Late	CD8.EMRA.1																								MBP	-0.599926	2.4189e-08	0.00088538	Late	CD4.CTL.EOMES
CD2	-0.420453	2.8422e-17	1.0403e-12	Very Late	CD8.EMRA.1																								USP28	-0.821801	2.8659e-08	0.00104898	Late	CD4.CTL.EOMES
PIK3R1	0.619437	4.2381e-17	1.5512e-12	Very Late	CD8.EMRA.1																								PSME2	-0.498923	3.1429e-08	0.00115036	Late	CD4.CTL.EOMES
PPP1R16B	0.861252	5.3451e-17	1.9564e-12	Very Late	CD8.EMRA.1																								KDM2A	0.606288	5.2603e-08	0.00192537	Late	CD4.CTL.EOMES
GBP1	-0.715705	9.596e-17	3.5123e-12	Very Late	CD8.EMRA.1																								DYNLL1	-0.747642	5.2832e-08	0.00193377	Late	CD4.CTL.EOMES
APOBEC3G	-0.426132	1.2947e-16	4.7388e-12	Very Late	CD8.EMRA.1																								TGFBR3	-0.820958	6.0529e-08	0.00221549	Late	CD4.CTL.EOMES
SLC2A3	0.863173	1.89e-16	6.9179e-12	Very Late	CD8.EMRA.1																								SBDS	0.815146	6.7369e-08	0.00246585	Late	CD4.CTL.EOMES
PLEKHF1	-0.659707	2.6625e-16	9.7452e-12	Very Late	CD8.EMRA.1																								PDE4B	-0.828825	1.1456e-07	0.00419311	Late	CD4.CTL.EOMES
CX3CR1	-0.551311	3.1537e-16	1.1543e-11	Very Late	CD8.EMRA.1																								FCRL6	-1.18433	1.1708e-07	0.00428546	Late	CD4.CTL.EOMES
ACTR3	-0.488338	3.2888e-16	1.2038e-11	Very Late	CD8.EMRA.1																								RPS27	0.465626	1.6839e-07	0.00616349	Late	CD4.CTL.EOMES
PCBP1	-0.342767	9.6879e-15	3.546e-10	Very Late	CD8.EMRA.1																								NINJ1	1.27861	1.6916e-07	0.00619175	Late	CD4.CTL.EOMES
ATG2A	1.1184	1.3058e-14	4.7794e-10	Very Late	CD8.EMRA.1																								LYST	0.96139	1.7371e-07	0.0063581	Late	CD4.CTL.EOMES
MT-CYB	-0.329037	3.4965e-14	1.2798e-09	Very Late	CD8.EMRA.1																								EFHD2	-0.85008	2.108e-07	0.00771576	Late	CD4.CTL.EOMES
DNAJB1	0.714221	3.8978e-14	1.4267e-09	Very Late	CD8.EMRA.1																								ARPC5	-0.421977	3e-07	0.0109807	Late	CD4.CTL.EOMES
KLF6	0.472901	7.8354e-14	2.8679e-09	Very Late	CD8.EMRA.1																								IL10RA	0.682049	3.3203e-07	0.012153	Late	CD4.CTL.EOMES
PYCARD	-0.424468	9.6835e-14	3.5444e-09	Very Late	CD8.EMRA.1																								GIMAP7	-0.363457	3.4205e-07	0.0125198	Late	CD4.CTL.EOMES
STAT1	-0.418519	1.0553e-13	3.8626e-09	Very Late	CD8.EMRA.1																								ACTR3	-0.492002	3.5993e-07	0.0131743	Late	CD4.CTL.EOMES
UBC	0.357312	2.3906e-13	8.7501e-09	Very Late	CD8.EMRA.1																								AC004687.1	0.773292	3.6788e-07	0.013465	Late	CD4.CTL.EOMES
CISD3	-0.400036	3.2387e-13	1.1854e-08	Very Late	CD8.EMRA.1																								CBX4	0.703871	3.8369e-07	0.0140438	Late	CD4.CTL.EOMES
METRNL	1.07018	5.423e-13	1.9849e-08	Very Late	CD8.EMRA.1																								KLRB1	-1.12797	3.9193e-07	0.0143453	Late	CD4.CTL.EOMES
TIGIT	0.54837	7.0401e-13	2.5768e-08	Very Late	CD8.EMRA.1																								ARHGEF3	-0.513557	4.3542e-07	0.0159372	Late	CD4.CTL.EOMES
DAD1	-0.414612	7.9081e-13	2.8945e-08	Very Late	CD8.EMRA.1																								ODC1	0.746272	4.6042e-07	0.0168524	Late	CD4.CTL.EOMES
FP671120.4	0.66471	9.1141e-13	3.3359e-08	Very Late	CD8.EMRA.1																								ATG2A	0.771475	4.9494e-07	0.0181158	Late	CD4.CTL.EOMES
SAMSN1	0.836795	1.2158e-12	4.45e-08	Very Late	CD8.EMRA.1																								MRPL14	-0.713753	5.3287e-07	0.0195041	Late	CD4.CTL.EOMES
NFAT5	0.411557	1.2957e-12	4.7426e-08	Very Late	CD8.EMRA.1																								HNRNPF	-0.595139	5.5249e-07	0.0202224	Late	CD4.CTL.EOMES
PDE4D	0.837778	1.5231e-12	5.5749e-08	Very Late	CD8.EMRA.1																								HSPD1	-0.856022	6.8235e-07	0.0249752	Late	CD4.CTL.EOMES
H1FX	0.704576	1.8474e-12	6.7617e-08	Very Late	CD8.EMRA.1																								GLIPR2	-0.725853	6.9931e-07	0.025596	Late	CD4.CTL.EOMES
BTG3	0.974372	2.3706e-12	8.6769e-08	Very Late	CD8.EMRA.1																								HEBP2	0.499152	7.2698e-07	0.0266089	Late	CD4.CTL.EOMES
NFKB1	0.745223	2.7493e-12	1.0063e-07	Very Late	CD8.EMRA.1																								CASP1	-0.886544	7.8362e-07	0.0286822	Late	CD4.CTL.EOMES
EML4	0.378565	3.4154e-12	1.2501e-07	Very Late	CD8.EMRA.1																								ID2	-0.619227	9.2847e-07	0.033984	Late	CD4.CTL.EOMES
PIM3	1.18097	3.6098e-12	1.3212e-07	Very Late	CD8.EMRA.1																								ZBP1	0.901966	9.5564e-07	0.0349783	Late	CD4.CTL.EOMES
TSPAN32	-0.441865	3.8286e-12	1.4013e-07	Very Late	CD8.EMRA.1																								HNRNPAB	-0.909424	9.8206e-07	0.0359452	Late	CD4.CTL.EOMES
RNF19A	0.510613	4.4066e-12	1.6129e-07	Very Late	CD8.EMRA.1																								SNHG3	0.807916	9.8315e-07	0.0359851	Late	CD4.CTL.EOMES
FGR	-0.50254	5.1956e-12	1.9017e-07	Very Late	CD8.EMRA.1																								LINC01578	0.43071	9.8751e-07	0.0361447	Late	CD4.CTL.EOMES
SYTL3	0.44853	5.2575e-12	1.9244e-07	Very Late	CD8.EMRA.1																								MCTP2	0.869815	1.0131e-06	0.0370832	Late	CD4.CTL.EOMES
CHD1	0.492154	7.2479e-12	2.6529e-07	Very Late	CD8.EMRA.1																								FKBP5	-0.546205	1.0183e-06	0.0372714	Late	CD4.CTL.EOMES
FCRL6	-0.355443	7.368e-12	2.6968e-07	Very Late	CD8.EMRA.1																								UCP2	-0.385227	1.1647e-06	0.0426315	Late	CD4.CTL.EOMES
LINC02446	-0.360915	8.1068e-12	2.9672e-07	Very Late	CD8.EMRA.1																								CLIC1	-0.35778	1.203e-06	0.0440324	Late	CD4.CTL.EOMES
TRMT112	-0.412545	8.7004e-12	3.1845e-07	Very Late	CD8.EMRA.1																								GNLY	1.39025	5.6025e-80	2.0506e-75	Late	CD4.CTL.GNLY
PTGER4	0.667036	9.2226e-12	3.3756e-07	Very Late	CD8.EMRA.1																								GZMB	1.47445	3.288e-71	1.2035e-66	Late	CD4.CTL.GNLY
PDCD4	0.346701	9.2804e-12	3.3968e-07	Very Late	CD8.EMRA.1																								RPS26	0.714759	8.2942e-67	3.0358e-62	Late	CD4.CTL.GNLY
NOSIP	-0.484807	9.34e-12	3.4186e-07	Very Late	CD8.EMRA.1																								GIMAP7	-0.743146	6.3921e-35	2.3396e-30	Late	CD4.CTL.GNLY
BATF	-0.607568	1.4956e-11	5.4743e-07	Very Late	CD8.EMRA.1																								LGALS1	0.818267	7.5883e-32	2.7775e-27	Late	CD4.CTL.GNLY
DUSP1	0.89889	1.666e-11	6.098e-07	Very Late	CD8.EMRA.1																								RUNX3	0.849106	4.1124e-29	1.5052e-24	Late	CD4.CTL.GNLY
PLEKHA2	0.631564	1.8752e-11	6.8635e-07	Very Late	CD8.EMRA.1																								PSMB9	-0.521503	6.8356e-28	2.502e-23	Late	CD4.CTL.GNLY
FOXO1	0.601669	2.5291e-11	9.257e-07	Very Late	CD8.EMRA.1																								FP236383.3	0.562432	1.5697e-27	5.7454e-23	Late	CD4.CTL.GNLY
SRRM2	0.342071	2.7721e-11	1.0146e-06	Very Late	CD8.EMRA.1																								HLA-DQA1	1.22387	4.0497e-25	1.4823e-20	Late	CD4.CTL.GNLY
DDX3X	0.433952	2.8204e-11	1.0323e-06	Very Late	CD8.EMRA.1																								CXCR4	1.2081	2.9762e-24	1.0894e-19	Late	CD4.CTL.GNLY
HLA-DQB1	1.0558	3.2328e-11	1.1833e-06	Very Late	CD8.EMRA.1																								RBFOX2	0.533182	7.4016e-23	2.7091e-18	Late	CD4.CTL.GNLY
SIT1	-0.501888	3.3372e-11	1.2215e-06	Very Late	CD8.EMRA.1																								PTPRCAP	-0.3389	9.9345e-21	3.6362e-16	Late	CD4.CTL.GNLY
FP236383.3	0.457526	4.0022e-11	1.4649e-06	Very Late	CD8.EMRA.1																								GIMAP5	-0.805287	1.0546e-20	3.8601e-16	Late	CD4.CTL.GNLY
DBF4	0.525085	4.9624e-11	1.8163e-06	Very Late	CD8.EMRA.1																								GIMAP4	-0.634283	2.7191e-20	9.9526e-16	Late	CD4.CTL.GNLY
PDE3B	0.404386	7.752e-11	2.8374e-06	Very Late	CD8.EMRA.1																								DUSP2	0.797981	9.3996e-20	3.4404e-15	Late	CD4.CTL.GNLY
ARID5A	0.914398	1.2785e-10	4.6794e-06	Very Late	CD8.EMRA.1																								PSME2	-0.423153	1.2275e-19	4.4929e-15	Late	CD4.CTL.GNLY
CDK2AP2	-0.445834	1.2857e-10	4.706e-06	Very Late	CD8.EMRA.1																								KLRB1	-0.968109	1.6318e-19	5.9729e-15	Late	CD4.CTL.GNLY
GNA13	0.52919	3.0307e-10	1.1093e-05	Very Late	CD8.EMRA.1																								ITM2A	-0.55284	1.6544e-18	6.0555e-14	Late	CD4.CTL.GNLY
THEMIS	-0.538381	3.0537e-10	1.1177e-05	Very Late	CD8.EMRA.1																								PDE3B	1.17652	2.8161e-18	1.0308e-13	Late	CD4.CTL.GNLY
CNOT6L	0.425143	3.3724e-10	1.2344e-05	Very Late	CD8.EMRA.1																								S100A6	0.382159	5.3616e-18	1.9625e-13	Late	CD4.CTL.GNLY
CDK17	0.417962	3.9513e-10	1.4462e-05	Very Late	CD8.EMRA.1																								PLAAT4	-0.354344	1.2607e-17	4.6146e-13	Late	CD4.CTL.GNLY
CDV3	0.32561	4.0395e-10	1.4785e-05	Very Late	CD8.EMRA.1																								EIF1	0.414214	1.4927e-17	5.4637e-13	Late	CD4.CTL.GNLY
CXCR4	0.706361	4.2556e-10	1.5576e-05	Very Late	CD8.EMRA.1																								PLP2	1.39744	2.7247e-17	9.9728e-13	Late	CD4.CTL.GNLY
DENND2D	-0.628541	5.1186e-10	1.8735e-05	Very Late	CD8.EMRA.1																								S100A8	-1.43916	3.2462e-17	1.1882e-12	Late	CD4.CTL.GNLY
SELL	-0.550035	5.4757e-10	2.0042e-05	Very Late	CD8.EMRA.1																								KLRG1	-0.516631	5.952e-16	2.1786e-11	Late	CD4.CTL.GNLY
RASA2	0.485543	1.4122e-09	5.169e-05	Very Late	CD8.EMRA.1																								SPOCK2	0.683918	1.7552e-15	6.4244e-11	Late	CD4.CTL.GNLY
MAPK1IP1L	0.524322	2.2363e-09	8.1852e-05	Very Late	CD8.EMRA.1																								FYB1	-0.488793	2.1179e-15	7.7521e-11	Late	CD4.CTL.GNLY
CYBC1	-0.388115	3.675e-09	0.00013451	Very Late	CD8.EMRA.1																								VAMP5	-0.592243	4.0195e-15	1.4712e-10	Late	CD4.CTL.GNLY
JUNB	0.448918	5.569e-09	0.00020384	Very Late	CD8.EMRA.1																								FLNA	0.384918	4.378e-15	1.6025e-10	Late	CD4.CTL.GNLY
LINC01578	0.419922	5.7157e-09	0.00020921	Very Late	CD8.EMRA.1																								PSMB10	-0.441493	5.7639e-15	2.1097e-10	Late	CD4.CTL.GNLY
PSMA5	-0.36846	6.4889e-09	0.00023751	Very Late	CD8.EMRA.1																								SYTL3	0.786668	1.0372e-14	3.7964e-10	Late	CD4.CTL.GNLY
RPS10	0.340872	6.7467e-09	0.00024694	Very Late	CD8.EMRA.1																								MYBL1	0.777469	1.2064e-14	4.4157e-10	Late	CD4.CTL.GNLY
SBDS	0.656003	1.1813e-08	0.00043239	Very Late	CD8.EMRA.1																								TXNIP	-0.331703	1.2287e-14	4.4971e-10	Late	CD4.CTL.GNLY
ZFP36	0.492132	1.4021e-08	0.0005132	Very Late	CD8.EMRA.1																								PSMB8	-0.377472	1.296e-14	4.7438e-10	Late	CD4.CTL.GNLY
RNMT	0.521929	2.1825e-08	0.00079885	Very Late	CD8.EMRA.1																								NFKBIA	0.830769	3.4839e-14	1.2752e-09	Late	CD4.CTL.GNLY
OSTC	-0.345942	2.2433e-08	0.0008211	Very Late	CD8.EMRA.1																								LINC00861	-0.704493	4.2863e-14	1.5689e-09	Late	CD4.CTL.GNLY
CCNH	0.342449	2.4033e-08	0.00087965	Very Late	CD8.EMRA.1																								COTL1	-0.42658	5.2237e-14	1.912e-09	Late	CD4.CTL.GNLY
WHAMM	0.511941	3.8049e-08	0.00139266	Very Late	CD8.EMRA.1																								PRF1	0.455939	9.7774e-14	3.5787e-09	Late	CD4.CTL.GNLY
FOSL2	0.833531	4.8787e-08	0.00178571	Very Late	CD8.EMRA.1																								VIM	0.509006	1.4776e-13	5.4083e-09	Late	CD4.CTL.GNLY
RGS19	-0.413195	5.4758e-08	0.00200424	Very Late	CD8.EMRA.1																								CX3CR1	-0.547623	1.6625e-13	6.0852e-09	Late	CD4.CTL.GNLY
ZC3HAV1	0.388943	5.75e-08	0.00210461	Very Late	CD8.EMRA.1																								PHACTR2	-0.480545	2.4329e-13	8.905e-09	Late	CD4.CTL.GNLY
REL	0.378414	5.9655e-08	0.0021835	Very Late	CD8.EMRA.1																								ATG2A	1.32207	3.4582e-13	1.2658e-08	Late	CD4.CTL.GNLY
DDX21	0.389426	6.5663e-08	0.00240341	Very Late	CD8.EMRA.1																								GBP5	-0.459869	4.4989e-13	1.6467e-08	Late	CD4.CTL.GNLY
HNRNPF	-0.352635	6.6417e-08	0.00243099	Very Late	CD8.EMRA.1																								SAMHD1	-0.402272	6.0396e-13	2.2106e-08	Late	CD4.CTL.GNLY
TIPARP	0.656	6.8724e-08	0.00251543	Very Late	CD8.EMRA.1																								IL7R	-0.439127	6.2336e-13	2.2816e-08	Late	CD4.CTL.GNLY
DNAJB6	0.427169	6.9594e-08	0.00254729	Very Late	CD8.EMRA.1																								LAIR2	0.809907	1.0662e-12	3.9025e-08	Late	CD4.CTL.GNLY
GIMAP1	-0.645868	1.2772e-07	0.00467464	Very Late	CD8.EMRA.1																								LIMS1	-0.731402	2.0107e-12	7.3597e-08	Late	CD4.CTL.GNLY
HIST1H1C	0.722634	1.3146e-07	0.00481179	Very Late	CD8.EMRA.1																								STAT1	-0.472749	3.4949e-12	1.2792e-07	Late	CD4.CTL.GNLY
HNRNPL	0.415863	1.3922e-07	0.00509566	Very Late	CD8.EMRA.1																								GLCCI1	-0.733202	4.4175e-12	1.6169e-07	Late	CD4.CTL.GNLY
ABI3	-0.387066	1.6023e-07	0.00586492	Very Late	CD8.EMRA.1																								LYZ	-1.12913	5.0218e-12	1.8381e-07	Late	CD4.CTL.GNLY
LINC00861	-0.480539	1.9672e-07	0.00720048	Very Late	CD8.EMRA.1																								GIMAP1	-0.781687	1.1979e-11	4.3846e-07	Late	CD4.CTL.GNLY
BHLHE40	0.50377	2.0218e-07	0.00740009	Very Late	CD8.EMRA.1																								CORO1B	-0.595261	1.4648e-11	5.3613e-07	Late	CD4.CTL.GNLY
CEBPZ	0.422299	2.0531e-07	0.00751467	Very Late	CD8.EMRA.1																								FKBP5	-0.938731	1.8401e-11	6.7352e-07	Late	CD4.CTL.GNLY
HIF1A	0.582022	2.0663e-07	0.00756319	Very Late	CD8.EMRA.1																								TNFAIP3	0.614711	2.0588e-11	7.5355e-07	Late	CD4.CTL.GNLY
TMBIM4	-0.327395	2.2655e-07	0.00829203	Very Late	CD8.EMRA.1																								ABRACL	-0.441624	3.1385e-11	1.1488e-06	Late	CD4.CTL.GNLY
TMEM35B	-0.584327	2.3208e-07	0.00849462	Very Late	CD8.EMRA.1																								SRRT	0.831842	3.1811e-11	1.1644e-06	Late	CD4.CTL.GNLY
SRRT	0.590145	2.6855e-07	0.00982935	Very Late	CD8.EMRA.1																								PZP	-0.945311	3.2714e-11	1.1974e-06	Late	CD4.CTL.GNLY
CLDND1	0.691157	2.9089e-07	0.0106472	Very Late	CD8.EMRA.1																								RASA2	0.59296	3.7769e-11	1.3824e-06	Late	CD4.CTL.GNLY
PRR5	-0.391485	2.9911e-07	0.0109479	Very Late	CD8.EMRA.1																								GBP4	-0.605263	4.9297e-11	1.8044e-06	Late	CD4.CTL.GNLY
SKAP1	-0.351848	3.0632e-07	0.0112118	Very Late	CD8.EMRA.1																								LBH	-0.51134	6.365e-11	2.3297e-06	Late	CD4.CTL.GNLY
ATP8A1	0.329016	3.1114e-07	0.0113884	Very Late	CD8.EMRA.1																								PDE4D	1.10464	7.1378e-11	2.6126e-06	Late	CD4.CTL.GNLY
CD74	0.360785	3.7804e-07	0.013837	Very Late	CD8.EMRA.1																								HNRNPF	-0.457782	1.005e-10	3.6784e-06	Late	CD4.CTL.GNLY
LAIR2	0.35384	3.8534e-07	0.0141041	Very Late	CD8.EMRA.1																								AC004687.1	0.644387	1.1919e-10	4.3624e-06	Late	CD4.CTL.GNLY
YPEL5	0.429379	5.0845e-07	0.0186104	Very Late	CD8.EMRA.1																								IFI30	-1.04733	1.2855e-10	4.7051e-06	Late	CD4.CTL.GNLY
UBE2J1	0.472393	5.9972e-07	0.021951	Very Late	CD8.EMRA.1																								MT-ND2	0.462237	1.5203e-10	5.5646e-06	Late	CD4.CTL.GNLY
HMGB2	0.426541	6.141e-07	0.0224772	Very Late	CD8.EMRA.1																								S100A9	-1.25649	4.0579e-10	1.4853e-05	Late	CD4.CTL.GNLY
BTN3A2	-0.437816	6.2244e-07	0.0227824	Very Late	CD8.EMRA.1																								CD69	0.68655	4.4145e-10	1.6158e-05	Late	CD4.CTL.GNLY
CBX4	0.589776	7.9055e-07	0.0289358	Very Late	CD8.EMRA.1																								AOAH	0.63436	4.9364e-10	1.8068e-05	Late	CD4.CTL.GNLY
FBXO33	0.395693	9.6808e-07	0.0354336	Very Late	CD8.EMRA.1																								GYPC	-0.369437	9.9708e-10	3.6495e-05	Late	CD4.CTL.GNLY
IFI35	-0.364432	1.0226e-06	0.0374306	Very Late	CD8.EMRA.1																								TIMP1	-0.750307	1.1367e-09	4.1607e-05	Late	CD4.CTL.GNLY
B4GALT1	0.508596	1.0687e-06	0.0391179	Very Late	CD8.EMRA.1																								NOSIP	-0.495605	1.1435e-09	4.1853e-05	Late	CD4.CTL.GNLY
SNHG5	-0.378393	1.2936e-06	0.0473497	Very Late	CD8.EMRA.1																								DYNLL1	-0.570801	1.1986e-09	4.3871e-05	Late	CD4.CTL.GNLY
GNLY	-1.81775	3.762e-144	1.377e-139	Very Late	CD8.EMRA.2																								C1orf162	-0.909798	1.3824e-09	5.06e-05	Late	CD4.CTL.GNLY
AC004448.2	1.6495	1.1733e-79	4.2944e-75	Very Late	CD8.EMRA.2																								CARD16	-0.452995	1.4951e-09	5.4723e-05	Late	CD4.CTL.GNLY
TKTL1	5.70291	2.177e-69	7.9682e-65	Very Late	CD8.EMRA.2																								PIM1	-0.532801	1.5818e-09	5.7897e-05	Late	CD4.CTL.GNLY
CMC1	1.10741	4.8113e-48	1.761e-43	Very Late	CD8.EMRA.2																								BHLHE40	0.615444	1.8161e-09	6.6473e-05	Late	CD4.CTL.GNLY
IFITM2	-0.609289	2.4203e-43	8.8588e-39	Very Late	CD8.EMRA.2																								DNAJB6	0.646303	2.3951e-09	8.7664e-05	Late	CD4.CTL.GNLY
FGFBP2	-0.665527	3.2907e-41	1.2044e-36	Very Late	CD8.EMRA.2																								RHOH	0.527862	2.9169e-09	0.00010676	Late	CD4.CTL.GNLY
DUSP2	1.25678	2.0783e-40	7.6069e-36	Very Late	CD8.EMRA.2																								RPTOR	0.922948	3.3254e-09	0.00012172	Late	CD4.CTL.GNLY
KLRB1	1.68471	6.9515e-38	2.5444e-33	Very Late	CD8.EMRA.2																								CWC15	0.615433	4.0276e-09	0.00014742	Late	CD4.CTL.GNLY
PRF1	-0.435723	1.8479e-36	6.7637e-32	Very Late	CD8.EMRA.2																								RNASET2	-0.422287	4.1015e-09	0.00015012	Late	CD4.CTL.GNLY
SELL	-1.73745	2.8351e-32	1.0377e-27	Very Late	CD8.EMRA.2																								ADGRG1	0.685935	7.0244e-09	0.00025711	Late	CD4.CTL.GNLY
ITGB1	-0.713973	1.3482e-31	4.9348e-27	Very Late	CD8.EMRA.2																								BTG2	0.900061	9.1752e-09	0.00033583	Late	CD4.CTL.GNLY
ASCL2	-1.4152	2.4586e-30	8.9991e-26	Very Late	CD8.EMRA.2																								SERP1	-0.396811	1.0403e-08	0.00038077	Late	CD4.CTL.GNLY
ZNF683	-0.818039	6.2024e-29	2.2702e-24	Very Late	CD8.EMRA.2																								ARL4C	0.32669	1.2279e-08	0.00044945	Late	CD4.CTL.GNLY
KIR2DL3	-1.85671	1.0431e-27	3.8181e-23	Very Late	CD8.EMRA.2																								WHAMM	0.813099	1.2807e-08	0.00046875	Late	CD4.CTL.GNLY
DNAJB1	1.34851	1.4795e-27	5.4153e-23	Very Late	CD8.EMRA.2																								MYLIP	0.822046	1.3555e-08	0.00049613	Late	CD4.CTL.GNLY
IFITM1	-0.33527	1.2488e-25	4.5707e-21	Very Late	CD8.EMRA.2																								NCBP2AS2	0.605105	1.5083e-08	0.00055207	Late	CD4.CTL.GNLY
RPS29	0.590906	2.0416e-24	7.4728e-20	Very Late	CD8.EMRA.2																								PLEKHF1	-0.765981	1.6201e-08	0.00059299	Late	CD4.CTL.GNLY
CTSW	-0.399846	4.7433e-24	1.7361e-19	Very Late	CD8.EMRA.2																								ISCA1	0.764711	1.6327e-08	0.00059759	Late	CD4.CTL.GNLY
TRDV1	-2.23064	1.0124e-23	3.7056e-19	Very Late	CD8.EMRA.2																								MAD1L1	-0.405117	1.7101e-08	0.00062593	Late	CD4.CTL.GNLY
ZFP36	0.742252	4.6163e-22	1.6896e-17	Very Late	CD8.EMRA.2																								PSME4	0.824799	2.0774e-08	0.00076035	Late	CD4.CTL.GNLY
CXCR4	1.52567	1.4806e-21	5.4192e-17	Very Late	CD8.EMRA.2																								TNFSF10	-0.816948	2.1665e-08	0.00079299	Late	CD4.CTL.GNLY
TIGIT	0.394943	7.8236e-21	2.8636e-16	Very Late	CD8.EMRA.2																								MT-ND3	0.511323	2.4459e-08	0.00089524	Late	CD4.CTL.GNLY
PRSS23	-0.514121	1.4399e-20	5.2702e-16	Very Late	CD8.EMRA.2																								CTSW	0.380158	3.7773e-08	0.00138257	Late	CD4.CTL.GNLY
RPL28	0.338525	7.3354e-20	2.6849e-15	Very Late	CD8.EMRA.2																								RESF1	-0.367363	4.1305e-08	0.00151185	Late	CD4.CTL.GNLY
RPS27	0.414967	9.8438e-20	3.603e-15	Very Late	CD8.EMRA.2																								TCF25	0.435024	4.1546e-08	0.00152067	Late	CD4.CTL.GNLY
EIF1	0.442526	3.5668e-19	1.3055e-14	Very Late	CD8.EMRA.2																								CD44	0.433745	4.2549e-08	0.00155737	Late	CD4.CTL.GNLY
RPL39	0.335723	1.9821e-17	7.2551e-13	Very Late	CD8.EMRA.2																								PYCARD	-0.493243	4.365e-08	0.00159767	Late	CD4.CTL.GNLY
JUNB	1.05158	2.3424e-17	8.5738e-13	Very Late	CD8.EMRA.2																								HIST1H1E	0.497165	4.4796e-08	0.00163961	Late	CD4.CTL.GNLY
CD320	-0.774717	1.1789e-16	4.315e-12	Very Late	CD8.EMRA.2																								NFKBIA	0.870303	3.0983e-31	1.134e-26	Late	CD4.NaiveLike
DUSP1	1.37392	1.1988e-16	4.3879e-12	Very Late	CD8.EMRA.2																								LTB	0.342423	3.8426e-20	1.4065e-15	Late	CD4.NaiveLike
LINC02446	-0.617844	1.9178e-16	7.0196e-12	Very Late	CD8.EMRA.2																								CXCR3	-0.898477	3.3793e-18	1.2369e-13	Late	CD4.NaiveLike
FP671120.4	0.702615	2.2833e-16	8.3573e-12	Very Late	CD8.EMRA.2																								RPS26	0.478498	4.2346e-15	1.55e-10	Late	CD4.NaiveLike
GZMB	-0.33993	1.571e-15	5.7503e-11	Very Late	CD8.EMRA.2																								MT-ND3	0.540794	4.3883e-15	1.6062e-10	Late	CD4.NaiveLike
GIMAP7	-0.585668	2.3401e-15	8.5654e-11	Very Late	CD8.EMRA.2																								MAL	0.43053	5.3871e-15	1.9718e-10	Late	CD4.NaiveLike
CD69	0.870196	2.9942e-15	1.0959e-10	Very Late	CD8.EMRA.2																								GZMM	-0.457946	1.279e-13	4.6816e-09	Late	CD4.NaiveLike
TNFAIP3	0.846714	5.0667e-15	1.8545e-10	Very Late	CD8.EMRA.2																								RPS29	0.386202	7.8363e-13	2.8682e-08	Late	CD4.NaiveLike
CD8B	0.477347	1.0129e-14	3.7074e-10	Very Late	CD8.EMRA.2																								GIMAP7	-0.480772	1.1931e-12	4.3668e-08	Late	CD4.NaiveLike
ALOX5AP	1.26367	5.0361e-14	1.8433e-09	Very Late	CD8.EMRA.2																								RPL41	0.34862	2.9001e-12	1.0615e-07	Late	CD4.NaiveLike
SYTL3	0.617163	2.2909e-13	8.3852e-09	Very Late	CD8.EMRA.2																								PLAAT4	-0.38826	5.8174e-12	2.1293e-07	Late	CD4.NaiveLike
FYN	0.394357	3.4797e-13	1.2736e-08	Very Late	CD8.EMRA.2																								TNFRSF4	0.665641	2.1555e-11	7.8896e-07	Late	CD4.NaiveLike
JUN	2.1441	3.8985e-13	1.4269e-08	Very Late	CD8.EMRA.2																								GBP5	-0.500858	7.8441e-11	2.8711e-06	Late	CD4.NaiveLike
GIMAP4	-0.737887	5.4753e-13	2.0041e-08	Very Late	CD8.EMRA.2																								STK17A	-0.371561	7.9105e-11	2.8954e-06	Late	CD4.NaiveLike
GZMK	0.612517	1.2102e-12	4.4296e-08	Very Late	CD8.EMRA.2																								IL7R	-0.357693	1.3098e-10	4.7942e-06	Late	CD4.NaiveLike
JUND	0.621784	1.6098e-12	5.8923e-08	Very Late	CD8.EMRA.2																								CST7	-0.703509	2.0138e-10	7.3711e-06	Late	CD4.NaiveLike
PIK3R1	0.585414	1.7682e-12	6.4721e-08	Very Late	CD8.EMRA.2																								GIMAP4	-0.512275	2.9041e-10	1.063e-05	Late	CD4.NaiveLike
RPS21	0.372997	1.8052e-12	6.6072e-08	Very Late	CD8.EMRA.2																								FYB1	-0.340488	3.0234e-10	1.1066e-05	Late	CD4.NaiveLike
RPL38	0.372946	4.7384e-12	1.7343e-07	Very Late	CD8.EMRA.2																								GZMK	-0.676039	6.639e-10	2.43e-05	Late	CD4.NaiveLike
PDCD4	0.372075	5.1655e-12	1.8907e-07	Very Late	CD8.EMRA.2																								RESF1	-0.466186	2.8036e-09	0.00010262	Late	CD4.NaiveLike
XBP1	-0.565042	6.7103e-12	2.4561e-07	Very Late	CD8.EMRA.2																								AC004448.2	0.34753	3.0561e-09	0.00011186	Late	CD4.NaiveLike
PSMB10	-0.441172	1.0851e-11	3.9716e-07	Very Late	CD8.EMRA.2																								CRIP2	0.753194	3.6418e-09	0.0001333	Late	CD4.NaiveLike
CCL3	1.56833	1.7232e-11	6.3072e-07	Very Late	CD8.EMRA.2																								LYAR	-0.594007	5.5818e-09	0.00020431	Late	CD4.NaiveLike
CD2	-0.649028	2.1995e-11	8.0508e-07	Very Late	CD8.EMRA.2																								GATA3	0.447421	5.815e-09	0.00021284	Late	CD4.NaiveLike
S100A11	-0.455948	3.2047e-11	1.173e-06	Very Late	CD8.EMRA.2																								AC243960.1	-0.475196	6.7627e-09	0.00024753	Late	CD4.NaiveLike
STAT1	-0.6736	3.2063e-11	1.1736e-06	Very Late	CD8.EMRA.2																								CST3	-0.944133	1.1905e-08	0.00043576	Late	CD4.NaiveLike
KLRC2	0.405628	3.4474e-11	1.2618e-06	Very Late	CD8.EMRA.2																								GIMAP5	-0.486084	1.88e-08	0.00068811	Late	CD4.NaiveLike
SELPLG	-0.552366	4.4946e-11	1.6451e-06	Very Late	CD8.EMRA.2																								STOM	-0.61722	2.1083e-08	0.00077168	Late	CD4.NaiveLike
CEMIP2	0.873487	6.5471e-11	2.3964e-06	Very Late	CD8.EMRA.2																								NOSIP	-0.338278	2.6458e-08	0.00096841	Late	CD4.NaiveLike
RBM39	0.343397	7.5679e-11	2.77e-06	Very Late	CD8.EMRA.2																								CCL5	-0.821614	3.4404e-08	0.00125927	Late	CD4.NaiveLike
ANXA1	-0.486917	9.2849e-11	3.3985e-06	Very Late	CD8.EMRA.2																								CEBPB	-0.452196	3.8619e-08	0.00141354	Late	CD4.NaiveLike
PSMB9	-0.358578	1.0734e-10	3.9287e-06	Very Late	CD8.EMRA.2																								BHLHE40	0.5873	4.5672e-08	0.00167168	Late	CD4.NaiveLike
UCP2	-0.498337	2.0407e-10	7.4693e-06	Very Late	CD8.EMRA.2																								MX1	1.16181	9.2724e-08	0.00339389	Late	CD4.NaiveLike
KIR3DL1	-2.13969	2.1321e-10	7.8041e-06	Very Late	CD8.EMRA.2																								GLIPR1	-0.439019	9.5527e-08	0.00349648	Late	CD4.NaiveLike
ITM2A	0.708484	4.2329e-10	1.5493e-05	Very Late	CD8.EMRA.2																								LINC01871	-0.339091	1.0491e-07	0.00383989	Late	CD4.NaiveLike
TPST2	-0.364407	8.0059e-10	2.9303e-05	Very Late	CD8.EMRA.2																								GZMA	-0.38411	1.0956e-07	0.00400996	Late	CD4.NaiveLike
TSPAN32	-0.765343	8.9803e-10	3.287e-05	Very Late	CD8.EMRA.2																								IL16	-0.427683	1.4565e-07	0.00533124	Late	CD4.NaiveLike
PRR5	-0.70809	1.0121e-09	3.7044e-05	Very Late	CD8.EMRA.2																								PIM3	0.623523	1.5534e-07	0.00568559	Late	CD4.NaiveLike
PECAM1	0.662154	2.0902e-09	7.6505e-05	Very Late	CD8.EMRA.2																								CTSH	0.679151	1.6623e-07	0.00608434	Late	CD4.NaiveLike
TENT5C	1.20617	3.0992e-09	0.00011344	Very Late	CD8.EMRA.2																								LINC00861	-0.52254	2.4018e-07	0.00879094	Late	CD4.NaiveLike
SPOCK2	0.356242	3.587e-09	0.00013129	Very Late	CD8.EMRA.2																								FRY	0.435856	2.6124e-07	0.00956176	Late	CD4.NaiveLike
MRPS6	-0.660095	4.6417e-09	0.0001699	Very Late	CD8.EMRA.2																								TUBA4A	-0.362834	3.1509e-07	0.0115327	Late	CD4.NaiveLike
SIT1	1.01559	6.4798e-09	0.00023717	Very Late	CD8.EMRA.2																								RUNX2	0.897806	3.456e-07	0.0126497	Late	CD4.NaiveLike
SFPQ	0.51905	7.1948e-09	0.00026334	Very Late	CD8.EMRA.2																								S100A9	-0.698392	3.7997e-07	0.0139078	Late	CD4.NaiveLike
YES1	0.696188	9.4816e-09	0.00034704	Very Late	CD8.EMRA.2																								PRNP	0.562319	5.6437e-07	0.020657	Late	CD4.NaiveLike
CX3CR1	-0.522978	9.6608e-09	0.0003536	Very Late	CD8.EMRA.2																								RPS10	-0.404496	7.9435e-07	0.029075	Late	CD4.NaiveLike
PPP1R16B	0.811454	1.6628e-08	0.00060861	Very Late	CD8.EMRA.2																								ZFP36L1	0.336252	8.1949e-07	0.0299951	Late	CD4.NaiveLike
ZFP36L2	0.524184	1.9739e-08	0.00072248	Very Late	CD8.EMRA.2																								ACAA2	-0.571473	9.2423e-07	0.0338286	Late	CD4.NaiveLike
TSC22D3	0.357291	3.81e-08	0.00139454	Very Late	CD8.EMRA.2																								PSMB9	-0.336835	1.0047e-06	0.0367728	Late	CD4.NaiveLike
RNF125	0.615105	3.8571e-08	0.00141179	Very Late	CD8.EMRA.2																								CYLD	0.365395	1.0131e-06	0.0370829	Late	CD4.NaiveLike
TRA2B	0.59469	8.061e-08	0.00295047	Very Late	CD8.EMRA.2																								RBPJ	-0.491855	1.0493e-06	0.038405	Late	CD4.NaiveLike
FP236383.3	0.500829	9.3977e-08	0.00343974	Very Late	CD8.EMRA.2																								FTH1	-0.472747	7.173e-27	2.6255e-22	Late	CD8.CM
DDIT4	0.521203	1.1635e-07	0.00425853	Very Late	CD8.EMRA.2																								AC004448.2	1.3597	2.3402e-21	8.5657e-17	Late	CD8.CM
KLRC4	-0.76182	1.775e-07	0.00649685	Very Late	CD8.EMRA.2																								MT-ATP8	0.399586	1.4681e-20	5.3734e-16	Late	CD8.CM
MZT2A	0.496943	2.6733e-07	0.00978496	Very Late	CD8.EMRA.2																								S100A8	-0.850736	1.6924e-17	6.1944e-13	Late	CD8.CM
NFKBIA	0.601671	3.5609e-07	0.0130338	Very Late	CD8.EMRA.2																								LYZ	-1.0151	1.5804e-14	5.7845e-10	Late	CD8.CM
PSMA7	-0.354381	4.2258e-07	0.0154674	Very Late	CD8.EMRA.2																								MT-ND3	0.398099	3.7218e-14	1.3623e-09	Late	CD8.CM
LAIR2	0.46066	4.8187e-07	0.0176375	Very Late	CD8.EMRA.2																								SRGN	-0.341939	5.4173e-11	1.9829e-06	Late	CD8.CM
PTP4A2	0.378459	6.1505e-07	0.022512	Very Late	CD8.EMRA.2																								ANK3	0.762111	1.5503e-10	5.6745e-06	Late	CD8.CM
SRRM1	0.371225	7.2565e-07	0.0265604	Very Late	CD8.EMRA.2																								ZBP1	0.937312	2.142e-10	7.8401e-06	Late	CD8.CM
STK17B	0.469445	9.5759e-07	0.0350498	Very Late	CD8.EMRA.2																								MT-ATP6	0.417194	3.0104e-10	1.1019e-05	Late	CD8.CM
HIST1H1E	0.625501	9.7004e-07	0.0355054	Very Late	CD8.EMRA.2																								PPP6R2	0.706181	3.708e-10	1.3572e-05	Late	CD8.CM
JUND	0.644189	1.0053e-22	3.6796e-18	Very Late	CD8.NaiveLike																								MT2A	-0.82699	8.807e-10	3.2235e-05	Late	CD8.CM
RPS4Y1	0.635609	2.9772e-19	1.0897e-14	Very Late	CD8.NaiveLike																								FLNA	0.529194	1.8844e-09	6.8972e-05	Late	CD8.CM
TNFAIP3	0.451148	4.011e-19	1.4681e-14	Very Late	CD8.NaiveLike																								KLRD1	-0.587183	3.9426e-09	0.00014431	Late	CD8.CM
GIMAP7	-0.887908	5.3129e-18	1.9446e-13	Very Late	CD8.NaiveLike																								FP236383.3	0.40981	5.2642e-09	0.00019268	Late	CD8.CM
HLA-C	-0.466689	1.8475e-15	6.7622e-11	Very Late	CD8.NaiveLike																								PRKCB	0.416326	2.8416e-08	0.00104009	Late	CD8.CM
TMSB4X	-0.386344	6.4298e-15	2.3534e-10	Very Late	CD8.NaiveLike																								AC004687.1	0.545415	5.0658e-08	0.00185418	Late	CD8.CM
IFITM3	-1.80176	1.8802e-13	6.882e-09	Very Late	CD8.NaiveLike																								PAM	0.819976	5.6047e-08	0.00205144	Late	CD8.CM
JUN	0.488072	2.0987e-13	7.6818e-09	Very Late	CD8.NaiveLike																								STK17A	-0.341068	1.0233e-06	0.0374536	Late	CD8.CM
ZFP36L2	0.771141	2.1558e-13	7.8905e-09	Very Late	CD8.NaiveLike																								RPS26	0.351518	3.2472e-59	1.1885e-54	Late	CD8.EM
GIMAP5	-0.836571	5.5638e-13	2.0365e-08	Very Late	CD8.NaiveLike																								KLRD1	-0.781084	2.7761e-52	1.0161e-47	Late	CD8.EM
STAT1	-1.48222	2.5901e-12	9.4802e-08	Very Late	CD8.NaiveLike																								AC004448.2	1.01877	1.4415e-45	5.2761e-41	Late	CD8.EM
LINC02446	-0.592521	4.5888e-11	1.6796e-06	Very Late	CD8.NaiveLike																								JUN	0.87264	5.1375e-31	1.8804e-26	Late	CD8.EM
DUSP1	0.5788	2.9762e-10	1.0894e-05	Very Late	CD8.NaiveLike																								S100A8	-0.919472	5.5266e-31	2.0228e-26	Late	CD8.EM
NFKBIA	1.21582	3.1e-10	1.1347e-05	Very Late	CD8.NaiveLike																								LYZ	-1.03145	1.794e-30	6.5665e-26	Late	CD8.EM
IFITM1	-0.359518	5.3022e-10	1.9407e-05	Very Late	CD8.NaiveLike																								CD27	0.613888	2.5539e-25	9.3477e-21	Late	CD8.EM
NUCB2	-0.848159	1.1182e-09	4.0929e-05	Very Late	CD8.NaiveLike																								S100A9	-1.02462	5.2921e-23	1.937e-18	Late	CD8.EM
GATA3	0.666347	4.6204e-09	0.00016912	Very Late	CD8.NaiveLike																								LINC02446	-0.567329	9.9226e-23	3.6319e-18	Late	CD8.EM
YPEL5	0.593741	9.5999e-09	0.00035138	Very Late	CD8.NaiveLike																								KLF6	0.444292	1.2158e-22	4.4499e-18	Late	CD8.EM
PLAAT4	-0.545553	1.2969e-08	0.0004747	Very Late	CD8.NaiveLike																								GNLY	0.660273	8.0588e-22	2.9497e-17	Late	CD8.EM
TUBB	-0.511339	1.3463e-08	0.00049276	Very Late	CD8.NaiveLike																								EFHD2	-0.345369	4.0905e-20	1.4972e-15	Late	CD8.EM
RAC2	-0.340631	2.161e-08	0.00079096	Very Late	CD8.NaiveLike																								NFKBIA	0.566393	5.8782e-18	2.1515e-13	Late	CD8.EM
GBP5	-1.73582	2.6631e-08	0.00097474	Very Late	CD8.NaiveLike																								DUSP2	0.353663	8.3476e-18	3.0554e-13	Late	CD8.EM
UBE2L6	-0.747686	3.2881e-08	0.00120352	Very Late	CD8.NaiveLike																								HIST1H4C	0.690751	8.5202e-17	3.1186e-12	Late	CD8.EM
JUNB	0.441698	4.567e-08	0.00167161	Very Late	CD8.NaiveLike																								KLRG1	-0.388774	8.7242e-17	3.1932e-12	Late	CD8.EM
S1PR4	-0.744586	4.6618e-08	0.0017063	Very Late	CD8.NaiveLike																								FCRL6	-0.531687	9.6785e-17	3.5425e-12	Late	CD8.EM
HSPA8	-0.445639	6.187e-08	0.00226457	Very Late	CD8.NaiveLike																								PHACTR2	-0.322646	7.337e-16	2.6855e-11	Late	CD8.EM
GBP4	-1.62792	6.3154e-08	0.00231155	Very Late	CD8.NaiveLike																								MT-ND3	0.395123	8.5548e-16	3.1312e-11	Late	CD8.EM
NR4A2	1.30116	6.6394e-08	0.00243014	Very Late	CD8.NaiveLike																								GIMAP1	-0.501345	7.8984e-15	2.891e-10	Late	CD8.EM
AC004448.2	0.444227	7.5868e-08	0.00277691	Very Late	CD8.NaiveLike																								GZMB	0.379406	2.9067e-14	1.0639e-09	Late	CD8.EM
SF1	0.424106	8.9054e-08	0.00325956	Very Late	CD8.NaiveLike																								PPP6R2	0.560554	4.1738e-14	1.5277e-09	Late	CD8.EM
GIMAP4	-0.95331	9.4222e-08	0.00344872	Very Late	CD8.NaiveLike																								PMAIP1	0.713534	3.0131e-13	1.1028e-08	Late	CD8.EM
TENT5C	0.689893	1.2346e-07	0.00451877	Very Late	CD8.NaiveLike																								GIMAP5	-0.389568	1.4177e-12	5.1889e-08	Late	CD8.EM
CISH	-1.34262	1.3082e-07	0.00478818	Very Late	CD8.NaiveLike																								FP236383.3	0.381412	2.1715e-12	7.948e-08	Late	CD8.EM
GIMAP1	-0.852832	1.3197e-07	0.00483047	Very Late	CD8.NaiveLike																								GIMAP7	-0.345619	1.3543e-11	4.9571e-07	Late	CD8.EM
ZBTB1	0.633095	1.4508e-07	0.00531018	Very Late	CD8.NaiveLike																								SBDS	0.439564	2.6619e-11	9.7431e-07	Late	CD8.EM
ZFP36	0.559147	2.9474e-07	0.0107879	Very Late	CD8.NaiveLike																								HIST1H1C	0.505228	7.8628e-11	2.8779e-06	Late	CD8.EM
S100A11	-0.569075	3.3456e-07	0.0122457	Very Late	CD8.NaiveLike																								PAM	0.523731	2.2774e-10	8.3359e-06	Late	CD8.EM
GYPC	-0.368303	3.3601e-07	0.0122988	Very Late	CD8.NaiveLike																								RELB	0.633285	2.2979e-10	8.4109e-06	Late	CD8.EM
CSRNP1	1.00381	3.5099e-07	0.0128471	Very Late	CD8.NaiveLike																								SLC2A3	0.421038	5.6582e-10	2.071e-05	Late	CD8.EM
BTG2	0.484951	3.8055e-07	0.0139289	Very Late	CD8.NaiveLike																								RBFOX2	0.437167	7.8329e-10	2.867e-05	Late	CD8.EM
IL16	-0.489786	1.2664e-06	0.0463531	Very Late	CD8.NaiveLike																								BHLHE40	0.41681	1.8668e-09	6.833e-05	Late	CD8.EM
IFITM2	-0.605601	1.3137e-06	0.0480825	Very Late	CD8.NaiveLike																								INPP4B	-0.338298	2.0344e-09	7.4461e-05	Late	CD8.EM
PSME1	-0.354208	1.3198e-06	0.0483075	Very Late	CD8.NaiveLike																								FUT8	0.567061	2.0516e-09	7.5092e-05	Late	CD8.EM
HLA-C	-0.646641	5.6741e-73	2.0768e-68	Very Late	CD8.TEX																								ARHGEF3	-0.4101	2.2974e-09	8.4088e-05	Late	CD8.EM
TMSB4X	-0.525046	1.3143e-62	4.8105e-58	Very Late	CD8.TEX																								MT2A	-0.352371	6.3437e-09	0.00023219	Late	CD8.EM
RPS29	0.823528	1.7062e-61	6.2451e-57	Very Late	CD8.TEX																								IL7R	-0.37358	1.4205e-08	0.00051992	Late	CD8.EM
HLA-DQB1	2.14981	1.2553e-48	4.5948e-44	Very Late	CD8.TEX																								MT1F	-0.373299	1.5944e-08	0.0005836	Late	CD8.EM
S100A4	-0.53324	2.3046e-38	8.4354e-34	Very Late	CD8.TEX																								DUSP1	0.400243	1.6348e-08	0.00059836	Late	CD8.EM
TNFAIP3	2.40185	4.1068e-37	1.5032e-32	Very Late	CD8.TEX																								HIVEP3	-0.398676	2.0114e-08	0.00073623	Late	CD8.EM
JUN	3.73412	5.0064e-36	1.8324e-31	Very Late	CD8.TEX																								AOAH	-0.372885	2.0571e-08	0.00075294	Late	CD8.EM
CFL1	-0.480015	5.6683e-36	2.0747e-31	Very Late	CD8.TEX																								PSME4	0.349046	3.4442e-08	0.00126065	Late	CD8.EM
TNF	5.53161	5.0312e-35	1.8415e-30	Very Late	CD8.TEX																								ATG2A	0.473919	8.2077e-08	0.00300418	Late	CD8.EM
RPL39	0.477601	6.8937e-35	2.5232e-30	Very Late	CD8.TEX																								DPYD	-0.361918	8.2418e-08	0.00301665	Late	CD8.EM
PFN1	-0.418263	1.7532e-33	6.4171e-29	Very Late	CD8.TEX																								LINC00861	-0.332639	9.8922e-08	0.00362074	Late	CD8.EM
NFKBIZ	3.32793	2.9755e-33	1.0891e-28	Very Late	CD8.TEX																								MYBL1	-0.439162	1.1472e-07	0.00419885	Late	CD8.EM
S100A6	-0.479556	3.6266e-30	1.3274e-25	Very Late	CD8.TEX																								NFKBIB	0.380882	1.3225e-07	0.0048406	Late	CD8.EM
RPL37	0.35876	7.8246e-28	2.8639e-23	Very Late	CD8.TEX																								PLCL2	-0.395098	1.6617e-07	0.00608228	Late	CD8.EM
PMAIP1	3.70819	9.7592e-28	3.5721e-23	Very Late	CD8.TEX																								DYNLL1	-0.363157	1.7148e-07	0.00627654	Late	CD8.EM
CTSW	-0.632937	5.7469e-27	2.1035e-22	Very Late	CD8.TEX																								STK39	-0.33527	2.0753e-07	0.00759596	Late	CD8.EM
IFITM1	-0.370321	1.4509e-26	5.3106e-22	Very Late	CD8.TEX																								TNFAIP8	-0.347398	2.9534e-07	0.0108101	Late	CD8.EM
CD74	1.08021	9.5163e-26	3.4832e-21	Very Late	CD8.TEX																								WHAMM	0.371295	3.1417e-07	0.0114991	Late	CD8.EM
PRF1	-0.778785	9.6119e-24	3.5182e-19	Very Late	CD8.TEX																								SRRT	0.363058	3.1711e-07	0.0116067	Late	CD8.EM
ACTB	-0.420409	3.0412e-23	1.1132e-18	Very Late	CD8.TEX																								GLIPR1	-0.347086	3.6379e-07	0.0133154	Late	CD8.EM
HCST	-0.446144	3.1198e-23	1.1419e-18	Very Late	CD8.TEX																								SOS1	-0.335714	5.0462e-07	0.01847	Late	CD8.EM
MYL12A	-0.427271	2.4612e-22	9.0086e-18	Very Late	CD8.TEX																								SNTB1	-0.478032	6.7842e-07	0.0248316	Late	CD8.EM
IFITM2	-0.483428	2.7967e-22	1.0237e-17	Very Late	CD8.TEX																								NFKBIZ	0.394101	7.9267e-07	0.0290132	Late	CD8.EM
ACTG1	-0.443409	3.7097e-22	1.3578e-17	Very Late	CD8.TEX																								PIM1	-0.351586	9.9387e-07	0.0363775	Late	CD8.EM
IFNG	3.03146	3.0649e-21	1.1218e-16	Very Late	CD8.TEX																								H1FX	0.322514	1.0513e-06	0.0384793	Late	CD8.EM
RPS27	0.324448	4.1067e-21	1.5031e-16	Very Late	CD8.TEX																								GNLY	1.13547	1.468e-123	5.374e-119	Late	CD8.EMRA.1
BHLHE40	1.36038	5.0978e-20	1.8659e-15	Very Late	CD8.TEX																								RPS26	0.526106	2.755e-108	1.008e-103	Late	CD8.EMRA.1
MYL12B	-0.433946	3.3231e-19	1.2163e-14	Very Late	CD8.TEX																								GZMB	0.488503	4.1014e-79	1.5012e-74	Late	CD8.EMRA.1
ANXA2	-0.852599	6.0047e-19	2.1978e-14	Very Late	CD8.TEX																								KLRD1	-0.554299	8.9864e-59	3.2892e-54	Late	CD8.EMRA.1
H3F3B	0.930685	6.6574e-19	2.4367e-14	Very Late	CD8.TEX																								NFKBIA	1.03967	1.3729e-58	5.025e-54	Late	CD8.EMRA.1
CDK2AP2	-1.17196	1.8374e-18	6.7252e-14	Very Late	CD8.TEX																								CD27	1.25306	1.9282e-55	7.0577e-51	Late	CD8.EMRA.1
RASA2	1.18639	2.5786e-18	9.4382e-14	Very Late	CD8.TEX																								DUSP2	0.714549	2.5456e-49	9.3175e-45	Late	CD8.EMRA.1
VIM	-0.52205	3.0359e-18	1.1112e-13	Very Late	CD8.TEX																								LYZ	-1.29498	2.586e-46	9.4653e-42	Late	CD8.EMRA.1
EIF1	0.792028	4.2247e-18	1.5463e-13	Very Late	CD8.TEX																								JUN	1.22863	7.8373e-46	2.8686e-41	Late	CD8.EMRA.1
FP236383.3	0.765797	1.0649e-17	3.8977e-13	Very Late	CD8.TEX																								LINC02446	-0.724237	4.7558e-45	1.7407e-40	Late	CD8.EMRA.1
PIM3	2.10948	1.0995e-17	4.0242e-13	Very Late	CD8.TEX																								FCRL6	-0.673594	2.6577e-44	9.7276e-40	Late	CD8.EMRA.1
BTG2	1.96278	1.1333e-17	4.1482e-13	Very Late	CD8.TEX																								LGALS1	0.390432	8.2153e-41	3.007e-36	Late	CD8.EMRA.1
RNF19A	1.42379	1.2225e-17	4.4747e-13	Very Late	CD8.TEX																								S100A8	-1.21174	2.8984e-36	1.0609e-31	Late	CD8.EMRA.1
GZMM	-0.521511	1.2782e-17	4.6786e-13	Very Late	CD8.TEX																								S100A9	-1.2318	1.0762e-32	3.9392e-28	Late	CD8.EMRA.1
GZMH	-0.460722	2.1234e-17	7.772e-13	Very Late	CD8.TEX																								PSMB9	-0.337716	4.1083e-32	1.5037e-27	Late	CD8.EMRA.1
RBM39	0.781319	2.5487e-17	9.3286e-13	Very Late	CD8.TEX																								EIF1	0.365809	9.9892e-31	3.6562e-26	Late	CD8.EMRA.1
OTULIN	2.22191	3.1802e-17	1.164e-12	Very Late	CD8.TEX																								GIMAP7	-0.393604	1.2354e-28	4.5217e-24	Late	CD8.EMRA.1
KLF6	1.07794	4.9508e-17	1.8121e-12	Very Late	CD8.TEX																								FYB1	-0.334716	1.0115e-26	3.7023e-22	Late	CD8.EMRA.1
CD69	1.48299	9.804e-17	3.5885e-12	Very Late	CD8.TEX																								ATG2A	0.905337	1.9119e-24	6.9979e-20	Late	CD8.EMRA.1
SLC9A3R1	-0.502811	3.5981e-16	1.317e-11	Very Late	CD8.TEX																								JUNB	0.471849	7.9008e-24	2.8918e-19	Late	CD8.EMRA.1
ATG2A	2.26547	4.1049e-16	1.5025e-11	Very Late	CD8.TEX																								BHLHE40	0.601967	1.6633e-23	6.0881e-19	Late	CD8.EMRA.1
DUSP5	2.71049	4.737e-16	1.7338e-11	Very Late	CD8.TEX																								RBM38	0.588724	1.8917e-23	6.9241e-19	Late	CD8.EMRA.1
CCND3	-0.777066	5.5983e-16	2.0491e-11	Very Late	CD8.TEX																								ARHGEF3	-0.510051	6.4709e-23	2.3685e-18	Late	CD8.EMRA.1
SLC2A3	1.77765	9.8547e-16	3.607e-11	Very Late	CD8.TEX																								GIMAP5	-0.463699	7.5659e-23	2.7693e-18	Late	CD8.EMRA.1
GZMK	0.807963	1.166e-15	4.2679e-11	Very Late	CD8.TEX																								ZNF683	-0.694937	6.3078e-22	2.3088e-17	Late	CD8.EMRA.1
NR4A2	2.8681	1.8523e-15	6.7799e-11	Very Late	CD8.TEX																								RPS4Y1	0.544543	2.0452e-21	7.4858e-17	Late	CD8.EMRA.1
HSPA8	-0.504024	1.9583e-15	7.1676e-11	Very Late	CD8.TEX																								AOAH	-0.50152	2.2411e-21	8.2029e-17	Late	CD8.EMRA.1
DUSP2	1.46343	2.0569e-15	7.5285e-11	Very Late	CD8.TEX																								PDE4D	0.788833	2.368e-21	8.6672e-17	Late	CD8.EMRA.1
RPL38	0.408845	2.295e-15	8.4003e-11	Very Late	CD8.TEX																								SBDS	0.685507	4.3555e-21	1.5942e-16	Late	CD8.EMRA.1
CORO1A	-0.339165	3.7665e-15	1.3786e-10	Very Late	CD8.TEX																								DUSP1	0.719193	5.0535e-21	1.8497e-16	Late	CD8.EMRA.1
H1FX	1.33501	6.2003e-15	2.2694e-10	Very Late	CD8.TEX																								CDKN2D	0.44838	7.4274e-21	2.7186e-16	Late	CD8.EMRA.1
JUND	0.929652	9.3526e-15	3.4232e-10	Very Late	CD8.TEX																								PIM3	0.734295	7.56e-21	2.7671e-16	Late	CD8.EMRA.1
BTG3	1.93645	1.0949e-14	4.0076e-10	Very Late	CD8.TEX																								TOB1	0.720716	1.5679e-20	5.7387e-16	Late	CD8.EMRA.1
HLA-DRA	0.971731	1.2633e-14	4.6239e-10	Very Late	CD8.TEX																								TENT5C	0.613148	1.6559e-19	6.061e-15	Late	CD8.EMRA.1
ASCL2	-1.59748	5.0422e-14	1.8456e-09	Very Late	CD8.TEX																								PTMS	0.554201	1.802e-19	6.5958e-15	Late	CD8.EMRA.1
S100A11	-0.548102	1.2328e-13	4.5123e-09	Very Late	CD8.TEX																								KLRG1	-0.411862	3.0525e-19	1.1173e-14	Late	CD8.EMRA.1
CCNL1	1.04534	1.5665e-13	5.7336e-09	Very Late	CD8.TEX																								RIPOR2	-0.391072	3.6312e-19	1.3291e-14	Late	CD8.EMRA.1
DDIT4	1.76609	2.2898e-13	8.3812e-09	Very Late	CD8.TEX																								HIST1H4C	0.633276	4.6523e-19	1.7028e-14	Late	CD8.EMRA.1
DUSP1	2.02917	3.2514e-13	1.1901e-08	Very Late	CD8.TEX																								CD69	0.548497	4.9532e-19	1.813e-14	Late	CD8.EMRA.1
S100A10	-0.407309	4.7573e-13	1.7413e-08	Very Late	CD8.TEX																								MBP	-0.369104	1.3468e-18	4.9294e-14	Late	CD8.EMRA.1
NFKB1	1.58655	5.8528e-13	2.1423e-08	Very Late	CD8.TEX																								LINC00861	-0.416062	3.5595e-18	1.3028e-13	Late	CD8.EMRA.1
TENT5C	1.51179	7.5837e-13	2.7758e-08	Very Late	CD8.TEX																								TNFAIP8	-0.474153	4.9628e-18	1.8165e-13	Late	CD8.EMRA.1
PPP1CA	-0.387447	1.1226e-12	4.1091e-08	Very Late	CD8.TEX																								BTG3	0.652553	8.2234e-18	3.0099e-13	Late	CD8.EMRA.1
SNHG8	1.14148	1.1734e-12	4.2951e-08	Very Late	CD8.TEX																								TRAF3IP3	-0.348636	3.1674e-17	1.1593e-12	Late	CD8.EMRA.1
ADGRE5	1.1959	1.4484e-12	5.3015e-08	Very Late	CD8.TEX																								IFI30	-0.931809	4.5962e-17	1.6823e-12	Late	CD8.EMRA.1
KLF9	2.11609	1.5109e-12	5.5301e-08	Very Late	CD8.TEX																								PIM1	-0.550153	9.3942e-17	3.4385e-12	Late	CD8.EMRA.1
CX3CR1	-0.992467	2.2553e-12	8.255e-08	Very Late	CD8.TEX																								LINC01578	0.344711	1.4535e-16	5.32e-12	Late	CD8.EMRA.1
SIK3	1.27906	2.7573e-12	1.0092e-07	Very Late	CD8.TEX																								CST3	-1.00451	1.6608e-16	6.0789e-12	Late	CD8.EMRA.1
ZFP36L2	1.01712	4.9086e-12	1.7966e-07	Very Late	CD8.TEX																								ABRACL	-0.375386	1.8937e-16	6.9313e-12	Late	CD8.EMRA.1
PSMB10	-0.449628	6.4724e-12	2.369e-07	Very Late	CD8.TEX																								THEMIS	-0.371951	2.4523e-16	8.9759e-12	Late	CD8.EMRA.1
GIMAP7	-0.774843	9.0753e-12	3.3217e-07	Very Late	CD8.TEX																								LPGAT1	-0.514034	4.9472e-16	1.8108e-11	Late	CD8.EMRA.1
MT2A	-0.390427	1.0608e-11	3.8828e-07	Very Late	CD8.TEX																								TNIK	-0.493859	5.3044e-16	1.9415e-11	Late	CD8.EMRA.1
PLAAT4	-0.344328	2.5744e-11	9.4227e-07	Very Late	CD8.TEX																								RORA	-0.371857	7.8077e-16	2.8578e-11	Late	CD8.EMRA.1
PPIB	-0.360224	2.6272e-11	9.6161e-07	Very Late	CD8.TEX																								GIMAP1	-0.436769	9.4484e-16	3.4583e-11	Late	CD8.EMRA.1
RNMT	1.15105	2.6643e-11	9.752e-07	Very Late	CD8.TEX																								STAT1	-0.333306	1.2595e-15	4.6099e-11	Late	CD8.EMRA.1
MATK	-0.569252	2.8197e-11	1.0321e-06	Very Late	CD8.TEX																								CXCR4	0.449678	3.2415e-15	1.1865e-10	Late	CD8.EMRA.1
NFKBIA	1.3704	2.9464e-11	1.0784e-06	Very Late	CD8.TEX																								IER2	0.3224	3.5274e-15	1.2911e-10	Late	CD8.EMRA.1
ZFP36L1	1.05	3.7175e-11	1.3607e-06	Very Late	CD8.TEX																								HIST1H1E	0.542786	3.7146e-15	1.3596e-10	Late	CD8.EMRA.1
SORL1	1.13363	3.9498e-11	1.4457e-06	Very Late	CD8.TEX																								SEMA4D	-0.446228	7.2647e-15	2.659e-10	Late	CD8.EMRA.1
SELPLG	-0.636838	3.9533e-11	1.447e-06	Very Late	CD8.TEX																								PELI1	0.625938	9.1296e-15	3.3416e-10	Late	CD8.EMRA.1
SLC38A1	0.696755	5.532e-11	2.0248e-06	Very Late	CD8.TEX																								SPOCK2	0.398341	9.4572e-15	3.4615e-10	Late	CD8.EMRA.1
RHOH	1.13613	5.6057e-11	2.0518e-06	Very Late	CD8.TEX																								MAPK1	-0.383451	1.0722e-14	3.9244e-10	Late	CD8.EMRA.1
CCL4	1.27413	6.8574e-11	2.51e-06	Very Late	CD8.TEX																								PPP2R2B	-0.533246	1.4308e-14	5.237e-10	Late	CD8.EMRA.1
COG5	1.13555	8.3502e-11	3.0563e-06	Very Late	CD8.TEX																								PPP1R15A	0.63454	1.9839e-14	7.2614e-10	Late	CD8.EMRA.1
TMEM35B	-1.18736	1.5129e-10	5.5375e-06	Very Late	CD8.TEX																								PLEKHF1	-0.568784	3.2435e-14	1.1872e-09	Late	CD8.EMRA.1
ZFP36	1.05886	2.4039e-10	8.7988e-06	Very Late	CD8.TEX																								RHOH	0.381521	5.8915e-14	2.1564e-09	Late	CD8.EMRA.1
ABI3	-0.821249	2.5847e-10	9.4605e-06	Very Late	CD8.TEX																								GLCCI1	-0.501263	8.109e-14	2.968e-09	Late	CD8.EMRA.1
SIRPG	1.03297	2.641e-10	9.6667e-06	Very Late	CD8.TEX																								HIST1H1C	0.535293	8.5391e-14	3.1255e-09	Late	CD8.EMRA.1
HMOX2	-0.722953	2.9118e-10	1.0658e-05	Very Late	CD8.TEX																								RBFOX2	0.415505	9.9483e-14	3.6413e-09	Late	CD8.EMRA.1
ABHD17A	-0.359342	3.1616e-10	1.1572e-05	Very Late	CD8.TEX																								PRMT2	-0.340626	2.0352e-13	7.4491e-09	Late	CD8.EMRA.1
ABLIM1	1.46551	3.9294e-10	1.4382e-05	Very Late	CD8.TEX																								DYNLL1	-0.376094	2.2274e-13	8.1527e-09	Late	CD8.EMRA.1
GIMAP4	-0.535279	4.8905e-10	1.79e-05	Very Late	CD8.TEX																								CLDND1	0.586534	2.6032e-13	9.5283e-09	Late	CD8.EMRA.1
AC004448.2	1.22978	5.0863e-10	1.8617e-05	Very Late	CD8.TEX																								BATF	-0.519421	4.9104e-13	1.7973e-08	Late	CD8.EMRA.1
BTG1	0.427145	5.7701e-10	2.112e-05	Very Late	CD8.TEX																								GADD45B	0.375124	7.6509e-13	2.8004e-08	Late	CD8.EMRA.1
DDX3Y	1.38789	6.2628e-10	2.2923e-05	Very Late	CD8.TEX																								INPP4B	-0.50983	9.1367e-13	3.3442e-08	Late	CD8.EMRA.1
AGTRAP	-0.72161	6.8154e-10	2.4946e-05	Very Late	CD8.TEX																								CBX4	0.53405	1.1493e-12	4.2067e-08	Late	CD8.EMRA.1
CDC42SE2	0.72412	7.4696e-10	2.734e-05	Very Late	CD8.TEX																								HSPA5	0.350401	2.119e-12	7.7559e-08	Late	CD8.EMRA.1
HLA-DMA	0.903868	8.3525e-10	3.0572e-05	Very Late	CD8.TEX																								GLIPR2	-0.370379	2.4362e-12	8.9171e-08	Late	CD8.EMRA.1
TSPYL2	1.96033	8.5632e-10	3.1343e-05	Very Late	CD8.TEX																								PHACTR2	-0.353728	2.8346e-12	1.0375e-07	Late	CD8.EMRA.1
DNAJB6	1.03988	9.8142e-10	3.5922e-05	Very Late	CD8.TEX																								DPYD	-0.393791	2.8551e-12	1.045e-07	Late	CD8.EMRA.1
ENC1	2.37438	1.0317e-09	3.7763e-05	Very Late	CD8.TEX																								GIMAP2	-0.585609	3.5952e-12	1.3159e-07	Late	CD8.EMRA.1
CAP1	-0.372254	1.0944e-09	4.0057e-05	Very Late	CD8.TEX																								SLA2	0.541518	4.0735e-12	1.491e-07	Late	CD8.EMRA.1
PSMB8	-0.333145	1.169e-09	4.2787e-05	Very Late	CD8.TEX																								AC004448.2	0.599514	4.4646e-12	1.6341e-07	Late	CD8.EMRA.1
PPP1R16B	1.23658	1.2384e-09	4.5327e-05	Very Late	CD8.TEX																								LAIR2	0.527521	5.3188e-12	1.9468e-07	Late	CD8.EMRA.1
PRKY	1.52383	1.2709e-09	4.6519e-05	Very Late	CD8.TEX																								PECAM1	-0.488135	6.3918e-12	2.3395e-07	Late	CD8.EMRA.1
ZC3HAV1	1.40536	1.3422e-09	4.9129e-05	Very Late	CD8.TEX																								PPP6R2	0.439954	9.0532e-12	3.3136e-07	Late	CD8.EMRA.1
SELENOW	-0.571919	1.4001e-09	5.1246e-05	Very Late	CD8.TEX																								NFKB1	0.473371	1.0281e-11	3.7631e-07	Late	CD8.EMRA.1
RNF115	1.0737	1.4683e-09	5.3743e-05	Very Late	CD8.TEX																								WHAMM	0.440647	1.7617e-11	6.448e-07	Late	CD8.EMRA.1
ARL6IP5	-0.437979	1.4729e-09	5.3912e-05	Very Late	CD8.TEX																								N4BP2L2	-0.404666	2.0535e-11	7.5164e-07	Late	CD8.EMRA.1
HDGFL3	1.79876	1.912e-09	6.9984e-05	Very Late	CD8.TEX																								MT-ND3	0.346658	2.1117e-11	7.7291e-07	Late	CD8.EMRA.1
ADGRG1	-0.614839	1.9277e-09	7.0559e-05	Very Late	CD8.TEX																								COG3	0.558476	2.4028e-11	8.7947e-07	Late	CD8.EMRA.1
PER1	2.00238	1.9534e-09	7.1497e-05	Very Late	CD8.TEX																								SCML4	-0.560982	3.2476e-11	1.1887e-06	Late	CD8.EMRA.1
DBI	-0.437032	1.9593e-09	7.1713e-05	Very Late	CD8.TEX																								STK39	-0.536584	6.1026e-11	2.2337e-06	Late	CD8.EMRA.1
MT-CYB	-0.621199	2.0104e-09	7.3584e-05	Very Late	CD8.TEX																								S1PR1	-0.420747	7.0451e-11	2.5787e-06	Late	CD8.EMRA.1
EML4	0.883875	2.0455e-09	7.487e-05	Very Late	CD8.TEX																								HIVEP3	-0.472953	8.0156e-11	2.9339e-06	Late	CD8.EMRA.1
PRPF4B	0.713682	2.1798e-09	7.9785e-05	Very Late	CD8.TEX																								GBP1	-0.409863	1.0386e-10	3.8016e-06	Late	CD8.EMRA.1
GNLY	-1.05504	2.6033e-09	9.5288e-05	Very Late	CD8.TEX																								PRKACB	-0.368082	1.345e-10	4.9229e-06	Late	CD8.EMRA.1
PCBP1	-0.478165	2.8052e-09	0.00010267	Very Late	CD8.TEX																								CD38	-0.566838	1.8543e-10	6.7873e-06	Late	CD8.EMRA.1
C17orf49	0.767561	2.8581e-09	0.00010461	Very Late	CD8.TEX																								TIPARP	0.515566	2.9897e-10	1.0943e-05	Late	CD8.EMRA.1
PPP1R15A	1.87863	3.3698e-09	0.00012334	Very Late	CD8.TEX																								PDE3B	0.380464	4.565e-10	1.6709e-05	Late	CD8.EMRA.1
IFIH1	2.42633	3.6045e-09	0.00013193	Very Late	CD8.TEX																								GNLY	1.01048	4.7077e-29	1.7231e-24	Late	CD8.EMRA.2
CAPZB	-0.326552	3.6687e-09	0.00013428	Very Late	CD8.TEX																								RPS2	-0.338201	5.4332e-27	1.9887e-22	Late	CD8.EMRA.2
IER5	1.63939	4.3293e-09	0.00015846	Very Late	CD8.TEX																								KLRC2	1.05985	5.0707e-20	1.856e-15	Late	CD8.EMRA.2
WHAMM	1.34866	4.7828e-09	0.00017506	Very Late	CD8.TEX																								AC004448.2	1.30755	3.1575e-15	1.1557e-10	Late	CD8.EMRA.2
DAD1	-0.621762	4.871e-09	0.00017829	Very Late	CD8.TEX																								CD27	2.20449	1.8482e-14	6.7647e-10	Late	CD8.EMRA.2
SBDS	1.30303	5.5415e-09	0.00020283	Very Late	CD8.TEX																								NFKBIA	1.12518	4.5875e-12	1.6791e-07	Late	CD8.EMRA.2
PTGER4	1.69122	6.5644e-09	0.00024027	Very Late	CD8.TEX																								GAS5	-0.767214	5.5314e-11	2.0246e-06	Late	CD8.EMRA.2
KMT2A	0.523484	7.4202e-09	0.00027159	Very Late	CD8.TEX																								LYZ	-1.91409	1.4215e-10	5.2029e-06	Late	CD8.EMRA.2
APRT	-0.372293	7.9146e-09	0.00028969	Very Late	CD8.TEX																								TSPO	0.393926	4.6054e-10	1.6857e-05	Late	CD8.EMRA.2
MRPL34	-0.777369	9.0701e-09	0.00033198	Very Late	CD8.TEX																								PTPRC	-0.323106	5.9371e-10	2.1731e-05	Late	CD8.EMRA.2
RSRP1	0.416602	9.2109e-09	0.00033714	Very Late	CD8.TEX																								S100A9	-1.74559	1.5952e-09	5.8387e-05	Late	CD8.EMRA.2
ATP6V0E1	-0.5936	1.0014e-08	0.00036652	Very Late	CD8.TEX																								BHLHE40	1.00566	3.1445e-09	0.00011509	Late	CD8.EMRA.2
APOBEC3G	-0.538069	1.2155e-08	0.0004449	Very Late	CD8.TEX																								RPL13A	-0.375962	1.2001e-08	0.00043928	Late	CD8.EMRA.2
HNRNPA1	0.430671	1.2922e-08	0.00047298	Very Late	CD8.TEX																								XCL2	-0.872226	2.108e-08	0.00077157	Late	CD8.EMRA.2
DYNLL1	-0.644948	1.3981e-08	0.00051175	Very Late	CD8.TEX																								S100A8	-1.63869	4.3461e-08	0.00159076	Late	CD8.EMRA.2
MIER1	0.802015	1.5104e-08	0.00055284	Very Late	CD8.TEX																								SBDS	1.01221	1.1433e-07	0.00418464	Late	CD8.EMRA.2
TBX21	-0.695755	1.6882e-08	0.00061791	Very Late	CD8.TEX																								CST3	-1.71117	1.4006e-07	0.00512638	Late	CD8.EMRA.2
NDUFAF3	-0.816037	1.7525e-08	0.00064145	Very Late	CD8.TEX																								BCL3	1.31115	1.8304e-07	0.00669966	Late	CD8.EMRA.2
C14orf119	-1.12333	1.754e-08	0.00064199	Very Late	CD8.TEX																								GZMB	0.420005	4.3732e-07	0.0160069	Late	CD8.EMRA.2
IKZF3	0.57278	1.7834e-08	0.00065276	Very Late	CD8.TEX																								EIF1	0.424931	4.3957e-07	0.0160892	Late	CD8.EMRA.2
DDX24	0.587891	1.9264e-08	0.00070512	Very Late	CD8.TEX																								CD96	-0.490765	4.6763e-07	0.0171163	Late	CD8.EMRA.2
PCMT1	-0.69196	2.1318e-08	0.0007803	Very Late	CD8.TEX																								RPS4Y1	-0.898762	2.9789e-31	1.0904e-26	Late	CD8.NaiveLike
MAPK1IP1L	0.942911	2.181e-08	0.0007983	Very Late	CD8.TEX																								FOS	-2.66762	5.3496e-15	1.9581e-10	Late	CD8.NaiveLike
FP671120.4	0.452178	2.2898e-08	0.00083812	Very Late	CD8.TEX																								FTH1	-0.60823	1.0815e-14	3.9584e-10	Late	CD8.NaiveLike
CDK17	1.20679	2.8369e-08	0.00103837	Very Late	CD8.TEX																								EIF1	-0.688791	4.506e-13	1.6493e-08	Late	CD8.NaiveLike
RORA	0.826988	2.9147e-08	0.00106685	Very Late	CD8.TEX																								TNFAIP3	-1.63668	7.172e-13	2.6251e-08	Late	CD8.NaiveLike
PTMS	0.877886	3.0225e-08	0.00110629	Very Late	CD8.TEX																								ZFP36	-1.37381	3.2831e-12	1.2017e-07	Late	CD8.NaiveLike
MANF	-1.18505	3.7782e-08	0.00138291	Very Late	CD8.TEX																								JUND	-0.871507	2.9042e-10	1.063e-05	Late	CD8.NaiveLike
PLEKHF1	-0.989425	4.1588e-08	0.00152221	Very Late	CD8.TEX																								IL32	0.726046	4.5054e-10	1.6491e-05	Late	CD8.NaiveLike
ARID5B	0.900206	4.2197e-08	0.00154449	Very Late	CD8.TEX																								TMSB4X	0.585598	1.9402e-08	0.00071014	Late	CD8.NaiveLike
NEAT1	0.646013	4.4697e-08	0.00163599	Very Late	CD8.TEX																								PPP2R2D	-1.66439	2.7365e-08	0.0010016	Late	CD8.NaiveLike
MEF2D	1.49401	4.775e-08	0.00174776	Very Late	CD8.TEX																								TRAC	1.31451	2.8216e-08	0.00103275	Late	CD8.NaiveLike
PELI1	1.48061	4.8033e-08	0.00175812	Very Late	CD8.TEX																								PRKY	-1.48263	3.7645e-08	0.0013779	Late	CD8.NaiveLike
HERPUD2	0.853618	4.8343e-08	0.00176944	Very Late	CD8.TEX																								SH3BGRL3	0.412034	3.9631e-08	0.00145057	Late	CD8.NaiveLike
PDE4B	1.60691	4.8538e-08	0.00177658	Very Late	CD8.TEX																								CD69	-1.19753	4.0054e-08	0.00146607	Late	CD8.NaiveLike
NDUFB3	-0.74591	5.5668e-08	0.00203755	Very Late	CD8.TEX																								MT2A	-1.37924	1.1753e-07	0.00430182	Late	CD8.NaiveLike
LYST	0.534434	5.6905e-08	0.00208284	Very Late	CD8.TEX																								YBX3	-1.04807	2.0458e-07	0.00748803	Late	CD8.NaiveLike
SIGIRR	-0.564261	5.7274e-08	0.00209634	Very Late	CD8.TEX																								ZFP36L2	-0.902384	3.278e-07	0.011998	Late	CD8.NaiveLike
NUP98	0.98641	5.779e-08	0.00211523	Very Late	CD8.TEX																								YPEL5	-1.26306	4.4813e-07	0.0164023	Late	CD8.NaiveLike
PSMA7	-0.393692	6.2201e-08	0.00227667	Very Late	CD8.TEX																								DDX3Y	-1.58359	4.6208e-07	0.0169129	Late	CD8.NaiveLike
RELL1	1.654	6.8187e-08	0.0024958	Very Late	CD8.TEX																								H3F3B	-0.506776	9.6601e-07	0.0353578	Late	CD8.NaiveLike
CNOT1	0.984278	7.5248e-08	0.00275424	Very Late	CD8.TEX																								NFKBIA	1.55018	2.6285e-68	9.6208e-64	Late	CD8.TEX
ARPC5	-0.454343	7.6739e-08	0.00280879	Very Late	CD8.TEX																								RPS26	1.01348	2.5218e-64	9.2304e-60	Late	CD8.TEX
NFAT5	0.855866	8.6839e-08	0.00317847	Very Late	CD8.TEX																								DUSP2	1.2148	1.0091e-63	3.6935e-59	Late	CD8.TEX
ARID4B	0.57314	9.15e-08	0.00334907	Very Late	CD8.TEX																								TNFAIP3	0.926981	1.1108e-60	4.0656e-56	Late	CD8.TEX
MGST3	-0.619869	9.7447e-08	0.00356676	Very Late	CD8.TEX																								GIMAP7	-0.490095	4.3105e-56	1.5777e-51	Late	CD8.TEX
CALR	-0.378696	1.0183e-07	0.00372724	Very Late	CD8.TEX																								JUN	1.39256	1.222e-50	4.4728e-46	Late	CD8.TEX
CDV3	0.711188	1.134e-07	0.00415059	Very Late	CD8.TEX																								LYZ	-1.81797	1.9073e-43	6.9811e-39	Late	CD8.TEX
UBC	0.582238	1.2904e-07	0.00472303	Very Late	CD8.TEX																								JUNB	0.703961	4.302e-41	1.5746e-36	Late	CD8.TEX
QKI	1.10578	1.3446e-07	0.00492139	Very Late	CD8.TEX																								KLRD1	-0.741568	5.3653e-40	1.9638e-35	Late	CD8.TEX
FCRL6	-0.487207	1.4167e-07	0.00518554	Very Late	CD8.TEX																								TENT5C	1.15103	1.312e-38	4.8022e-34	Late	CD8.TEX
KPNA2	2.01218	1.529e-07	0.00559658	Very Late	CD8.TEX																								NR4A2	1.93189	1.8221e-38	6.6693e-34	Late	CD8.TEX
PNRC1	0.51019	1.7168e-07	0.00628395	Very Late	CD8.TEX																								CD69	0.94202	2.3448e-38	8.5826e-34	Late	CD8.TEX
TBC1D10C	-0.469905	1.7403e-07	0.00637003	Very Late	CD8.TEX																								PSMB9	-0.429138	4.7924e-37	1.7541e-32	Late	CD8.TEX
HIF1A	1.16117	1.7667e-07	0.00646635	Very Late	CD8.TEX																								PMAIP1	1.81228	1.3235e-35	4.8442e-31	Late	CD8.TEX
TTC38	-1.01792	1.8322e-07	0.00670626	Very Late	CD8.TEX																								S100A11	-0.463023	1.4164e-35	5.1843e-31	Late	CD8.TEX
LAG3	0.946004	1.8611e-07	0.00681189	Very Late	CD8.TEX																								CD27	1.56628	3.7321e-35	1.366e-30	Late	CD8.TEX
GRK6	-0.578656	1.9418e-07	0.00710755	Very Late	CD8.TEX																								PIM3	1.60468	6.2196e-35	2.2765e-30	Late	CD8.TEX
KLRC4	0.502824	2.1089e-07	0.00771908	Very Late	CD8.TEX																								UBC	0.362118	4.133e-34	1.5128e-29	Late	CD8.TEX
SPOCK2	0.657286	2.1355e-07	0.00781636	Very Late	CD8.TEX																								S100A8	-1.46332	2.5788e-32	9.439e-28	Late	CD8.TEX
PABPC1	0.388804	2.1637e-07	0.00791974	Very Late	CD8.TEX																								EIF1	0.378062	7.108e-32	2.6017e-27	Late	CD8.TEX
CYTOR	0.556387	2.1838e-07	0.00799304	Very Late	CD8.TEX																								LINC00892	-1.82727	3.8624e-30	1.4137e-25	Late	CD8.TEX
MIR4435-2HG	0.749231	2.2498e-07	0.00823487	Very Late	CD8.TEX																								PELI1	1.4913	1.674e-29	6.1273e-25	Late	CD8.TEX
POP4	-0.871334	2.3325e-07	0.00853729	Very Late	CD8.TEX																								BTG1	0.464329	4.8866e-28	1.7886e-23	Late	CD8.TEX
UBE2S	1.11485	2.4541e-07	0.00898244	Very Late	CD8.TEX																								DUSP5	1.45881	1.3733e-27	5.0264e-23	Late	CD8.TEX
CBLB	0.395661	2.4938e-07	0.00912773	Very Late	CD8.TEX																								ATG2A	1.31465	3.0207e-27	1.1056e-22	Late	CD8.TEX
RPS6KA1	-0.591566	2.577e-07	0.0094323	Very Late	CD8.TEX																								DUSP1	0.829571	3.164e-27	1.1581e-22	Late	CD8.TEX
RBCK1	-0.570058	3.2563e-07	0.0119186	Very Late	CD8.TEX																								RBFOX2	0.611418	5.5559e-27	2.0336e-22	Late	CD8.TEX
TBCB	-0.337769	3.6177e-07	0.0132416	Very Late	CD8.TEX																								CXCR4	1.06335	8.0751e-27	2.9556e-22	Late	CD8.TEX
THAP11	-0.849487	3.6593e-07	0.0133938	Very Late	CD8.TEX																								DNAJB1	0.896958	2.3085e-26	8.4497e-22	Late	CD8.TEX
HLA-DRB1	0.749831	3.6961e-07	0.0135283	Very Late	CD8.TEX																								RHOH	0.749227	3.122e-26	1.1427e-21	Late	CD8.TEX
CNOT2	0.842981	3.8868e-07	0.0142264	Very Late	CD8.TEX																								SBDS	0.952922	3.4472e-26	1.2617e-21	Late	CD8.TEX
FOSL2	1.51049	4.1047e-07	0.015024	Very Late	CD8.TEX																								S100A9	-1.64494	6.3103e-26	2.3097e-21	Late	CD8.TEX
STK17B	0.723655	4.585e-07	0.016782	Very Late	CD8.TEX																								PSMB8	-0.345926	2.2465e-25	8.2227e-21	Late	CD8.TEX
NIPBL	0.408578	5.0801e-07	0.0185942	Very Late	CD8.TEX																								DYNLL1	-0.650067	3.7621e-25	1.377e-20	Late	CD8.TEX
RANBP2	0.952411	5.3087e-07	0.0194308	Very Late	CD8.TEX																								GIMAP5	-0.552961	7.0893e-25	2.5948e-20	Late	CD8.TEX
TEX264	-0.684997	5.4047e-07	0.0197823	Very Late	CD8.TEX																								LINC01578	0.534498	7.5414e-24	2.7603e-19	Late	CD8.TEX
LPXN	-0.548529	6.9158e-07	0.0253133	Very Late	CD8.TEX																								CEMIP2	0.729215	7.5463e-24	2.7621e-19	Late	CD8.TEX
TRMT112	-0.657278	7.2717e-07	0.026616	Very Late	CD8.TEX																								GIMAP4	-0.363602	7.9637e-24	2.9149e-19	Late	CD8.TEX
CORO7	0.644867	7.8637e-07	0.0287825	Very Late	CD8.TEX																								PDE4D	1.44801	1.8402e-23	6.7354e-19	Late	CD8.TEX
BTN3A2	-1.03032	8.2305e-07	0.0301253	Very Late	CD8.TEX																								TSC22D3	0.650657	2.0773e-23	7.6033e-19	Late	CD8.TEX
S1PR5	-0.704399	8.5002e-07	0.0311125	Very Late	CD8.TEX																								RELB	0.976071	1.1398e-22	4.1718e-18	Late	CD8.TEX
PRR5	-0.758379	8.7262e-07	0.0319397	Very Late	CD8.TEX																								ZFP36	0.485546	2.4097e-22	8.8201e-18	Late	CD8.TEX
TAF11	1.2935	9.631e-07	0.0352515	Very Late	CD8.TEX																								ZFP36L2	0.56501	3.9541e-22	1.4473e-17	Late	CD8.TEX
SETBP1	1.04383	1.1384e-06	0.0416674	Very Late	CD8.TEX																								PDE3B	1.16322	4.0848e-22	1.4951e-17	Late	CD8.TEX
VAMP8	-0.478159	1.1405e-06	0.0417462	Very Late	CD8.TEX																								RPS27	0.497335	6.4585e-22	2.3639e-17	Late	CD8.TEX
SNHG9	1.16535	1.1663e-06	0.0426871	Very Late	CD8.TEX																								HNRNPF	-0.374307	1.0334e-21	3.7823e-17	Late	CD8.TEX
OSTF1	-0.471448	1.1791e-06	0.0431587	Very Late	CD8.TEX																								ARPC5	-0.364844	1.11e-21	4.0629e-17	Late	CD8.TEX
DYRK1A	0.886584	1.1882e-06	0.0434914	Very Late	CD8.TEX																								CDK2AP2	-0.484186	1.1544e-21	4.2254e-17	Late	CD8.TEX
DDX6	0.556016	1.2515e-06	0.0458067	Very Late	CD8.TEX																								NFKBIZ	0.950637	1.5036e-21	5.5034e-17	Late	CD8.TEX
HCLS1	-0.349123	1.2649e-06	0.0462971	Very Late	CD8.TEX																								BTG2	0.813177	2.9821e-21	1.0915e-16	Late	CD8.TEX
GNA13	0.937344	1.2739e-06	0.0466275	Very Late	CD8.TEX																								CD8B	0.424151	3.2614e-21	1.1937e-16	Late	CD8.TEX
																													PLAAT4	-0.343353	3.4549e-21	1.2646e-16	Late	CD8.TEX
																													KLF6	0.355644	2.1959e-20	8.0374e-16	Late	CD8.TEX
																													RUNX3	0.51232	2.4067e-20	8.809e-16	Late	CD8.TEX
																													GRAP2	-0.676442	4.3115e-20	1.5781e-15	Late	CD8.TEX
																													EFHD2	-0.489226	1.1528e-19	4.2196e-15	Late	CD8.TEX
																													SLC2A3	0.535149	1.2735e-19	4.6612e-15	Late	CD8.TEX
																													DDX6	0.557154	3.7673e-19	1.3789e-14	Late	CD8.TEX
																													RPL37	0.392572	3.8449e-19	1.4073e-14	Late	CD8.TEX
																													GNLY	0.62538	4.1461e-19	1.5176e-14	Late	CD8.TEX
																													AC004448.2	-0.789775	7.807e-19	2.8575e-14	Late	CD8.TEX
																													SIT1	-0.41565	1.9694e-18	7.2085e-14	Late	CD8.TEX
																													ACTR3	-0.340429	3.7392e-18	1.3686e-13	Late	CD8.TEX
																													VPS37B	0.657477	3.8705e-18	1.4167e-13	Late	CD8.TEX
																													XCL2	-0.918016	4.4883e-18	1.6428e-13	Late	CD8.TEX
																													WHAMM	0.783571	8.1759e-18	2.9926e-13	Late	CD8.TEX
																													FBXO33	0.83841	1.2636e-17	4.6251e-13	Late	CD8.TEX
																													RBM39	0.347031	2.9793e-17	1.0905e-12	Late	CD8.TEX
																													PIM1	-0.660445	3.2198e-17	1.1785e-12	Late	CD8.TEX
																													PSMA5	-0.362976	4.1624e-17	1.5235e-12	Late	CD8.TEX
																													TNFAIP8	-0.396004	4.4335e-17	1.6228e-12	Late	CD8.TEX
																													ARHGEF3	-0.570823	1.0487e-16	3.8384e-12	Late	CD8.TEX
																													CCNL1	0.522805	1.0753e-16	3.9359e-12	Late	CD8.TEX
																													KLRC4	0.700806	1.4878e-16	5.4455e-12	Late	CD8.TEX
																													IFI30	-0.990515	2.0084e-16	7.3512e-12	Late	CD8.TEX
																													RPS27L	-0.330098	2.1608e-16	7.909e-12	Late	CD8.TEX
																													LINC02446	-0.611437	2.7699e-16	1.0138e-11	Late	CD8.TEX
																													PYCARD	-0.396427	3.5912e-16	1.3145e-11	Late	CD8.TEX
																													BHLHE40	0.769733	3.6202e-16	1.3251e-11	Late	CD8.TEX
																													PIK3R1	0.598049	4.7839e-16	1.751e-11	Late	CD8.TEX
																													REL	0.495791	6.8321e-16	2.5007e-11	Late	CD8.TEX
																													PSMA7	-0.335784	6.9254e-16	2.5348e-11	Late	CD8.TEX
																													ABRACL	-0.34342	7.7748e-16	2.8457e-11	Late	CD8.TEX
																													PLEKHF1	-0.789429	8.2285e-16	3.0118e-11	Late	CD8.TEX
																													GADD45B	0.592897	8.6658e-16	3.1718e-11	Late	CD8.TEX
																													ABI3	-0.55858	1.1505e-15	4.2109e-11	Late	CD8.TEX
																													PRDM1	1.03105	1.3337e-15	4.8815e-11	Late	CD8.TEX
																													PLEK	-0.457215	1.5962e-15	5.8424e-11	Late	CD8.TEX
																													RPL39	0.429698	2.5969e-15	9.5051e-11	Late	CD8.TEX
																													MRPL51	-0.431744	3.1564e-15	1.1553e-10	Late	CD8.TEX
																													EPC1	0.409714	3.572e-15	1.3074e-10	Late	CD8.TEX
																													PPP1R15A	0.617824	4.5277e-15	1.6572e-10	Late	CD8.TEX
																													CASP1	-0.474296	1.0095e-14	3.6949e-10	Late	CD8.TEX
																													RPS21	0.469902	1.1965e-14	4.3795e-10	Late	CD8.TEX
																													NDUFAB1	-0.326157	1.7388e-14	6.3644e-10	Late	CD8.TEX
																													RBM38	0.804019	1.939e-14	7.097e-10	Late	CD8.TEX
																													TYROBP	-1.4845	1.9967e-14	7.3084e-10	Late	CD8.TEX
																													PRDX3	-0.604567	3.1619e-14	1.1573e-09	Late	CD8.TEX
																													CX3CR1	-0.592003	4.94e-14	1.8081e-09	Late	CD8.TEX
																													FP236383.3	0.400716	5.4525e-14	1.9957e-09	Late	CD8.TEX
																													G0S2	1.54559	1.2741e-54	4.6634e-50	Late	Mono CD14
																													GIMAP7	-0.691861	1.6582e-34	6.0694e-30	Late	Mono CD14
																													MNDA	-0.385501	1.9184e-32	7.0217e-28	Late	Mono CD14
																													HIF1A	0.367744	1.1593e-28	4.2432e-24	Late	Mono CD14
																													NINJ1	0.593622	2.0381e-25	7.4599e-21	Late	Mono CD14
																													KLF10	0.582959	4.8347e-25	1.7696e-20	Late	Mono CD14
																													NRG1	-0.768444	3.6822e-24	1.3477e-19	Late	Mono CD14
																													RAB20	0.627247	4.7493e-24	1.7383e-19	Late	Mono CD14
																													USP12	0.552842	5.7365e-24	2.0997e-19	Late	Mono CD14
																													IRF2BP2	0.647821	6.3345e-24	2.3186e-19	Late	Mono CD14
																													CDKN1A	0.567773	1.2355e-22	4.5223e-18	Late	Mono CD14
																													ASGR2	-0.528539	3.5638e-22	1.3044e-17	Late	Mono CD14
																													DUSP6	-0.331175	5.7191e-22	2.0933e-17	Late	Mono CD14
																													RBFOX2	0.533031	3.208e-21	1.1742e-16	Late	Mono CD14
																													NFKBIA	0.446779	4.5437e-21	1.6631e-16	Late	Mono CD14
																													CX3CR1	-0.695341	5.9457e-21	2.1763e-16	Late	Mono CD14
																													KLF2	-0.334581	6.2218e-21	2.2773e-16	Late	Mono CD14
																													F13A1	-0.519592	1.9057e-20	6.9752e-16	Late	Mono CD14
																													UBC	0.350622	2.0579e-20	7.5324e-16	Late	Mono CD14
																													MIR22HG	0.751311	1.5053e-18	5.5098e-14	Late	Mono CD14
																													CEBPB	0.447144	1.8859e-18	6.9026e-14	Late	Mono CD14
																													MEF2D	0.508174	4.3994e-18	1.6103e-13	Late	Mono CD14
																													SMAP2	-0.342965	5.841e-18	2.1379e-13	Late	Mono CD14
																													GCA	-0.382835	9.8403e-18	3.6018e-13	Late	Mono CD14
																													PLIN2	0.819369	1.3274e-17	4.8586e-13	Late	Mono CD14
																													FRAT2	-0.521451	1.1583e-16	4.2395e-12	Late	Mono CD14
																													PLAC8	-0.386183	2.8356e-16	1.0379e-11	Late	Mono CD14
																													AC020656.1	0.475392	3.326e-16	1.2174e-11	Late	Mono CD14
																													HIST1H1E	0.630679	3.7049e-16	1.3561e-11	Late	Mono CD14
																													CXXC5	0.705073	4.0014e-16	1.4646e-11	Late	Mono CD14
																													VPS37B	0.416282	1.2258e-15	4.4865e-11	Late	Mono CD14
																													C20orf27	0.42588	1.5697e-15	5.7455e-11	Late	Mono CD14
																													UPP1	0.443439	2.4349e-15	8.9121e-11	Late	Mono CD14
																													RIPOR2	-0.38695	6.7826e-15	2.4826e-10	Late	Mono CD14
																													DYNLL1	-0.382821	1.4229e-14	5.2081e-10	Late	Mono CD14
																													PLBD1	-0.372658	2.1906e-14	8.0181e-10	Late	Mono CD14
																													GADD45B	0.455581	2.4991e-14	9.1473e-10	Late	Mono CD14
																													GIMAP1	-0.512028	2.9958e-14	1.0965e-09	Late	Mono CD14
																													SNHG15	0.489504	8.5238e-14	3.1199e-09	Late	Mono CD14
																													SMCO4	-0.36015	8.9065e-14	3.2599e-09	Late	Mono CD14
																													TLE3	0.460753	9.7993e-14	3.5867e-09	Late	Mono CD14
																													PHACTR1	0.631881	1.1292e-13	4.1332e-09	Late	Mono CD14
																													GYPC	0.507008	1.2888e-13	4.7174e-09	Late	Mono CD14
																													MT2A	0.349073	1.3116e-13	4.8008e-09	Late	Mono CD14
																													ICAM1	0.492295	4.1453e-13	1.5173e-08	Late	Mono CD14
																													BHLHE40	0.552988	9.9131e-13	3.6284e-08	Late	Mono CD14
																													CSRNP1	0.49163	1.2564e-12	4.5986e-08	Late	Mono CD14
																													ATF3	0.501555	1.4964e-12	5.477e-08	Late	Mono CD14
																													MAP1LC3B	0.322445	2.4757e-12	9.0616e-08	Late	Mono CD14
																													CBX6	0.591446	2.6606e-12	9.7384e-08	Late	Mono CD14
																													NLRP3	0.346353	1.1212e-11	4.1037e-07	Late	Mono CD14
																													AC004448.2	-0.384363	1.2269e-11	4.4907e-07	Late	Mono CD14
																													FP236383.3	0.397359	1.3396e-11	4.9031e-07	Late	Mono CD14
																													IER5	0.470607	1.6236e-11	5.9426e-07	Late	Mono CD14
																													PLCB1	-0.352039	1.7346e-11	6.3488e-07	Late	Mono CD14
																													TNFAIP3	0.360968	3.2866e-11	1.203e-06	Late	Mono CD14
																													H1FX	0.433249	3.4569e-11	1.2653e-06	Late	Mono CD14
																													TENT4A	0.444129	6.1979e-11	2.2685e-06	Late	Mono CD14
																													ELF4	0.334723	6.2627e-11	2.2923e-06	Late	Mono CD14
																													CD300A	-0.430786	6.4959e-11	2.3776e-06	Late	Mono CD14
																													S100A12	-0.420442	8.1633e-11	2.9879e-06	Late	Mono CD14
																													CARD19	0.357598	9.9527e-11	3.6429e-06	Late	Mono CD14
																													NFIL3	0.413068	1.218e-10	4.4583e-06	Late	Mono CD14
																													PLAUR	0.410039	2.324e-10	8.5063e-06	Late	Mono CD14
																													EHD4	0.476455	2.3731e-10	8.6859e-06	Late	Mono CD14
																													AL034397.3	-0.381863	3.2866e-10	1.2029e-05	Late	Mono CD14
																													HDAC9	-0.386605	3.3614e-10	1.2304e-05	Late	Mono CD14
																													MAPKAPK2	0.39694	3.3832e-10	1.2383e-05	Late	Mono CD14
																													RIT1	0.479665	5.6289e-10	2.0603e-05	Late	Mono CD14
																													TMEM104	0.436294	6.2549e-10	2.2894e-05	Late	Mono CD14
																													HIPK3	-0.346089	7.8347e-10	2.8676e-05	Late	Mono CD14
																													NSF	-0.334339	8.9247e-10	3.2666e-05	Late	Mono CD14
																													BCL2A1	0.347362	1.3442e-09	4.9199e-05	Late	Mono CD14
																													IRF2	-0.438762	1.4896e-09	5.4523e-05	Late	Mono CD14
																													FLVCR2	-0.442411	2.1155e-09	7.7431e-05	Late	Mono CD14
																													PPIF	0.614061	2.2981e-09	8.4115e-05	Late	Mono CD14
																													RRP12	-0.385795	3.7029e-09	0.00013553	Late	Mono CD14
																													USP36	0.396755	3.8727e-09	0.00014175	Late	Mono CD14
																													COG3	0.421597	4.7512e-09	0.0001739	Late	Mono CD14
																													S1PR4	-0.464807	6.2407e-09	0.00022842	Late	Mono CD14
																													RNF11	0.376829	1.1471e-08	0.00041986	Late	Mono CD14
																													RABGEF1	0.340437	1.2039e-08	0.00044066	Late	Mono CD14
																													TCF7L2	-0.460135	1.834e-08	0.00067126	Late	Mono CD14
																													IST1	0.326421	3.8107e-08	0.00139479	Late	Mono CD14
																													MAP7D1	0.372905	3.892e-08	0.00142454	Late	Mono CD14
																													FBRS	0.471457	4.1871e-08	0.00153256	Late	Mono CD14
																													HSPA1A	-0.340102	6.5283e-08	0.00238951	Late	Mono CD14
																													CCDC59	0.395217	7.6055e-08	0.00278377	Late	Mono CD14
																													MTHFS	-0.391479	7.7543e-08	0.00283822	Late	Mono CD14
																													ATP13A3	0.35011	1.0906e-07	0.00399167	Late	Mono CD14
																													LSM6	-0.337825	1.3949e-07	0.00510559	Late	Mono CD14
																													SUPT6H	0.350073	1.8953e-07	0.00693712	Late	Mono CD14
																													C15orf39	0.43784	1.9033e-07	0.00696644	Late	Mono CD14
																													ACSL1	0.334303	2.7253e-07	0.00997526	Late	Mono CD14
																													UBALD2	0.324899	3.2124e-07	0.0117579	Late	Mono CD14
																													TMTC2	-0.355481	3.7446e-07	0.0137059	Late	Mono CD14
																													HMGA1	0.432342	3.7582e-07	0.0137556	Late	Mono CD14
																													IGFBP7	-0.324079	3.7762e-07	0.0138216	Late	Mono CD14
																													LMTK2	0.363074	6.6436e-07	0.0243171	Late	Mono CD14
																													DOCK4	0.450254	7.6936e-07	0.02816	Late	Mono CD14
																													KLF2	-0.341058	7.8993e-45	2.8913e-40	Late	Mono CD16
																													G0S2	1.83222	2.7418e-41	1.0035e-36	Late	Mono CD16
																													CD52	0.493563	2.0252e-37	7.4127e-33	Late	Mono CD16
																													DUSP6	-0.413367	3.1648e-37	1.1584e-32	Late	Mono CD16
																													CX3CR1	-0.497767	3.7673e-37	1.3789e-32	Late	Mono CD16
																													AC004448.2	-0.550233	8.4072e-35	3.0772e-30	Late	Mono CD16
																													CST3	0.323613	4.4755e-33	1.6381e-28	Late	Mono CD16
																													DYNLL1	-0.442978	1.2843e-32	4.7006e-28	Late	Mono CD16
																													LILRB1	-0.363547	9.7744e-26	3.5776e-21	Late	Mono CD16
																													C20orf27	0.472284	9.7972e-25	3.586e-20	Late	Mono CD16
																													TMEM176B	0.388107	2.8269e-22	1.0347e-17	Late	Mono CD16
																													ZNF217	-0.602198	1.5189e-21	5.5594e-17	Late	Mono CD16
																													NFKBIA	0.54165	1.5209e-21	5.567e-17	Late	Mono CD16
																													RBFOX2	0.464574	1.6133e-21	5.9049e-17	Late	Mono CD16
																													PIM3	0.704353	2.4344e-20	8.9103e-16	Late	Mono CD16
																													GIMAP7	-0.438636	2.6686e-19	9.7678e-15	Late	Mono CD16
																													RIPOR2	-0.45332	3.2579e-19	1.1925e-14	Late	Mono CD16
																													TLR2	-0.551052	4.4127e-19	1.6151e-14	Late	Mono CD16
																													HIF1A	0.42051	2.341e-18	8.5685e-14	Late	Mono CD16
																													VCAN	-0.60245	5.6759e-18	2.0775e-13	Late	Mono CD16
																													UPP1	0.49516	2.1344e-17	7.8125e-13	Late	Mono CD16
																													SNHG15	0.669723	7.879e-17	2.8839e-12	Late	Mono CD16
																													MT-CYB	-0.478401	2.049e-16	7.4998e-12	Late	Mono CD16
																													SMCO4	-0.361064	2.3047e-16	8.4356e-12	Late	Mono CD16
																													ICAM1	0.675137	1.6425e-15	6.012e-11	Late	Mono CD16
																													CCND3	-0.350876	1.7545e-15	6.422e-11	Late	Mono CD16
																													RESF1	-0.409145	2.0957e-15	7.6706e-11	Late	Mono CD16
																													MT-CO1	-0.443171	4.6108e-14	1.6876e-09	Late	Mono CD16
																													TAF7	-0.4756	5.7839e-14	2.117e-09	Late	Mono CD16
																													PER1	0.540094	8.6466e-14	3.1648e-09	Late	Mono CD16
																													ADGRE2	-0.372359	9.1047e-14	3.3325e-09	Late	Mono CD16
																													FMNL2	-0.784638	1.1578e-13	4.2377e-09	Late	Mono CD16
																													TCF7L2	-0.425537	1.5405e-13	5.6386e-09	Late	Mono CD16
																													MT-CO3	-0.462914	1.8512e-13	6.7758e-09	Late	Mono CD16
																													RIPK2	0.426876	2.0038e-13	7.3342e-09	Late	Mono CD16
																													RNF144B	-0.715811	2.2231e-13	8.1368e-09	Late	Mono CD16
																													IFI44L	0.4203	2.5724e-13	9.4154e-09	Late	Mono CD16
																													ERAP2	0.382282	2.8064e-13	1.0272e-08	Late	Mono CD16
																													LYST	-0.392715	4.4628e-13	1.6335e-08	Late	Mono CD16
																													MDFIC	-0.508487	4.9261e-13	1.803e-08	Late	Mono CD16
																													RPS29	0.449712	7.0878e-13	2.5943e-08	Late	Mono CD16
																													OAS1	-0.383391	1.0278e-12	3.7618e-08	Late	Mono CD16
																													NINJ1	0.420378	1.0936e-12	4.0028e-08	Late	Mono CD16
																													WSB1	-0.450103	1.4343e-12	5.25e-08	Late	Mono CD16
																													CD14	-0.427904	1.7845e-12	6.5316e-08	Late	Mono CD16
																													MARCH1	-0.450445	2.1456e-12	7.8532e-08	Late	Mono CD16
																													TMPO	-0.337545	2.705e-12	9.901e-08	Late	Mono CD16
																													MT-ND4L	-0.494824	3.453e-12	1.2639e-07	Late	Mono CD16
																													GSN	-0.424764	3.9153e-12	1.4331e-07	Late	Mono CD16
																													MYLIP	0.359986	2.5761e-11	9.4292e-07	Late	Mono CD16
																													GIMAP8	-0.509873	2.6747e-11	9.7901e-07	Late	Mono CD16
																													GIMAP1	-0.344118	3.0764e-11	1.126e-06	Late	Mono CD16
																													ARHGAP15	-0.416993	8.5756e-11	3.1388e-06	Late	Mono CD16
																													SLA	-0.543558	1.0439e-10	3.8208e-06	Late	Mono CD16
																													SVIL	-0.463309	1.4046e-10	5.1412e-06	Late	Mono CD16
																													CDKN1A	0.402666	1.6584e-10	6.0699e-06	Late	Mono CD16
																													MIR22HG	0.590143	2.3455e-10	8.5851e-06	Late	Mono CD16
																													RPL39	0.326559	2.8355e-10	1.0378e-05	Late	Mono CD16
																													MT-ND2	-0.332108	2.9532e-10	1.0809e-05	Late	Mono CD16
																													ATF3	0.331663	3.1563e-10	1.1553e-05	Late	Mono CD16
																													MT-ND5	-0.353139	3.2567e-10	1.192e-05	Late	Mono CD16
																													BCL3	0.492806	4.0181e-10	1.4707e-05	Late	Mono CD16
																													CD83	0.33322	4.3157e-10	1.5796e-05	Late	Mono CD16
																													SKAP2	-0.347323	9.0354e-10	3.3071e-05	Late	Mono CD16
																													WASHC2A	-0.329728	9.5104e-10	3.481e-05	Late	Mono CD16
																													FLVCR2	-0.57292	1.0065e-09	3.6839e-05	Late	Mono CD16
																													RPL37	0.362378	1.3528e-09	4.9515e-05	Late	Mono CD16
																													GYPC	0.475269	1.7243e-09	6.3114e-05	Late	Mono CD16
																													JAZF1	-0.43379	1.7499e-09	6.4051e-05	Late	Mono CD16
																													RAB20	0.506733	2.2095e-09	8.0873e-05	Late	Mono CD16
																													SHTN1	-0.333916	3.2945e-09	0.00012058	Late	Mono CD16
																													RPS21	0.346739	3.5542e-09	0.00013009	Late	Mono CD16
																													PAG1	-0.518708	3.8765e-09	0.00014189	Late	Mono CD16
																													RPS28	0.3374	4.2637e-09	0.00015606	Late	Mono CD16
																													CHST2	-0.431992	4.8096e-09	0.00017604	Late	Mono CD16
																													MT-CO2	-0.370971	7.101e-09	0.00025991	Late	Mono CD16
																													CDKN2D	0.371215	7.2426e-09	0.00026509	Late	Mono CD16
																													GADD45B	0.421624	9.2563e-09	0.0003388	Late	Mono CD16
																													FNIP2	-0.586742	1.0641e-08	0.00038949	Late	Mono CD16
																													N4BP2L2	-0.360885	1.5904e-08	0.00058213	Late	Mono CD16
																													DBP	0.588982	2.1935e-08	0.00080286	Late	Mono CD16
																													USP12	0.427544	2.2894e-08	0.00083796	Late	Mono CD16
																													PPTC7	0.32603	2.7655e-08	0.00101221	Late	Mono CD16
																													FKBP5	-0.466327	2.8425e-08	0.00104042	Late	Mono CD16
																													SSH2	-0.381406	2.9912e-08	0.00109485	Late	Mono CD16
																													ECHDC1	-0.330508	4.9166e-08	0.00179956	Late	Mono CD16
																													APAF1	-0.422707	5.0891e-08	0.00186272	Late	Mono CD16
																													IRF2BP2	0.5471	5.6516e-08	0.00206859	Late	Mono CD16
																													SNED1	-0.34367	6.8352e-08	0.00250183	Late	Mono CD16
																													NLRP3	0.453758	7.8742e-08	0.0028821	Late	Mono CD16
																													ATP5ME	0.458682	8.7249e-08	0.0031935	Late	Mono CD16
																													CHD9	-0.442338	9.6797e-08	0.00354296	Late	Mono CD16
																													MICU1	-0.383064	1.0036e-07	0.00367335	Late	Mono CD16
																													SBDS	0.438698	1.0835e-07	0.00396576	Late	Mono CD16
																													PLAGL2	-0.403089	1.7604e-07	0.00644343	Late	Mono CD16
																													NXT1	0.695236	1.8373e-07	0.00672497	Late	Mono CD16
																													NOTCH2NLA	-0.439824	1.9562e-07	0.0071601	Late	Mono CD16
																													TBC1D5	-0.328568	1.9674e-07	0.00720097	Late	Mono CD16
																													CMC1	-0.366232	2.5476e-07	0.00932455	Late	Mono CD16
																													SBNO2	-0.322817	2.7224e-07	0.00996439	Late	Mono CD16
																													LAIR2	1.07	6.38e-38	2.3352e-33	Late	NK
																													EIF1	0.406107	1.04e-35	3.8065e-31	Late	NK
																													HIST1H1E	0.677409	2.0363e-34	7.4533e-30	Late	NK
																													NFKBIA	0.644174	7.9884e-31	2.9239e-26	Late	NK
																													S100A8	-0.905677	8.9267e-30	3.2673e-25	Late	NK
																													CD2	-0.451725	1.1461e-28	4.195e-24	Late	NK
																													GIMAP7	-0.353561	4.2692e-28	1.5626e-23	Late	NK
																													S100A9	-0.808196	5.8649e-24	2.1467e-19	Late	NK
																													VPS37B	0.388148	6.4653e-23	2.3664e-18	Late	NK
																													COG3	0.646674	8.1058e-22	2.9669e-17	Late	NK
																													RIOK3	0.455272	1.4333e-21	5.2462e-17	Late	NK
																													LINC01578	0.402747	2.3984e-21	8.7787e-17	Late	NK
																													MT-ND4L	-0.468449	9.2977e-20	3.4031e-15	Late	NK
																													GIMAP1	-0.486885	9.8289e-19	3.5976e-14	Late	NK
																													LYZ	-0.715763	1.3799e-18	5.0508e-14	Late	NK
																													LGALS1	0.525369	2.6465e-18	9.6867e-14	Late	NK
																													RELB	0.624904	1.3394e-17	4.9024e-13	Late	NK
																													ATG2A	0.593357	2.2064e-17	8.0758e-13	Late	NK
																													WHAMM	0.459365	2.267e-17	8.2978e-13	Late	NK
																													HIST1H1C	0.527963	9.7611e-17	3.5727e-12	Late	NK
																													KLRG1	-0.788732	2.2668e-15	8.2968e-11	Late	NK
																													SBDS	0.534834	2.5476e-15	9.3247e-11	Late	NK
																													CD69	0.35228	4.46e-15	1.6325e-10	Late	NK
																													TRG-AS1	-0.743378	8.7917e-15	3.2179e-10	Late	NK
																													MT-CYB	-0.399188	2.4589e-14	9e-10	Late	NK
																													GPR65	-0.357289	5.3372e-14	1.9535e-09	Late	NK
																													DUSP1	0.568531	7.0541e-14	2.5819e-09	Late	NK
																													RAMP1	0.837916	2.1684e-13	7.9367e-09	Late	NK
																													PPP1R15A	0.635771	6.1975e-13	2.2684e-08	Late	NK
																													TRA2B	0.39694	6.9932e-13	2.5597e-08	Late	NK
																													ZBP1	0.358846	9.5849e-13	3.5082e-08	Late	NK
																													KIR3DL1	0.481543	1.3024e-12	4.7672e-08	Late	NK
																													HSPA5	0.389651	3.9418e-12	1.4428e-07	Late	NK
																													NFKBIZ	0.567537	5.1819e-12	1.8967e-07	Late	NK
																													FCRL6	-0.726087	1.0255e-11	3.7537e-07	Late	NK
																													RBBP6	0.377314	3.4614e-11	1.2669e-06	Late	NK
																													PILRB	-0.58952	4.1385e-11	1.5148e-06	Late	NK
																													CBX4	0.447649	9.3462e-11	3.4209e-06	Late	NK
																													PDGFD	-0.747866	1.6959e-10	6.2075e-06	Late	NK
																													LY6E	0.337093	4.6048e-10	1.6854e-05	Late	NK
																													GTF2B	0.368932	5.5379e-10	2.027e-05	Late	NK
																													ZFAND2A	0.450006	6.1728e-10	2.2594e-05	Late	NK
																													TMED3	0.423311	1.0075e-09	3.6876e-05	Late	NK
																													RIPOR2	-0.404282	1.0516e-09	3.849e-05	Late	NK
																													RESF1	-0.397576	1.12e-09	4.0995e-05	Late	NK
																													MT-ND1	-0.345142	1.3242e-09	4.8469e-05	Late	NK
																													PYHIN1	-0.431596	1.5864e-09	5.8065e-05	Late	NK
																													LYST	-0.453483	2.2495e-09	8.2337e-05	Late	NK
																													IER5	0.578649	3.4061e-09	0.00012467	Late	NK
																													IKZF2	-0.560302	4.2339e-09	0.00015497	Late	NK
																													MT-ND2	-0.360445	1.0559e-08	0.00038648	Late	NK
																													FLI1	-0.353723	1.8043e-08	0.00066039	Late	NK
																													GIMAP6	-0.336718	1.9169e-08	0.00070163	Late	NK
																													RSL24D1	0.380562	1.9515e-08	0.00071429	Late	NK
																													RNF139	0.549093	2.1381e-08	0.00078259	Late	NK
																													POP5	-0.367808	4.1382e-08	0.00151466	Late	NK
																													MT-ND5	-0.334714	7.4491e-08	0.00272652	Late	NK
																													RSBN1L	-0.330202	8.8862e-08	0.00325252	Late	NK
																													RLF	0.344079	9.194e-08	0.00336518	Late	NK
																													OSER1	0.336278	9.4908e-08	0.00347383	Late	NK
																													ETF1	0.343516	1.4433e-07	0.00528268	Late	NK
																													TWF1	0.346642	1.7048e-07	0.00623974	Late	NK
																													PRNP	0.344473	2.1705e-07	0.00794445	Late	NK
																													PCIF1	0.414103	2.305e-07	0.00843677	Late	NK
																													RFTN1	-0.350239	4.1551e-07	0.0152086	Late	NK
																													APBB1IP	-0.334318	4.1694e-07	0.015261	Late	NK
																													NSF	-0.596175	4.2777e-07	0.0156572	Late	NK
																													ST6GAL1	-0.502793	4.6892e-07	0.0171633	Late	NK
																													MT-ND4	-0.33563	6.2855e-07	0.0230061	Late	NK
																													RBFOX2	0.494048	1.0058e-06	0.0368134	Late	NK
																													IL12RB2	0.362851	1.3098e-06	0.0479402	Late	NK
																													AC004448.2	-0.895479	7.4384e-32	2.7226e-27	Late	NK CD56bright
																													LINC01578	0.59138	2.659e-29	9.7324e-25	Late	NK CD56bright
																													NFKBIA	0.735949	4.5781e-27	1.6757e-22	Late	NK CD56bright
																													UCP2	-0.464274	5.1997e-25	1.9032e-20	Late	NK CD56bright
																													EIF1	0.418383	7.1224e-24	2.6069e-19	Late	NK CD56bright
																													GIMAP7	-0.518211	8.5634e-24	3.1344e-19	Late	NK CD56bright
																													HIST1H1E	0.672171	1.0388e-20	3.8023e-16	Late	NK CD56bright
																													RBFOX2	0.527315	3.0037e-20	1.0994e-15	Late	NK CD56bright
																													GIMAP4	-0.585366	6.2772e-20	2.2976e-15	Late	NK CD56bright
																													CD2	-0.351338	1.6467e-19	6.0272e-15	Late	NK CD56bright
																													HIF1A	0.745747	3.217e-19	1.1775e-14	Late	NK CD56bright
																													CD3E	0.477686	3.5901e-18	1.3141e-13	Late	NK CD56bright
																													ARL4C	-0.334078	5.5545e-18	2.0331e-13	Late	NK CD56bright
																													VPS37B	0.806702	8.067e-18	2.9527e-13	Late	NK CD56bright
																													RUNX3	0.435357	2.6708e-16	9.7756e-12	Late	NK CD56bright
																													IL32	-0.382653	2.9083e-16	1.0645e-11	Late	NK CD56bright
																													WHAMM	0.617549	3.0824e-16	1.1282e-11	Late	NK CD56bright
																													RELB	0.971623	2.071e-15	7.5801e-11	Late	NK CD56bright
																													RBM39	0.424297	2.6049e-15	9.5345e-11	Late	NK CD56bright
																													CD8A	-0.624264	4.6696e-15	1.7092e-10	Late	NK CD56bright
																													C1orf162	-0.382742	1.5937e-14	5.8331e-10	Late	NK CD56bright
																													COG3	0.775903	2.7446e-14	1.0046e-09	Late	NK CD56bright
																													DYNLL1	-0.394225	2.5348e-13	9.278e-09	Late	NK CD56bright
																													FCGR3A	-0.865604	7.8721e-13	2.8813e-08	Late	NK CD56bright
																													CD300A	-0.333078	8.1279e-13	2.975e-08	Late	NK CD56bright
																													JUN	0.645702	8.9416e-13	3.2728e-08	Late	NK CD56bright
																													SH2D2A	-0.357478	2.3182e-12	8.4849e-08	Late	NK CD56bright
																													CCNL1	0.519611	4.8089e-12	1.7601e-07	Late	NK CD56bright
																													TRA2B	0.442835	5.2659e-12	1.9274e-07	Late	NK CD56bright
																													PTPRA	0.559966	8.7483e-12	3.202e-07	Late	NK CD56bright
																													ARPC5L	0.40887	3.1951e-11	1.1695e-06	Late	NK CD56bright
																													GGNBP2	0.569049	3.6291e-11	1.3283e-06	Late	NK CD56bright
																													CD69	0.353336	4.0747e-11	1.4914e-06	Late	NK CD56bright
																													DENND2D	-0.421817	4.7674e-11	1.7449e-06	Late	NK CD56bright
																													TRMT112	-0.421228	4.7931e-11	1.7544e-06	Late	NK CD56bright
																													SERPINB1	-0.346748	5.1736e-11	1.8937e-06	Late	NK CD56bright
																													NFKB1	0.446301	6.8113e-11	2.4931e-06	Late	NK CD56bright
																													S100A8	-0.611496	1.0129e-10	3.7073e-06	Late	NK CD56bright
																													FUT7	-0.546004	1.2301e-10	4.5024e-06	Late	NK CD56bright
																													ATP6V0E1	-0.365074	1.6616e-10	6.0819e-06	Late	NK CD56bright
																													CLEC2B	0.344811	2.3544e-10	8.6177e-06	Late	NK CD56bright
																													GIMAP1	-0.446305	4.5681e-10	1.672e-05	Late	NK CD56bright
																													CCDC59	0.567032	4.6929e-10	1.7177e-05	Late	NK CD56bright
																													ECH1	-0.40472	5.6928e-10	2.0837e-05	Late	NK CD56bright
																													DNAJA1	0.54742	5.8498e-10	2.1411e-05	Late	NK CD56bright
																													KIR2DL4	-0.396546	6.836e-10	2.5021e-05	Late	NK CD56bright
																													AHR	0.487702	8.142e-10	2.9802e-05	Late	NK CD56bright
																													EP300	0.691655	8.2732e-10	3.0281e-05	Late	NK CD56bright
																													LINC01871	-0.694046	1.1839e-09	4.3333e-05	Late	NK CD56bright
																													CERS6	0.678739	1.6858e-09	6.1703e-05	Late	NK CD56bright
																													RLF	0.600047	1.7752e-09	6.4977e-05	Late	NK CD56bright
																													ZNF600	-0.386412	4.1706e-09	0.00015265	Late	NK CD56bright
																													KDM2A	0.56827	5.2012e-09	0.00019038	Late	NK CD56bright
																													C4orf3	-0.342208	5.3145e-09	0.00019452	Late	NK CD56bright
																													PIM3	0.616567	6.0378e-09	0.000221	Late	NK CD56bright
																													RBBP6	0.50577	6.2839e-09	0.00023	Late	NK CD56bright
																													BCLAF1	0.406958	6.4861e-09	0.0002374	Late	NK CD56bright
																													GAB1	0.576501	6.652e-09	0.00024348	Late	NK CD56bright
																													ATG14	0.782767	1.045e-08	0.00038248	Late	NK CD56bright
																													GNG5	-0.341788	1.0968e-08	0.00040143	Late	NK CD56bright
																													ARID4B	0.38822	1.207e-08	0.00044178	Late	NK CD56bright
																													ARF6	0.330271	1.278e-08	0.00046779	Late	NK CD56bright
																													EPC1	0.407237	1.3853e-08	0.00050705	Late	NK CD56bright
																													RSRC2	0.438481	1.4717e-08	0.00053869	Late	NK CD56bright
																													MYLIP	0.441523	2.1981e-08	0.00080454	Late	NK CD56bright
																													ETF1	0.466951	2.2722e-08	0.00083168	Late	NK CD56bright
																													RAB1A	0.672419	2.7388e-08	0.00100247	Late	NK CD56bright
																													RC3H1	0.546201	3.0463e-08	0.00111499	Late	NK CD56bright
																													SBDS	0.595048	3.639e-08	0.00133195	Late	NK CD56bright
																													YES1	0.552246	4.7024e-08	0.00172117	Late	NK CD56bright
																													IER5	0.695484	5.3156e-08	0.0019456	Late	NK CD56bright
																													HIST1H1C	0.646365	5.4845e-08	0.00200743	Late	NK CD56bright
																													CD27	-0.911201	5.6371e-08	0.0020633	Late	NK CD56bright
																													TRAPPC10	0.325829	7.686e-08	0.00281323	Late	NK CD56bright
																													UBE2J1	0.479931	8.3197e-08	0.00304519	Late	NK CD56bright
																													REL	0.403861	8.4513e-08	0.00309334	Late	NK CD56bright
																													PLEKHF2	0.771233	9.5389e-08	0.00349142	Late	NK CD56bright
																													PRKY	0.555961	9.9433e-08	0.00363944	Late	NK CD56bright
																													PFDN6	-0.486988	1.1874e-07	0.00434618	Late	NK CD56bright
																													RGS10	-0.523638	1.2244e-07	0.0044814	Late	NK CD56bright
																													GPR65	-0.409306	1.3419e-07	0.00491176	Late	NK CD56bright
																													GADD45B	0.52578	1.451e-07	0.00531089	Late	NK CD56bright
																													KDM6A	0.584419	1.5739e-07	0.00576089	Late	NK CD56bright
																													PDCD6	-0.333833	1.6388e-07	0.00599832	Late	NK CD56bright
																													RIOK3	0.465926	1.7189e-07	0.00629142	Late	NK CD56bright
																													IL16	-0.376913	1.9362e-07	0.00708696	Late	NK CD56bright
																													KLF10	0.967788	1.9422e-07	0.00710896	Late	NK CD56bright
																													FMNL1	0.48416	2.1486e-07	0.00786423	Late	NK CD56bright
																													CCS	-0.573989	2.9044e-07	0.0106307	Late	NK CD56bright
																													G6PD	-0.341202	3.1748e-07	0.0116206	Late	NK CD56bright
																													SP3	0.480707	3.3723e-07	0.0123433	Late	NK CD56bright
																													PPP1R16B	0.443504	3.5522e-07	0.0130018	Late	NK CD56bright
																													DDX6	0.335978	3.6683e-07	0.0134266	Late	NK CD56bright
																													MRPL43	-0.460799	3.7945e-07	0.0138885	Late	NK CD56bright
																													SOS2	0.479583	3.9612e-07	0.0144989	Late	NK CD56bright
																													CEBPD	-0.356503	4.1282e-07	0.0151101	Late	NK CD56bright
																													SH2D1B	-0.352797	5.7875e-07	0.0211833	Late	NK CD56bright
																													PILRB	-0.56771	5.8695e-07	0.0214835	Late	NK CD56bright
																													RHOH	0.447146	5.9336e-07	0.0217183	Late	NK CD56bright
																													ZFP36L1	0.392928	7.2409e-07	0.0265033	Late	NK CD56bright
																													HLA-DRB5	0.376263	1.0719e-40	3.9234e-36	Late	cDC
																													SMDT1	0.386536	1.7863e-27	6.5381e-23	Late	cDC
																													HLA-DQA2	1.37504	1.3153e-25	4.8144e-21	Late	cDC
																													FGL2	-0.397584	5.6078e-21	2.0526e-16	Late	cDC
																													CD52	0.450576	2.2001e-20	8.0529e-16	Late	cDC
																													DDIT4	0.857004	7.9589e-18	2.9131e-13	Late	cDC
																													UBC	0.377682	2.2095e-17	8.0871e-13	Late	cDC
																													ZFP36L2	-0.391286	5.3717e-17	1.9661e-12	Late	cDC
																													LMNA	0.665852	6.2371e-17	2.2829e-12	Late	cDC
																													C20orf27	0.3684	6.5644e-16	2.4027e-11	Late	cDC
																													CARD16	-0.342201	1.4761e-15	5.4028e-11	Late	cDC
																													MNDA	-0.377366	2.1213e-15	7.7643e-11	Late	cDC
																													MS4A6A	-0.474241	1.3468e-14	4.9294e-10	Late	cDC
																													MARCH1	-0.439358	1.3221e-13	4.8392e-09	Late	cDC
																													NR4A1	1.3447	1.3898e-13	5.087e-09	Late	cDC
																													F13A1	-0.695585	3.3803e-13	1.2373e-08	Late	cDC
																													NFIL3	1.18227	5.1255e-13	1.876e-08	Late	cDC
																													DYNLL1	-0.462279	1.4907e-12	5.4563e-08	Late	cDC
																													ERAP2	0.696715	3.2602e-12	1.1933e-07	Late	cDC
																													DUSP6	-1.06318	7.4126e-12	2.7132e-07	Late	cDC
																													SNHG5	-0.340381	1.7954e-11	6.5715e-07	Late	cDC
																													GADD45B	0.534914	2.5937e-11	9.4933e-07	Late	cDC
																													LINC01578	0.475057	3.0037e-11	1.0994e-06	Late	cDC
																													ARF6	0.360853	3.0364e-11	1.1114e-06	Late	cDC
																													CSRNP1	1.10968	5.9275e-11	2.1696e-06	Late	cDC
																													PTAFR	-0.736589	6.3872e-11	2.3378e-06	Late	cDC
																													SAT1	0.33619	9.0102e-11	3.2979e-06	Late	cDC
																													PLAUR	0.623916	1.9467e-10	7.1254e-06	Late	cDC
																													CD83	0.867473	2.2935e-10	8.3948e-06	Late	cDC
																													CXCR4	0.756431	3.3639e-10	1.2312e-05	Late	cDC
																													FABP5	-0.48111	3.7807e-10	1.3838e-05	Late	cDC
																													NFKBIA	0.564029	5.2356e-10	1.9163e-05	Late	cDC
																													GSAP	-0.716422	6.3917e-10	2.3395e-05	Late	cDC
																													CD14	-0.798361	6.8176e-10	2.4954e-05	Late	cDC
																													HIST1H1E	0.7584	2.2042e-09	8.0676e-05	Late	cDC
																													PDE4B	0.651101	3.3031e-09	0.0001209	Late	cDC
																													CCDC59	0.583309	4.3736e-09	0.00016008	Late	cDC
																													AL034397.3	-0.6897	5.0054e-09	0.00018321	Late	cDC
																													HBEGF	1.10468	6.41e-09	0.00023462	Late	cDC
																													DUSP5	1.07877	7.5349e-09	0.00027579	Late	cDC
																													COG3	0.90734	7.7166e-09	0.00028244	Late	cDC
																													RPS4Y1	0.358627	9.6125e-09	0.00035184	Late	cDC
																													MAP3K8	0.357438	1.2332e-08	0.00045136	Late	cDC
																													NRROS	0.435305	1.7369e-08	0.00063574	Late	cDC
																													KCTD12	-0.398864	2.2089e-08	0.0008085	Late	cDC
																													HIST1H1C	0.63467	5.1503e-08	0.00188511	Late	cDC
																													TNFAIP8L2	-0.545604	5.8172e-08	0.0021292	Late	cDC
																													RIPK2	0.671538	6.1423e-08	0.00224819	Late	cDC
																													SETX	-0.385833	6.965e-08	0.00254934	Late	cDC
																													TNNT1	0.999469	8.9414e-08	0.00327273	Late	cDC
																													C16orf54	-0.751219	9.4684e-08	0.00346564	Late	cDC
																													SNHG15	0.511627	1.2429e-07	0.00454914	Late	cDC
																													HLA-DQB2	0.484925	1.359e-07	0.00497433	Late	cDC
																													GPR183	0.701032	1.4248e-07	0.00521518	Late	cDC
																													TSC22D3	-0.34275	1.8076e-07	0.00661631	Late	cDC
																													TMEM165	-0.410652	1.9573e-07	0.00716394	Late	cDC
																													SCLT1	-0.38351	2.5869e-07	0.00946875	Late	cDC
																													HRH2	-0.426168	3.583e-07	0.0131145	Late	cDC
																													EPC1	0.525965	3.7102e-07	0.01358	Late	cDC
																													IL6R	-0.403593	3.7153e-07	0.0135988	Late	cDC
																													UBTF	-0.389644	4.0167e-07	0.0147019	Late	cDC
																													MEF2D	0.574964	4.3355e-07	0.0158688	Late	cDC
																													WHAMM	0.740764	4.406e-07	0.0161267	Late	cDC
																													RIPOR2	-0.338807	5.0916e-07	0.0186363	Late	cDC
																													MLEC	-0.361179	5.1519e-07	0.0188568	Late	cDC
																													FPR1	-0.536913	5.5457e-07	0.0202984	Late	cDC
																													IFI44L	0.768885	6.7859e-07	0.0248378	Late	cDC
																													GIMAP7	-0.620336	6.9652e-07	0.025494	Late	cDC
																													ITM2C	-0.740008	8.0258e-07	0.0293761	Late	cDC
																													CACNA2D3	-0.43197	8.6561e-07	0.031683	Late	cDC
																													RABGEF1	0.650537	1.0234e-06	0.0374577	Late	cDC
																													PHLDA2	0.997096	1.0654e-06	0.0389959	Late	cDC
																													PIM3	0.468688	1.1358e-06	0.0415741	Late	cDC
																													MS4A7	-0.451961	1.1621e-06	0.0425342	Late	cDC
																													AC004448.2	2.74894	3.1425e-27	1.1502e-22	Late	gdT
																													RPS4Y1	0.770247	9.431e-15	3.4519e-10	Late	gdT
																													NFKBIA	0.805996	7.8291e-10	2.8656e-05	Late	gdT
																													DUSP2	0.785696	8.4663e-10	3.0989e-05	Late	gdT
																													UBC	0.404517	2.5116e-09	9.193e-05	Late	gdT
																													CD69	0.67365	2.6492e-09	9.6965e-05	Late	gdT
																													RBFOX2	1.17318	2.2138e-08	0.00081028	Late	gdT
																													CXCR4	0.680554	4.2743e-08	0.00156446	Late	gdT
																													JUN	0.962765	2.8296e-07	0.0103567	Late	gdT
																													HLA-DRB5	1.08669	4.4161e-23	1.6164e-18	Very Late	B-Cell Naive
																													JUND	0.976449	1.1455e-21	4.1927e-17	Very Late	B-Cell Naive
																													HLA-A	0.409955	8.0283e-17	2.9385e-12	Very Late	B-Cell Naive
																													TSC22D3	1.58919	9.1322e-17	3.3426e-12	Very Late	B-Cell Naive
																													SNHG5	1.52526	5.3033e-15	1.9411e-10	Very Late	B-Cell Naive
																													CXCR4	1.35338	4.9907e-14	1.8267e-09	Very Late	B-Cell Naive
																													RPS18	-0.510319	1.17e-12	4.2824e-08	Very Late	B-Cell Naive
																													CD69	1.44404	7.456e-12	2.7291e-07	Very Late	B-Cell Naive
																													HLA-C	-0.34572	1.3296e-11	4.8666e-07	Very Late	B-Cell Naive
																													UBC	0.543425	2.4195e-11	8.856e-07	Very Late	B-Cell Naive
																													PLP2	0.549097	1.361e-10	4.9817e-06	Very Late	B-Cell Naive
																													DUSP5	2.20036	1.3855e-10	5.0712e-06	Very Late	B-Cell Naive
																													KLF6	0.764876	4.3675e-10	1.5986e-05	Very Late	B-Cell Naive
																													RPL3	-0.487641	1.4253e-09	5.217e-05	Very Late	B-Cell Naive
																													EZR	0.99247	3.3292e-09	0.00012186	Very Late	B-Cell Naive
																													RPS29	0.756423	3.8194e-09	0.0001398	Very Late	B-Cell Naive
																													JUN	1.3136	9.818e-09	0.00035936	Very Late	B-Cell Naive
																													EIF5A	0.511663	1.141e-08	0.00041763	Very Late	B-Cell Naive
																													HIST1H1E	1.02686	2.5893e-08	0.00094774	Very Late	B-Cell Naive
																													NFKBIA	1.31866	3.6068e-08	0.00132017	Very Late	B-Cell Naive
																													DUSP1	1.13593	3.6209e-08	0.00132532	Very Late	B-Cell Naive
																													IFITM1	0.332338	4.1341e-08	0.00151318	Very Late	B-Cell Naive
																													CCL4	-2.15934	8.6597e-08	0.00316964	Very Late	B-Cell Naive
																													PPP1R15A	1.01682	9.8064e-08	0.00358934	Very Late	B-Cell Naive
																													HNRNPDL	0.435555	1.0168e-07	0.00372171	Very Late	B-Cell Naive
																													JUNB	1.21972	1.2822e-07	0.00469309	Very Late	B-Cell Naive
																													MT-CO1	-0.355218	1.9061e-07	0.00697686	Very Late	B-Cell Naive
																													CD83	1.94085	2.0755e-07	0.00759682	Very Late	B-Cell Naive
																													HMGB1	0.464333	2.5256e-07	0.00924405	Very Late	B-Cell Naive
																													YWHAZ	0.348433	2.8995e-07	0.0106127	Very Late	B-Cell Naive
																													COMMD6	0.329774	4.1974e-07	0.0153632	Very Late	B-Cell Naive
																													TMEM123	0.857751	4.5047e-07	0.0164882	Very Late	B-Cell Naive
																													H1FX	0.897789	5.3921e-07	0.0197362	Very Late	B-Cell Naive
																													RPL38	0.554303	7.9689e-07	0.0291679	Very Late	B-Cell Naive
																													SNX9	1.87792	1.2114e-06	0.0443383	Very Late	B-Cell Naive
																													RPLP0	-0.420763	5.0256e-39	1.8395e-34	Very Late	CD4.CTL.GNLY
																													RPS5	-0.38282	1.2086e-29	4.4239e-25	Very Late	CD4.CTL.GNLY
																													AOAH	1.01422	1.383e-19	5.0621e-15	Very Late	CD4.CTL.GNLY
																													FP236383.3	0.387734	3.0325e-18	1.11e-13	Very Late	CD4.CTL.GNLY
																													LINC02384	1.34713	1.6314e-17	5.9714e-13	Very Late	CD4.CTL.GNLY
																													HLA-DQA1	1.1527	1.7728e-17	6.4889e-13	Very Late	CD4.CTL.GNLY
																													RPS4Y1	-1.04437	4.138e-16	1.5146e-11	Very Late	CD4.CTL.GNLY
																													EEF1B2	-0.344174	7.2937e-16	2.6696e-11	Very Late	CD4.CTL.GNLY
																													HLA-DPB1	0.543569	2.0878e-15	7.6417e-11	Very Late	CD4.CTL.GNLY
																													NPDC1	-0.532692	1.4032e-13	5.1358e-09	Very Late	CD4.CTL.GNLY
																													CX3CR1	0.467391	2.6531e-13	9.711e-09	Very Late	CD4.CTL.GNLY
[truncated: 372 more rows]

## Sheet: Suppl_Table_7
Sequencing Run 1: To use this as a reference for cellranger, line 1 must be removed and the sheet saved as csv (or on the Github repo for this publication (data/feature_reference_b1.csv)
id,name,read,pattern,sequence,feature_type
CD3e,CD3E_proteona,R2,5PNNNNNNNNNN(BC),CTCATTGTAACTCCT,Antibody Capture
CD4,CD4_proteona,R2,5PNNNNNNNNNN(BC),TGTTCCCGCTCAACT,Antibody Capture
CD8a,CD8A_proteona,R2,5PNNNNNNNNNN(BC),GCTGCGCTTTCCATT,Antibody Capture
CD11b,CD11B_proteona,R2,5PNNNNNNNNNN(BC),GACAAGTGATCTGCA,Antibody Capture
CD11c,CD11C_proteona,R2,5PNNNNNNNNNN(BC),TACGCCTATAACTTG,Antibody Capture
CD14,CD14_proteona,R2,5PNNNNNNNNNN(BC),TCTCAGACCTCCGTA,Antibody Capture
CD15,CD15_proteona,R2,5PNNNNNNNNNN(BC),TCACCAGTACCTAGT,Antibody Capture
CD16,CD16_proteona,R2,5PNNNNNNNNNN(BC),AAGTTCACTCTTTGC,Antibody Capture
CD19,CD19_proteona,R2,5PNNNNNNNNNN(BC),CTGGGCAATTACTCG,Antibody Capture
CD25,CD25_proteona,R2,5PNNNNNNNNNN(BC),TTTGTCCTGTACGCC,Antibody Capture
CD28,CD28_proteona,R2,5PNNNNNNNNNN(BC),TGAGAACGACCCTAA,Antibody Capture
CD33,CD33_proteona,R2,5PNNNNNNNNNN(BC),TAACTCAGGGCCTAT,Antibody Capture
CD38,CD38_proteona,R2,5PNNNNNNNNNN(BC),CCTATTCCGATTCCG,Antibody Capture
CD39,CD39_proteona,R2,5PNNNNNNNNNN(BC),TTACCTGGTATCCGT,Antibody Capture
CD40,CD40_proteona,R2,5PNNNNNNNNNN(BC),CTCAGATGGAGTATG,Antibody Capture
CD45,CD45_proteona,R2,5PNNNNNNNNNN(BC),TGCAATTACCCGGAT,Antibody Capture
CD45RA,CD45RA_proteona,R2,5PNNNNNNNNNN(BC),TCAATCCTTCCGCTT,Antibody Capture
CD45RO,CD45RO_proteona,R2,5PNNNNNNNNNN(BC),CTCCGAATCATGTTG,Antibody Capture
CD56,CD56_proteona,R2,5PNNNNNNNNNN(BC),TCCTTTCCTGATAGG,Antibody Capture
CD57,CD57_proteona,R2,5PNNNNNNNNNN(BC),AACTCCCTATGGAGG,Antibody Capture
CD62L,CD62L_proteona,R2,5PNNNNNNNNNN(BC),GTCCCTGCAACTTGA,Antibody Capture
CD69,CD69_proteona,R2,5PNNNNNNNNNN(BC),GTCTCTTGGCTTAAA,Antibody Capture
CD80,CD80_proteona,R2,5PNNNNNNNNNN(BC),ACGAATCAATCTGTG,Antibody Capture
CD81,CD81_proteona,R2,5PNNNNNNNNNN(BC),GTATCCTTCCTTGGC,Antibody Capture
CD94,CD94_proteona,R2,5PNNNNNNNNNN(BC),CTTTCCGGTCCTACA,Antibody Capture
CD95,CD95_proteona,R2,5PNNNNNNNNNN(BC),CCAGCTCATTAGAGC,Antibody Capture
CD107a,CD107A_proteona,R2,5PNNNNNNNNNN(BC),CAGCCCACTGCAATA,Antibody Capture
CD117,CD117_proteona,R2,5PNNNNNNNNNN(BC),AGACTAATAGCTGAC,Antibody Capture
CD123,CD123_proteona,R2,5PNNNNNNNNNN(BC),CTTCACTCTGTCAGG,Antibody Capture
CD127,CD127_proteona,R2,5PNNNNNNNNNN(BC),GTGTGTTGTCCTATG,Antibody Capture
CD134,CD134_proteona,R2,5PNNNNNNNNNN(BC),AACCCACCGTTGTTA,Antibody Capture
CD137,CD137_proteona,R2,5PNNNNNNNNNN(BC),CAGTAAGTTCGGGAC,Antibody Capture
CD138,CD138_proteona,R2,5PNNNNNNNNNN(BC),ACTCTTTCGTTTACG,Antibody Capture
CD141,CD141_proteona,R2,5PNNNNNNNNNN(BC),GGATAACCGCGCTTT,Antibody Capture
CD152,CD152_proteona,R2,5PNNNNNNNNNN(BC),ATGGTTCACGTAATC,Antibody Capture
CD160,CD160_proteona,R2,5PNNNNNNNNNN(BC),GGCTAGAAATCAACG,Antibody Capture
CD161,CD161_proteona,R2,5PNNNNNNNNNN(BC),GTACGCAGTCCTTCT,Antibody Capture
CD183,CD183_proteona,R2,5PNNNNNNNNNN(BC),GCGATGGTAGATTAT,Antibody Capture
CD195,CD195_proteona,R2,5PNNNNNNNNNN(BC),CCAAAGTAAGAGCCA,Antibody Capture
CD197,CD197_proteona,R2,5PNNNNNNNNNN(BC),AGTTCAGTCAACCGA,Antibody Capture
CD200,CD200_proteona,R2,5PNNNNNNNNNN(BC),CACGTAGACCTTTGC,Antibody Capture
CD223,CD223_proteona,R2,5PNNNNNNNNNN(BC),CATTTGTCTGCCGGT,Antibody Capture
CD244,CD244_proteona,R2,5PNNNNNNNNNN(BC),TCGCTTGGATGGTAG,Antibody Capture
CD269,CD269_proteona,R2,5PNNNNNNNNNN(BC),CAGATGATCCACCAT,Antibody Capture
CD273,CD273_proteona,R2,5PNNNNNNNNNN(BC),TCAACGCTTGGCTAG,Antibody Capture
CD274,CD274_proteona,R2,5PNNNNNNNNNN(BC),GTTGTCCGACAATAC,Antibody Capture
CD278,CD278_proteona,R2,5PNNNNNNNNNN(BC),CGCGCACCCATTAAA,Antibody Capture
CD279,CD279_proteona,R2,5PNNNNNNNNNN(BC),ACAGCGCCGTATTTA,Antibody Capture
CD294,CD294_proteona,R2,5PNNNNNNNNNN(BC),TGTTTACGAGAGCCC,Antibody Capture
CD314,CD314_proteona,R2,5PNNNNNNNNNN(BC),CGTGTTTGTTCCTCA,Antibody Capture
CD319,CD319_proteona,R2,5PNNNNNNNNNN(BC),AGTATGCCATGTCTT,Antibody Capture
CD337,CD337_proteona,R2,5PNNNNNNNNNN(BC),AAAGTCACTCTGCCG,Antibody Capture
CD357,CD357_proteona,R2,5PNNNNNNNNNN(BC),ACCTTTCGACACTCG,Antibody Capture
CD366,CD366_proteona,R2,5PNNNNNNNNNN(BC),TGTCCTACCCAACTT,Antibody Capture
CD307,CD307_proteona,R2,5PNNNNNNNNNN(BC),TCACGCAGTCCTCAA,Antibody Capture
TCRAB,TCRAB_proteona,R2,5PNNNNNNNNNN(BC),CGTAACGTAGAGCGA,Antibody Capture
TCRV2,TCRV2_proteona,R2,5PNNNNNNNNNN(BC),TCAGTCAGATGGTAT,Antibody Capture
CCR10,CCR10_proteona,R2,5PNNNNNNNNNN(BC),ATCTGTATGTCACAG,Antibody Capture
HLA-DR,HLA-DR_proteona,R2,5PNNNNNNNNNN(BC),AATAGCGAGCAAGTA,Antibody Capture
KLRG1,KLRG1_proteona,R2,5PNNNNNNNNNN(BC),GTAGTAGGCTAGACC,Antibody Capture
TIGIT,TIGIT_proteona,R2,5PNNNNNNNNNN(BC),TTGCTTACCGCCAGA,Antibody Capture
FITC,FITC_proteona,R2,5PNNNNNNNNNN(BC),TTTGTGTTGTGGTAC,Antibody Capture
PE,PE_proteona,R2,5PNNNNNNNNNN(BC),TGACCAGTTCCGCAT,Antibody Capture

## Sheet: Suppl_Table_8
Sequencing Run 2: To use this as a reference for cellranger, line 1 must be removed and the sheet saved as csv (or on the Github repo for this publication (data/feature_reference_b2.csv)
id,name,read,pattern,sequence,feature_type
CD3e,totalseqC_CD3e,R2,5PNNNNNNNNNN(BC),CTCATTGTAACTCCT,Antibody Capture
CD4,totalseqC_CD4,R2,5PNNNNNNNNNN(BC),TGTTCCCGCTCAACT,Antibody Capture
CD8a,totalseqC_CD8a,R2,5PNNNNNNNNNN(BC),GCTGCGCTTTCCATT,Antibody Capture
CD11b,totalseqC_CD11b,R2,5PNNNNNNNNNN(BC),GACAAGTGATCTGCA,Antibody Capture
CD11c,totalseqC_CD11c,R2,5PNNNNNNNNNN(BC),TACGCCTATAACTTG,Antibody Capture
CD14,totalseqC_CD14,R2,5PNNNNNNNNNN(BC),TCTCAGACCTCCGTA,Antibody Capture
CD15,totalseqC_CD15,R2,5PNNNNNNNNNN(BC),TCACCAGTACCTAGT,Antibody Capture
CD16,totalseqC_CD16,R2,5PNNNNNNNNNN(BC),AAGTTCACTCTTTGC,Antibody Capture
CD19,totalseqC_CD19,R2,5PNNNNNNNNNN(BC),CTGGGCAATTACTCG,Antibody Capture
CD25,totalseqC_CD25,R2,5PNNNNNNNNNN(BC),TTTGTCCTGTACGCC,Antibody Capture
CD28,totalseqC_CD28,R2,5PNNNNNNNNNN(BC),TGAGAACGACCCTAA,Antibody Capture
CD33,totalseqC_CD33,R2,5PNNNNNNNNNN(BC),TAACTCAGGGCCTAT,Antibody Capture
CD38,totalseqC_CD38,R2,5PNNNNNNNNNN(BC),CCTATTCCGATTCCG,Antibody Capture
CD39,totalseqC_CD39,R2,5PNNNNNNNNNN(BC),TTACCTGGTATCCGT,Antibody Capture
CD40,totalseqC_CD40,R2,5PNNNNNNNNNN(BC),CTCAGATGGAGTATG,Antibody Capture
CD45,totalseqC_CD45,R2,5PNNNNNNNNNN(BC),TGCAATTACCCGGAT,Antibody Capture
CD45RA,totalseqC_CD45RA,R2,5PNNNNNNNNNN(BC),TCAATCCTTCCGCTT,Antibody Capture
CD45RO,totalseqC_CD45RO,R2,5PNNNNNNNNNN(BC),CTCCGAATCATGTTG,Antibody Capture
CD56,totalseqC_CD56,R2,5PNNNNNNNNNN(BC),TCCTTTCCTGATAGG,Antibody Capture
CD57,totalseqC_CD57,R2,5PNNNNNNNNNN(BC),AACTCCCTATGGAGG,Antibody Capture
CD62L,totalseqC_CD62L,R2,5PNNNNNNNNNN(BC),GTCCCTGCAACTTGA,Antibody Capture
CD69,totalseqC_CD69,R2,5PNNNNNNNNNN(BC),GTCTCTTGGCTTAAA,Antibody Capture
CD80,totalseqC_CD80,R2,5PNNNNNNNNNN(BC),ACGAATCAATCTGTG,Antibody Capture
CD81,totalseqC_CD81,R2,5PNNNNNNNNNN(BC),GTATCCTTCCTTGGC,Antibody Capture
CD94,totalseqC_CD94,R2,5PNNNNNNNNNN(BC),CTTTCCGGTCCTACA,Antibody Capture
CD95,totalseqC_CD95,R2,5PNNNNNNNNNN(BC),CCAGCTCATTAGAGC,Antibody Capture
CD107a,totalseqC_CD107a,R2,5PNNNNNNNNNN(BC),CAGCCCACTGCAATA,Antibody Capture
CD117,totalseqC_CD117,R2,5PNNNNNNNNNN(BC),AGACTAATAGCTGAC,Antibody Capture
CD123,totalseqC_CD123,R2,5PNNNNNNNNNN(BC),CTTCACTCTGTCAGG,Antibody Capture
CD127,totalseqC_CD127,R2,5PNNNNNNNNNN(BC),GTGTGTTGTCCTATG,Antibody Capture
CD134,totalseqC_CD134,R2,5PNNNNNNNNNN(BC),AACCCACCGTTGTTA,Antibody Capture
CD137,totalseqC_CD137,R2,5PNNNNNNNNNN(BC),CAGTAAGTTCGGGAC,Antibody Capture
CD138,totalseqC_CD138,R2,5PNNNNNNNNNN(BC),ACTCTTTCGTTTACG,Antibody Capture
CD141,totalseqC_CD141,R2,5PNNNNNNNNNN(BC),GGATAACCGCGCTTT,Antibody Capture
CD152,totalseqC_CD152,R2,5PNNNNNNNNNN(BC),ATGGTTCACGTAATC,Antibody Capture
CD160,totalseqC_CD160,R2,5PNNNNNNNNNN(BC),GGCTAGAAATCAACG,Antibody Capture
CD161,totalseqC_CD161,R2,5PNNNNNNNNNN(BC),GTACGCAGTCCTTCT,Antibody Capture
CD183,totalseqC_CD183,R2,5PNNNNNNNNNN(BC),GCGATGGTAGATTAT,Antibody Capture
CD195,totalseqC_CD195,R2,5PNNNNNNNNNN(BC),CCAAAGTAAGAGCCA,Antibody Capture
CD197,totalseqC_CD197,R2,5PNNNNNNNNNN(BC),AGTTCAGTCAACCGA,Antibody Capture
CD200,totalseqC_CD200,R2,5PNNNNNNNNNN(BC),CACGTAGACCTTTGC,Antibody Capture
CD223,totalseqC_CD223,R2,5PNNNNNNNNNN(BC),CATTTGTCTGCCGGT,Antibody Capture
CD244,totalseqC_CD244,R2,5PNNNNNNNNNN(BC),TCGCTTGGATGGTAG,Antibody Capture
CD269,totalseqC_CD269,R2,5PNNNNNNNNNN(BC),CAGATGATCCACCAT,Antibody Capture
CD273,totalseqC_CD273,R2,5PNNNNNNNNNN(BC),TCAACGCTTGGCTAG,Antibody Capture
CD274,totalseqC_CD274,R2,5PNNNNNNNNNN(BC),GTTGTCCGACAATAC,Antibody Capture
CD278,totalseqC_CD278,R2,5PNNNNNNNNNN(BC),CGCGCACCCATTAAA,Antibody Capture
CD279,totalseqC_CD279,R2,5PNNNNNNNNNN(BC),ACAGCGCCGTATTTA,Antibody Capture
CD294,totalseqC_CD294,R2,5PNNNNNNNNNN(BC),TGTTTACGAGAGCCC,Antibody Capture
CD314,totalseqC_CD314,R2,5PNNNNNNNNNN(BC),CGTGTTTGTTCCTCA,Antibody Capture
CD319,totalseqC_CD319,R2,5PNNNNNNNNNN(BC),AGTATGCCATGTCTT,Antibody Capture
CD337,totalseqC_CD337,R2,5PNNNNNNNNNN(BC),AAAGTCACTCTGCCG,Antibody Capture
CD357,totalseqC_CD357,R2,5PNNNNNNNNNN(BC),ACCTTTCGACACTCG,Antibody Capture
CD366 ,totalseqC_CD366 ,R2,5PNNNNNNNNNN(BC),TGTCCTACCCAACTT,Antibody Capture
TCRAB,totalseqC_TCRAB,R2,5PNNNNNNNNNN(BC),CGTAACGTAGAGCGA,Antibody Capture
TCRV2,totalseqC_TCRV2,R2,5PNNNNNNNNNN(BC),TCAGTCAGATGGTAT,Antibody Capture
CCR10,totalseqC_CCR10,R2,5PNNNNNNNNNN(BC),ATCTGTATGTCACAG,Antibody Capture
HLA-DR,totalseqC_HLA-DR,R2,5PNNNNNNNNNN(BC),AATAGCGAGCAAGTA,Antibody Capture
KLRG1,totalseqC_KLRG1,R2,5PNNNNNNNNNN(BC),GTAGTAGGCTAGACC,Antibody Capture
TIGIT,totalseqC_TIGIT,R2,5PNNNNNNNNNN(BC),TTGCTTACCGCCAGA,Antibody Capture
CD307,totalseqC_CD307,R2,5PNNNNNNNNNN(BC),TCACGCAGTCCTCAA,Antibody Capture
FITC,totalseqC_FITC,R2,5PNNNNNNNNNN(BC),TTTGTGTTGTGGTAC,Antibody Capture
PE,totalseqC_PE,R2,5PNNNNNNNNNN(BC),TGACCAGTTCCGCAT,Antibody Capture
Hashtag_1,totalseqC_Hashtag_1,R2,5PNNNNNNNNNN(BC),GTCAACTCTTTAGCG,Antibody Capture
Hashtag_2,totalseqC_Hashtag_2,R2,5PNNNNNNNNNN(BC),TGATGGCCTATTGGG,Antibody Capture

## Sheet: Suppl_Table_9
Sequencing Run 3 and 4: To use this as a reference for cellranger, line 1 must be removed and the sheet saved as csv (or on the Github repo for this publication (data/feature_reference_b3.csv)
id,name,read,pattern,sequence,feature_type
CCR10,totalseqC_CCR10,R2,5PNNNNNNNNNN(BC),ATCTGTATGTCACAG,Antibody Capture
CD107a,totalseqC_CD107a,R2,5PNNNNNNNNNN(BC),CAGCCCACTGCAATA,Antibody Capture
CD117,totalseqC_CD117,R2,5PNNNNNNNNNN(BC),AGACTAATAGCTGAC,Antibody Capture
CD11b,totalseqC_CD11b,R2,5PNNNNNNNNNN(BC),GACAAGTGATCTGCA,Antibody Capture
CD11c,totalseqC_CD11c,R2,5PNNNNNNNNNN(BC),TACGCCTATAACTTG,Antibody Capture
CD123,totalseqC_CD123,R2,5PNNNNNNNNNN(BC),CTTCACTCTGTCAGG,Antibody Capture
CD127,totalseqC_CD127,R2,5PNNNNNNNNNN(BC),GTGTGTTGTCCTATG,Antibody Capture
CD134,totalseqC_CD134,R2,5PNNNNNNNNNN(BC),AACCCACCGTTGTTA,Antibody Capture
CD137,totalseqC_CD137,R2,5PNNNNNNNNNN(BC),CAGTAAGTTCGGGAC,Antibody Capture
CD138,totalseqC_CD138,R2,5PNNNNNNNNNN(BC),ACTCTTTCGTTTACG,Antibody Capture
CD14,totalseqC_CD14,R2,5PNNNNNNNNNN(BC),TCTCAGACCTCCGTA,Antibody Capture
CD141,totalseqC_CD141,R2,5PNNNNNNNNNN(BC),GGATAACCGCGCTTT,Antibody Capture
CD15,totalseqC_CD15,R2,5PNNNNNNNNNN(BC),TCACCAGTACCTAGT,Antibody Capture
CD152,totalseqC_CD152,R2,5PNNNNNNNNNN(BC),ATGGTTCACGTAATC,Antibody Capture
CD16,totalseqC_CD16,R2,5PNNNNNNNNNN(BC),AAGTTCACTCTTTGC,Antibody Capture
CD160,totalseqC_CD160,R2,5PNNNNNNNNNN(BC),GGCTAGAAATCAACG,Antibody Capture
CD161,totalseqC_CD161,R2,5PNNNNNNNNNN(BC),GTACGCAGTCCTTCT,Antibody Capture
CD183,totalseqC_CD183,R2,5PNNNNNNNNNN(BC),GCGATGGTAGATTAT,Antibody Capture
CD19,totalseqC_CD19,R2,5PNNNNNNNNNN(BC),CTGGGCAATTACTCG,Antibody Capture
CD195,totalseqC_CD195,R2,5PNNNNNNNNNN(BC),CCAAAGTAAGAGCCA,Antibody Capture
CD197,totalseqC_CD197,R2,5PNNNNNNNNNN(BC),AGTTCAGTCAACCGA,Antibody Capture
CD1D,totalseqC_CD1D,R2,5PNNNNNNNNNN(BC),TCGAGTCGCTTATCA,Antibody Capture
CD200,totalseqC_CD200,R2,5PNNNNNNNNNN(BC),CACGTAGACCTTTGC,Antibody Capture
CD223,totalseqC_CD223,R2,5PNNNNNNNNNN(BC),CATTTGTCTGCCGGT,Antibody Capture
CD229,totalseqC_CD229,R2,5PNNNNNNNNNN(BC),ATAGAACCCAACTTC,Antibody Capture
CD244,totalseqC_CD244,R2,5PNNNNNNNNNN(BC),TCGCTTGGATGGTAG,Antibody Capture
CD25,totalseqC_CD25,R2,5PNNNNNNNNNN(BC),TTTGTCCTGTACGCC,Antibody Capture
CD269,totalseqC_CD269,R2,5PNNNNNNNNNN(BC),CAGATGATCCACCAT,Antibody Capture
CD27,totalseqC_CD27,R2,5PNNNNNNNNNN(BC),GCACTCCTGCATGTA,Antibody Capture
CD273,totalseqC_CD273,R2,5PNNNNNNNNNN(BC),TCAACGCTTGGCTAG,Antibody Capture
CD274,totalseqC_CD274,R2,5PNNNNNNNNNN(BC),GTTGTCCGACAATAC,Antibody Capture
CD278,totalseqC_CD278,R2,5PNNNNNNNNNN(BC),CGCGCACCCATTAAA,Antibody Capture
CD279,totalseqC_CD279,R2,5PNNNNNNNNNN(BC),ACAGCGCCGTATTTA,Antibody Capture
CD28,totalseqC_CD28,R2,5PNNNNNNNNNN(BC),TGAGAACGACCCTAA,Antibody Capture
CD294,totalseqC_CD294,R2,5PNNNNNNNNNN(BC),TGTTTACGAGAGCCC,Antibody Capture
CD307,totalseqC_CD307,R2,5PNNNNNNNNNN(BC),TCACGCAGTCCTCAA,Antibody Capture
CD314,totalseqC_CD314,R2,5PNNNNNNNNNN(BC),CGTGTTTGTTCCTCA,Antibody Capture
CD319,totalseqC_CD319,R2,5PNNNNNNNNNN(BC),AGTATGCCATGTCTT,Antibody Capture
CD33,totalseqC_CD33,R2,5PNNNNNNNNNN(BC),TAACTCAGGGCCTAT,Antibody Capture
CD335,totalseqC_CD335,R2,5PNNNNNNNNNN(BC),ACAATTTGAACAGCG,Antibody Capture
CD337,totalseqC_CD337,R2,5PNNNNNNNNNN(BC),AAAGTCACTCTGCCG,Antibody Capture
CD357,totalseqC_CD357,R2,5PNNNNNNNNNN(BC),ACCTTTCGACACTCG,Antibody Capture
CD366 ,totalseqC_CD366 ,R2,5PNNNNNNNNNN(BC),TGTCCTACCCAACTT,Antibody Capture
CD38,totalseqC_CD38,R2,5PNNNNNNNNNN(BC),CCTATTCCGATTCCG,Antibody Capture
CD39,totalseqC_CD39,R2,5PNNNNNNNNNN(BC),TTACCTGGTATCCGT,Antibody Capture
CD3e,totalseqC_CD3e,R2,5PNNNNNNNNNN(BC),CTCATTGTAACTCCT,Antibody Capture
CD4,totalseqC_CD4,R2,5PNNNNNNNNNN(BC),TGTTCCCGCTCAACT,Antibody Capture
CD40,totalseqC_CD40,R2,5PNNNNNNNNNN(BC),CTCAGATGGAGTATG,Antibody Capture
CD45,totalseqC_CD45,R2,5PNNNNNNNNNN(BC),TGCAATTACCCGGAT,Antibody Capture
CD45RA,totalseqC_CD45RA,R2,5PNNNNNNNNNN(BC),TCAATCCTTCCGCTT,Antibody Capture
CD45RO,totalseqC_CD45RO,R2,5PNNNNNNNNNN(BC),CTCCGAATCATGTTG,Antibody Capture
CD56,totalseqC_CD56,R2,5PNNNNNNNNNN(BC),TCCTTTCCTGATAGG,Antibody Capture
CD57,totalseqC_CD57,R2,5PNNNNNNNNNN(BC),AACTCCCTATGGAGG,Antibody Capture
CD62L,totalseqC_CD62L,R2,5PNNNNNNNNNN(BC),GTCCCTGCAACTTGA,Antibody Capture
CD69,totalseqC_CD69,R2,5PNNNNNNNNNN(BC),GTCTCTTGGCTTAAA,Antibody Capture
CD73,totalseqC_CD73,R2,5PNNNNNNNNNN(BC),CAGTTCCTCAGTTCG,Antibody Capture
CD80,totalseqC_CD80,R2,5PNNNNNNNNNN(BC),ACGAATCAATCTGTG,Antibody Capture
CD81,totalseqC_CD81,R2,5PNNNNNNNNNN(BC),GTATCCTTCCTTGGC,Antibody Capture
CD8a,totalseqC_CD8a,R2,5PNNNNNNNNNN(BC),GCTGCGCTTTCCATT,Antibody Capture
CD94,totalseqC_CD94,R2,5PNNNNNNNNNN(BC),CTTTCCGGTCCTACA,Antibody Capture
CD95,totalseqC_CD95,R2,5PNNNNNNNNNN(BC),CCAGCTCATTAGAGC,Antibody Capture
FITC,totalseqC_FITC,R2,5PNNNNNNNNNN(BC),TTTGTGTTGTGGTAC,Antibody Capture
HLA-DR,totalseqC_HLA-DR,R2,5PNNNNNNNNNN(BC),AATAGCGAGCAAGTA,Antibody Capture
ITGB7,totalseqC_ITGB7,R2,5PNNNNNNNNNN(BC),TCCTTGGATGTACCG,Antibody Capture
KLRG1,totalseqC_KLRG1,R2,5PNNNNNNNNNN(BC),GTAGTAGGCTAGACC,Antibody Capture
PE,totalseqC_PE,R2,5PNNNNNNNNNN(BC),TGACCAGTTCCGCAT,Antibody Capture
TACI,totalseqC_TACI,R2,5PNNNNNNNNNN(BC),AGTGATGGAGCGAAC,Antibody Capture
TCRab,totalseqC_TCRab,R2,5PNNNNNNNNNN(BC),CGTAACGTAGAGCGA,Antibody Capture
TCRvd2,totalseqC_TCRvd2,R2,5PNNNNNNNNNN(BC),TCAGTCAGATGGTAT,Antibody Capture
TIGIT,totalseqC_TIGIT,R2,5PNNNNNNNNNN(BC),TTGCTTACCGCCAGA,Antibody Capture
